# Supplementary material for: Integrin α5β1 nano-presentation regulates collective keratinocyte migration independent of substrate rigidity
Source: eLife. 2021 Sep 23;10:e69861. doi: 10.7554/eLife.69861 (PMC8460267; doi:10.7554/eLife.69861)
Supplement: Figure 1—source data 1. [file elife-69861-fig1-data1.xlsx]

## Sheet: Sheet1
	migration speed												migration speed
		Speed (µm/h)												Speed (µm/h)
		HaCaT			hKC			nHEK						35nm	50nm	70nm
	a5b1 mimetic	35nm	50nm	70nm	35nm	50nm	70nm	35nm	50nm	70nm			c(RGDfK)	10.8333	9.33333	1.31687
		7.37143	13.9967	4.11405	9.56	39.52	17.84	10.15	16.55	7.7				8.54167	8.31111	3.58025
		4.72733	12.5191	4.25351	11.28	29.735	16.84	9.85	21.2	10.9				10.8333	7.6	6.60377
		8.08696	8.44057	5.09027	9.55	14.45	11.5	9.4	17.5	11.8				11.4583	11.2889	5.56604
		6.40994	12.2209	4.18378	16.395	14.06	12	19	29.2	16.25				8.35556	5.26316	10
		7.1	18.4477	11.055	12.115	20.725	5.5	10	18.2	11.9				3.46667	2.89474	4.6									Density					Proliferation Assay EdU incorporation
		3.145	24.8779	18.8991	10.61	7.6	11.55	9.15	10.6	8.22				4.53333	4.69298	4.64912										Number of nuclei				Sample	All nuclei	Proliferating	Ratio
		2.785	32.9924	13.0734	8.1	13.35	19.7	5.8	18.95	4.7				6.93333	7.2807	6.89076										35nm	50nm	70nm		06.08.21_sample 1_35 nm	46068	20366	0.442086
		3.145	10.52	12.7982	8.45	22.565	20.15		19.7					10.9865	6.85841	3.4									a5b1 mimetic	1839	1507	1772		06.08.21_sample 1 50 nm	45887	13203	0.287729
		3.055	13.94	19.633	6.15	21	8.7		12.55					10.4484	6.28319	5.57522			stress correlation lenght							2149	1562	2096		06.08.21_sample 1_70nm	56339	15461	0.274428
		2.875	16.2819	8.66972	4.165	15.785	12.65		12.77					6.59193	4.95575	6.6				Correlaton length (µm)						884	2035	1912
		4.945	14.75	6.06061	9.67	22.445	10.3		11.2					12.4215	6.06195	3.93805				35nm	50nm	70nm				2227	2095	1948		06.08.21_sample 2_35 nm	52914	5652	0.106815
			24.8	8.78788	7.6									12.1076	7.735	9.75			c(RGDfK)	54	61	42				2455	1539	2321		06.08.21_sample 2_50 nm	52091	6051	0.116162
			21.13	7.57576										14.03	7.285	6.65				31	68	112				2167	2608			06.08.21_sample 2_70 nm	37898	6331	0.167054
				5.15152										10.61	6.65	7				127	31	186				2923	2659
				3.30827										12.86	10.5	10.35				102	60	130				2425	2024			14.07.21_sample 1_35 nm	41506	14651	0.352985
														15.015	11.42	8.99				231	77	45				2425	2746			14.07.21_sample 1_50 nm	43980	9556	0.217281
														10.61						198	77	89				2850	1727			14.07.21_sample 1_70 nm	24503	10116	0.412847
														9.085						112	46	47
																				132	37	56
	velocity correlation lenght												velocity correlation lenght							34	53	37
		HaCaT			hKC			nHEK												225	56	101
		35nm	50nm	70nm	35nm	50nm	70nm	35nm	50nm	70nm				35nm	50nm	70nm				38	37
	a5b1 mimetic	146	306	118	400	796	296	227	351	185.9			c(RGDfK)	136	104	373				43.2	101
		303	394	93	448	354	208	128	236	197				125	79	206
		236	321	280	416	590	309	175	472	225				156	106	86
		124	412	362	121	457	496	285	541	307				138	230	160
		260	251	165	345	327	194	176	438	273				96	130	95
		113	312	143	306	494	185	218						127	137	90
		128	323.3	178	257	642	254							107	113	67
		100	635.8	140	386	382	540							380	231	157
		128	441	128	259	500	359							104	128	93
		172	463	107	440	546	435							171	183	330
		262	333.8	132	470									193	104	254
		390		125										86	331	192
		139		284										90	615	145
		565		143										406	429	157
				125										324	409	213
														476	393	129
														221.6	241	79
														340	546	579
														437		596
																614
																342
																222
																475
