# Supplementary material for: Integrin α5β1 nano-presentation regulates collective keratinocyte migration independent of substrate rigidity
Source: eLife. 2021 Sep 23;10:e69861. doi: 10.7554/eLife.69861 (PMC8460267; doi:10.7554/eLife.69861)
Supplement: Figure 2—source data 1. [file elife-69861-fig2-data1.xlsx]

## Sheet: Focal adhesion area (um2)
	35 nm					50 nm									70 nm
	Cell1	Cell2	Cell3	Cell4	Cell5	Cell1	Cell2	Cell3	Cell4	Cell5	Cell6	Cell7	Cell8	Cell9	Cell1	Cell2	Cell3	Cell4	Cell5	Cell6	Cell7	Cell8	Cell9	Cell10	Cell11	Cell12	Cell13	Cell14
FA 1	18	6.83	9.83	2.64	4.12	7.3	11.1	8.12	2.8	8.43	5.99	3.57	9.48	4.21	20.4	6.77	26.1	8.84	2.64	3	22.7	16.6	12.5	8.01	7.53	21.6	2.83	8.16
FA 2	13.7	2.62	9.73	10.4	8.18	3.32	8.97	2.93	11.5	7.54	6.85	2.91	7.26	5.92	7.38	22	5.87	11.1	2.78	9.79	6.4	3.17	5.65	21.1	4.46	14.5	7.9	3.27
FA 3	10.7	11.1	4.16	11.6	9.1	5.33	9.67	7.42	5.7	4.74	13.5	5.63	4.29	18.2	3.75	8.71	18.8	9.77	9.83	6.03	12	10.5	6.64	33.9	14.4	15.9	5.98	3
FA 4	7.77	4.1	6.08	4.99	3.37	3.34667	8.48333	5.68	2.35	4.75	3.58	7.62	6.07	7.48	17.6	6.54	10.8	4.12	9.09	5.55	6.83	5.9	13.2	6.55	4.33	17.6	8.14	7.74
FA 5	12.7	10.3	11.7	9.97	3.03	2.36167	7.76833	2.25	10.4	9.39	3.6	24.3	4.32	4.37	21.5	3.11	47.2	7.36	8.83	8.25	4.06	16.5	3.43	4.41	19.5	2.76	9.69	8.28
FA 6	15.5	9.4	31.4	4.47	4.31	1.37667	7.05333	9.11	16	12.6	5.87	8.17	4.23	8.96	6.5	2.6	35.7	7.85	2.81	2.4	5.36	40.5	12.4	14.5	22.9	34.7	9.67	5.01
FA 7	27.6	2.9	7.67	3.82	3.31	0.391666	6.33833	3.84	16.2	24.6	26.3	23	4.71	2.89	10.6	2.97	17.8	2.5	5.81	20.5	4.66	4.95	5.78	23.6	10.6	3.87	10.5	5.83
FA 8	4.83	3.9	4.91	5.54	4.61	-0.593334	5.62333	3.62	9.6	8.67	6.58	2.21	4.99	55.3	26.4	6.98	11	11.8	9.1	4.91	6.92	7.16	11.5	40.3	3.58	12.7	5.4	2.1
FA 9	11	4.47	12.7	11	3.85	-1.57833	4.90833	7.67	7.79	5.14	10.9	16.2	3.84	14.1	8.46	6.4	37.1	10.7	11.2	26.3	29.2	7.05	14.4	6.79	39.2	7.71	10	5.48
FA 10	9.54	11.4	3.67	30.9	6.81	-2.56333	4.19333	10.1	2.73	3.52	4.46	6.47	3.02	12.2	4.3	21.4	17.2	15.1	5.88	12	7.22	4.93	9.73	21.1	40.5	6.51	5.16	12.8
FA 11	26	5.44	7.28	9.56	5.61	-3.54833	3.47833	3	9.31	20.1	5.01	10.7	11.3	28.6	9.75	6.31	32.7	7.82	8.4	16.1	5.16	18.6	9.7	51.7	7.21	12.4	9.55	8.55
FA 12	7.98	10.6	8.91	8.18	3.39	-4.53333	2.76333	5.74	2.99	2.96	2.74	3.8	10.9	4.42	8.37	14.8	26	6.7	9.37	12.3	6.53	6.01	4.08	15.7	6.32	4.51	11.8	15.6
FA 13	4.97	11.6	3.06	8.32	4.87	-5.51833	2.04833	14.6	9.22	6.72	5.53	5.62	5.37	8.26	12.4	2.78	3.11	3.91	3.84	16.3	10	2.98	78.7	4.76	3.58	9.48	4.19	14.1
FA 14	8.35	3.49	8.48	3.32	6.27	-6.50333	1.33333	23.7	2.21	3.94	15.8	8.88	5.47	7.43	13.5	28	34.1	8.08	2.95	10.3	40.7	3.61	12.8	12.6	11.1	5.36	5.97	12.5
FA 15	9.39	3.52	7.1	21	6.32	-7.48834	0.618332	2.95	15.4	7.95	4.34	8.2	8.46	3.23	23.3	4.55	2.41	13.7	9.76	6.24	3.77	12.8	13.1	27.9	21.2	49.8	7.62	9.64
FA 16	11.8	3.11	4.51	22.6	3.34	-8.47334	-0.0966686	12.1	13.5	5.7	6.36	7.36	9.8	6.6	25.9	55.8	16.8	8.31	10.6	5.99	2.29	3.06	6.29	5.19	4.74	3.65	4.29	6.51
FA 17	53	7.37	5.15	18.7	6.21	-9.45834	-0.811669	3.53	9.77	2.55	11.5	25.1	3.73	18.7	18.7	6.4	22.2	12	4.82	3.15	38.7	4.64	8.89	44.7	9.47	5.47	7.74	5.47
FA 18	13.8	163	62.4	4.77	9.67	-10.4433	-1.52667	5.62	12.2	13	8.16	7.11	10.5	16.6	13.1	2.68	9.89	5.19	9.94	9.74	6.66	10.1	5.4	7.51	65.8	5.66	13.1	22.2
FA 19	38.3	10.7	26	11.4	9.68	-11.4283	-2.24167	7.98	9.87	3.52	9.74	25.2	4.92	5.83	11.7	7.16	35.9	7.21	4.95	5.66	10.3	2.3	18.1	8.93	43.3	3.85	5.92	5.83
FA 20	4.94	3.83	3.3	7.93	19.4	-12.4133	-2.95667	7.26	15.8	4.68	22.8	10.8	7.04	4.64	81.6	5.59	19.9	12.1	6.2	36.1	10.8	14.7	13.1	13.8	7.31	8.17	10.1	7.5
FA 21	4.39	3.1	13.8	7.65	5.31	-13.3983	-3.67167	4.79	10.1	16.4	18.8	3.58	6.89	11.6	14.4	4.16	12	12	3.22	12.1	3.38	44.8	9.91	10.3	5.67	90.6	4.02	37.1
FA 22	10.1	3.88	4.97	4.91	9.51	-14.3833	-4.38667	9.43	6.24	2.6	23.7	3.27	3.84	5.14	17.8	13.1	14.8	7.5	8.29	19.2	4.95	11.8	10.6	4.35	3.87	5.95	8.97	26.2
FA 23	3.41	10.7	6.12	6.47	5.56	-15.3683	-5.10167	3.14	17.4	3.33	21.8	3.16	6.54	58	6.18	20.3	23.5	4.67	6.27	4.89	4.38	2.47	71	37.4	9.83	6.9	5.58	10.7
FA 24	6.3	10.4	3.91	5.92	4.4	-16.3533	-5.81667	2.58	14.9	5.67	4.01	8.64	5.4	8.15	10.6	7.67	3.13	4.93	6.73	2.69	31.7	20.9	4.56	5.47	10.4	18	3.93	2.49
FA 25	16.7	3.32	3.76	10	8.22	-17.3383	-6.53167	3.08	5.16	6.95	6.49	25.5	3.58	23.5	8.12	13.2	12.6	7.45	7.85	10.7	13.8	9.12	13.7	39.7	6.88	5.16	8.44	29.1
FA 26	9.68	2.92	8.72	6.72	3.02	-18.3233	-7.24667	6.73	35.2	6.38	4.64	8.28	2.76	6.03	22.4	173	35.2	7.57	19.2	2.79	4.71	3.92	4.22	6.62	2.51	6.96	10.5	3.7
FA 27	12.2	4.49	11.6	6.78	8.18	-19.3083	-7.96167	6.99	18.6	2.46	5.54	3.28	10.5	6.4	3.98	6.74	2.8	13.1	5.13	13.2	4.48	15	11.3	4.19	37.8	3.35	10.2	3.81
FA 28	7.83	12.6	46	4.57	6.66	-20.2933	-8.67667	6.94	21.8	5.57	19	42.7	3.71	4.3	2.28	26.8	4.06	6.54	3.34	38.2	6.88	6.11	11.4	7.15	11.6	43.3	13.2	9.64
FA 29	5.73	9.64	5.52	4.75	7.64	-21.2783	-9.39167	3.99	14.4	16.3	6.02	6.78	9.16	4.18	17.5	37.1	13.6	11.5	3.71	5.9	3.91	3.02	23.3	13.9	8.62	6.19	4.28	3.42
FA 30	13.2	7.67	15.5	14.5	31.6	-22.2633	-10.1067	4.29	6.26	27.9	4.71	14.2	10.2	3.72	2.47	2.44	3.38	5.54	11.2	6.45	8.45	4.71	13.3	24.4	6.47	8.41	10.7	4.09
FA 31	11.1	6.72	13.4	4.63	6.91	-23.2483	-10.8217	4.67	36.1	5.09	5.54	3.12	5.66	4.18	9.92	77.9	5.91	2.54	11.9	6.28	29.2	6.12	11.3	12.3	15.7	42.2	5.47	4.37
FA 32	51.1	8.12	26.9	3.76	17.2	-24.2333	-11.5367	3.56	9.65	14.5	2.44	8.23	13.8	13	5.17	5.44	32.4	10.9	50.4	5.45	3.89	5.95	12	24.6	64.3	3.85	9.84	3.18
FA 33	27.4	14.8	10.6	4.07	6.16	-25.2183	-12.2517	3.32	4.07	2.65	25.9	4.94	3.83	4.73	8.9	5.04	35.8	8.79	13.1	15.9	10.5	14.4	69.4	9.92	5.61	6.21	12.3	3.77
FA 34	4.37	2.61	7.65	7.47	13.3	-26.2033	-12.9667	4.86	30.4	6.63	4.47	15.9	8.78	15.1	26.8	8.69	7.52	8.42	8.54	5.09	44.8	5.63	8.1	5.47	9.76	14.7	5.21	4.89
FA 35	41.4	2.66	28.8	15.9	6.02	-27.1883	-13.6817	8.63	12.3	3.73	3.62	9.05	4.13	7.39	22.8	7.36	22.9	4.58	13.6	17.9	6.53	14	7.59	22.5	14.8	15.6	5.98	7.05
FA 36	5.75	69.8	7.67	7.53	4.87	-28.1733	-14.3967	28.8	18.5	12.7	10.1	6.08	3.53	6.1	5.55	34.1	57.1	4.31	6.21	12.6	10.4	10.1	3.16	11.2	9.77	22.4	7.92	7.92
FA 37	10.2	18.8	17.8	5.8	3.01	-29.1583	-15.1117	26.8	6.33	8.5	12.9	2.55	9.42	13.6	2.31	4.8	18.4	9.02	7.96	19.8	8.07	82	17.9	38.2	6.5	3.82	8.19	5.32
FA 38	7.23	7.37	18.7	3.2	3.83	-30.1433	-15.8267	3.93	9.85	2.73	3.41	7.32	12.6	58.8	10.8	70.3	6.8	4.73	14	4.01	4.04	6.61	23.7	7.1	6.62	14	3.01	5.7
FA 39	22.3	32.9	9.92	30.3	4.88	-31.1283	-16.5417	10.8	13.2	13.1	3.49	21	6.54	10.7	19.7	12.8	20.8	8.4	5.78	10.5	4.76	15.7	12.6	15.4	13.4	3.72	10.5	2.51
FA 40	6.04	2.6	8.87	10.3	3.8	-32.1133	-17.2567	38.1	8.79	8.78	11.1	9.85	7.01	21.1	16.8	21.2	18.5	3.92	2.17	2.69	25.7	13.4	4.13	2.2	14.3	34	6	6.01
FA 41	11.2	28.2	5.82	8.51	5.81	-33.0983	-17.9717	4.56	8.63	4.76	9.01	3.84	3.71	5.88	5.09	10.8	6.8	4.33	9.86	3.5	6.77	31.9	44.2	6.09	19.1	5.55	11.4	3.81
FA 42	18.3	17.7	9.69	10.6	2.32	-34.0833	-18.6867	9.7	16	2.35	12.7	3.69	6.25	8.62	3.08	7.57	6.08	5.07	4.15	14.3	4.45	5.59	12.8	64.4	4.4	17.1	8.75	11.8
FA 43	4.09	10.5	3	8.67	2.81	-35.0683	-19.4017	25.6	4.16	12.4	5.04	2.24	4.97	2.91	5.3	8.14	23.2	2.9	5.83	10.2	6.02	4.98	6.08	27.8	16.7	7.58	4.63	10.4
FA 44	10.3	6.84	10.8	16.6	6.41	-36.0533	-20.1167	9.54	2.62	16	7.16	6.75	4.76	3.79	29.5	6.92	3.81	4.14	5.05	27.3	9	5.88	11.2	2.87	73.5	5.98	8.04	17.3
FA 45	16.6	3.14	7.35	7.31	4.57	-37.0383	-20.8317	2.98	5.41	2.19	6.96	7.01	8.05	3.4	7.46	24.1	21.4	9.62	17.3	6.53	4.36	20.3	111	10.8	6.67	11.2	8.6	6.92
FA 46	21.5	11.8	6.36	4.96	7.35	-38.0233	-21.5467	7.76	20.3	2.79	2.42	13.4	3.49	3.01	12.2	4.86	3.38	8.74	9.37	6.59	41.8	29.8	4.17	3.16	13.2	4.29	9.14	18.9
FA 47	10.5	7.06	9.63	2.95	7.08	-39.0083	-22.2617	11	9.1	2.34	8.02	25.6	7.43	8.87	16	21.1	5.29	6.91	4.94	3.35	2.55	6.03	5.5	52.9	13.2	8.65	13.7	11.2
FA 48	21.7	17.2	10.8	5.66	12.5	-39.9933	-22.9767	6.41	13.6	4.71	13.6	7.52	3.74	6.35	2.87	11.8	13.3	5.48	2.42	4	4.65	2.79	22.2	7.58	16.7	4.35	3.78	6.34
FA 49	54.9	4.49	4.29	13	8.26	-40.9783	-23.6917	7.49	21.7	12.5	5.06	2.9	11.4	13.5	9.13	17.4	3.87	4.58	40.5	4.55	3.1	4.09	27.2	4.03	10.6	9.92	5.57	3.86
FA 50	10.7	9.51	13.4	21.4	3.29	-41.9633	-24.4067	17.9	8.64	10.6	14.4	5.13	7.92	7.07	2.85	16.1	28.3	11	5.32	7.89	2.02	20.6	2.96	12.7	13.2	3.51	10.9	9.34
FA 51	13.8	6.04	5.19	4.35	20.3	-42.9483	-25.1217	4.93	28	4.09	7.46	49.5	4.9	8.87	11.4	6.92	6.36	4.59	9.72	2.86	45.4	3.73	3.17	2.37	11	3.78	4.44	2.53
FA 52	27.1	4.12	4.18	3.79	3.9	-43.9333	-25.8367	3.13	35.1	20.1	23.9	7.06	12.9	5.6	13.2	7.62	32.1	4.61	12.6	18.1	6.84	3.69	5.76	18	9.07	10.6	10.1	26.1
FA 53	8.2	3.93	6.17	11.1	15.4	-44.9183	-26.5517	6.14	6.87	9.28	30.1	4.14	10.2	4.86	4.59	4.22	49.8	6.05	3.32	12.4	9.58	5.86	35.9	43.2	3.07	99.3	12.2	5.76
FA 54	22.9	3.83	5.02	3.33	2.38	-45.9033	-27.2667	4.88	6.52	5.95	6.27	3.14	5.3	20.9	11.5	5.71	12.1	2.44	21.3	15.3	9.2	7.91	11.6	14.2	14	3.67	4.89	4.66
FA 55	10.9	9.7	2.97	7.23	8.79	-46.8883	-27.9817	5.23	12.2	10.9	3.19	14.8	4.13	53.2	19.7	5.05	7.16	2.94	6.64	4.18	4.97	21.8	4.53	25.5	32.3	4.45	5.53	15.8
FA 56	8.52	8.56	3.57	13.8	9.36	-47.8733	-28.6967	4.4	3.3	8.99	25.7	6.99	9.67	7.64	23.9	5.16	5.89	4.06	4.11	10.9	7.88	6.66	11.9	11.6	33.5	12.9	7.46	13.1
FA 57	5.08	13.8	7.5	7.51	11.2	-48.8583	-29.4117	9.03	23	3.58	5.95	10.9	3.22	15.1	9.56	3.17	2.85	3.81	14.1	3.17	2.34	84.3	5.96	3.57	8.55	28.9	6.87	4.72
FA 58	12.5	15.8	5.3	5.94	6.58	-49.8433	-30.1267	37.6	12.2	7.77	3.92	5.41	14.4	18.9	15.1	9.24	14	9.3	5.7	11.7	18.6	4.38	102	6.54	10.9	7.4	5.79	9.82
FA 59	11	5.24	4.42	5.68	8.76	-50.8283	-30.8417	4.87	27.8	5.78	24.3	26.1	7.4	5.24	17.3	10.9	13.2	3.73	3.03	25.5	6.42	17	19.4	51.1	8.89	20.1	13.7	12.7
FA 60	14.7	18.5	5.79	24.1	4.47	-51.8133	-31.5567	4.49	13.5	3.44	7.13	9.62	6.88	5.65	3.61	3.73	23.5	7.13	4.88	6.99	6.48	10.7	6.72	4.03	3.75	3.36	6.47	63.7
FA 61	23.8	3.34	11	9.12	11	-52.7983	-32.2717	2.63	6.71	3.25	12.3	2.53	4.56	12.3	9	6.96	8.43	8.32	22.5	5.22	4.27	32.5	7.33	15.4	2.12	9.64	4.62	13.6
FA 62	18.9	4.16	63.4	6.56	11.1	-53.7833	-32.9867	3.12	6.28	5.6	2.94	3.85	5.28	3.58	9.93	16.1	12.3	4.25	2.66	11.9	3.66	5.24	3.02	5.33	18	9.8	4.82	4.05
FA 63	61.1	17.5	4.07	6.44	8.47	-54.7683	-33.7017	33.9	6.15	2.35	8.14	7.14	4.64	4.19	6.62	6.92	4.34	6.18	2.59	15.5	6.41	14	2.53	48.8	2.55	6.36	2.91	6.4
FA 64	8.21	2.42	13.2	6.77	9.43	-55.7533	-34.4167	5.79	3.75	11.9	8.93	2.65	5.82	14.1	61.8	31.3	19.5	3.09	16.6	3.66	8.74	14.7	29.7	15.5	23.9	3.26	8.67	8.31
FA 65	14.1	5.67	4.48	9.46	3.57	-56.7383	-35.1317	10.8	6.11	4.83	9.24	7.49	3.02	5.21	16	8.45	6.58	5.19	10.8	5.29	2.54	11.4	8.8	13.8	23	2.35	4.28	5.24
FA 66	4.77	3.08	8.64	13	2.83	-57.7233	-35.8467	3.5	6.41	4.79	22	9.52	2.67	11.7	9.04	14.7	15.9	3.83	18.8	3.7	34.7	36	17.6	29.4	11.4	3.29	5.51	4.21
FA 67	16.1	17.5	10.2	9.65	9.01	-58.7083	-36.5617	10.4	12.6	2.97	2.55	6.72	2.24	8.16	9.23	2.52	5.49	8.71	6.94	21.2	3.78	6.17	17.3	7.12	54.9	2.84	8.15	4.96
FA 68	15.8	8.24	5.2	14.3	3.42	-59.6933	-37.2767	8.48	4.43	3.76	8.93	4.03	5.62	4.75	6.86	4.8	24.5	4.65	19.7	12.2	2.49	2.52	7.83	15.4	5.58	38.2	8.86	3.49
FA 69	10.6	9.39	6.76	9.95	4.4	-60.6783	-37.9917	3.3	35.3	3.79	7.58	3.28	2.85	7.93	14.7	8.35	5.58	3.02	2.88	13.7	38.1	2.54	4.1	3.83	16.5	3.09	9.94	3.56
FA 70	20.3	4.95	4.28	6.78	2.94	-61.6633	-38.7067	6.76	11.3	4.78	9.97	2.94	11.9	6.19	137	4.17	26.8	9.47	2.57	5.78	6.74	3.52	12.2	13.4	59.9	4.28	12.8	10.1
FA 71	6.82	10.6	10.2	12.9	4.4	-62.6483	-39.4217	11.7	11.2	2.23	13.2	10.2	7.65	4.05	5.77	4.59	4.26	2.88	15.2	5.16	8.37	13.9	21.6	36.7	6.2	14.4	2.54	7.74
FA 72	20.9	7.82	5.44	6.03	12.1	-63.6333	-40.1367	5.67	14.2	8.41	3.26	4.96	3.53	2.47	26.8	19.9	47.8	2.59	9.77	7.52	10.2	29.4	6.67	5.52	8.19	4.97	10.6	4.86
FA 73	10.9	29.1	11.2	5.85	5.47	-64.6183	-40.8517	10.8	17.3	7.04	17.8	16.4	11.9	28.1	6.33	22	8.11	4.8	12.4	3.67	6.31	2.66	6.55	13.1	19.7	6.32	5.07	7.36
FA 74	14.7	13.4	43.2	2.9	2.4	-65.6033	-41.5667	4.22	18.9	19.3	5.35	23.6	10.1	48	15.4	7.95	13.4	4.59	2.79	23.6	4.81	7.77	119	5.07	7.36	3.02	9.8	3.84
FA 75	20.1	55	14.9	27.7	2.85	-66.5883	-42.2817	18.8	13	5.04	20.8	8.77	5.17	14.3	7.13	7.43	3.26	6.02	12.3	11.8	3.73	13.8	2.81	32.7	43.6	12.4	5.67	4.85
FA 76	15	3.71	16.5	3.09	3.22	-67.5733	-42.9967	11.1	8.61	16.7	25.5	7.38	4.48	9.76	8.34	5.63	5.72	4.87	6.34	26.7	7.67	81.2	4.85	15.5	3.53	8.56	13	12.1
FA 77	16.8	33.4	17.1	3.51	4.66	-68.5583	-43.7117	11.7	9.26	8.68	7.18	4.59	6.7	31	17.2	9.01	4.56	5.37	4.67	4.16	5.93	2.99	4.29	13.2	14	8.3	4.94	9.27
FA 78	4.51	10.1	18.9	14.2	6.71	-69.5433	-44.4267	4.39	18.5	11.2	5.18	5.53	3.98	3.97	13.4	7.17	21.6	9.25	22.1	5.94	3.68	15.8	24.9	36.7	12.8	34.2	7.61	18
FA 79	49.5	8.32	4.82	25.2	4.72	-70.5283	-45.1417	22.8	7.99	2.82	2.9	39.4	10.9	5.98	6.02	338	13.9	4.14	3.36	4.17	6.15	8.99	2.96	19.2	58.9	7.15	5.76	13.4
FA 80	7.05	22.6	5	7.13	5.12	-71.5133	-45.8567	15	45.4	8.07	3.16	4.89	6.17	5.2	9.77	6.57	3.16	4.66	3.14	4.83	9.2	33.7	10.8	3.57	10.9	9.02	7.74	21.3
FA 81	5.4	20.1	13.1	5.29	3.35	-72.4983	-46.5717	10.9	21.5	5.99	8.96	4.2	6.68	6.98	27.7	5.63	6.03	4.58	6.02	7.11	6	13.9	11.1	15.1	67.9	2.38	13.6	11
FA 82	13.9	6.14	11	8.51	4.59	-73.4833	-47.2867	3.86	18	3.52	21.3	5.61	3.98	11.8	6.72	7.14	7.07	2.99	2.45	2.92	25.4	45.1	11.2	33.8	15	110	10.4	6.26
FA 83	50	9.67	6.24	5.49	6.31	-74.4683	-48.0017	3.53	14.9	12.5	2.58	3.18	6.3	3.29	13	102	5.27	3.73	51.9	26.6	36.2	10.3	2.8	5.43	13.6	8.66	7.03	8.24
FA 84	11.8	6.08	19.9	13.5	18.9	-75.4533	-48.7167	3.41	67.3	5.44	10.2	24.8	4.22	15.6	10.1	11.9	8.78	8.97	8.55	11	4.2	6.04	12.2	3.07	3.2	12.2	10.5	16.1
FA 85	18.7	4.11	8.19	27.1	9.62	-76.4383	-49.4317	15.2	14.2	18.5	12.2	9.32	4.95	8.69	10.4	19.7	10.2	4.78	3.37	15.7	2.32	2.33	19.9	16.5	46.6	47	5.05	3.52
FA 86	2.95	5.95	2.74	7.1	8.35	-77.4233	-50.1467	4.68	29.7	10.4	9.17	6.07	2.75	6.42	4.71	8.72	20.8	3.57	20.7	4.49	11.4	7.15	17.5	5.45	11.7	20.5	5.12	6.32
FA 87	21.9	4.48	7.72	7.58	6.44	-78.4083	-50.8617	18.7	30.9	6.59	6.3	15.1	4.67	3.32	91.8	45.7	5.73	3.81	5.99	3.98	28.7	5.49	9.81	43.7	4.82	8.37	2.97	14.7
FA 88	8.05	3.19	9.63	13.6	4.51	-79.3933	-51.5767	5.57	28.6	4.22	6.58	15.9	3.09	25.4	6.96	6.47	26.5	4.65	6.31	2.8	6.86	3.29	3.66	13.7	13.8	27.6	7.47	5.2
FA 89	10.5	6.45	9.52	20.7	2.3	-80.3783	-52.2917	7.89	6.22	11.5	4.31	3.79	4.74	48.5	10.5	50.8	3.75	4.39	19.8	22.6	8.47	6.52	17.6	14.1	49.4	48	4.49	4.82
FA 90	8.87	2.42	4.02	7.4	11.1	-81.3633	-53.0067	5.38	9.49	7.42	7.01	18.9	6.24	2.95	5.25	10.4	18.3	5.25	3.69	12.7	10.2	14.4	2.72	31.9	13.7	5.4	4.72	4.6
FA 91	11.9	13.3	9.57	12.9	11.6	-82.3483	-53.7217	7.53	14.1	8.13	8.07	11.1	5.6	18.7	28.3	25.5	50.4	6.48	3.99	25.2	5.51	3.99	4.06	4.2	62.8	7.67	8.09	3.72
FA 92	17.3	10.7	7.2	8.49	8.45	-83.3333	-54.4367	35.5	11.1	7.08	8.22	7.34	12.1	5.95	28.9	4.55	7.76	4.54	9.38	2.82	5.03	5.82	6.54	13.9	13.9	4.14	8.43	24.6
FA 93	13.9	3.49	8.86	7.7	24.3	-84.3183	-55.1517	2.61	13.2	4.74	4.54	4.26	9.86	4.05	3.66	48.8	3.03	3.24	5.82	8.6	2.68	23.7	2.78	7.01	13.4	5.03	12.1	17
FA 94	25	3.64	10.9	4.9	3.69	-85.3033	-55.8667	2.13	16.3	6.71	22	3.67	5.68	6.56	7.95	2.74	11.4	5.57	10.9	6.92	6.45	6.01	10	5.67	5.01	24.8	9.71	53.8
FA 95	37.5	28.7	10.8	5.23	8.76	-86.2883	-56.5817	2.28	2.83	2.29	18.6	2.39	3.79	8.93	3.32	16.5	2.7	3.52	20.5	4.58	7.62	57.8	12.6	33.6	64.4	14.7	3.45	31.8
FA 96	8.89	8.13	8.2	5.12	38.2	-87.2733	-57.2967	5.56	7.04	4.41	3.87	2.31	7.24	13.4	9.1	2.69	15.2	5.31	7.44	7.83	12.1	4.06	5.73	4.62	7.96	8.04	11.2	8.93
FA 97	4.37	3.77	4.76	5.16	5.31	-88.2583	-58.0117	2.97	3.78	7.49	18.8	10.2	4.32	3.03	8.19	2.83	29.3	2.13	2.42	42.2	5.59	4.74	13	17.8	9.21	5.36	4.85	6.84
FA 98	12.9	3.57	4.14	4.07	16.6	-89.2433	-58.7267	3.36	5.9	5.55	24.5	13.6	12.6	6.45	3.29	23.2	4.04	2.33	7.47	15.8	24.5	13.9	17	6.36	23.4	7.5	9.77	2.58
FA 99	27.4	9.04	7.7	5.42	3.83	-90.2283	-59.4417	2.64	23.2	8.42	3.18	23.1	4.64	6.5	37.6	5.1	7.09	4.83	5.47	5.17	32.4	22.9	15.3	32.2	10.7	5.6	4.79	6.91
FA 100	15	5.04	5.61	4.12	5.55	-91.2133	-60.1567	3.57	8.46	7.79	2.9	18.5	7.11	8.42	6.7	2.56	10.5	5.39	9.42	7.23	4.54	5.47	5.46	10.7	6.17	4.87	13.1	8.03
FA 101	17.3	2.96	14.1	7.37	6.62	-92.1983	-60.8717	5.87	13.5	5.51	8.97	7.16	4.25	4	9	16.7	14.4	2.75	5.71	2.73	3.09	15.1	2.8	16.6	33.5	3.41	4.66	6.85
FA 102	4.5	52.7	6	2.97	7.17	-93.1833	-61.5867	3.92	3.9	11.6	5.6	4.09	4.77	4.71	11.2	4.77	19.9	4.3	2.2	62.6	8.64	25.4	17.6	30	42	28	7.47	3.36
FA 103	16.5	12.6	7.91	3.65	2.83	-94.1683	-62.3017	7.91	8.22	4.69	4.16	32.7	4.87	9.14	23.6	10.6	6.27	3.3	49.8	2.34	26.4	22.1	4.45	12.4	3.96	2.82	7.93	10.2
FA 104	5.31	4.36	4.76	3.97	5.86	-95.1533	-63.0167	12.8	20.8	10.6	10.3	2.59	5	6.87	15.2	5.3	34.1	4.13	5.39	8.11	16.9	36.6	2.47	8.89	3.82	3.8	16.5	4.62
FA 105	6.58	76.3	77.3	7.02	5.7	-96.1383	-63.7317	13.9	14.1	4.57	7.31	3.28	3.49	25.8	10.5	28.7	5.2	3.76	14.2	3.84	11.2	10.8	2.41	6.37	21.4	20.4	10.6	3
FA 106	10.8	9.51	13.4	15.2	10.6	-97.1233	-64.4467	11.1	11.3	9.57	4.35	24.5	5.82	38.9	5.91	30.9	6.59	5.5	25.3	3.91	3.68	5.37	11.7	29.5	8.1	8.85	7.93	5.48
FA 107	16.4	40.3	2.23	9.87	3.83	-98.1083	-65.1617	14.3	24.6	5.23	2.96	3.67	2.74	7.67	3.13	5.51	18.4	5.55	4.58	3.47	4.9	6.66	15.7	9.44	7.05	5.7	10.9	12.1
FA 108	16.3	9.16	12.2	31.6	3.6	-99.0933	-65.8767	12.1	12.9	5.61	3.69	4.25	5.41	3.17	24.8	12.6	47	4.9	24.4	42.1	3.95	10.5	13.1	6.97	3.1	5.43	4.16	6.19
FA 109	13.8	3.54	3.58	3.55	4.16	-100.078	-66.5917	4.44	13.9	9.04	9.38	23.7	7.01	15.5	11.6	7.32	6.11	6.06	2.4	17	17.6	7.46	6.5	6.73	27	4.1	4.8	17.2
FA 110	47.5	3.53	19.9	43.3	7.65	-101.063	-67.3067	2.38	17.8	13.3	4.15	14	6.35	5.78	13.2	8.15	6.79	2.65	4.47	6.47	3.89	6.99	15	34.8	8.88	7.99	2.38	11.6
FA 111	7.46	10.2	10.3	7.37	4.29	-102.048	-68.0217	9.94	6.19	6.51	10.6	6.78	6.25	4.01	4.84	2.26	14.3	5.2	13.5	4.01	7.59	3.98	9.37	4.94	7.02	19.1	7.15	19.8
FA 112	5.37	4.33	12.3	8.86	6.64	-103.033	-68.7367	13.9	8.16	2.76	4.06	8.33	12.3	6.78	25.1	14.1	40	3.3	8.62	26.3	3.7	7.15	19.2	11.3	4.12	5.23	4.28	13.8
FA 113	4.82	4.13	3.44	6.59	9.27	-104.018	-69.4517	19.6	6.15	3.41	10.3	5.61	2.52	3.68	7.98	21.5	9.6	4.8	6.14	7.52	8.44	17.6	5.22	15	19.3	30.9	4.46	4.67
FA 114	4.25	15.4	10.7	5.36	4.76	-105.003	-70.1667	25.1	15.3	13.1	7.32	19.7	9.69	17.4	4.75	12.3	8.49	5.18	8.43	3.24	35	62	23.4	15.4	28.5	5.7	7.08	5.28
FA 115	35.9	7.86	14.2	11.5	4.83	-105.988	-70.8817	13.8	5.87	5.65	2.73	8.51	8.39	7.08	13.1	7.02	10.9	13.1	13.9	43.5	31.7	22.3	2.24	20.3	14.2	7.46	8.22	8.83
FA 116	8.94	7.27	16.7	6.35	20.8	-106.973	-71.5967	5.71	8.97	17.3	3.74	17.9	3.64	4.35	5.91	83.7	5.87	2.71	7.02	16.5	5.35	9.73	4.45	12.8	8.9	7.77	8.42	4.98
FA 117	16.2	3.15	4.34	2.28	14.4	-107.958	-72.3117	17.3	12.7	7.53	6.15	5.19	5.67	6.63	40.4	3.17	12.5	2.78	4.4	4.01	4.37	7.47	16.2	8.34	7.68	5.58	10.1	5.77
FA 118	3.67	4.61	43.3	5.29	3.8	-108.943	-73.0267	11.1	6.83	2.84	2.62	4.72	3.38	7.78	8.57	17.1	12.7	7.57	7.16	5.82	6.99	10.1	13.7	8.03	14.7	99.1	2.59	8.9
FA 119	8.56	15.3	10.2	6.93	6.28	-109.928	-73.7417	5.72	24.8	4.02	2.58	3.33	10.8	5.38	17.6	31.4	16.7	2.42	5.14	13.7	2.95	24.5	20.4	29.3	56.5	6.27	10.8	4.98
FA 120	3.7	2.42	5.44	5.46	9.93	-110.913	-74.4567	2.41	13.2	4.03	3.43	3.08	3.08	4.6	70.7	10.5	16.8	6.98	8.56	2.58	22.7	20.8	6.28	8.69	4.36	37.1	3.78	3.2
FA 121	5.88	11.2	14.2	4.34	2.59	-111.898	-75.1717	39.9	3.87	8.56	12.8	14.7	5.92	5.25	47.4	4.71	6.54	5.85	6.69	25.5	16.1	64.3	21.9	4.63	5.08	18.9	9.67	51.3
FA 122	9.7	6.18	5.12	5.04	12.1	-112.883	-75.8867	4.4	16	4.17	3.51	16.5	4.3	27.8	25.9	5.97	11.2	3.4	33	4.87	3.77	7.88	8.83	6.99	16.3	6.76	12.6	33.7
FA 123	8.04	3.73	8.55	4.62	6.22	-113.868	-76.6017	5.76	11.5	2.47	3.96	22.8	4.41	37.6	5.71	5.16	2.58	11	15.1	7.05	11.1	13.7	7.45	6.64	6.7	29.9	4.04	17.1
FA 124	11.2	2.75	6.97	9.36	4.82	-114.853	-77.3167	8.35	12.1	12.3	8.55	7.09	4.35	4.83	5.92	10.2	39.8	3.53	5.72	13.5	4.24	5.4	25.6	10.5	4.71	42.1	3.13	14.4
FA 125	14.4	8.92	7.75	2.95	5.31	-115.838	-78.0317	9.53	13	3.76	5.43	28.7	3.05	21.1	52.7	25.4	8.84	3.67	5.33	2.74	4.64	4.52	4.64	59.6	24	3.59	6.32	13.6
FA 126	15.6	15.4	5.08	4.48	6.9	-116.823	-78.7467	15.8	15.3	6.18	3.27	7.35	7.49	3.52	3.45	4.3	7.38	6.35	5	31.4	2.48	10.3	3.37	12.6	3.4	6.32	8.09	3.65
FA 127	13.2	111	15	8.16	8.29	-117.808	-79.4617	4.74	14.5	12	20.1	39.1	4.72	2.89	8.99	9.62	4.4	4.01	26.5	14.7	4.54	18.2	8.96	7.1	6.7	3.22	17.8	3.51
FA 128	38	4.06	16.8	2.95	10.8	-118.793	-80.1767	7.06	6.86	2.74	21.3	2.99	5.29	8.64	24.7	5.22	26.9	3.07	5.52	3.44	11.1	12.6	3.86	18.3	3.14	6.69	5.09	10.2
FA 129	9.71	7.55	12.1	3.78	6.65	-119.778	-80.8917	3.23	16.1	7.46	15.6	32.7	6.67	6.13	25.7	15.9	11.8	3.4	21.7	14.3	9.2	65.6	7.91	11.5	3.71	23.6	9.25	5.29
FA 130	9.36	7.46	18.2	4.27	11.5	-120.763	-81.6067	8.71	11.6	7.44	25.1	3.54	6.35	3.34	2.37	3.46	7.32	6.11	7.09	38	7.63	15.8	30.8	6.5	20.7	12.6	10.5	4.59
FA 131	3.98	5.4	6.93	22.5	4.09	-121.748	-82.3217	14.2	14.9	5.05	3.54	10.1	4.7	4.33	8.38	4.36	13.7	3.64	9.32	5.21	32.4	4.09	8.23	10.3	24.5	14.6	3.5	3.01
FA 132	35.9	5.72	5.9	3.52	10.6	-122.733	-83.0367	4.53	3.25	3.55	5.07	8.56	8.11	10.3	19.9	3.01	14.1	4.7	8.55	6.99	3.7	4.97	3.46	28.4	9.76	46.4	5.71	7.11
FA 133	5.28	5.87	9.97	3.42	37.9	-123.718	-83.7517	3.64	35.1	3.02	3.56	12.8	8.24	16.7	13.9	11.3	11.1	3.31	6.02	42.8	35.5	9.09	20.6	6.07	5.85	3.43	3.73	4.46
FA 134	9.61	5.66	4.32	3.52	2.61	-124.703	-84.4667	5.6	23.3	4.37	4.63	5.49	8.28	6.94	5.54	9	21.3	6.17	7.69	17	4.38	15	7.51	8.49	13.7	21.4	7.82	4.7
FA 135	15.8	36.8	6.99	6.08	12.1	-125.688	-85.1817	11.1	11.6	4.92	9.05	30.9	9.91	5.05	9.56	7.02	7.88	3.45	4.66	5.35	3.81	19.4	8.87	6.35	45.2	5.47	3.8	3.24
FA 136	6.54	7.7	20.1	3.64	4.36	-126.673	-85.8967	10.6	9.07	5.27	12.1	22.2	3.93	3.88	50.8	187	11.1	4.31	20.6	8.2	12.6	79.3	21.3	8.09	4.41	12.4	4.91	7.61
FA 137	16.9	46.5	25.1	3.86	26.1	-127.658	-86.6117	2.43	16.4	10.9	6.18	7.32	4.97	6.61	12.4	10.2	2.68	3.61	11.1	44.6	3.74	6.57	4.61	4.74	6.31	6.92	7.53	4.17
FA 138	7.94	5.97	9.95	3.48	10.4	-128.643	-87.3267	11.7	2.85	4.18	5.77	11.4	11.5	75.6	5.62	32.2	35.9	4.74	6.65	6.66	34.4	13.6	4.3	40.7	9.17	18.7	7.81	9.38
FA 139	6.42	3.46	8.54	2.67	5.43	-129.628	-88.0417	21.5	55.4	2.82	4.4	5.79	2.75	5.67	4.09	7.73	6.98	3.86	6.44	7.61	8.45	5.1	9.45	10.4	22.1	24.5	8.5	9.22
FA 140	7.11	13	8.48	10.5	4.66	-130.613	-88.7567	11.5	9.05	3.14	6.89	4.26	9.81	18.8	9.05	2.51	7.83	4.8	9.04	4.13	15.1	4.77	7.58	13.9	3.52	6.03	8.8	3.96
FA 141	9.34	5.22	7.78	2.95	4.86	-131.598	-89.4717	13	8.6	7.99	6.85	3.51	4.47	3.2	4.47	3.55	8	4.1	3.51	9.02	12.7	2.53	119	5.13	31.6	6.31	2.48	11
FA 142	19.2	4.63	11.2	16.8	3.14	-132.583	-90.1867	11	3.36	3.18	8.17	4.11	5.4	4	7.54	7.02	26.2	4	5.06	3.42	4.95	9.16	2.73	8.48	6.88	8.71	2.68	3.95
FA 143	24.6	9.48	6.21	15	2.31	-133.568	-90.9017	4.28	37.1	2.87	8.28	2.92	4.33	5.62	6.01	9.02	6.16	7.8	6.29	17.9	14.5	36.5	7.06	3.8	25.9	3.44	9.29	4.98
FA 144	15	5.37	3.42	7.71	5.27	-134.553	-91.6167	14.6	11.4	5.4	7.52	5	4.46	4.06	7.48	8.27	12.3	4.59	32.9	7.78	5.19	10.8	9.64	18.5	10.7	2.8	4.85	5.31
FA 145	45	30.4	4.71	4.21	3.8	-135.538	-92.3317	7.37	4.49	4.54	3.5	23.5	5.85	8.75	5.37	135	12.5	3.96	2.31	18.4	4.03	15.4	13.5	10.5	13.7	95.2	10.5	11.9
FA 146	10.7	2.5	7.48	11.9	4.76	-136.523	-93.0467	3.3	8.58	3.24	6.75	5.7	4.87	2.97	4.54	22.3	35.5	3.71	26.3	6.91	8.34	4.34	6.56	5.79	20.8	12.8	4.27	7.34
FA 147	5.08	9.89	4.35	9.52	6.38	-137.508	-93.7617	4.76	16.6	4.5	3.43	17.7	6.13	10.2	8.59	3.6	26.8	4.04	10.4	13.8	11.9	26.8	8.64	11.5	2.54	6.61	12.6	3.3
FA 148	14.9	5.13	6.6	7.28	9.78	-138.493	-94.4767	12	10.1	8.44	7.15	6.8	6.37	5.18	34.2	3.87	6.81	5.5	6.61	43.1	28.7	18.5	8.54	29.1	12.4	2.68	6.33	20.5
FA 149	39.7	8.26	15.2	4.31	17.8	-139.478	-95.1917	7.77	13.5	3.96	5.03	3.53	5.19	4.05	7.18	41	3.55	5.55	29.8	5.65	3.27	7.29	17.5	5.86	40.2	4.06	8.76	15.2
FA 150	22.1	3.88	3.01	3.15	5.3	-140.463	-95.9067	21.6	11.7	12	7.95	4.03	4.08	5.04	7.23	5.59	3.92	2.26	5.78	4.76	5.88	7.32	3.19	5.44	3.16	26.7	15.7	10.7
FA 151	14.6	9.97	12.8	3.95	2.4	-141.448	-96.6217	13.7	2.89	2.41	5.92	6.91	4.45	6.8	3.16	34.4	36.1	3.63	8.41	3.29	4.63	5.44	28.9	5.99	4.61	3.01	5.5	9.53
FA 152	8.64	11.9	58.8	3.88	3.34	-142.433	-97.3367	7.3	6.39	18.4	18.1	48.5	8.42	4.76	24.7	6.93	10.1	2.13	24.2	2.81	2.42	46.5	7.76	7.51	8.54	3.19	11.2	14
FA 153	8.4	9.07	7.55	3.57	7.82	-143.418	-98.0517	33.9	14.3	7.78	14.1	3.6	8.7	6.83	16.6	5.31	13.6	6.15	4.01	31.4	8.7	57.5	8.26	7.31	6.89	7.49	10.8	4.67
FA 154	12.8	22	12.4	5.27	12.6	-144.403	-98.7667	7.58	7.9	10.7	23.3	3.01	10.1	8.39	10.1	12.2	2.67	4.05	14.3	21.2	6.59	7.12	2.52	6.83	7.5	28.4	3.45	5.16
FA 155	4.94	10.6	12.6	6.1	18.1	-145.388	-99.4817	7.43	16.4	2.99	5.64	22	2.89	22.3	20.8	12.3	16.5	8.78	8.5	3.36	11.6	11.9	6.61	57.5	20.5	18.5	6.6	7.4
FA 156	7.25	5.13	2.22	2.53	4.14	-146.373	-100.197	4.61	6.53	7.76	13.7	5.21	3.85	38.9	18.8	5.44	3.91	8.49	7.78	44.8	5.35	4.87	100	8.64	12.1	7.64	4.81	24.8
FA 157	4.56	4.66	6.96	3.14	4.84	-147.358	-100.912	6.82	7.64	11.7	11.1	5.72	12.1	5	4.12	18.2	12.7	3.15	5.87	3.08	34.3	4.17	7.53	6.17	4.38	3.05	6.38	4.07
FA 158	9.4	8.23	29	14.9	2.95	-148.343	-101.627	12	2.15	3.18	5.26	4.85	3.26	4.18	17.2	12.4	11.7		18.9	4.97	11.7	2.49	6.11	23.2	3.97	9.61	3.77	18.8
FA 159	12.5	2.53	5.5	5.27	6.1	-149.328	-102.342	18	10.1	4.96	6.87	5.65	3.15	18.6	4.33	7.71	15.4		7.01	12.4	13.5	13.9	8.91	7.95	23.7	15.2	4.1	2.77
FA 160	13.3	5.56	8.54	4.01	10.8	-150.313	-103.057	2.87	13.1	3.07	4.55	9.46	10.4	3.51	7.08	14	31		4.47	3.47	3.17	34.9	5.06	10	6.57	5.92	7.88	6.89
FA 161	14	5.62	18.5	22.9	3.73	-151.298	-103.772	6.55	27.6	5.36	3.43	16.6	4.45	6.81	4.21	2.31	3.46		10.1	3.27	12.1	2.66	12.1	10.4	5.7	3.54	8.34	3.97
FA 162	14.1	22.7	2.58	8.87	3.76	-152.283	-104.487	3.71	11.7	2.86	10.1	3.39	4.92	7.66	10.1	8.93	10.5		8.27	32.9	10	3.25	5.4	5.75	11.1	2.86	8.24	53.7
FA 163	38.4	3.35	6.85	5.09	11.4	-153.268	-105.202	6.75	26.9	4.84	2.37	8.75	5.5	10.4	23.9	8.59	2.63		4.91	17.3	13.9	5.67	8.43	11.2	8.18	5.88	7.74	29.3
FA 164	10.9	10.7	4.52	7.31	11	-154.253	-105.917	11	10.5	3.1	12.8	17.2	4.17	13.1	8.64	4.49	7.85		6.62	3.83	6.52	24.9	8.64	30.5	28.8	30.3	2.83	28.9
FA 165	6.78	3.27	6.03	2.98	3.91	-155.238	-106.632	3.88	12.5	3.79	8.7	5.25	2.67	4.28	24.3	2.73	33.2		33	3.73	8.65	14.4	15.7	6.46	49.6	17.5	8.74	11.3
FA 166	17.5	6.49	6.67	20.4	2.82	-156.223	-107.347	3.45	4.55	5.89	10.2	10.6	2.66	4.3	7.26	14.2	4.4		23.5	3.93	2.32	4.77	5.95	2.96	20.8	10.3	4.27	12.9
FA 167	17.7	4.77	4.06	12.5	3.81	-157.208	-108.062	5.05	14.6	4.27	5.95	4.78	12	8.96	14.4	29.2	9.98		10.3	3.63	5.88	27.9	29.5	5.12	8.72	5.31	11.3	7.58
FA 168	28.9	5.04	8.65	9.06	3.82	-158.193	-108.777	6.01	16.9	21.7	3.03	3.52	6.58	3.21	31.7	3.07	14.6		36.2	3.43	2.41	28.8	8.43	13.2	7.68	7.04	12	3.26
FA 169	7.91	6.89	39.1	4.07	7.2	-159.178	-109.492	6.11	22.2	8.77	7.35	3.8	4.99	7.37	39.7	4.8	4.87		25.4	5.02	7.44	10.4	4.83	8.37	7.13	20.9	3.98	6.39
FA 170	12.7	28.1	10.5	3.47	14.9	-160.163	-110.207	9.98	4.84	4.76	4.34	6.7	4.89	7.5	47.9	8.6	9.14		32.8	57.2	7.82	3.37	110	33.3	8.23	4.29	6.21	3.47
FA 171	6.42	6.4	13.8	7.43	2.28	-161.148	-110.922	17.1	5.27	18.2	8.31	2.43	3.29	17.3	4.38	14.9	3.48		9.88	6.42	5.22	9.76	8.26	3.89	15.6	22.5	8.2	6.06
FA 172	12.4	11.7	2.71	26.9	7.39	-162.133	-111.637	6.57	14.2	2.96	6.83	7.23	4.51	37	6.04	19.1	30.9		8.46	4.28	6.79	24.9	14.9	19.2	5.18	2.65	15.4	5.38
FA 173	4.49	11.8	8.57	12.2	23.5	-163.118	-112.352	7.58	10.5	16.6	25.3	27.3	9.05	19.2	14.2	2.4	6.51		4.89	31	5.69	25.2	14	7.24	6.45	7.15	5.64	3.95
FA 174	10.8	9.36	3.95	6.71	13.9	-164.103	-113.067	7.42	4.15	7.33	5.77	16.8	8.38	2.31	21.7	8.33	27.7		6.31	20.3	45.4	7.86	4.79	6.68	4.87	8.43	11.2	4.97
FA 175	9.7	35.7	15.1	5.88	3.22	-165.088	-113.782	4.63	22.3	3.39	8.44	5.8	9.48	2.29	18.3	15.7	9.16		15.7	7.41	10.1	11.9	5.66	21.3	6.04	9.4	9.8	6.08
FA 176	13.1	54.5	9.32	6.63	5.93	-166.073	-114.497	3.71	4.99	6.3	9.42	3.05	4.17	5.8	40.3	9.21	24		7.63	42.9	13.3	4.08	8.66	7.31	41.8	69.8	3.91	6.53
FA 177	16	13.2	5.37	2.44	5.13	-167.058	-115.212	5.89	2.82	4.75	3.21	6.15	4.35	9.51	97.3	16.8	3.13		7.48	3.05	11.7	3	8.01	17.6	9.59	13.8	6.46	3.57
FA 178	12.4	19.7	6.45	10.1	5.13	-168.043	-115.927	32	3.26	10.2	3.72	2.45	11.3	10.6	12.8	5.5	13.1		6.33	2.99	7.93	33.4	22.9	6.07	2.47	5.08	5.05	5.61
FA 179	40.3	5.13	9.66	7.27	6.22	-169.028	-116.642	4.07	15.1	9.7	4.29	39.7	5.29	18.5	62	3.81	3.3		2.85	5.2	15	16.6	5.69	11.6	49.3	4.41	6.05	11.5
FA 180	8.18	41.2	5.23	3.26	22.5	-170.013	-117.357	21.3	5.65	8.96	5.53	11.8	9.66	5.67	18.3	5.74	5.82		3.22	5.38	4.67	3.28	23.8	36.8	8.11	9.46	4.32	12.1
FA 181	18.7	2.92	14.5	15.6	5.94	-170.998	-118.072	4.77	6.54	3.67	4.57	4.51	5.12	8.17	13.1	3.18	8.69		6.88	3.12	8.57	5.66	8.44	5.28	30.7	5.83	7.29	18.4
FA 182	38.9	8.89	9.04	9.34	6.9	-171.983	-118.787	5.61	3.09	4.33	4.11	4.88	4.8	7.21	11.9	45.2	8.97		31.5	30.8	8.98	15.2	10	5.93	11.9	12.1	8.82	3.94
FA 183	7.03	12.5	4.6	4.15	3.89	-172.968	-119.502	4.12	4.13	11.6	10.9	9.43	3.9	7.21	12.9	7.77	25.3		2.47	5.1	7.16	26.1	5.06	17.8	7.5	34	7.59	8.16
FA 184	11.3	23	4.54	32.5	16.8	-173.953	-120.217	36.1	12.3	6.03	6.73	4.27	3.37	23.7	12.7	6.19	7.73		12.7	7.09	2.53	16.6	86.6	3.15	11.8	3.14	2.86	7.43
FA 185	7.91	7.45	10.5	57.4	10.8	-174.938	-120.932	12.3	12.6	17.6	5.52	26.6	12.8	44.3	13.5	16.8	10.4		60.4	15.7	5.02	9.5	10.3	43.5	9.04	9.28	8.23	8.49
FA 186	5.01	6.03	10.2	15	5.76	-175.923	-121.647	4.98	5.49	5.26	3.05	4.13	7.29	11.5	18.2	3.94	5.52		5.03	4.32	2.56	6.76	3.94	10.8	6.32	8.78	2.96	14.5
FA 187	4.55	5.39	10.2	5.04	3.53	-176.908	-122.362	6.75	8.86	4.1	4.12	13.8	3.61	2.37	3.47	8.24	22		23.9	2.64	11.6	24.1	17.1	7.5	18.4	18.4	10.9	9.49
FA 188	10.8	3.35	2.62	8.9	7.11	-177.893	-123.077	4.85	14.8	3.8	7.95	5.37	4.33	4.04	9.6	5.61	10.6		24.7	64	8.85	10.1	13	6.16	5.76	19.2	4.19	9.72
FA 189	15	4.54	6.33	9.2	8.43	-178.878	-123.792	4.55	13.3	19.9	3.82	2.75	3.12	3.12	4.74	3.76	6.71		8.82	28.4	8.3	9.71	4.39	16.3	4.66	3.91	12	18.6
FA 190	17.4	3.8	4.82	3.8	9.5	-179.863	-124.507	17.2	15.9	3.06	4.66	9.31	3	5.89	3.93	8.97	3.6		13.4	9.8	3.45	2.51	4.25	6.09	3.58	5.79	5.25	5.69
FA 191	17.6	5.54	8.41	2.42	3.68	-180.848	-125.222	6.52	10.9	7.53	25.5	16.3	9.28	5.94	7	3.02	10.4		5.61	18.1	44.5	3.04	9.42	27.2	13.9	18	2.71	18.4
FA 192	22.5	18.7	19.1	4.26	7.1	-181.833	-125.937	4.3	9.4	4.1	3	6.03	7.85	7.8	4.01	2.91	13.2		7.65	4.47	10.2	8.58	7.59	4.54	5.46	4.9	7.5	4.48
FA 193	31.2	5.53	4.5	6.78	7.16	-182.818	-126.652	17.8	3.28	9.97	3.86	4.16	9.65	19.4	21.4	18.4	4.85		6.78	58.8	13	4.32	25.4	9.39	6.1	3.64	14.7	3.31
FA 194	5.37	7.27	8.55	3.29	4.95	-183.803	-127.367	3.45	16.3	3.97	2.82	11.4	3.65	5.4	19.9	5.26	26.3		9.29	3.22	12	16.9	5.75	33.1	8.3	3.02	5.15	3.76
FA 195	3.51	25.2	6.12	5	6.8	-184.788	-128.082	21.1	11.9	8.02	13.1	6.69	2.82	3.76	2.89	4.25	8.65		2.8	28.7	4.03	2.93	11.7	4.88	25.8	29.4	12.2	8.54
FA 196	4.14	9.58	3.67	8.74	5.1	-185.773	-128.797	7.92	13.1	10.9	5.69	5.42	2.71	7.35	12.2	102	9.93		5.14	9.7	5.16	28.3	49.1	6.43	45.3	4.78	9.72	41.2
FA 197	35.6	13.3	4.12	7.12	9.17	-186.758	-129.512	25.8	8.92	6.76	6.46	15.4	5.04	3.6	13.3	3.95	2.67		6.67	7.52	9.03	11.5	5.83	7.13	9.97	14.1	3.57	7.11
FA 198	6.76	4.89	3.1	9.34	3.72	-187.743	-130.227	18.1	2.72	5.66	5.33	6.34	12.3	4.63	18.5	9.51	3.79		31.8	10.1	9.03	2.64	6.02	8.87	7.05	3.67	7.01	4.39
FA 199	6.85	6.87	6.52	9.63	4.72	-188.728	-130.942	31.6	4.64	6.31	7.96	4.87	9.51	4.4	2.91	5.59	11.2		2.39	4.47	4.15	14.1	14	4.8	2.7	4.89	4.12	34.5
FA 200	5.08	7.28	7.6	3.64	6.94	-189.713	-131.657	4.66	12.3	20.4	2.86	3.73	5.06	13.1	4.59	3.26	11		10.6	5.51	30.9	31.6	5.3	47	16.4	4.91	4.09	18.9
FA 201	11.5	6.55	13.3	3.01	4.97	-190.698	-132.372	24.3	14.8	3.69	4.44	14.1	3.84	40.1	10	7.13	5.94		11.4	52.6	3.84	5.94	18.5	4.5	41.6	5.78	2.46	11
FA 202	9.54	7.62	15.1	3.54	17		18.1	14.4	3.21	6.68	6.3	9.67	3.73	5.37	5.97	7.17	5.01		29.7	5.55	2.46	10	14	10.9	6.75	7.92	7.32	11.3
FA 203	15.9	3.03	2.37	19	15.8		8.91	6.26	5.08	2.1	3.31	45	6.15	2.7	10.1	3.62	3.91		21.2	3.89	2.67	19	11.2	8.4	14.1	6.81	7.35	5.22
FA 204	17.1	2.87	4.9	2.65	2.61		32	19.6	31.4	12.1	3.4	15.2	5.13	3.43	3.91	8.38	10.7		2.95	7.4	6.43	26.9	5.01	2.59	19.2	23.8	6.7	4.33
FA 205	9.74	3.59	3.51	21	4.35		6.71	5.11	19.3	4.37	23.5	5.95	6.65	5.12	10.9	2.98	3.89		32	3.1	5.18	17.7	6.5	12.8	5.06	3.37	2.37	3.79
FA 206	26.7	10.5	60.9	9.74	4.92		54.8	14.4	10.2	6.42	3.61	3.93	6.68	6.03	9.49	2.69	5.22		20.6	6.13	9.27	6.98	46.9	6.52	6.17	7.34	3.55	8.42
FA 207	3.91	4.8	7.49	7.72	4.39		2.7	3.87	7.02	7.24	5.29	38.4	2.5	14.7	5.31	2.57	23.9		16.4	4.03	46.9	10.1	2.61	18.7	4.22	8.01	7.99	3.86
FA 208	3.49	66.8	7.37	6.59	4.71		22.8	3.85	2.57	3.25	7.01	6.34	3.8	9.24	3.29	189	13.9		5.76	32.9	8.18	22.6	15.9	4.51	30.5	6.08	3.24	4.22
FA 209	2.84	16.8	15.2	15.8	4.96		4.35	5.93	11.3	11.5	2.87	5.54	4.73	17.8	11.2	6.34	7.97		6.52	17.3	15.3	8.83	12.7	12.8	11.8	4.02	10.5	5.68
FA 210	2.22	5.4	3.91	4.43	3.93		4.04	8.18	4.92	19.7	7.98	3.53	9.16	5.85	39.8	26.2	2.33		6.75	8.62	15.7	6.76	29.5	31.1	15.2	75.6	12.3	4.6
FA 211	29.4	5.16	12.3	16.8	2.42		2.82	3.46	52	5.57	6.7	9.13	8.4	5.92	38.2	4.8	9.6		19.7	7.67	2.41	7.37	9.9	6.68	7.41	25.9	4.52	5.18
FA 212	8.09	5.06	3.15	4.29	6.05		14.2	9.11	8.43	10.4	6.21	3.35	2.42	6.02	55.5	7.57	3.67		22.5	4.19	2.73	5.43	3.71	5.63	3.49	6.57	3.99	4.68
FA 213	5.08	13	19.1	15.1	4.94		6.6	14	5.08	14.4	4.08	40.5	2.87	6.25	7.78	48.5	5.55		4.14	44.8	13.4	3.54	7.05	11.5	21.9	30.9	7.23	4.53
FA 214	3.74	4.69	5.28	9.24	5.46		2.71	4.93	30.7	4.93	5.57	11.7	12.3	15.6	3.33	12.8	5.52		3.88	5.45	9.08	25	11.7	4.44	7.52	3.36	15.8	3.1
FA 215	4.49	7.3	10.4	2.54	4.61		28.5	3.12	7.31	6.81	9.5	3.09	6.91	51.8	6.04	131	8.92		3.1	10.7	4.85	4.8	3.17	2.36	79.1	7.26	4.39	7.14
FA 216	6.02	23.3	6.75	3.65	4		15.3	22	12.2	7.16	3.63	15.7	9.23	2.84	12.8	5.72	6.9		6.63	2.92	32.7	33.4	12.5	53.3	4.97	6.48	10.9	5.82
FA 217	4.23	2.95	5.27	8.03	6.68		5.91	10.5	4.09	3.88	3.31	11.2	4.9	2.29	6.32	52.8	15.2		13.6	3.43	4.95	10.9	16.4	5.38	18.4	4.83	9.6	7.34
FA 218	5.7	6.46	42.7	5.61	7.32		15.2	4.93	15.5	2.79	2.72	15.7	3.94	4.24	4.98	7.98	8.66		10.7	27.5	14.2	14.1	6.76	6.48	8.19	30.5	2.75	12.6
FA 219	16.1	7.19	9.09	4.76	4.56		6.83	16.2	9.61	12.5	3.58	4.04	3.45	6.43	40.4	30.2	7.68		21.1	8.69	2.59	2.51	19.4	4.15	10.6	34.6	7.18	9.44
FA 220	11.7	5.14	11.7	6.49	5.9		8.03	5.29	13.7	8.89	6.23	7.94	4.18	4.33	51.2	2.48	2.27		10.1	9.87	7.11	33.7	14.3	14.9	11.6	3.79	4.37	3.86
FA 221	19.8	20.2	6.71	5.01	5.36		6	5.64	11.3	4.15	23.9	11.6	9	8.51	17.2	3.06	7.28		4.12	8.44	3.75	5.85	2.33	27.7	3.84	8.34	2.5	3.69
FA 222	17.4	3.93	41	7.9	5.26		6.21	4.04	4.34	5.54	4.49	3.2	2.23	9.84	4.42	7.32	7.01		21.9	7.09	6.74	15.7	10.5	2.58	7.69	4.21	4.07	7.3
FA 223	40.7	2.4	13.6	4.97	27.3		4.75	4.57	6.91	5.51	7.92	6.33	7.2	23.1	14.6	8.47	8.99		2.53	4.64	21.5	2.26	4.1	6.89	3.25	15.8	6.25	8.31
FA 224	2.87	2.98	5.67	11.8	9.58		4.35	7.48	4.37	4.95	3.7	4.79	2.6	5.51	8.23	19.9	13.6		31	43.1	3.97	9.5	49.5	4.18	36.2	6.03	9.47	12.9
FA 225	3.76	10.9	17.6	11.5	6.57		4.43	5.31	16.8	8.54	6.63	10.7	4.83	5.51	8.12	6.31	21.2		19.8	2.47	4.37	58.2	4.27	31.8	11.6	18.2	5.97	8.47
FA 226	33.2	9.01	11.5	2.9	3.1		25.5	3.86	5.58	3.71	3.53	18.6	9.3	7.45	11.2	6.58	10.1		5.17	3.22	46.2	14.4	3.62	5.48	12.4	20	2.34	7.63
FA 227	8.24	5.2	7.11	3.38	4.92		3.66	34.7	4.67	4.51	5.16	5.07	7.68	10.3	10.2	17.1	9.27		17.7	5.53	6.71	15	2.85	8.53	8.33	6.95	8.59	12.9
FA 228	3.76	7.61	18.6	6.73	12.4		6.92	7.83	6.11	2.62	2.22	3.67	8.22	47.1	8.63	5.25	16.1		5.42	3.28	13.8	7.25	15.3	8.19	8.17	2.7	2.48	7.52
FA 229	5.16	6.73	4.43	21	11.2		9.14	3.64	8.02	2.82	4.13	8.56	2.63	2.15	15.3	5.75	6.91		10.6	25.1	14.4	5.14	28.3	4.63	19.2	23.7	10.5	2.95
FA 230	9.62	2.45	8.22	19.7	29		8.67	3.43	17.7	6.56	2.61	7.5	12.1	2.34	9.13	4.16	5.91		7	7.8	14.2	5.39	15.4	49.5	13	6.28	11.7	13
FA 231	5	5.28	8.01	2.44	16.1		8.07	8.24	12.9	2.5	7.18	44.6	4.69	8.16	9.1	8.58	5.53		13.3	8.23	5.8	15	8.49	7.08	47.8	4.33	4.73	8.49
FA 232	14.3	5.35	5.84	7.37	10.5		31.9	5.82	16.6	5.66	2.47	24	15.9	2.77	10.6	4.81	8.75		7.53	8.78	4.09	11.9	5.15	16	10.8	5.58	3.71	5.6
FA 233	12.3	3.85	8.86	18.1	6.05		6.95	28.6	9.85	11.5	4.11	7.69	5	8.89	9.31	7.17	10.1		4.9	7.77	8.09	3.05	13.2	4.65	5.19	12.9	7.91	7.41
FA 234	11.5	5.35	16	5.85	3.42		20.8	8.25	10.6	8.04	23.4	5.24	4.57	5.02	19.6	14.5	21.7		5.6	2.92	6.61	30.7	5.43	21.5	5.15	4.28	17.4	4.77
FA 235	18.9	21.2	4.3	12.5	13.1		49.1	3.19	79.9	3.48	7.44	18.1	3.23	24.1	2.3	4.71	12.7		7.06	43.4	4.25	34.2	8.58	7.8	16.1	7.97	11.4	3.3
FA 236	11.1	4.2	9.54	12.2	5.73		23.2	11.2	5.63	7.19	10.3	17.5	7.26	2.81	2.57	11.8	9.2		4.21	5.32	10.7	10.1	16.5	5.15	8.74	4.87	9.06	4.17
FA 237	6.29	6.09	14.6	2.38	6.75		22.1	43.2	9.23	3.38	3.97	5.43	9.72	4.68	6.72	12.3	9.12		2.79	5.58	6.45	12.4	2.21	31	23.7	6.98	7.39	8.8
FA 238	4.36	2.23	17.7	7.01	31.9		11.2	3.63	4.61	4.86	5.85	2.95	7.42	3.19	5.59	5.92	5.33		11.5	3.61	3.32	26.3	4.42	6.03	20.9	7.67	3.38	45
FA 239	29.1	8.02	3.43	3.78	9.07		7.48	8.32	14.4	5.15	14.9	5.38	2.3	7.95	6.37	41.4	4.72		40.5	3.51	5.24	23.5	20.2	8.31	3.49	9.32	2.48	29.7
FA 240	6.62	2.76	58.3	4.14	2.91		2.61	16.9	9.41	6.92	2.74	28.3	5.04	11.8	11.2	19.3	6.85		74.5	2.23	9.01	3.89	12.7	8.04	3.14	22.6	3.74	15.9
FA 241	3.39	114	19	5.9	4.36		8.52	8.47	2.9	3.49	3.24	9.41	2.76	43.2	3.25	4.16	8.87		10.6	5.42	15.4	4.36	10.5	2.33	4.49	6.46	5.37	2.95
FA 242	7.59	3.77	9.75	4.71	2.96		5.83	31.7	7.92	4.41	13.1	7.33	5.8	3.52	10.3	4.81	8.63		9.91	2.81	7.13	6.86	64.2	7.38	16.1	6.74	7.35	13.4
FA 243	4.01	20.4	2.96	29.9	3.72		6.4	4.51	4.32	6.85	5.7	8.7	8.65	6.14	33	7.64	15.9		14.4	5.24	11.5	5.84	4.93	20	16.5	10.4	3.75	9.62
FA 244	6.76	8.75	8.36	5.8	3.04		11.2	19.9	3.96	8.79	22.3	10.3	8.18	8.19	24.4	5.1	22.4		8.13	26.3	45.7	11.3	7.76	3.24	8.32	2.74	7.78	3.14
FA 245	4.26	7.54	4.27	11.7	5.59		5.62	11.5	6.31	28.6	4.72	11.1	2.29	5.81	11.3	3.71	9.12		6.41	10.7	4.77	7.75	31.4	19	25.2	5.35	3.19	4.2
FA 246	13.3	32.8	4.19	4.8	3.23		15.7	12	5.99	6.87	14.5	16.2	14	21.7	11.5	22.4	9.84		16.8	10.3	16	10.6	7.95	11.2	17.1	3.19	10.4	16.6
FA 247	7.82	5.45	5.97	8.23	6.84		18.5	11.9	4.81	4.54	4.96	5.71	4.84	17.4	11.5	8	17.5		7.09	8.61	10	13.4	7.9	31.8	22	66.1	10.8	6.05
FA 248	19	3.13	17.1	5.98	29		47.2	9.26	9.66	16.5	9.17	11.9	18.3	6.14	13.6	6.54	6.51		7.85	7.07	5.82	4.48	14.6	6.55	10.8	8.21	3.92	4.95
FA 249	15.9	4.53	9.37	5.92	4.69		8.09	20.4	13.1	3.46	5.19	30.7	6.05	43	2.81	14.9	14		13	43.4	7.16	6.82	22.3	9.24	12.6	21.3	4.9	3.37
FA 250	3.01	3.18	3.87	3.11	8.66		18.9	3.08	15.9	13.4	3.68	22.4	4.83	2.54	5.19	4.37	7.73		5.31	4.01	3.19	9.11	3.24	5	9.9	5.02	7.36	3.23
FA 251	28.4	4.03	5.55	4.59	5.55		4.75	15.6	14.6	4.6	2.49	4.97	5.12	6.34	4.39	10.3	10.6		2.28	4.02	2.45	29	20	24.6	9.78	42.2	7.41	10.8
FA 252	2.84	5.14	2.81	6.95	22		4.34	10.9	14.2	2.45	11	3.51	7.48	5.3	4.69	10.5	14.3		12.7	7.97	32.6	25	6.33	9.8	4.29	3.11	8.95	5.05
FA 253	8.07	3.69	8.22	8.96	2.55		2.56	3.03	13	34.5	3.04	16	9.08	18.4	5.61	4.15	8.25		10.1	6.17	2.44	7.02	9.13	3.54	14.3	6.96	4.38	4.93
FA 254	5.64	7.12	8.79	4.79	13.9		18.5	10.8	5.76	4.55	24.9	19.3	3.76	5.48	10	20.2	10.5		12.1	5.34	10.7	6.47	22.6	19.3	5.6	30.6	10.9	5.46
FA 255	9.87	3.38	2.94	14.2	5.61		12.2	5.88	7.98	4.16	8.59	3.04	2.83	45.4	2.96	2.36	8.39		24.2	5.34	5.17	54.8	7.09	4.06	17.6	13	9.36	3.66
FA 256	8.18	8.28	7.98	5.37	3.92		7.35	12.2	8.01	3.85	3.5	25.1	3.69	41.3	6.63	3.69	8.97		31.4	24.2	2.39	9.19	17.8	18.2	5.99	8.86	2.81	4.39
FA 257	6.11	13.5	15.1	12.5	7.89		8.32	11.5	24.2	6.65	8.53	31.8	9.87	4.08	46.3	17	13		8.09	10.3	6.65	6.62	11	11.4	4.03	14.8	6.69	6.5
FA 258	16.7	9.61	4.35	2.8	2.77		7.52	6.73	12.4	4.04	12.6	2.2	9.02	7.95	11.4	5.08	7.35		8.43	7.22	8.02	18.1	10.9	32.3	31.5	42	4.69	7.07
FA 259	11.2	21.5	6.37	37.3	15.3		19.3	16.5	8.17	18.4	4.5	4.2	10.4	19	29.5	33.6	8.01		10.9	8.68	3.7	12.3	26.8	5.58	4.18	9.59	2.83	3.14
FA 260	20.5	11.2	4.32	31.5	7.43		7.3	9.91	8.98	2.29	2.34	6.55	3.14	36.6	7.17	5.22	14		8.28	7.46	2.79	9.23	27.2	7.5	2.4	5.29	4.6	12.3
FA 261	14.7	6.73	5.52	8.5	6.65		2.62	14.8	9.74	8.17	5.74	36.8	18	51.8	21.9	4.8	7.2		8.27	43.4	8.47	18.4	8.5	3.96	12.1	18.7	5.13	8.05
FA 262	4.03	3.53	19.1	7.98	6.24		5.33	8.54	13.5	7.57	8.66	3.28	5.97	6.72	46.6	15.4	8.98		6.31	2.77	6.4	4	10.1	41	6.19	18	6.99	5.02
FA 263	13	5.33	4.83	9.01	7.44		57.3	3.82	7.89	4.6	3.35	3	4.44	6.19	46.3	6.29	7.55		7.29	5.77	12.7	4.15	11.3	10.8	11.8	21.4	3.14	15.1
FA 264	11.9	15.5	12.7	3.94	5.94		6.64	10.4	4.99	5.73	7.68	10.8	3.83	2.51	45.3	4.36	6.73		13	5.26	42.1	5.61	4.37	4.58	2.83	7.18	10.5	4.69
FA 265	3.75	12.9	6.29	3.19	27.9		19.6	3.47	13.8	2.57	3.43	7.24	6.24	13.2	7.84	4.93	3.63		5.44	24.7	3.77	9.37	7.39	2.1	21.7	4.28	3.68	9.82
FA 266	5.35	12.9	4.67	7.49	7.79		16.4	13.3	5.35	2.33	4.07	20.5	8.54	2.59	47.1	14.5	10.5		19.1	9.12	8.46	8.06	34.5	23.1	2.62	2.59	11.2	11.6
FA 267	8.5	8.38	26.9	5.18	7		3.66	2.82	13.8	4.39	5.75	14	7.42	43.3	17	10.3	11.6		13.3	8.32	7.76	11.3	14.2	5.57	59.7	4.87	10.8	9.51
FA 268	7.63	8.83	3.97	6.42	2.58		7.95	4.63	13	9.62	2.5	12.9	3.17	40.2	31.5	3.39	6.61		14.5	9.13	17.6	7.16	4.07	18.3	10.7	48.3	4.58	2.87
FA 269	8.09	5.44	7.97	3.2	4.83		6.46	4.24	9.52	5.26	4.12	3.15	4.05	2.77	6.2	6	6.39		25.6	50.1	8.61	7.39	7.82	3.69	6.99	10.4	5.35	10.4
FA 270	12.9	4.46	2.7	5.35	6.15		9.3	12.1	15.3	8.02	3.48	17.7	2.82	3.16	131	17	4.42			4.87	6.87	45.1	20.9	4.75	7.9	12.1	7.89	6.11
FA 271	3.3	32.5	9.9	3.61	3.43		2.78	5.45	13.7	4.25	4.9	3.98	4.46	7.55	3.58	6.19	8.57			3.76	6.61	3.53	12.7	5.62	14.8	7.41	16	16.1
FA 272	5.78	5.91	4.76	4.86	4.59		6.52	6.65	15.7	4.65	6.38	40.3	3.41	6	3.93	27.7	12.7			8.44	2.58	7.29	7.82	33.8	17.4	6.97	4.46	6.67
FA 273	6.01	8.01	4.87	3.18	7.07		12	4.85	2.73	7.34	6.46	23.8	10.5	11.9	17	16.7	2.15			6.68	10.4	4.38	6.6	5.04	6.02	4.85	11.5	5.7
FA 274	16.9	4.66	10.5	3.36	7.6		14.8	24.7	19.6	4.27	4.81	4.87	26.5	38.4	17.3	9.51	4.32			22.5	6.32	8.24	14.9	10.2	3.4	11.4	9.9	6.95
FA 275	11.3	5.77	33.8	6.74	2.42		27.9	5.83	27	9.16	10.9	3.52	12	38.8	10	4.79	9.45			9.97	12.1	6.69	6.02	9.17	30.9	16.6	2.89	3.64
FA 276	8.23	4.14	15.1	3.26	3.57		23.5	5.32	11.2	2.96		4.27	18.2	4.75	9.82	9.31	13.7			7.47	3.82	50.7	3.22	41.8	2.29	22.3	6.99	9.26
FA 277	6.27	5.12	3.47	22.2	3.17		45.9	17.3	2.8	5.32		2.35	5.09	2.57	3.8	2.19	4.97			8.75	6.95	9.86	26.5	3.29	5.58	6.64	3.46	8.83
FA 278	4.58	5.6	3.77	8.35	4.78		5.83	4.33	13.8	2.79		18.1	4.8	8.52	13.5	10.5	4.72				9.65	11.2	10.9	20.1	19	19.7	2.86	9.06
FA 279	4.12	5.26	9.84	6.72	9.96		7.55	12.7	24.2	3.47		8.85	6.45	2.39	7.71	9.28	9.17				3.21	16.9	44	2.83	21.8	5.93	4.31	28.5
FA 280	6	4.37	13.3	3.1	7.16		3.45	5.8	53.2	8.31		5.54	18.5	12.9	6.36	39.7					8.64	40.6	4.87	18.5	23.8	5.56	6.2	35.6
FA 281	5.98	3.29	6.14	12.8	5.48		14.1	5.55	10.4	5.07		30.2	6.79	43.5	2.45	13.5					14.3	2.65	20.8	5.92	8.33	7.33	6.98	9.62
FA 282	5.85	3.09	6.9	35.9	6.11		5.45	23.8	28.4	3.1		25.1	4.44	39.1	12.5	192					7.13	2.91	15.4	4.91	19.6	19.5	2.49	13.7
FA 283		21.1	12	27.1	12.5		2.47	21.3	6.23	4.9		5.91	2.8	4.54	9.37	5.7					11.9	11.3	7.89	33.7	15.9	7.04	10.7	21.5
FA 284		8.65	5.22	24.1	4.94		16.9	2.78	5.23	6.49		20.5	3.67	8.68	9.48	60.3					6.01	9.87	23.8	4.15	9.39	73.4	9.44	3.14
FA 285		9.45	9.53	5.72	7.04		8.78	6.22	4.67	6.33		12.4	4.42	14.3	8.3	2.74					39.7	17.1	13.9	5.95	3.28	10.4	4.73	6.22
FA 286		16.8	5.48	6.15	8.06		28.3	11.4	3.45	4.52		5.22	5.12	41.4	18.3	46.9					2.32	13.7	5.42	8.32	25.5	7.28	6.91	2.45
FA 287		10.1	6.39	3.04	11		8.51	3.09	5.42	5.12		2.36	10.2	43.6	2.36	44					15.1	12.5	6.58	40.6	9.7	16.1	6.34	3.38
FA 288		4.3	4.88	6.64	5.71		20.5	32	7.31	4.41		4.78	21.8	6.2	2.7	6.11					3.79	6.83	19.3	10.3	26	37	7.2	3.3
FA 289		6.33	3.38	6.44	18.6		3.09	6.86	5.57	8.19		5.1	17.1	3.87	9.66	3.66					8.49	4.15	8.28	12.2	17.9	13.5	3.38	3.38
FA 290		11.6	9.64	3.5	9.49		45.6	16	9.21	24.6		3.44	6.12	8.56	7.63	8.37					6.03	10.3	9.82	7.79	3.05	7.94	6.95	5.85
FA 291		8.44	10.5	5.1	5.43		4.43	6.7	14.1	8.28		7.96	19.5	6.64	11.2	50.6					3.1	9.4	2.41	18	7.68	23.2	9.38	13.2
FA 292		15.2	6.17	4.46	19.2		3.53	16.9	8.1	2.61		25.1	5.13	12.7	13.2	9.72					3.4	95.7	6.52	6.45	12.1	27.5	6.45	4.21
FA 293		34.8	18.4	4.43	7.25		3.63	3.22	15.2	3.82		11.6	4.79	5.48	6.39	4.36					24.6	9.26	24.4	4.12	7.06	4.11	2.7	3.23
FA 294		4.09	63.6	2.48	6.35		5.6	4.43	10.6	8.31		10.8	2.8	2.64	35.9	12.1					5.37	13.2	4.26	4.12	16.7	20.9	2.48	6
FA 295		57.9	9.2	6.72	2.44		2.49	12.3	4.2	5.71		11.2	3.95	44.2	8.36	2.11					9.91	20.5	6.61	31.6	5.25	7.37	2.4	6.72
FA 296		10.5	25.5	10.4	2.72		8.55	18.4	18.5	5.59		11.7	17.7	5.63	57.3	10.9					6.73	14.4	5.84	4.3	24.7	4.73	4.37	3.13
FA 297		47.2	5.02	3.05	6.09		29	3.28	9.87	3.37		26.1	5.01	3.32	4.49	16.7					2.76	12.3	9.98	37.7	16.8	4.11	5.73	12.3
FA 298		15.6	8.86	11.7	3.14		6.89	21.2	11.8	3.78		7.08	3.69	8.58	10.1	8.58					6.67	9.67	7.19	12.3	3.02	48.5	7	10.4
FA 299		3.31	4.16	3.24	3.94		4.19	7.33	17.9	6.26		8.71	4.44	4.73	12.7	6.41					7.33	10.4	7.86	21.1	11.6	14.2	10.3	4.95
FA 300		2.17	3.59	2.95	9.28		9.8	18	35.6	20.3		5.11	3.51	12.2	5.06	11.3					4.86	8.94	10.7	5.24	4.32	10.2	9.74	2.54
FA 301		7.23	13.3	11.7	3.48		24	5.74	26.2	5.55		3.73	4.74	7.89	3.82	4.3					2.43	6.13	13.9	20.1	5.99	4.43	2.4	3.5
FA 302		3.79	7.94	8.26	3.54		18.5	2.38	3.97	3.96		12.5	9.71	5.88	5.27	16.5					11.7	3.59	15.8	13	21.6	7.4	5.19	8.85
FA 303		4.35	6.86	3.33	3.93		41	8.47	19.6	12.1		29.5	6.44	49.1	5.92	3.27					4.61	5.27	3.94	4.21	34.1	4.54	6.9	6.78
FA 304		17.3	6.44	14	3.11		17.2	5.11	3.94	4.83		8.86	21.5		6.06	40.4					3.2	26.1	4.12	2.94	17.5	6.64	5.63	3.48
FA 305		6.36	14.7	5.8	4.14		2.87	2.22	5.11	4.35		71.1	14.6		5.54	4.62					10.5	12.8	2.29	32.9	6.77	9.16	5.91	8.32
FA 306		10.7	5.29	6.01	3.63		7.42	3.4	9.66	3.35		10.4	4.61		9.9	9.33					6.28	4.43	18.6		29.9	7.24	5.79	12.5
FA 307		2.89	4.11	4.44	3.85		13.8	7.57	5.71	14.8		3.39	4.02		51.2	6.68					7.6	12.8	21.7		16.1	20.7	9.38	18.8
FA 308		30.9	3.14	2.34	6.72		6.49	3.08	2.53	6.09		17.8	20.6		7.95	14.3					14.3	4.94	12.9		2.43	16.7	5.29	3.41
FA 309		3.25	11.5	9.34	5.16		16.5	7.06	6.8	11.2		4.37	4.47		5.85	3.53					25.3	69.4	7.52		3.07	10	4.45	3.88
FA 310		15.9	4.01	15.7	3.65		5.13	4.04	5.98	3.95		17.9	6.1		10.7	3.48					7.48	9.47	34.1		2.78	5.44	6.17	4.53
FA 311		5.07	15.8	2.93	6.06		4.61	2.87	5.39	4.81		3	9.39		42.3	3.15					7.18	2.88	7.35		4.55	7.18	3.8	19.3
FA 312		11.6	13.3	6.08	4.99		7.29	16.2	5.83	3.18		6.52	4.27		17.5	20.3					4.87	13.8	4.86		6.6	17.4	7.07	6.02
FA 313		9.56	17.6	2.51	7.25		21.9	9.34	4.95	4.23		8.43	4.29		109	12.6					37.1	11.4	4.9		24.1	5.89	3.22	6.31
FA 314		7.51	10	12.3	26.3		11.3	7.21	11.3	3.41		11.5	3.44		3.6	4.03					4.69	4.82	2.54		18.9	57.2	11.7	5.83
FA 315		11.3	10.9	4.93	19.3		6.18	4.29	2.82	3.37		27.1	4.74		12	12.9					4.09	4.24	16		16.8	3.87	9.77	4.53
FA 316		13.9	10.3	4.71	2.78		5.78	6.04	3.76	5.43		3.4	9.25		35.9	9.14					15.5	2.57	4.29		23.8	11.8	3.19	5.89
FA 317		9.48	2.78	2.89	9.02		4.18	9.35	19	7.97		7.3	4.76		7.76	35.1					7.54	9.23	15.5		13.3	6.35	6.28	8.54
FA 318		22.7	20.3	7.93	10.2		50.5	15.5	2.71	4.61		31.4	10		17.7	3.7					13.6	9.99	3.21		15.4	37.8	7.11	11.2
FA 319		16	12.9	7.92	19.8		2.63	3.55	6.94	5.16		12.1	9.55		6.5	5.91					7.14	3.59	16		7.81	4.43	5.66	31.8
FA 320		6.11	7.34	6.57	6.3		2.71	2.97	14.6	3.65		3.6	11.5		44.7	38.8					3.39	8.68	22.2		4.04	9.09	6.23	12.8
FA 321		15.8	22.2	8.56	3.95		2.55	2.89	6.38	4.66		5.25	2.34		8.06	10.8					4.47	11.2	9.34		24.2	8.08	11.3	12.3
FA 322		9.13	10.4	2.5	5.42		3.69	5.6	30.6	5.03		4.04	5.69		4.75	3.8					10	10.8	3.87		5.55	17.3	9.46	9.5
FA 323		3.23	4.35	11.9	15.1		7.09	3.58	9.38	8.7		4.99	5.23		6.23	23.8					6.01	4.57	11.2		22.6	22	2.7	5.4
FA 324		3.67	2.93	6.56	5.43		7.5	3.09	12.4	3.85		5.52	5.27		12.5	32.7					4.35	23.1	5.61		3.2	10.4	6.2	7.39
FA 325		6	10.5	16.9	5.55		4.47	2.62	13.7	6.1		17.6	4.91		106	7.02					14.7	6.04	10.3		4.1	2.73	2.62	2.79
FA 326		10.8	15.2	4.69	6.47		4.82	4	3.02	7.04		7.51	4.51		11	11.3					7.26	90	7.83		33.4	35	2.48	7.04
FA 327		3.98	9.99	12.9	3.25		2.69	5.68	5	3.22		22.7	3.91		3.67	4.47					6.26	9.39	12.7		12.5	10.2	4.12	2.66
FA 328		24.1	12.3	12.9	12		6.69	12.9	6.03	8.18		2.86	8.44		8.45	4.04					12.9	14.4	9.56		6.86	16.7	6.19	13.9
FA 329		2.58	7.33	13	15.9		4.9	5.79	8.33	6.33		9.1	5.1		6.85	5.69					11.9	13.3	8.48		2.21	20.2	6.68	7.97
FA 330		3.09	6.03	10.6	3.54		5.94	7.12	7.41	11.4		3.67	6.45		7.06	13.8					12.9	3.76	14.5		21.1	21.2	3.37	4.58
FA 331		27.8	3.55	11.8	6.41		41.4	31.4	8.17	3.71		58.1	18.5		7.14	14.2					3.9	3.53	23		6.25	6.53	10.5	6.34
FA 332		4.33	8.03	4.99	4.57		6.96	7.02	24.9	6.35		5	22.5		5.97	8.12					13.1	4.43	4.35		6.42	21.3	8.58	13
FA 333		4.75	7.52	3.36	4.41		20.4	7.74	10.3	8.77		37.7	10.6		10.7	4.17					41.4	9.39	12.7		31.2	5.88	2.64	9.04
FA 334		2.5	3.38	22	5.64		8.39	6.1	8.36	22.8		4.55	3.61		10.7	6.44					3.56	8.94	3.81		4.91	2.53	4.36	4.62
FA 335		6.74	9.47	32.3	6.45		5.76	2.98	6.22	9.16		8.14	7.35		22.5	9.26					12.8	5.37	7.7		8.15	33.5	6.23	4.51
FA 336		8.9	5.91	3.88	5.92		3.92	9.7	11.4	2.78		15.4	26.1		3.1	22.7					5.88	4.07	25.9		3.85	3.41	6.7	9.82
FA 337		8.88	4.32	3.94	6.72		77.8	5.5	15.4	6.49		26	4.88		4.45	4.46					21.9	4.72	4.11		15.2	13.8	4.41	4.12
FA 338		14	11.4	18.3	6.97		15.9	12.2	8.52	5.92		6.92	4.53		9.19	4.08					3.05	8.8	5.17		2.93	9.94	7.16	6.63
FA 339		20.8	27.1	2.9	18.2		16.4	8.73	5.47	3.13		4.1	3.82		5.64	6.16					12.2	11	2.55		4.26	6.88	6.43	4.96
FA 340		4.85	51.9	12.6	10		5.47	17	19.7	4.19		7.32	4.04		5.25	5.4					8.23	4.41	8.79		9.13	5.35	9.48	11.9
FA 341		33.2	4.87	3.9	12.1		8.28	6.82	5.27	9.78		14.8	8.59		3.51	13.8					2.38	19.9	7.1		8.03	5.88	6.25	8.45
FA 342		4.85	15.3	6.97	7.1		4.2	5.01	17.3	17		4.41	4.95		3.44	2.41					6.27	2.43	9.71		22.2	2.66	3.63	9.38
FA 343		11.1	19.9	4.71	18.5		2.6	4.62	10.7	5.94		4.5	6.93		6.73	9.89					13.6	92.7	3.23		5.98	5.33	5	11.2
FA 344		3.64	3.3	2.86	4.1		3.99	14.1	10.9	5.71		3.51	11		5.45	128					4.25	10.7	11.7		29.9	16.8	5.95	24.2
FA 345		4.76	3.98	4.82	2.77		3.54	6.64	21.2	10.6		5.8	6.72		29.7	17.3					6.35	16	15.7		3.95	2.07	2.36	7.45
FA 346		6.25	13.6	7.19	2.43		24.4	9.52	16.4	5.84		15.2	7.78		12.1	11.6					10.8	13.4	10.8		7.29	7	10.2	4.57
FA 347		11.7	7.02	3.9	6.77		11.9	13.9	14.5	14.1		5.31	5.39		8.56	3.03					10	5.67	5.21		4.03	16	9.08	4.4
FA 348		14	10.7	2.35	3.15		32.1	5.98	5.56	4.12		19.8	19.5		43	4.29					6.36	8	3.48		42.2	7.44	3.69	7.42
FA 349		7.66	6.16	3.8	3.18		25.5	27.4	2.96	14.2		22.9	9.57		7.41	5.33					11.4	7.53	9.64		6.88	3.32	6.32	4.4
FA 350		6.44	9.91	6.5	4.1		13.6	40.8	21.3	5.13		3.59	7.84		14.8	17.5					2.22	3.34	7.58		4.17	6.74	6.14	7.77
FA 351		6.37	22.7	7.56	20.4		7.64	9.74	25.8	17.6		2.22	4.15		3.41	9.23					4.65	11.1	18.3		6.58	6.33	4.59	8.8
FA 352		18.5	3.32	3.71	12.1		3	26.5	15.7	4.6		7.79	4.78		5.69	5.91					5.2	2.48	3.89		3.47	10.2	7.55	29.5
FA 353		4.69	6.3	4.68	2.83		9.84	32.8	54.1	3.35		4.06	4.36		12.8	9.98					40.6	19.3	8.59		3.02	2.25	5.56	12.9
FA 354		2.4	12.6	4.3	5.25		20.4	6.02	4.32	4.98		28.3	3.49		8.74	13.2					11.6	78	11.7		10.2	59.7	10.2	12.7
FA 355		4.64	4.18	12.2	5.34		8.48	6.16	7.46	7.94		34.5	8.04		37.2	109					2.95	10.6	3.23		4.42	13.2	5.78	10.1
FA 356		8.02	2.9	29.8	8.18		3.2	3.73	8.73	5.18		27.2	12.1		25.3	8.89					7.75	13	38		6.87	41.3	2.83	5.58
FA 357		6.51	8.58	7.22	17.4		19	8.38	18.1	11.4		7.83	10.4		148	32.3					12.5	10.5	5.49		23.2	6.51	5.14	6.76
FA 358		7.39	11.2	12.8	7.04		73.4	8.04	2.79	3.44		13.3	28.5		7.53	7.05					3.16	18.2	8.42		7.53	7.71	5.7	5.46
FA 359		7.5	11.6	8.74	13.9		3.99	3.09	10.6	6.81		13.6	4.24		4.68	32.2					2.47	5.21	6.87		3.26	20.8	3	2.92
FA 360		8.09	8.16	3.48	4.72		2.93	22.5	4.11	5.72		5.01	9.33		24.1	7.28					11.7	6.39	8.24		3.33	8.69	10.6	7.05
FA 361		6.51	20.9	4.67	8.14		3.59	5.42	6.39	3.62		5.46	6.43		19.1	3.08					7.5	9.58	3.03		10.5	10.6	8.93	2.8
FA 362		6.08	4.03	10.2	5.89		30.9	5.86	5.14	2.19		15.7	19.6		5.81	4.15					4.39	2.82	4.91		4.17	21.2	3.37	14.4
FA 363		32.3	6.81	11.6	3.55		8.42	18.7	6.79	2.81		4.48	3.63		57.1	5.96					5.15	16.1	3.62		10.8	16.2	6.34	4.68
FA 364		16.9	4.17	4.95	15		19.2	3.75	13.8	5.39		3.36	4.82		2.31	43.5					5.99	72.4	13.1		3.89	11.7	6.34	3.56
FA 365		7.4	6.47	13.8	5.74		13.4	13	7.54	5.66		4.91	5.4		7.32	5.72					7.31	15.1	5.05		27.6	6.29	6.08	6.92
FA 366		2.42	4.22	4.02	5.42		3.92	6.28	10.7	9.02		3.19	4.85		6.12	8.52					14.9	19.5	4.13		3.61	10.1	7.59	3.35
FA 367		3.41	9.74	2.94	6.58		6.63	3.35	18	7.09		5.19	4.64		7.4	2.75					7.28	9.32	7.44		19.5	4.29	6.32	5.32
FA 368		3.74	7.06	3	15.4		15.1	3.32	21.3	6.82		3.41	4.92		6.9	6.45					8.13	11.2	3.26		32.5	27	9.71	2.81
FA 369		6.18	9.89	3.87	2.91		11.9	6.19	4.94	6.53		32	9.17		6.41	43.9					22.7	9.4	2.43		2.34	20	5.85	13
FA 370		4.65	17.6	7.5	5.3		78.4	20	19.9	6.65		4.72	12		17.4	4.76					11.1	20.2	16.9		6.07	3.67	2.35	5.93
FA 371		96.2	10.1	5.23	5.57		6.07	4.61	15.2	21.5		22	11.1		6.94	10.1					8.39	5.23	10.9		10.2	27.3	2.64	4.84
FA 372		3.32	17.7	6.66	4.18		14.4	6.31	26.4	6.64		4.27	26.2		3.06	25					3.9	4.22	6.53		5.8	5.26	4.29	6.2
FA 373		3.33	3.78	5.22	4.28		19.1	10.2	21.9	6.07		4.24	8.01		4.39	12.2					39.4	5.76	4.55		3.7	27.7	9.82	5.3
FA 374		19.2	14.6	3.77	5.21		8.17	16.3	6.36	3.12		8.72	3.8		11.9	4.02					3.69	7.5	9.2		3.19	9.36	3.3	5.31
FA 375		4.36	6.5	6.18	8.86		6.64	3.1	6.35	4.89		4.11	5.99		13.1	16.5					11.7	4.88	7.71		3.65	9.58	11.6	8.93
FA 376		5.69	9.87	8.68	9.71		5.84	3.86	3.16	9.87		41.9	24.1		7.94	5.55					10.2	8.1	11.1		2.5	2.62	9.11	5.23
FA 377		3.83	3.26	7.34	4.57		8.32	7.54	5.46	20.7		4.58	2.72		2.84	21.7					6.86	17.7	22.4		12.8	4.1	4.09	5.48
FA 378		36.4	3.92	11.7	2.84		28.9	4.29	9.22	6.22		12.8	5.75		9.06	8.58					14.7	6.3	3.39		8.32	6.07	6.75	2.57
FA 379		4.01	11.8	5.76	3.11		17.1	8.15	16	7.31		13.8	5.76		4.85	9.63					4.09	35.8	36.5		5.1	15.6	6.99	11.1
FA 380		4.37	6.23	3.73	3.59		12.5	3.76	6.38	11.5		40	5		8.13	12.3					6.3	32.1	4.58		18.2	10.9	7.38	8.73
FA 381		42.6	46.5	4.38	3.51		15.6	4	3.36	6.84		13.5	4.51		9.82	2.41					7.26	17.7	12.3		10.7	3.42	8.19	19.8
FA 382		7.76	2.4	9.69	2.74		4.11	4.18	7.92	3.27		8.66	8.98		6.29	8.91					4.28	9.49	9.65		7.29	10.1	6.46	3.36
FA 383		10.1	15.6	23.1	5.51		39.5	7.63	10.9	15.7		5.42	5.04		3.6	10.8					11.6	3.97	5.08		6.01	17.2	9.42	16.3
FA 384		4.66	4.95	23.7	2.99		5.87	4.05	5.49	2.7		9.81	18.7		10.8	5.6					4.98	10.6	3.55		3.2	6.34	5.34	7.27
FA 385		4.43	9.4	5.9	6.43		7.49	11.3	21.8	17.3		11.7	16.1		7.74	6.37					11.4	17.2	5.01		10.2	7.51	4.68	3.51
FA 386		4.3	9.13	8.41	2.29		9.24	33.4	9.3	8.68		3.39	2.75		3.15	13.7					11.5	14.1	5.55		12.1	7.04	4.56	5.02
FA 387		5.72	2.53	11.8	6.13		3.13	4.35	3.83	2.98		4.22	3.24		5.94	5.75					5.23	6.33	5.34		6.03	12.7	10.5	6.88
FA 388		3.03	7.41	3.2	3.16		60.7	4.18	10	10.5		2.57	9.22		2.43	2.3					5.35	2.8	7.96		13	63.9	9.03	7.15
FA 389		4.32	9.21	5.52	8.73		13.1	5.35	6.27	7.39		4.83	6.66		9.61	23.6					4.22	7.48	5.11		4.47	6.34	6.87	28.2
FA 390		8.85	3.17	13	3.47		6.87	7.14	17.3	4.48		3.08	9.56		6.8	5.83					21.4	2.73	6.87		5.61	39.1	6.54	36.6
FA 391		3.61	16.7	15.4	3.88		3.5	7.8	6.5	5.32		2.45	4.72		13.1	5					3.94	8.28	4.42		11.3	4.73	7.66	3.55
FA 392		10.8	3.76	3.71	13.9		4.72	8.02	14	4.28		7.82	6.87		31.6	6.54					5.02	21	5.09		20.5	10.7	2.89	13.4
FA 393		7.53	6.53	6.93	3.27		3.36	22.6	14.2	6.66		3.59	5		12.9	5.68					36.9	19.8	10.1		6.56	12.6	5.78	7
FA 394		7.93	13.2	6.06	2.34		2.56	7.37	3.54	4.53		19.6	3.56		12.7	13.7					4.57	7.13	3.59		12.1	11	9.62	5.85
FA 395		21.2	5.85	9.05	2.9		2.88	9.58	18.2	4.33		44.4	4.7		35.4	12.1					11.6	29.7			15.7	14	6	6.6
FA 396		3.27	16.9	5.37	3.88		3.36	11.1	8.55	13.9		3.41	5.47		5.44	7.73					4.72	2.88				18.3	2.48	6.35
FA 397		3.96	8.69	13.7	16.4		25.5	6.97	6.13	4.8		8.79	4.51		2.24	2.64					9.47	8.82				7.1	3.05	2.41
FA 398		4.83	4.41	3.63	9.65		4.92	22.2	6.74	11.1		25.2	4.67		4.05	10.6					6.23	6.7				37.3	3.44	7.34
FA 399		4.32	7.93	3.02	24.5		6.38	3.45	7.44	6.28		3.26	17.9		3.45	10.6					3.15	10.3				3.83	4.07	7.85
FA 400		21.7	10.7	5.57	3		5.26	28.6	26.1	7.21		3.15	15.4		16.8	6.75					7.09	10.2				4.94	2.99	10.3
FA 401		5.13	8.65	12	11		26.4	7.72	2.63	5.4		34.7	3.94		5.7	14.5					8.85	6.79				16.3	2.36	5.53
FA 402		6.32	7.67	13.1	7.18		3	23.9	9.79	8.25		4.21	7.77		12.3	4.57					8.27	15.7				3.12	11.6	6.25
FA 403		5.09	2.51	2.94	6.03		59.9	15.6	6.56	4.3		5.19	4.59		80	7.1					13.5	15.8				17.1	8.29	4.45
FA 404		8.28	3.29	4.65	19.8		4.57	7.95	5.44	3.77		16.3	6.8		5.6	5.28					11.8	3.04				4.83	3.24	2.57
FA 405		2.22	6.33	6.27	16.5		31.2	6.17	10.6	20.7		14.6	9.83		3.56	4.03					11.6	8				5.09	6.27	12.6
FA 406		8.34	14.7	4.62	5.03		12.3	32.2	16.5	8.5		2.9	6.31		24.5	6.16					8.3	7.24				14.5	6.47	5.43
FA 407		3.02	15.1	8.18	4.2		3.3	3.66	8.46	4.01		27.6	3.76		15.6	16.3					6.31	2.31				39.2	3.38	5.73
FA 408		4.57	2.55	8.58	10.9		15.8	7.04	7.59	2.77		4.4	3.89		6.96	2.43					3.05	3.2				7.03	8.18	5.27
FA 409		5.53	7.68	6.49	3.55		2.65	3.1	20	4.2		6.02	5.85		17	29.8					7.48	7.32				12.2	4.21	10.7
FA 410		4.32	4.71	3.67	2.54		9.67	27.4	4.35	9.03		6.1	3.34		14.5	6.54					4.63	8.06				6.59	5.29	3.31
FA 411		8.87	5.84	9.34	5.69		29.9	5.13	3.93	18.3		13.6	5.76		5.13	30.2					11.5	20.4				4.29	9.58	5.37
FA 412		9.15	11.6	7.93	6.5		10.1	4.09	11.3	8.57		5.01	5.32		11.7	11.9					30.5	20.3				5.79	5.14	3.73
FA 413		125	31.1	18.1	12.2		2.58	2.35	11.9	4.67		3.34			17.7	8.06					7.8	27.6				8.31	2.5	3.25
FA 414		5.67	4.35	34.4	11.3		21.6	3.36	24.1	4.17		19.3			21.7	60.7					17.3	6.12				11.8	2.65	8.44
FA 415		8.29	18.5	7.94	4.17		4.24	4.07	17.6	4.65		6.23			44.1	3.9					12.2	6.7				16.7	2.87	11.1
FA 416		4.38	7.97	6.15	5.47			3.59	10.6	6.41		21.2			11.6	7.82					7.22	10				4.65	2.69	7.61
FA 417		6.58	4.47	5.11	7.68			2.66	4.53	6.47		4			8.26	9.95					9.49	2.94				9.8	10.7	11.8
FA 418		4.24	3.57	2.87	3.74			5.97	11.3	13.9		9.36			11.7	9.12					4.5	7.45				4.8	8.65	7.59
FA 419		7.64	39.6	11.2	7.49			16.9	22.9	19.6		3.33			18.4	3.52					7.84	4.16				12.9	5.74	2.52
FA 420		2.27	3.65	4.19	18.4			3.13	2.71	5.48		4.16			6.32	2.7					10	17.2				7.4	6.59	7.39
FA 421		22.2	5.31	4.23	4.01			7.93	7.73	5.47		3.28			12.9	4.34					7.05	16.3				7.04	6.58	23
FA 422		8.74	10	10.5	3.26			8.67	6.99	2.39		26.3			8.9	11.7					13.9	6.44				6.04	6.25	6.2
FA 423		6.77	4.96	5.69	3.03			3.3	42	5		107			6.83	20.9					11	7.24				24.3	4.82	6.58
FA 424		19.1	3.86	6.49	2.8			4.66	7.41	10.4		15.5			9.3	161					4.51	4.77				11.3	5.24	5.07
FA 425		3.81	2.3	6.28	8.22			2.39	11.4	2.61		7.06			10.3	3.09					14	5.85				13.6	9.56	3.27
FA 426		3.49	19.6	4.73	4.32			9.01	4.82	2.87		5.92			4.78	9.49					4.33	3.18				45.5	2.83	7.12
FA 427		11.1	9.94	5.44	13.7			7.42	5.49	3.56		23.1			5.14	26.6					8.23	19.1				8.5	5.05	8.25
FA 428		16.5	2.73	5.02	4.19			7.34	4.52	10.3		2.28			5.93	5.85					4.5	6.93				19.4	9.67	30.3
FA 429		3.36	9.34	18.7	16			2.67	7.12	3.57		5.05			9.67	18.5					4.73	7.68				7.05	7.46	18.5
FA 430		4.96	54.1	14.5	2.61			2.69	4.7	7.59		3.57			22.3	7.25					14.8	10.2				6.3	7.23	3.73
FA 431		9.91	4.17	6.35	3.81			3.6	9.38	7.42		16.5			13.4	90.8					6.72					11.4	5.87	12.5
FA 432		7.94	3.64	21	25.1			8.59	13.9	5.91		16.6			11.4	3.39					13.4					4.3	5.77	8.49
FA 433		8.9	17.2	3.75	22.6			4.5	7.48	7.55		6.41			3.49	4.66					2.95					4.11	4.12	2.94
FA 434		5.21	4.39	5.36	3.39			10.1	8.92	3.23		2.4			18.7	5.14					6.4					5.14	9.24	7.79
FA 435		12.5	5.4	7.78	4.24			6.61	15.9	5.56		18			11	8.04					4.57					6.96	6.39	4.66
FA 436		37.2	2.9	5.98	5.99			7.63	7.34	9.61		3.36			3.98	7.07					5.3					8.47	2.54	2.65
FA 437		4.68	6.26	7.61	7.03			6.76	3.38	2.69		4.82			17.2	4.26					13.5					4.39	5.04	2.94
FA 438		23.6	7.11	10.9	4.68			4.79	13.8	3.03		4.52			48.4	4.51					5.38					30.9	2.5	2.85
FA 439		8.73	11.5	13.2	30.8			32.3	8.12	6.27		19			10.4	10.9					6.78					4.91	2.37	4.71
FA 440		4.87	4.63	8.32	7.42			31.1	4.49	17.3		2.64			11.9	14					4.07					2.56	4.21	5.12
FA 441		11.5	5.72	4.9	8.85			5.13	7.95	6.88		67.1			12.3	14.2					12.3					5.6	2.76	3.5
FA 442		35.8	7.83	7.55	5.97			10	8.51	4.54		9.83			3.87	11.3					10.4					37	3.2	2.95
FA 443		6.98	10.9	7.36	7.01			2.23	6.95	2.58		3.35			3.35	5.73					13.3					6.72	10.5	11.5
FA 444		23.3	5.59	5.16	6.42			2.81	25.5	7.63		24			15	6.66					3.7					8.35	7.72	7.07
FA 445		12.3	5.91	4.45	8.96			5.31	24.9	16.4		6.63			43.8	7.67					17.7					7.01	7.46	5.49
FA 446		7.98	2.63	10.3	8.11			9.65	5.07	8		32.1			23.7	8.84					16.4					5.41	6.9	3.81
FA 447		8.89	7.09	3.49	7.89			8.19	2.5	4.23		3.13			122	12.1					4.9					4.19	2.87	4.85
FA 448		22.4	8.39	7.49	4.65			18.1	4.93	3.63		5.68			13.1	31.8					4.18					5.4	5.19	4.55
FA 449		4.76	11.7	20.2	2.33			14.3	2.83	5.06		5.09			3.67	6.33										4.7	3.02	11.5
FA 450		15.3	32.8	5	3.93			16.3	9.08	12		3.59			11.6	5.23										10.3	5.54	4.62
FA 451		6.55	27.6	9.75	5.25			23.4	3.9	17.2		9.57			18.3	7.76										15.8	9.7	4.74
FA 452		4.03	3.35	34.1	3.69			6.75	25.6	5.71		10.3			15.6	5.66										3.25	3.3	8.6
FA 453		29	14	6.95	3.72			7.28	4.05	4.28		6.5			5.62	49.1										6.21	3.8	13.7
FA 454		4.73	6.3	4.29	5.35			3.52	12.5	11.3		45.2			13.6	5.85										2.98		9.94
FA 455		5.17	4.27	12.3	8.93			8.11	7.45	4.27		2.73			14.1	11.6										9.47		9.73
FA 456		3.65	10.8	5.66	4.14			25.4	10.5	7.6		8.42			3.08	3.6										32.6		5.95
FA 457		2.21	3.34	17.2	7.44			20.1	13.9	4.21		17.1			69.1	7.36										4.93		4.94
FA 458		10.3	5.17	18.2	2.26			9.32	15.3	7.35		3.68			20.4	3.84										18.8		6.07
FA 459		10.2	3.61	18.8	5.1			14.7	11.3	5.99		6.97			28.3	7.76										3.77		17.6
FA 460		32.2	10.9	3.19	4.99			15.1	7.93	16.3		4.27			7.66	4.91										6.75		6.93
FA 461		9.45	15	4.43	5.92			4.19	7.51	3.09		38.8			4.03	75										23.1		7.43
FA 462		10.3	3.25	5.79	5.42			4.11	13.6	5.63		8.17			4.17	30										37.8		2.55
FA 463		5.5	18.2	4.85	5.74			14.3	6.55	3.17		7.05			9.24	8.01										6.15		3.23
FA 464		3.34	5.86	10.5	4.56			7.9	14.8	3.43		9.45			11.4	40										4.4		6.65
FA 465		7.17	31.5	2.44	6.5			13.1	11.1	15.1		5.59			5.57	48.9										22.6		4.99
FA 466		30.3	5.8	9.53	28.3			5.27	3.4	3.76		6.12			11.7	7.64										44.2		29.4
FA 467		15.5	6.01	7.03	8.14			8.87	16.3	5.78		25.2			5.65	6.07										6.41		5.76
FA 468		5.18	10.1	5.31	4.97			4.26	5.19	16.6		5.74			2.34	20.3										8.23		62.5
FA 469		39.5	11.3	6.25	5.5			5.62	13.1	7.26		3.19			4.99	13.4										24.2		16.6
FA 470		4.26	5.46	4.96	10.2			5.21	7.42	4.63		5			15.6	11.8										7.46		7.63
FA 471		9.23	6.19	2.67	8.42			2.5	7.84	6.62		3.4			3.88	10.9										5.68		6.7
FA 472		24.7	7.38	6.68	4.91			3.59	6.05	4.57		8.93			26.3	3.93										5.59		3.62
FA 473		2.88	5.16	6.43	12.1			14.5	13.6	7.32		8.88			11	56.9										14.8		4.25
FA 474		9.98	2.47	7.1	16.3			5.94	4.63	4.77		2.74			12.9	15.1										3.19		3.46
FA 475		5.27	5.6	8.97	7.93			4.43	8.33	5.72		6.49			13.3	2.44										5.42		8.45
FA 476		2.8	50.9	9.55	5.23			3.33	3.93	9.6		45.4			291	7.03										5.33		2.34
FA 477		11.6	8.03	6.92	4.08			17	5.06	4.06		2.54			9.6	8.8										29.3		5.09
FA 478		9.37	3.62	4.98	7.41			5.56	9.2	5.56		27.3			19.2	24.8										4.53		3.41
FA 479		3.27	7.1	15.9	2.16			4.48	14.9	9.33		2.99			2.16	5.14										5.91		4.37
FA 480		5.86	3.27	30.6	5.27			5.97	7.55	2.71		4.8			20.1	16.4										4.53		4.62
FA 481		18	2.48	7.58	3.04			10.1	13.6	2.61		9.2			12.5	15.4										5.84		11.1
FA 482		7.84	6.59	2.91	7.45			2.85	2.84	10.8		4.14			21.6	52.5										6.51		6.61
FA 483		19.7	10.8	9.67	5.77			2.64	5.39	4.86		3.91			2.42	5.52										3.17		3.33
FA 484		34.6	4.94	3.92	13.7			8.73	3.09	4.2		3.43			16.8	2.95										9.53		4.4
FA 485		3.57	5.87	5.08	17.2			6.45	12.8	18.9		8.93			41.5	6.27										5.17		7.88
FA 486		12.2	4.19	5.13	5.89			10.4	12.3	3.14		5.98			13.1	2.94										8.01		3.61
FA 487		3.46	6.27	8.42	4.44			8.58	22.8	4.19		5.79			4.5	3.99										3.89		4.31
FA 488		58.5	3.09	7.5	3.24			2.7	21.6	14.8		15.9			21.4	13.4										12.9		14.2
FA 489		7.55	8.47	16.3	4.14			5.09	3.71	6.52		6.53			32.3	5.52										27.3		17.9
FA 490		8.72	6.3	5.75	3			3.07	8.82	3.2		29.6			13.6	2.37										8.3		12.5
FA 491		9.76	5.86	7.03	3.23			5.59	20.5	3.61		7.47			13.5	26.1										4.35		6.38
FA 492		2.3	6.29	18.9	9.21			8.17	38.2	4.55		5			5.53	8.06										16.5		4.09
FA 493		53.9	4.72	10.1	3.95			8.54	6.99	7.94		3.03			3.36	19.3										62.1		3.72
FA 494		3.93	27.1	3.02	5.72			11.5	7.82	15.3		10.2			5.4	3.4										9.89		8.74
FA 495		2.73	28.1	6.48	12.9			5.15	8.16	7.14		5.82			11.1	14.1										2.43		4.63
FA 496		2.73	11.7	10.1	20.3			8.25	9.26	5.53		3.69			11.4	38.7										27.2		15.2
FA 497		3.52	5.28	3.62	3.63			21.6	3	7.17		17.8			12.7	9.79										3.78		5.39
FA 498		3.52	22.1	3.01	3.12			9.89	19.6	5.55		65.8			8.96	19										3.93		9.6
FA 499		19.1	5.93	29.5	6.91			10	14.8	4.32		3.63			97.2	3.21										7.68		4.23
FA 500		26.1	6.21	3.04	4.96			9.1	4.47	5.06		6.64			3.91	28.1										20		5.64
FA 501		3.54	4.99	3.26	6.32			6.49	12.8	9.31		14.8			25.2	6.68										13.8		5.87
FA 502		44.5	10.6	3.08	14.5			7.51	10.6	3.68		5.27			2.84	4.99										9.98		31.5
FA 503		18	7.91	2.95	4.16			3.15	3.52	3.05		5.98			2.76	2.75										35.6		7.61
FA 504		4.74	17.7	5.88	4.46			6.42	21.7	4.58		9.71			9.55	3.11										2.57		56.3
FA 505		19.3	3.08	3.66	3.59			26	8.43	4.81		7.38			3.51	7.03										8.72		18.4
FA 506		3.63	8.72	4.32	7.27			3.25	27.4	12.1		5.99			137	81.6										29.2		9.03
FA 507		5.69	8.08	8.73	22.1			5.53	3.71	4.43		7.2			13.4	18.3										8.26		2.38
FA 508		15.1	15.5	7.82	11.7			12.9	6.27	5.46		28.6			8.67	6.94										14.8		3.2
FA 509		6.48	7.34	8.72	4.48			5.96	6.33	4.97		6.63			5.53	7.74										19.4		4.75
FA 510		44.3	32.5	3.5	5.38			8.42	8.46	3.21		4.98			25	3.66										4.93		5.91
FA 511		7.64	4.62	5.9	4.17			9.14	5.29	5.23		4.48			23.1	4.79										8.33		5.02
FA 512		3.57	6.74	11.9	5.45			6.26	28	17.8		2.79			11.1	6.49										5.73		4.86
FA 513		8.79	5.32	2.87	6.39			8.42	5.62	13.2		9.38			3.59	6.49										4.44		4.05
FA 514		9.68	4.61	7.61	2.58			2.97	3.74	4.14		6.6			19.2	3.8										4.51		2.35
FA 515		13.9	9.32	4.51	5.39			7.91	2.54	2.68		4.81			2.88	27										14.4		5.08
FA 516		39.7	5.15	11.2	3.27			7.98	6.62	2.58		7.6			10.6	5.89										4.85		10.6
FA 517		5.73	2.37	12.8	5.02			39.1	2.63	12.8		5.82			4.25	9.35										9.84		5.95
FA 518		5.7	3.93	5.92	5.02			8.09	2.96	4.03		2.94			47.3	7.07										26.2		4.68
FA 519		5.98	14	32.6	4.9			6.3	10.4	5.1		5.29			15.9	5.47										4.34		3.43
FA 520		13	14.4	22	2.5			7.47	10.3	6.55		62.7			4.97	3.59										4.99		7.61
FA 521		34.8	5.15	4.19	3.56			4.64	9.04	3.24		7.15			60.9	9.36										3.32		5.8
FA 522		23.6	36.5	6.52	7.24			5.78	6.44	6.96		9.38			7.87	29.2										6.37		4.51
FA 523		2.5	6.56	2.89	4.6			20.4	12.6	13.8		11.7			9.49	7.4										8.28		3.03
FA 524		4.41	4.5	5.78	17.2			3.61	6.25	8.2		4.19			6.13	3.68										3.27		13.8
FA 525		2.75	8.76	4.22	9.73			4.02	6.05	4.13		2.96			37.2	8.1										9.46		19.4
FA 526		5.43	6.82	19.9	5.79			8.03	14.6	3.22		11.8			6.27	3.38										7		7.04
FA 527		3.11	4.84	7.24	12.5			8.55	17.1	3.89		10.1			3.53	4.3										5.97		2.31
FA 528		5.77	6.28	12.1	5.5			9.77	4.73	4.61		7.37			5.85	40.3										5.4		7.51
FA 529		3.37	3.18	14.3	6.25			15.8	7.91	3.73		3.91			23.1	5.49										16.9		6.07
FA 530		6.31	6.07	3.2	5.02			6.08	7.97	3.22		23.2			50.7	4.04										27.8		4.73
FA 531		9.51	10	4.75	6.48			4.93	6.96	4.6		4.14			7.79	48										4.52		3.44
FA 532		7.17	14.5	6.94	3.87			4.76	3.89	9.66		18.3			3.87	10.2										8.52		16.3
FA 533		4.48	4.46	9.68	6.38			27.3	9.62	9.07		4.77			3.25	3.93										9.31		7.59
FA 534		12.8	6.17	2.87	5.63			3.15	3.44	4.03		3.47			6.37	2.62										57.1		5.47
FA 535		8.93	5.15	9.91	28			4.36	8.62	3.94		7.1			4.79	40.5										3.15		5.73
FA 536		15.6	5.24	7.65	6.93			4.34	9.06	12.7		4.77			14.2	4.79										14.1		2.94
FA 537		3.68	6.85	3.33	3.16			2.65	6.48	11.9		7.71			6.94	3.33										12.2		5.62
FA 538		4.5	4.45	6.02	10.3			5.05	6.96	6.47		5.48			92.3	6.94										14		10.9
FA 539		6.78	6.69	6.7	6.66			7.14	16.3	12		4.14				4.18										10.6		3.84
FA 540		10.9	4.37	10	3.18			4.74	6.78	4.33		67.2				27.5										24.3		60.2
FA 541		11.1	5.29	2.75	9.83			5.27	17	9.7		5.56				4.9										58.8		3.22
FA 542		4.21	6.89	9.27	7.11			2.73	6.07	5.05		24.9				11.4										13		10.4
FA 543		10.7	25.1	5.8	6.07			8.82	13.6	4.03		2.9				41.9										16.4		2.37
FA 544		8.03	24.9	6	16.5			3.69	11.3	6.22		2.77				12										17.4		3.52
FA 545		4.49	2.81	27.6	5.23			3.56	22.6	2.24		10.2				8.86										9.51		6.02
FA 546		2.82	9.33	11.5	8.08			10.9	2.96	5.86		12.4				6.54										3.09		3.13
FA 547		13.9	22.9	7.21	13.2			3.7	17.1	17.3		5.84				3.05										5.81		8.05
FA 548		5.85	8.96	14.1	2.39			5.45	4.59	7.03		25.5				6.81										4.28		2.38
FA 549		17.8	7.26	20.5	3.3			5.53	19.3	8.12		3.07				4.36										2.95		2.39
FA 550		5.54	12.3	2.64	25.6			3.11	14.3	4.58		18.9				3.3										2.55		5.98
FA 551		20.6	8.93	9.7	3.5			3.76	8.39	8.32		4.85				11.3										13.7		2.61
FA 552		8.26	10.2	3.18	2.85			4.11	2.56	4.13		3.11				3.79										7.25		4.97
FA 553		4.48	10.6	12.2	2.93			5.35	44.6	7.5		5.88				5.23										3.27		2.24
FA 554		6.25	6.35	2.7	2.51			2.22	4.7	9.04		7.51				3.49										12.7		3.3
FA 555		12.8	8.52	2.67	10.2			2.61	2.85	3.17		6.63				5.01										11.8		12.9
FA 556		14	16	7.78	3.29			7.66	8.1	3.56		5.57				2.43										10.9		9.58
FA 557		2.78	4.11	4.78	21.4			8.47	7.97	5.05		72.2				26.5										3.75		4.55
FA 558		6.65	5.45	8.45	2.9			8	3.44	23.9		6.68				4.76										3.93		6.47
FA 559		6.29	5.34	5.78	5.7			25.7	4.16	4.38		26				10.4										6.94		4.72
FA 560		3.08	4.69	8.77	5.14			12.7	13.4	2.52		3.67				2.71										3.85		5.03
FA 561		22.1	5.86	5.55	5.75			7.37	5.36	3.8		3.67				6.34										5.64		2.95
FA 562		4.24	5.65	4.29	3.55			9.51	11.9	8.3		7.67				5.7										9.35		5.42
FA 563		16.8	4.16	22.6	13.6			8.72	4.4	4.57		12.2				2.77										2.15		7.12
FA 564		6.28	16.7	3.34	6.44			6.19	12.1	5.48		12.2				7.55										6.23		12.6
FA 565		14.2	13.6	4.61	4.32			3.5	10.2	3.86		6.23				16.4										4.91		11.1
FA 566		6.12	5.33	8.36	2.92			5.9	13.7	5.51		35.6				7.07										3.68		15.1
FA 567		5.77	13.9	7.07	3.69			38.1	6.83	4.51		2.71				3.97										16.8		3.33
FA 568		11.9	21.8	7.53	15.5			13.1	5.53	14.8		7.13				8.1										11.6		2.85
FA 569		12.2	6.23	6.59	2.79			5.21	9.74	7.69						7.36										17.6		4.52
FA 570		4.16	4.35	3.06	12.9			5.06	4.46	3.84						44.7										2.83		11.6
FA 571		22.5	7.26	18	4.05			5.27	14.1	5.65						3.27										13.9		11.2
FA 572		11.3	7.03	5.81	4.94			7.22	3.19	3.32						9.9										2.52		6.64
FA 573		33.1	4.49	2.55	3.96			5.32	2.9	6.47						4.73										2.54		5.61
FA 574		19	5.85	6.25	3.42			8.85	13.9	14.9						2.81										58.1		8.08
FA 575		14.6	11.1	4.09	10.5			7.67	6.42	8.96						5.64										4.41		2.85
FA 576		26.3	10.7	4.66	4.28			8.38	6.53	12.9						2.67										4.17		6.09
FA 577		11	5.9	3.25	4.68			2.32	7.71	5.64						6.78										10.3		6.64
FA 578		3.45	2.45	8.65	14.4			8.6	5.85	4.95						4.9										3.83		4.51
FA 579		3.44	7.73	13.3	7.13			14.4	30.2	9.21						15.1										10.6		4.51
FA 580		22.3	6.38	8.84	4.61			4.14	4.06	5.19						10.6										10		12.1
FA 581		12	5.07	29.6	12.6			8.28	3.51	2.69						5.35										21.5		51.8
FA 582		9.45	2.43	11.4	7.43			3.2	3.89	4.76						2.78										6.01		7.37
FA 583		12	6.12	11.6	3.51			5.41	3.68	17.9						6.52										52.5		5.06
FA 584		11.6	6.23	5.86	2.79			11.9	4.97	11.1						156										10.9		24
FA 585		3.6	6.64	3.43	3.28			3.18	2.17	5.52						3.77										17.6		9.52
FA 586		6.35	5.16	3.11	7.41			5.34	10.6	8.83						7.58										23.1		3.6
FA 587		10.7	31.4	18.7	2.82			10.5	8.04	4.64						4.18										2.59		4.41
FA 588		7.88	29	10.3	10.8			9.85	10	4.87						25.3										7.62		4.52
FA 589		10.2	3.92	12.5	26			5.88	7.78	3.8						17										4.61		7.16
FA 590		5.17	4.98	4.02	4.81			5.46	12	6.14						4.12										3.01		4.57
FA 591		13.1	16.6	6.24	10.8			8.88	5.45	4.47						10.6										3.91		3.44
FA 592		15.9	8.52	2.57	7.24			4.06	3.04	6.71						10										14.3		3.95
FA 593		9.25	6.1	10.3	4.6			8.85	14.4	5.12						2.76										4.22		2.98
FA 594		20.6	4.49	3.72	28.8			6.08	5.44	4.88						11										11.5		12.2
FA 595		10.5	4.2	6.23	14.7			7.04	8.3	5.21						27.5										7.34		9.62
FA 596		18.8	8.76	8.28	4.22			3.19	6.25	6.03						9.51										4.6		2.7
FA 597		29.8	4.17	9.89	8.06			2.24	18	6.77						4.69										4.12		12.1
FA 598		4.08	8.8	3.49	3.57			16.4	3.55	5.14						2.14										3.88		5.02
FA 599		5.47	3.77	2.7	2.21			3.97	7.96	9.95						3.46										4.91		6.21
FA 600		14.5	9.71	4.41	7.68			6.45	7.74	4.79						11.9										4.78		8.38
FA 601		8.96	3.04	5.54	2.66			7.15	4.53	3.36						7.37										5.01		14.3
FA 602		34.9	12.7	7.22	12.2			3.89	5.91	8.15						5.07										5.67		12.1
FA 603		23.5	14.3	3.84	3.78			2.96	7.51	6.43						7.69										4.89		11.1
FA 604		19.1	4.96	3.17	7			5.95	13.8	8.52						3.5										5.23		14
FA 605		6.4	5.91	5.09	3.7			9.14	8.3	6.81						50.4										5.08		4.58
FA 606		8.87	4.35	9.52	21			3.84	7.89	2.15						3.33										6.51		7.5
FA 607		6.92	6.38	8.16	2.58			3.54	13.7	6.88						40.8										4.77		3.36
FA 608		6.55	3.93	4.64	6.1			5.1	2.29	6.19						5.17										15.2		9.04
FA 609		8.11	11.2	29.6	3.75			3.54	19.5	46.1						6.51										18.9		8.11
FA 610		32.3	14.7	2.29	2.53			6.47	12.5	8.61						8.35										8.53		2.55
FA 611		12	9.34	6.79	5.43			6.31	21.1	4.15						16.7										2.93		2.57
FA 612		3.09	40.2	4.3	18.6			6.82	21.7	5.72						10.9										2.59		7.39
FA 613		3.3	2.28	3.54	6.25			3.63	4.64	4.24						35.9										12.6		3.78
FA 614		5.65	6.69	9	7			5.5	14.3	4.78						2.71										6.28		2.95
FA 615		5.05	6.61	11	4.3			3.73	43.9	6.65						4.08										66.2		9.1
FA 616		2.42	3.65	18.6	4.71			3.59	6.2	2.99						13.5										4.5		7.58
FA 617		19.5	6.52	10.6	7.53			7.54	2.72	3.33						14.7										11.2		3.15
FA 618		2.97	11	6.92	11.5			2.9	2.92	9.22						2.94										10.4		18.8
FA 619		10.2	5.06	3.17	6.38			9.28	4.62	7.46						8.24										9.34		46.4
FA 620		7.45	3.76	2.43	8.06			6.41	4.88	4.18						6.22										19.3		14.7
FA 621		29.5	4.99	2.77	7.26			9.69	2.95	4.37						14.1										43.9		2.65
FA 622		6.99	6.71	9.6	15.1			5.39	4.67	3.74						8.21										17.6		21.2
FA 623		2.98	6.05	6.26	3.09			30.5	11.6	3.35						62.4										17.6		12.2
FA 624		4.94	5.3	8.2	3.02			4.57	9.18	4.86						16.2										23.4		3.15
FA 625		16.4	2.85	7.05	6.03			4.24	10.5	8.04						4.18										2.84		2.38
FA 626		20	4.93	6.1	10.2			37.4	15.2	9.06						6.08										12.7		4.76
FA 627		7.3	25.1	6.11	26.3			24	4.22	3.65						8.69										6.44		3.78
FA 628		6.01	27.2	11.2	3.79			3.15	2.99	5.48						68.5										3.88		4.44
FA 629		7.49	5.82	9.05	2.7			10.6	12.9	3.03						3.68										2.67		4.21
FA 630		5.94	13.3	4.78	7.72			10.8	7.63	6.1						2.77										6.03		4.53
FA 631		5.15	7.75	5.81	10.3			13.6	20.2	2.77						6.34										12.2		12
FA 632		4.49	3.55	10.1	9.07			4.73	10.3	5.02						4.31										6.2		9.39
FA 633		17.3	7.64	7.33	6.5			7.09	6.63	35						5.18										4.76		11.9
FA 634		3.44	13.9	8.52	24.6			13.5	2.77	8.91						31.2										2.51		4.62
FA 635		9.55	10.9	2.94	10.3			4.77	2.9	13.3						2.5										3.88		3.72
FA 636		3.31	3.1	9.86	2.67			2.93	6.26	3.79						3.8										13.9		5.59
FA 637		18.8	5.35	8.1	5.45			13	21.1	2.8						11.4										5.22		4.36
FA 638		14.3	18.4	4.07	7.39			15.1	17.6	3.26						5.91										4.34		14.2
FA 639		5	11.4	5.91	3.42			5.66	8.2	5.44						12.5										7.02		13.3
FA 640		5.74	5.27	6.97	4.24			7.32	14.4	4.8						5.76										4.68		8.71
FA 641		5.02	3.65	2.22	7.86			9.93	5.4	12.8						2.73										4.31		7.46
FA 642		5.69	8.77	5.37	4.28			4.95	8.04	11.1						147										5.73		12.5
FA 643		16.3	12.9	5.46	19.9			7.7	4.95	3.12						6.14										6.22		11.4
FA 644		5.57	19.6	5.59	2.83			3.51	14	3.93						4.61										5.03		10
FA 645		5.84	5.63	11.8	12.8			6.61	7.33	7.56						30.1										15		19.2
FA 646		5.65	13.6	7.64	3.23			4.01	8.1	3.98						9.69										10.4		13.3
FA 647		9.37	18.3	4.48	10.1			8.57	2.98	6.16						15.5										6.8		5.11
FA 648		5.15	3.61	23.6	5.24			2.67	4.69	3.41						20.1										8.51		5.28
FA 649		29.7	6.35	5.35	4.36			7.32	10.2	11.2						15.1										8.72		26.8
FA 650		6.72	2.7	8.07	9.79			2.62	7.96	8.73						8.45										3.11		5.47
FA 651		10.6	5.75	9.2	5.19			13	10.3	2.48						10.6										4.71		8.08
FA 652		8.31	12.1	4.76	3.73			5.78	7.27	5.03						3.16										12.8		7.13
FA 653		30.2	2.89	5.92	15.4			11.1	13.5	4.07						4.42										7.72		3.63
FA 654		17.5	5.48	4.19	3.29			4.79	5.35	3.75						31.1										4.31		30.4
FA 655		10.1	3.27	5.17	7.18			4.49	13.8	6.96						4.83										8.58		9.13
FA 656		8.13	6.07	11.8	3.25			9.52	4.25	21.3						3.19										9.37		6.19
FA 657		2.37	25.9	16.3	3.28			6.2	5.43	3.47						9.14										6.88		2.64
FA 658		20.6	25.9	11.6	2.86			2.64	6.91	12.8						2.81										18.8		8
FA 659		2.7	3.14	10.7	2.45			4.32	7.79	6.38						4.06										45.4		4.02
FA 660		3.59	15.4	22.2	4.28			2.73	7.02	4.62						3.28										12.8		3.7
FA 661		12.6	2.85	10.1	12.2			2.88	15.8	6.29						7.98										19.5		6.48
FA 662		3.44	3.82	30.7	8.83			8.33	4.01	2.97						5.23										21.2		4.72
FA 663		4.89	7.58	13.5	14.9			2.26	8.78	6.38						70.3										11.4		3.71
FA 664		2.39	3.44	12.8	26.6			14.3	3.97	6.28						54										3.41		11.1
FA 665		6.57	9.48	5.41	4.58			5.61	9.02	8.23						8.67										5.38		8.36
FA 666		4.73	8.07	4.68	4.62			5.39	3.36	5.08						2.79										3.29		5.35
FA 667		9.03	5.09	5.77	7.86			7.6	17.4	7.08						37.5										4.79		10.8
FA 668		5.81	29.1	5.67	7.34			4.87	7.96	5.91						5.48										3.45		4.19
FA 669		2.66	10	9.6	4.14			6.39	8.51	9.27						4.15										3.82		5.74
FA 670		4.22	2.55	13.7	6.84			11	15.2	9.97						4.01										13		7.78
FA 671		4.11	4.23	7.91	20.7			4.01	4.68	3.74						5.27										2.44		6.76
FA 672		10.5	2.44	4.76	15.2			9.22	12.7	5.76						20.9										6.25		15.3
FA 673		4.11	3.99	9.23	2.29			9.03	11.8	3.46						5.69										5.61		17.7
FA 674		116	9.8	2.82	6.58			4.5	10.1	5.62						5.31										11.7		5.42
FA 675		6.48	11.6	8.43	3.46			4.79	21.7	5.74						5.8										4.05		3.49
FA 676		5.38	12.2	40.1	4.87			3	16.3	22.3						4.22										5.05		8.57
FA 677		10	4.24	6.63	8.94			4.57	6.67	7.41						11.6										6.24		5.51
FA 678		16.3	3.47	6.37	21.7			3.21	4.09	16.3						2.63										4.67		6.31
FA 679		9.56	4.58	17	6.44			3.53	7.23	2.67						3.27										5.5		9.03
FA 680		3.91	37.2	4.54	8.85			4.71	4.86	4.5						15.6										5.51		11.4
FA 681		9.1	2.53	4.16	8.84			7.63	44.9	5.63						4.65										4.02		10.7
FA 682		8.11	6.86	4.87	8			5.54	4.6	4.86						4.18										5.79		6.45
FA 683		4.72	5.88	12.6	6.48			5.82	4.82	3.7						6.34										6.03		4.78
FA 684		8.86	5.88	6.46	9.46			3.28	10.3	10.6						10.4										2.53		4.3
FA 685		2.52	11.6	13.9	7.67			34.6	2.21	7.37						5.02										13		18.9
FA 686		13.5	6.27	4.77	5.01			3.86	5.21	4.47						6.91										8.44		2.66
FA 687		6.03	3.01	11.3	3.14			7.13	7.17	3.69						20.5										9.98		32.9
FA 688		16.5	4.7	2.71	4.54			7.99	13.2	11.1						5.45										5.78		9.33
FA 689		4.73	22.2	4.04	4.67			8.67	3.6	9.42						12.1										6.1		28.4
FA 690		4.52	20.9	6.17	6.75			42.7	12.2	3.2						4.01										10.1		7.66
FA 691		2.87	15.2	5.03	4.56			3.25	10.2	5.6						15.3										6.15		2.43
FA 692		7.06	2.99	3.57	2.8			10.6	16.1	8.19						2.87										9.57		4.47
FA 693		4.11	4.51	3.79	4.5			4.79	11.3	19.7						13.6										3.55		4.09
FA 694		3.3	11.1	6.73	9.14			24.3	4.97	21.9						11.5										6.67		4.77
FA 695		6.97	4.05	8.73	5.15			6.03	11	8.54						4.31										42.1		3.6
FA 696		15	3.7	3.35	5.79			3.39	10.6	4.19						3.08										2.8		4.13
FA 697		6.69	21.3	5.61	2.64			9.55	5.51	4.19						3.03										6.89		4.72
FA 698		2.89	12.4	4.6	14.7			14.8	4.93	4.34						9.35										3.8		4.14
FA 699		4.62	5.33	17.4	4.06			12	19	5.55						4.98										11		4.75
FA 700		3.35	7.5	14.8	4.33			3.05	5.41	3.77						13.1										4.06		3.49
FA 701		5.35	4.17	4.11	3.05			2.48	11.8	5.54						6.82										12.8		10.8
FA 702		3.63	7.52	3.77	2.14			7.16	22.3	3.91						128										4.88		12.6
FA 703		3.72	6.36	11	7.76			5.63	3.15	4.32						3.74										11.6		5.45
FA 704		4.91	5.2	2.46	15.4			10.1	18.4	3.36						7.16										32.7		3.72
FA 705		8.04	2.65	11.5	24.3			4.11	3.36	3						5.09										9.2		4.24
FA 706		3.23	3.33	3.57	2.93			6	5.02	11.5						43.7										15.1		6.49
FA 707		4.7	9.81	12.2	4.11			3.71	4.62	8.27						3.68										16.2		13
FA 708		11.5	14.9	5.46	3.12			4.48	27.3	7.34						64.3										11.2		8.92
FA 709		4.52	5.37	3.74	8.91			6.53	4.61	7.53						6.59										4.5		5.51
FA 710		22.7	8.94	13	10.2			9.01	6.82	28.4						7.01										3.78		13.1
FA 711		67.5	5.78	3.5	4.52			4.73	2.53	17.9						7.02										4.32		8.37
FA 712		9.93	35.3	3.72	20.6			7	7.19	4.86						11.8										4.18		7.88
FA 713		4.8	6.14	7.78	13.5			9.37	22.9	6.8						39.6										3.21		7.9
FA 714		11.7	4.78	29.6	4.84			7.35	5.94	2.53						10.2										12.4		9.13
FA 715		5.15	20.3	2.62	4.65			4.61	12.2	3.75						4.51										4.9		5.38
FA 716		5.38	6.08	3.47	7.14			3.33	7.65	6.04						2.93										4.8		5.43
FA 717		10.7	5.64	2.44	6.06			8.87	10.3	3.95						3.87										14.4		4.48
FA 718		3.6	5.43	3.39	5.04			5.8	4.49	4.81						9.2										6.33		4.96
FA 719		3.82	4.54	11.1	4.42			8.73	10.9	4.13						12.6										5.63		2.35
FA 720		4.36	16.3	7.88	28.7			3.15	12.6	6.56						6.44										5.35		16.8
FA 721		23.5	3.17	12.8	3.25			10.3	4.96	6.33						3.86										4.66		16.3
FA 722		2.92	13.7	4.81	9.28			3.87	5.24	8.04						7.06										6.24		3.35
FA 723		2.67	5.53	6.75	7.16			2.36	9.2	4.06						10.6										3.66		3.02
FA 724		6.83	4.4	6.08	13.1			4.86	3.58	15.1						8.02										5.12		2.51
FA 725		19.3	5.97	4.67	4.5			5.77	4.42	7.03						5.14										4.75		2.8
FA 726		2.41	2.59	9.41	3.92			7.61	4.8	5.36						3.34										6.39		43
FA 727		4.75	12.6	3.63	5.44			6.17	7.37	4.61						12.6										5.51		7.11
FA 728		10.6	2.52	2.63	5.12			5.29	4.08	2.74						12.3										9.92		3.45
FA 729		9.06	4.87	6.69	4.79			4.92	8.64	3.91						4.23										11.1		4.83
FA 730		11	3.64	4.91	9.96			4.92	3.09	4.07						17.6										8.39		5.09
FA 731		7.13	8.85	7.43	3.69			5.59	6.22	4.09						7.55										6.14		7.92
FA 732		4.21	36.4	5.82	4.78			11.8	6.98	5.11						85.7										3.29		5.63
FA 733		3.9	7.46	8.19	3.19			2.77	4.71	3.4						45.7										11.6		4.23
FA 734		6.73	8.69	10.7	9.83			6.25	13.7	16.2						9.05										10.3		9.07
FA 735		24.2	6.82	13.7	6.94			4.26	6.17	4.94						24.1										12.3		7.62
FA 736		8.26	4	7.09	3.43			2.98	2.38	5.1						6.52										3.3		2.54
FA 737		30.8	2.42	4.4	4.4			7.56	6.96	4.18						11.8										40.2		8.25
FA 738		3.78	6.93	11.9	6.3			6.51	4.83	2.3						44.6										5.98		6.66
FA 739		21.3	9.19	3.23	3.17			6.57	4.82	21.8						4.58										3.88		2.87
FA 740		9.82	3.65	6.53	30			10.2	6.44	6.12						3.52										3.28		5.22
FA 741		4.86	9.94	5.1	16.7			2.83	10.2	2.73						19.7										3.14		5.92
FA 742		21	17.1	7.02	3.62			2.75	22.6	3.53						8.06										6.59		15.5
FA 743		2.84	7	3.52	24.2			3.64	15.1	4.14						4.65										37.1		10.4
FA 744		22.6	17.1	6.34	6.26			3.2	4.67							3.15										4.68		5.4
FA 745		8.12	32.8	9.81	8.12			5.16	6.65							9.6										13.4		11.3
FA 746		20	12.2	12.3	10.8			24.8	8.41							33.2										36.3		6.76
FA 747		4.48	5.04	5.19	4.05			5.86	28.4							3.58										15.1		10
FA 748		11	22.7	4.12	5.35			6.93	5.31							6.86										15.2		8.5
FA 749		3.83	9.28	19.6	13.8			8.83	4.19							2.67										6.43		10.9
FA 750		14.9	6.69	8.79	10.5			3.16	6.18							5.2										3.22		16
FA 751		13.2	4.77	6.63	7.99			6.72	8.36							9.37										4.61		5.68
FA 752		15.1	4.09	8.86	6.58			4.85	9.31							3.23										3.12		4.34
FA 753		14.9	2.73	5.92	2.75			7.39	12.8							19.6										6.38		5.54
FA 754		6.99	8.13	6.64	6.02			34.4	8.89							5.28										14.1		31.1
FA 755		14.7	17.9	5.26	2.68			7.4	6.02							7.65										3.56		3.1
FA 756		2.18	3.96	3.78	7.3			6.74	2.82							4.41										7.26		41
FA 757		13.6	11.2	5.81	26.6			3.13	4.08							3.4										6.86		7.7
FA 758		3.33	6.72	2.43	4.4			24.4	8.47							3.24										7.78		2.33
FA 759		3.65	2.74	4.3	4.9			7.21	5.46							5.06										5.88		3.73
FA 760		5.65	3.08	9.92	26.5			2.29	4.53							4.84										6.84		4.37
FA 761		20.7	7.93	4.13	12.3			9.39	17.9							2.85										5.28		5.11
FA 762		4.82	6.82	13.8	7.5			8.59	6.65							4.61										3.03		8.23
FA 763		8.54	37.4	7.7	5.51			5.47	12.4							4.23										7.04		2.69
FA 764		10.5	3.23	15	4.71			3.87	29.1							5.25										4.92		6.9
FA 765		5.47	4.99	10.7	4.57			17.3	4.8							57.2										4.07		8.95
FA 766		14.7	5.06	3.84	6.58			6.08	6.02							6.98										9.29		4.52
FA 767		4.75	3.29	10.2	6.56			7.39	5.17							43.4										10.9		2.03
FA 768		8.9	2.76	8.73	3.62			8.73	8.24							3.46										8.87		7.6
FA 769		8.46	3.78	36.5	8.53			10.2	19.1							7.54										8.38		4.16
FA 770		12.9	11.2	15.8	4.93			3.97	7.42							23.9										4.48		3.9
FA 771		7.9	4.02	7.14	6.28			8.02	13.7							14.4										9.78		3.09
FA 772		8.94	9.77	5.59	2.65			5.83	3.29							4.74										3.8		4.6
FA 773		6.54	12.8	4.32	11.9			3.77	4.66							5.33										3.2		3.81
FA 774		10.1	6.11	2.89	10.8			4.95	14.3							145										4.17		4.87
FA 775		12.8	5.61	13.8	17.7			5.49	12							23.4										31.3		9.88
FA 776		39.9	7.95	9.15	25.1			13.8	10.5							5.33										4.17		6.44
FA 777		7.93	32.1	2.75	11.5			3.05	3.99							4.95										10.9		2.82
FA 778		30.9	11.3	2.21	7.18			8.55	4.45							4.15										4.67		14.1
FA 779		4.99	2.99	8.66	5.72			9.21	7.8							5.34										38.2		4.5
FA 780		11.9	15.1	9.04	6.9			8.51	32.6							6.75										4.19		6.97
FA 781		63.1	5.95	4.19	21.4			11.9	6.1							6.9										16.3		4.05
FA 782		16	8.03	6.85	6.76			20.7	12.7							20.8										37.5		7.81
FA 783		2.84	5.8	7.46	9.24			4.15	12							5.97										17.7		9.78
FA 784		5.94	13.2	4.62	5.02			21.1	10.5							21.8										21.5		5.63
FA 785		14.5	14.4	3.93	9.19			4.84	7.75							6.01										6.33		8.19
FA 786		12.2	13.2	4.07	21.4			8.57	12.3							8.49										3.48		3.74
FA 787		7.17	3.15	3.14	4.64			2.25	14.7							12.3										3.44		5.8
FA 788		5.83	8.23	3.96	17.8			6.48	3.06							6.95										4.54		5.33
FA 789		10.6	38.2	9.54	7.87			3.88	3.16							7.91										6.7		5.19
FA 790		6.76	4.96	7.16	8.69			6.58	4.93							11.3										4.09		33.9
FA 791		2.63	5.39	4.42	5.32			6.73	9.21							2.57										2.46		37
FA 792		3.58	6.03	6.4	12.8			4.89	4.39							5.93										14.1		6.61
FA 793		25.4	9.11	9.7	6.6			5.98	6.77							35.3										3.14		6.54
FA 794		3.13	15.1	6.99	2.45			4.66	15.7							57.6										14.1		4.03
FA 795		4.12	5.11	3.64	5.24			9.32	7.78							15.5										11.1		3.15
FA 796		8.96	11.2	6.44	6.93			5.37	4.94							24.1										6.39		4.85
FA 797		7.33	4.11	8.7	6.47			4.52	7.81							14.6										3.53		5.35
FA 798		16.4	6.51	16	3.04			4.94	3.79							16.4										6.83		8.47
FA 799		4.54	29.6	3.76	10.4			2.36	6.3							21.9										5.34		5.43
FA 800		14.1	13.3	10.3	2.82			5.45	8.69							12.5										6.98		3.25
FA 801		8.17	12.7	3.82	6.67			6.41	4.21							7.12										6.18		8.12
FA 802		5.96	9.31	9.21	4.81			9.4	11.7							30										9.99		6.98
FA 803		10.7	3.72	4.82	12			8.24	8.12							4.66										9.18		4.97
FA 804		6.14	2.38	10.9	3.04			7.41	10.1							3.41										10.7		7.48
FA 805		2.89	16.9	6.53	11.2			13.6	24.1							8.98										4.13		8.28
FA 806		3.43	6.69	8.19	4.71			4.76	17.2							5.73										7.7		5.82
FA 807		2.57	4.45	7.47	17.8			2.48	14.6							12										3.95		5.3
FA 808		17.4	3.73	21	4			5.87	41.1							11.4										4.38		7.25
FA 809		4.3	4.54	8.77	19.3			5.42	6.74							13.6										5.49		15.1
FA 810		7.83	4.78	8.15	2.73			15.9	8.44							6.19										8.28		11.6
FA 811		11.8	4.09	10.1	13.3			8.46	6.96							4.05										2.56		8.26
FA 812		2.44	5.25	6.87	7.15			21.4	3.86							8.29										33.9		5.59
FA 813		43.1	6.48	11.1	2.46			10.5	7.53							2.86										5.04		7.17
FA 814		5.96	3.93	2.81	8.05			4.95	2.97							4.1										11.4		9.99
FA 815		12.9	27.5	9.96	3.77			21	13.1							6.34										4.52		14.6
FA 816		3.48	5.42	5.74	13.6			17	9.62							4.76										38.1		4.12
FA 817		15.1	4.97	9	5.05			5.08	7.25							4.31										5.18		3.39
FA 818		14.2	3.91	2.8	2.58			9.55	10.9							4.12										12.9		3.01
FA 819		3.8	7.22	2.68	11.4			6.97	20.2							6.37										33.3		2.46
FA 820		9.89	8.11	10.3	2.62			5.99	8.48							6.27										17.3		33.8
FA 821		8.69	7	4.86	5.19			8.77	3.19							5.25										22.8		9.68
FA 822		3.39	11	5.17	7.07			6.07	27.5							3.93										5.46		13.9
FA 823		10.9	13.1	3.62	7.74			14	12.5							2.38										6.77		23.9
FA 824		3.38	9.09	5.83	18.2			5.77	15.2							2.93										5.1		16.8
FA 825		6.1	3.96	6.29	6.85			5.89	2.71							11.2										2.76		2.87
FA 826		5.01	15	7.69	20			6.65	4.51							3.97										4.45		3.77
FA 827		5.92	29.6	8.55	3.77			5.38	6.24							7.93										8.38		5.1
FA 828		6.13	7.84	4.26	13.6			6.03	12.5							6.69										10.9		3.15
FA 829		5.88	11.8	7.41	2.38			4.63	7.3							43.5										3.64		8.39
FA 830		3.23	6.33	10.6	6.16			2.35	12.2							3.91										16.1		4.09
FA 831		12.6	4.81	7.66	10.1			13.9	20.1							5.9										10.6		5.61
FA 832		5.57	19	8.66	3.35			12.2	4.39							43.5										6.29		7.97
FA 833		6.16	3.31	4.3	4.93			5.1	14.5							4.42										6.52		4.25
FA 834		2.4	6.79	9.02	7.46			16.8	4.66							3.99										4.41		4.73
FA 835		5.38	7.16	10	5.74			3.19	2.52							3.18										5.68		12
FA 836		6.81	10.2	6.76	6.97			6.24	13.9							7.4										5.16		6.12
FA 837		5.09	6.88	3.81	8.61			2.92	2.77							3.76										11.1		4.84
FA 838		4.55	5.07	4.31	3.46			3.16	8.7							13.3										10		9.59
FA 839		5.02	48.5	10.3	6.11			5.37	4.89							4.61										9.12		4.12
FA 840		6.66	4.86	7.36	15.9			3.2	7.82							12.3										7.59		3.62
FA 841		3.34	4.78	4.37	7.77			5.32	47.6							2.75										4.8		13.9
FA 842		3.55	4.89	3.87	4.22			6.93	5.28							9.56										4.77		5.16
FA 843		4.38	13.3	2.41	6.11			5.79	17.6							5.77										3.31		7.02
FA 844		7.6		11.9	9.47			10.2	9.08							24.3										6.95		7.48
FA 845		12.4		3.96	9.86			14	11.3							144										9.12		4.12
FA 846		4.5		6.17	3.23			9.97	13.8							5.11										2.78		7.71
FA 847		3.33		8.59	2.68			5.22	2.91							9.32										3.77		3.76
FA 848		3.91		3.5	11.7			11.4	4.44							7.21										4.25		5.79
FA 849		4.13		4.54	4.22			7.16	2.85							3.03										2.65		3.87
FA 850		9.36		10.2	5.53			7.5	8.22							8.66										3.35		38.3
FA 851		10.5		7.19	15.3			9.67	3.84							19.3										11.8		16.8
FA 852		4.5		9.87	19.1			4.45	7.12							5.22										31.6		23.6
FA 853		2.63		5.43	7.94			8.42	6.73							6.41										13.6		7.3
FA 854		7.02		2.67	11			3.44	6.76							10.4										20.6		3.65
FA 855		3.75		12.5	21.5			9.36	5.5							8.4										5.16		4.4
FA 856		7.26		8.51	2.79			8.19	11.4							30.1										7.57		5.72
FA 857		8.66		6.28	6.34			6.92	3.77							2.74										5.6		6.07
FA 858		2.41		12.9	11.1			5.35	4.36							12.9										2.79		4.02
FA 859		19.5		3.41	2.86			4.97	8.36							3.95										4.03		9.3
FA 860		64.6		7.8	11.6			5.58	7.57							10.4										14.5		5.05
FA 861		4.11		3.04	10.1			3.26	2.23							4.61										4.94		4.15
FA 862		9.66		4.24	15.5			6.25	5.13							7.04										4.78		5.95
FA 863		5.08		3.78	4.2			12.3	2.34							2.3										2.79		5.25
FA 864		6.55		9.77	17.9			8.62	8.11							8.99										6.67		7.61
FA 865		33.3		3.04	6.37			20.3	8.83							71.4										9.73		4.65
FA 866		2.99		4.89	4.23			29.2	25.1							3.96										13.5		9.5
FA 867		5.73		7.21	6.52			3.89	5.48							46										5.74		5.12
FA 868		20.7		10.7	4.8			6.83	12.9							12.9										7.15		3.4
FA 869		15		10.1	13.1			7.16	3.3							7										4.01		13.3
FA 870		7.27		6.72	6.29			10.1	40.1							3.48										4.28		5.82
FA 871		20.5		8.54	4.54			6.25	5.26							6.38										3.95		5.02
FA 872		4.25		8.48	10.6			8.51	4.34							8.15										4.65		9.72
FA 873		6.87		14.3	6.59			3.65	6.57							14										5.38		7.02
FA 874		15.7		6.07	3.51			8.95	7.74							2.33										11.6		9.25
FA 875		5.4		7.27	9.78			4.47	12.3							2.4										10.9		6.96
FA 876		17.1		2.76	17.2			10.5	12.3							13.8										9.46		4.1
FA 877		10.2		2.87	2.37			4.39	10.1							7.96										4.41		5.22
FA 878		7.93		4.79	5.91			3	10.9							8.49										8.3		5.17
FA 879		13.6		4.84	14.7			12.1	5.05							11.4										4.44		4.02
FA 880		14.4		4.12	11.8			6.4	5.43							17.2										3.06		16.1
FA 881		27.6		30	6.78			6.73	7.09							4.69										4.75		8.99
FA 882		6.8		5.7	11.6			7.89	7.32							5.41										7.22		9.74
FA 883		29.3		7.57	18.3			6.86	6.28							20.5										7.33		11
FA 884		2.91		4.16	5.61			7.98	6.08							8.37										37.9		11.6
FA 885		6.84		5.31	7.2			6.87	21.3							5.13										3.79		24.8
FA 886		18.3		12	25.9			4.04	17							13.1										2.53		6.36
FA 887		21.3		7.73	10.4			7.05	6.21							9.28										30.7
FA 888		9.8		16	2.53			2.56	5.23							5.73										3.76
FA 889		7.75		7.65	9.29			4.93	8.46							12.8										15
FA 890		5.39		4.22	3.44			8.66	5.46							8.57										33.1
FA 891		21.2		5.85	17.4			4.12	22.1							6.64										16.7
FA 892		12.8		11.7				4.67	2.7							5.6										21.7
FA 893		9.18		11.9				4.78	3.08							11
FA 894		17		2.47				8.06	4.46							3.76
FA 895		100		2.18				2.31	4.6							4.43
FA 896		9.38		12.4				8.37	19.8							3.79
FA 897		17.3		7.55				16.5	15.5							2.76
FA 898		15.2		3.62				4.59	3.33							14.5
FA 899		5.55		3.99				13.7	11							24.7
FA 900		11.4		10.9				11.9	5.08							5.13
FA 901		4.38		8.89				6.75	10.5							58.4
FA 902		6.5		7.14				3.98	5.15							3.73
FA 903		2.26		10.7				4.36	11.2							3.85
FA 904		6.42		2.55				9.5	51.2							6.66
FA 905		15.4		4.52				2.57	3.15							5.26
FA 906		3.86		9.12				3.9	13.1							59.4
FA 907		5.99		2.48				4.87	10.6							11.7
FA 908		11.3		10.3				9.12	9.9							138
FA 909		25.2		5.31				6.4	11.7							6.11
FA 910		12.7		5.93				6.26	13.9							2.46
FA 911		3.6		2.65				79.1	3.38							2.49
FA 912		11.4		5.53				4.81	8.1							22.2
FA 913		2.98		5.87				11.3	5.32							15
FA 914		3.23		3.16				13.4	8.33							6.87
FA 915		4.91		5.82				12.6	4.06							14
FA 916		22.3		3.7				13.3	5.62							9.55
FA 917		3.9		22.8				3.33	2.6							5.34
FA 918		4.58		4.03				2.42	5.01							10.7
FA 919		7.52		2.76				3.44	3.8							3.69
FA 920		24.3		4.84				7.22	5.89							5.62
FA 921		6.14		4.74				8.04	5.39							5.99
FA 922		15.8		5.66				3.88	5.25							7.91
FA 923		10.4		15.3				16.1	9.62							8.74
FA 924		5.66		2.88				3.87	7.88							10.7
FA 925		5.03		17.8				21.3	3.9							4.16
FA 926		24.4		4.6				7.37	3.86							5.35
FA 927		12.3		7.3				4.6	5.57							9.16
FA 928		12.2		4.64				4.83	7.16							4.61
FA 929		17		7.13				2.58	6.24							5.23
FA 930		8.98		10.5				7.42	44.3							8.05
FA 931		9.24		4.55				5.63	5.19							5.43
FA 932		3.68		9.57				8.35	7.28							9.54
FA 933		19.4		4.62				12.9	5.52							9.49
FA 934		5.76		8.02				8.18	10.6							51
FA 935		10.5		10.1				11.1	14.9							14.7
FA 936		5.17		6.22				5.63	2.82							7.61
FA 937		9.28		8.63				11.2	6.18							42.5
FA 938		3.19		4.72				3.93	3.16							5.98
FA 939		7.94		2.92				3.09	10.7							21.2
FA 940		8.76		3.72				11.5	4.35							3.83
FA 941		7.76		4.32				5.67	11.2							6.36
FA 942		4.8		7.77				12.8	13.8							18.6
FA 943		3.75		2.21				3.7	7.59							7.21
FA 944		8.28		26				2.84	4.63							9.28
FA 945		17.9		6.88				6.33	4.93							5.68
FA 946		12.6		2.42				2.7	5.46							5.37
FA 947		4.13		3.03				5.79	3.38							2.54
FA 948		3.28		4.59				2.85	10.2							16.3
FA 949		3.41		3.99				14	22.3							3.14
FA 950		5.9		12.6				4.17	16.3							6.14
FA 951		23.3		6.59				7.44	9.46							9.82
FA 952		27.8		3.62				5.25	13.1							14.6
FA 953		7.9		6.83				4.98	5.21							3.06
FA 954		37.1		9.25				3.31	6.98							6.43
FA 955		4.96		2.28				26.8	14.9							4.28
FA 956		2.56		7.64				15.9	14.8							6.32
FA 957		3.15		4.59				24.9	5.37							2.59
FA 958		5.05		9.95				14.8	2.55							5.25
FA 959		4.16		2.81				10.6	13.3							12
FA 960		8.15		8.78				3.21	3.73							6.51
FA 961		10.5		9.97				4.86	11.5							6.59
FA 962		4.39		3.66				16.2	7.06							6.09
FA 963		5.08		6.41				13.5	2.45							5.78
FA 964		24.4		3.86				7.51	16.6							5.78
FA 965		5.38		18.1				4.26	7.88							36.6
FA 966		22.7		14.3				8.7	3.43							13.3
FA 967		2.4		10.5				6.97	3.93							63.3
FA 968		4.85		4.02				3.92	5.9							45.2
FA 969		4.61		4.51				2.66	11.8							10.6
FA 970		9.08		5.68				17.3	52.2							4.26
FA 971		9.42		4.28				8.38	4.08							17.2
FA 972		4.86		2.17				12.8	11.6							4.61
FA 973		7.89		3.15				13.9	7.58							18
FA 974		3.91		6.16				2.74	12.5							10.4
FA 975		4.32		5.15				3.49	14.5							4.71
FA 976		35.6		3.31				14.8	4.87							181
FA 977		3.3		5.14				6.73	7.38							7.75
FA 978		2.91		39.9				8.84	12.2							2.51
FA 979		6.1		4.88				4.52	3.92							13.7
FA 980		6.4		6.28				8.72	8.01							7.1
FA 981		4.59		3.14				5.62	6.2							16.9
FA 982		9.18		6.56				3.02	5.25							6.71
FA 983		3.18		2.95				8.78	7.36							2.75
FA 984		8.38		5.42				3.09	4.17							5.09
FA 985		4.17		11				2.44	3.17							3.38
FA 986		5.51		4.64				2.72	10.4							4.9
FA 987		7.68		3.83				5.04	7.81							13.6
FA 988		5.23		4.13				3.58	2.28							8.64
FA 989		4.66		3.46				2.82	5.38							6.76
FA 990		7.73		8.07				3.31	34.8							5.18
FA 991		5.52		7.34				7.39	5.96							8.85
FA 992		6.47		3.93				2.39	3.3							5.06
FA 993		5.9		7.38				2.85	3.84							6.33
FA 994		10.8		10.8				9.89	5.06							7.92
FA 995		7.88		2.87				6.43	9.44							9.12
FA 996		6.15		10.5				4.51	5.04							8.83
FA 997		4.31		3.45				5.58	16.6							6.6
FA 998		13.8		5.4				10.3	12.3							3.43
FA 999		20.5		5.61				6.8	12.3							9.45
FA 1000		16.9		12				8.23	9.53							37.8
FA 1001		18.1		5.03				8.95	6.38							12.9
FA 1002		6.95		16.9				4.19	8.58							11.9
FA 1003		6.44		4.67				10.4	6.26							44.9
FA 1004		7.5		13.1				8.35	6.08							3.21
FA 1005		3.73		6.92				8.36	5.82							2.41
FA 1006		7.79		2.46				20.5	4.51							7.14
FA 1007		3.53		2.59				5.95	3.05							4.37
FA 1008		6.98		5.11				7.11	6.4							15.2
FA 1009		16.3		6.92				2.65	19.8							4.87
FA 1010		6.26		5				12.6	16.7							4.72
FA 1011		6.54		3.38				10.1	11.8							58.4
FA 1012		4.24		5.16				11.6	18.9							2.42
FA 1013		6.82		34.5				7.1	5.86							2.98
FA 1014		17		4.14				8.96	8.03							23.3
FA 1015		2.91		4.26				2.64	4.35							2.49
FA 1016		10.4		2.4				18.3	4.91							5.74
FA 1017		7.93		8.67				6.13	12.2							8
FA 1018		10.8		3.92				5.29	7.34							16.7
FA 1019		4.32		3.13				10.1	4.66							8.49
FA 1020		5.09		7.72					17.5							3.4
FA 1021		12.3		7.07					5.25							5.4
FA 1022		4.74		2.71					7.22							2.9
FA 1023		6.88		3.06					12.1							11.7
FA 1024		2.28		9.7					71.6							7.79
FA 1025		6.14		12.5					2.57							3.95
FA 1026		7.68		2.3					12							6.03
FA 1027		5.53		12.6					7.2							4.78
FA 1028		13.3		3.97					8.63							5.22
FA 1029		48.2		4.67					10.9							13.8
FA 1030		16.5		17					11.8							4.98
FA 1031		4.71		6.7					14.7							7.27
FA 1032		8.4		5.43					4.3							7.11
FA 1033		51.1		8.79					5.03							3.78
FA 1034		4.67		6					12.3							6.75
FA 1035		3.43		6.99					5.24							8.75
FA 1036		18.8		8.17					6.47							5.35
FA 1037		8.97		3.93					3.02							4.76
FA 1038		9.89		9.04					3.79							57.6
FA 1039		9.61		14.2					3.45							30.5
FA 1040		2.73		15.9					5.96							3.91
FA 1041		3.44		20.2					4.67							8.99
FA 1042		19.7		21.1					4.59							17.7
FA 1043		5.98		5.58					3.35							4.18
FA 1044		13.8		6.52					2.4							6.86
FA 1045		5.78		5.3					8.01							12.8
FA 1046		10.2		5.17					16.7							201
FA 1047		105		5.56					5.23							5.11
FA 1048		10.3		18					4.24							8.31
FA 1049		4.69		4.65					3.86							12.4
FA 1050		29.2		6.96					12							7.42
FA 1051		4.91		4.42					18.2							3.03
FA 1052		12.6		6.02					11.3							4.12
FA 1053		36		6.78					4.84							17.1
FA 1054		3.15		18.8					5.7							8.84
FA 1055		8.53		2.88					9.38							11.3
FA 1056		7.52		6.95					12.7							3.52
FA 1057		4.7		2.34					2.86							16.4
FA 1058		4.07		8.77					4.06							7.52
FA 1059		9.07		7.13					3.52							11.9
FA 1060		3.67		2.63					7.52							12.1
FA 1061		5.52		11.4					4.72							14.2
FA 1062		4.05		3.92					19.6							30.5
FA 1063		4.12		2.44					13.1							2.59
FA 1064		15.4		12.2					9.66							10.5
FA 1065		4.8		11					19.7							78.5
FA 1066		10.1		5.87					3.5							28.5
FA 1067		15.1		7.23					17							3.35
FA 1068		12.1		8.99					5.51							7.24
FA 1069		8.94		9.11					3.6							5.09
FA 1070		9.94		3.44					10.2							5.68
FA 1071		15.1		8.28					2.02							8.63
FA 1072		21.1		13.5					4.91							11.5
FA 1073		16.6		11.2					23.3							5.49
FA 1074		7.29		4.87					9.77							5.93
FA 1075		33.2		3.17					3.29							3.6
FA 1076		13.1		4.64					22.9							11.9
FA 1077		5.61		24.9					3.96							6.19
FA 1078		4.91		13.7					30.6							11.9
FA 1079		17.6		7.21					8.49							2.53
FA 1080		20.3		16.4					2.76							7.76
FA 1081		6.08		4.23					5.46							26.5
FA 1082		9.41		21					2.27							14.8
FA 1083		12.4		19.4					13.8							23.9
FA 1084		12.6		6.02					25.2							11.7
FA 1085		3.44		4.93					3.03							2.72
FA 1086		9.14		5.23					14.6							20.3
FA 1087		3.57		3.31					8.23							5.24
FA 1088		4.92		6.96					8.77							3.22
FA 1089		5.96		9.57					7.77							4.27
FA 1090		5		4.59					13.3							2.66
FA 1091		12.6		5.29					16.6							30
FA 1092		6.59		26.3					6.43							23
FA 1093		7.47		4.21					10.1							18.7
FA 1094		7.19		7.25					4.49							36.6
FA 1095		17.3		2.59					3.45							9.86
FA 1096		3.95		11					4							16.2
FA 1097		5.16		2.82					6.17							11.8
FA 1098		3.03		5.08					5.2							6.77
FA 1099		2.77		4.75					4.07							5.67
FA 1100		15.1		13.6					17.7							240
FA 1101		12.4		9.59					8.01							6.78
FA 1102		11.1		10.5					3.33							25
FA 1103		5.79		8.81					15.9							36.7
FA 1104		6.8		7.5					3.43							3.41
FA 1105		5.67		13.8					5.55							5.01
FA 1106		12		14					7.73							12.6
FA 1107		3.84		2.7					2.83							6.18
FA 1108		3.14		11.1					3.89							6.87
FA 1109		21.3		5					15.9							2.41
FA 1110		6.81		12.6					14.8							24
FA 1111		3.64		8.5					10.1							5.81
FA 1112		5.07		11.4					7.69							10.9
FA 1113		9.64		7.78					9.34							2.52
FA 1114		17.2		5.73					2.17							16.2
FA 1115		10.9		9.36					3.7							4.74
FA 1116		6.95		8.7					2.62							3.58
FA 1117		22.6		8.16					4.97							27.8
FA 1118		8.58		9.31					3.32							10.8
FA 1119		9.16		24.8					4.59							5.07
FA 1120		3.05		18.8					3.55							45.5
FA 1121		63.5		6.01					5.56							14.9
FA 1122		7.39		9.68					7.3							4.29
FA 1123		2.54		4.37					21.2							3.77
FA 1124		9.49		12.8					13.9							4.71
FA 1125		3.77		3.81					24.1							13.2
FA 1126		3.99		16.6					3.02							2.54
FA 1127		7.8		7.29					16.7							5.94
FA 1128		7.19		6.43					6.68							4.34
FA 1129		6.05		2.39					5.76							6.77
FA 1130		3.79		7.48					4.51							9.46
FA 1131		6.75		3.72					3.28							4.84
FA 1132		4.2		3.41					4.53							15.4
FA 1133		5.37		2.54					16.2							27
FA 1134		4.49		6.61					11.9							14.8
FA 1135		8.03		18.3					5.78							9.14
FA 1136		6.92		4.14					20.8							7.33
FA 1137		4.09		9.53					8.12							6.01
FA 1138		6.95		3.46					10							10.6
FA 1139		4.61		3.92					9.71							8.5
FA 1140		50.1		7.33					17.1							6.27
FA 1141		3.27		2.96					48.1							3.05
FA 1142		4.37		2.77					2.67							2.74
FA 1143		2.99		11.7					12.8							7.34
FA 1144		2.71		5.11					5.15							7.65
FA 1145		9.45		2.85					3.7							25.9
FA 1146		3.67		9.01					6.55							25.3
FA 1147		3.43		4.9					10.8							26
FA 1148		13.1		9.7					15.6							6.96
FA 1149		2.73		12					4.73							7.02
FA 1150		4.8		9.36					2.09							9.23
FA 1151		16.3		10.2					4.17							3.29
FA 1152		20.9		7.88					3.53							5.1
FA 1153		22.3		3.74					3.71							137
FA 1154		13.5		5.57					18.2							14.2
FA 1155		7.59		10.2					4.21							6.87
FA 1156		8.89		4.72					3.14							20.4
FA 1157		33.2		5.93					9.23							7.73
FA 1158		16		11.8					13.1							6.71
FA 1159		9.26		12.8					5.57							3.23
FA 1160		3.93		13.5					7.69							5.28
FA 1161		47.4		18.1					11.9							4.41
FA 1162		3.72		5.18					6.58							3.7
FA 1163		23.2		11.4					8.6							14.7
FA 1164		3		25.4					4.12							10
FA 1165		7.18		14.5					13.7							5.25
FA 1166		8.5		11					7.34							23.2
FA 1167		10.5		11.4					3.6							14.9
FA 1168		4.57		20.2					2.99							22.1
FA 1169		5.7		6.13					7.46							25.8
FA 1170		3.48		5.5					12.4							5.43
FA 1171		3.36		16.4					6.48							10.3
FA 1172		10.3		5.85					7.73							23.7
FA 1173		10.9		4.51					17.1							107
FA 1174		2.42		6.16					9.21							16.1
FA 1175		2.84		6.1					2.92							4.67
FA 1176		4		7.78					23							4.74
FA 1177		8.16		3.27					3.68							14
FA 1178		6.86		9.03					4.46							3.05
FA 1179		3.49		5.69					15.1							8.24
FA 1180		12.5		15					5.02							2.73
FA 1181		10.1		8.82					17.2							4.18
FA 1182		5.65		3.38					10.6							3.56
FA 1183		6.24		4.58					4.34							12.9
FA 1184		154		2.81					17.5							6.66
FA 1185		4.38		13.3					27.5							4.82
FA 1186		34.8		12.9					2.7							3.19
FA 1187		17.6		5.33					19.4							6.3
FA 1188		2.62		10.1					10.1							2.63
FA 1189		8.96		9.03					21.1							4.38
FA 1190		22.7		5.28					16							8.02
FA 1191		5.27		2.41					3.1							3.08
FA 1192		6		5.44					3.56							9.02
FA 1193		2.71		12.5					7.82							5.32
FA 1194		10.4		8.83					16.3							6.47
FA 1195		6.84		9.21					4.52							11.5
FA 1196		22.1		9.55					4.31							17.8
FA 1197		5.18		3.56					2.27							4.36
FA 1198		14.6		10.7					23							19.2
FA 1199		25.4		11.4					2.51							5.45
FA 1200		9.68		16.9					3.72							14.3
FA 1201		12.9		13					8.26							3.22
FA 1202		10.2		35.8					7.87							8.07
FA 1203		14.9		11.6					2.28							10.8
FA 1204		3.63		24.1					3.44							7.28
FA 1205		11.4		33.6					13.1							5.22
FA 1206		22.1		2.63					5.86							8.42
FA 1207		9.8		6.85					9.82							6.02
FA 1208		5.27		6.31					3.84							2.63
FA 1209		14		6.94					4.78							8.27
FA 1210		8.37		4.45					3.18							2.67
FA 1211		11		4.75					2.66							7.66
FA 1212		15.2		5.24					6.3							19.3
FA 1213		17.1		2.48					3.16							3.39
FA 1214		18.8		3.91					6.31							8.95
FA 1215		6.23		8.42					2.44							9.35
FA 1216		6.57		12.1					3.54							2.36
FA 1217		8.21		4.69					6.54							252
FA 1218		18.9		7.97					8.83							3.1
FA 1219		3.3		4.32					6.57							16.6
FA 1220		6.6		4.74					15.5							6.07
FA 1221		2.94		3.63					12.5							10.3
FA 1222		6		7.16					10.6							10.1
FA 1223		7.34		5.35					4.65							135
FA 1224		5.04		9.8					16.8							9.86
FA 1225		12.2							4.94							4.15
FA 1226		4.16							3.31							5.42
FA 1227		2.38							2.74							18.5
FA 1228		7.13							2.18							7.88
FA 1229		15.4							5.21							3.52
FA 1230		8.3							25.4							2.98
FA 1231		3.37							2.62							2.73
FA 1232		5.44							3.02							4.01
FA 1233		11.3							4.21							5.47
FA 1234		2.42							8.5							4.49
FA 1235		2.38							8.78							2.48
FA 1236		9.08							4.1							4.61
FA 1237		11							19.1							4.6
FA 1238		11.2							25.2							11.5
FA 1239		17.5							19.5							2.94
FA 1240		5.71							10.5							7.36
FA 1241		4.66							19							8.61
FA 1242		6.26							14.2							3.68
FA 1243		3.53							3.6							6.67
FA 1244		3.5							2.64							7.3
FA 1245		16.3							3.96							11.2
FA 1246		16.9							9.29							14.3
FA 1247		3.47							20.8							3.33
FA 1248		8.79							4.45							5.36
FA 1249		11.5							4.59							10.8
FA 1250		4.86							4.23							3.51
FA 1251		5.91							6.81							3.86
FA 1252		8.01							10.2							10.7
FA 1253		2.25							4.74							3.96
FA 1254		3.11							5.01							6.5
FA 1255		6.18							5.87							3.05
FA 1256		7.09							11.7							15.3
FA 1257		11.8							5.27							12.3
FA 1258		2.66							5.55							9.15
FA 1259		4.8							3.23							5.1
FA 1260		6.04							4.03							8.88
FA 1261		40.3							9.4							10.4
FA 1262		7.83							10.6							221
FA 1263		20.3							6.07							8.98
FA 1264		4.15							6.64							6.52
FA 1265		6.15							4.02							2.55
FA 1266		8.57							9.82							7.88
FA 1267		6.15							4.52							15.9
FA 1268		8.01							6.87							3.67
FA 1269		6.42							5.57							2.67
FA 1270		13.3							21.6
FA 1271		15.5							3.9
FA 1272		5.17							16.2
FA 1273		6.85							23.7
FA 1274		2.73							25.2
FA 1275		4.32							4.12
FA 1276		12.5							19.7
FA 1277		11.1							7.73
FA 1278		4.48							8.62
FA 1279		3.26							3.81
FA 1280		4.56							17.4
FA 1281		5.24							27.7
FA 1282		6.38							4.73
FA 1283		12.5							3.97
FA 1284		4.28							13.6
FA 1285		8.17							12.6
FA 1286		5.51							19.4
FA 1287		45.3							18.1
FA 1288		9.5							5.42
FA 1289		24.7							4.04
FA 1290		3.21							1.99
FA 1291		25.6							6.06
FA 1292		17.6							16.3
FA 1293		4.46							9.89
FA 1294		6.95							2.89
FA 1295		17.6							4.22
FA 1296		12.1							4.54
FA 1297		6.56							8.56
FA 1298		3.33							5.12
FA 1299		6.08							5.28
FA 1300		4.13							6.11
FA 1301		16							4.62
FA 1302		7.7							7.61
FA 1303		154							3.28
FA 1304		9.85							10.6
FA 1305		11.5							8.82
FA 1306		17.9							3.68
FA 1307		6.09							6.38
FA 1308		16.3							3.2
FA 1309		3.68							9.02
FA 1310		7.73							5.02
FA 1311		11.5							9.09
FA 1312		6.03							4.93
FA 1313		20.3							5.19
FA 1314		3.05							5.64
FA 1315		13.4							4.85
FA 1316		3.98							5.92
FA 1317		3.4							3.64
FA 1318		7.21							25.4
FA 1319		6.99							8.96
FA 1320		5.24							7.57
FA 1321		7.61							9.01
FA 1322		18.3							3.49
FA 1323		7.18							17.2
FA 1324		8.68							3.17
FA 1325		20.2							6.57
FA 1326		11.7							19.8
FA 1327		6.21							2.83
FA 1328		17.7							2.57
FA 1329		18.6							7.66
FA 1330		18.1							12.5
FA 1331		7.6							35.3
FA 1332		26.5							10.4
FA 1333		12.1							19.5
FA 1334		8.92							15.8
FA 1335		32.6							7.55
FA 1336		7.76							3.35
FA 1337		36.7							16.4
FA 1338		22.9							5.64
FA 1339		15.9							9.55
FA 1340		16.4							5.49
FA 1341		23.9							5.85
FA 1342		9.09							3.96
FA 1343		26.4							2.78
FA 1344		2.4							4.4
FA 1345		22.5							8.83
FA 1346		8.56							5.14
FA 1347		4.12							4.44
FA 1348		12.9							14.1
FA 1349		5.11							3.56
FA 1350		9.38							2.68
FA 1351		2.94							9.88
FA 1352		7.07							10.1
FA 1353		4.37							7.25
FA 1354		10.5							2.74
FA 1355		3.44							8.44
FA 1356		12.2							4.78
FA 1357		17							5.08
FA 1358		11.5							7.04
FA 1359		3.97							7.47
FA 1360		32.3							3.05
FA 1361		6.04							5.48
FA 1362		4.42							16.3
FA 1363		11.6							4.65
FA 1364		8.24							5.25
FA 1365		3.69							3.45
FA 1366		6.63							10.2
FA 1367		12.2							9.72
FA 1368		21.2							19
FA 1369		4.21							14.6
FA 1370		18.7							2.59
FA 1371		2.6							3.09
FA 1372		2.67							12.7
FA 1373		5.27							4.63
FA 1374		4.65							20
FA 1375		10.7							4.92
FA 1376		5.32							3.7
FA 1377		7.13							6.74
FA 1378		10.4							7.43
FA 1379		2.46							22.5
FA 1380		4.96							3.7
FA 1381		6.91							13
FA 1382		42.3							10.8
FA 1383		8.61							11.5
FA 1384		7.84							6.78
FA 1385		13.7							16.1
FA 1386		4.52							8.09
FA 1387		4.85							3.9
FA 1388		15.7							15.6
FA 1389		17.8							7.39
FA 1390		5.59							9.47
FA 1391		8.78							3.22
FA 1392		9.5							2.34
FA 1393		16.1							3.94
FA 1394		5.06							11.8
FA 1395		2.65							6.04
FA 1396		6.29							4.98
FA 1397		3.16							6.62
FA 1398		7.45							13.4
FA 1399		21.6							6.77
FA 1400		5.16							15
FA 1401		9.58							2.43
FA 1402		13							2.61
FA 1403		6.74							8.67
FA 1404		43.3							19.1
FA 1405		22.7							6
FA 1406		9.63							6.17
FA 1407		4.15							2.27
FA 1408		26.1							7.77
FA 1409		12.9							2.97
FA 1410		9.73							5.27
FA 1411		3.56							5.3
FA 1412		19.3							8.03
FA 1413		12.1							5.04
FA 1414		5.27							25.3
FA 1415		20							7.66
FA 1416		4.17							8.36
FA 1417		9.82							8.51
FA 1418		6.75							13.1
FA 1419		165							15.5
FA 1420		5.12							4.44
FA 1421		20.8							18.2
FA 1422		16							5.36
FA 1423		20.3							7.79
FA 1424		8.02							31
FA 1425		14.8							9.27
FA 1426		3.26							8.82
FA 1427		5.97							18.2
FA 1428		6.16							15.3
FA 1429		2.81							13.4
FA 1430		2.63							2.24
FA 1431		2.27							15.5
FA 1432		31.2							5.32
FA 1433		3.76							9.34
FA 1434		12.9							5.74
FA 1435		4.85							4.25
FA 1436		8.33							7.76
FA 1437		11.3							7.5
FA 1438		9.18
FA 1439		9.68
FA 1440		9.68
FA 1441		4.08
FA 1442		20.6
FA 1443		10.3
FA 1444		7.34
FA 1445		9.31
FA 1446		8.61
FA 1447		23.8
FA 1448		21.8
FA 1449		6.82
FA 1450		5.21
FA 1451		3.42
FA 1452		15.1
FA 1453		15.4
FA 1454		11.6
FA 1455		19.2
FA 1456		13.2
FA 1457		13.2
FA 1458		17.1
FA 1459		18.3
FA 1460		10.8
FA 1461		11
FA 1462		21.2
FA 1463		5.6
FA 1464		4.85
FA 1465		22.4
FA 1466		26.7
FA 1467		2.78
FA 1468		8.15
FA 1469		5.88
FA 1470		4.81
FA 1471		8.76
FA 1472		15
FA 1473		3.96
FA 1474		5.45
FA 1475		4.91
FA 1476		18.7
FA 1477		7.54
FA 1478		3.96
FA 1479		15.9
FA 1480		14.3
FA 1481		4.74
FA 1482		8.32
FA 1483		3.81
FA 1484		7.76
FA 1485		7.22
FA 1486		7.95
FA 1487		2.44
FA 1488		8.67
FA 1489		4.9
FA 1490		3.44
FA 1491		5.43
FA 1492		3.45
FA 1493		6.48
FA 1494		15.6
FA 1495		3.91
FA 1496		6.61
FA 1497		7.03
FA 1498		65.9
FA 1499		4.39
FA 1500		5.77
FA 1501		5.75
FA 1502		3.42
FA 1503		5.44
FA 1504		13.2
FA 1505		16.1
FA 1506		7.56
FA 1507		5.6
FA 1508		7.73
FA 1509		20.5
FA 1510		3.32
FA 1511		11.3
FA 1512		5.46
FA 1513		2.34
FA 1514		8.45
FA 1515		5.6
FA 1516		4.19
FA 1517		6.1
FA 1518		6.51
FA 1519		6.18
FA 1520		15.1
FA 1521		7.39
FA 1522		11.7
FA 1523		34.4
FA 1524		3.77
FA 1525		40.7
FA 1526		2.49
FA 1527		20.7
FA 1528		4.48
FA 1529		4.18
FA 1530		7.24
FA 1531		2.44
FA 1532		6.01
FA 1533		6.97
FA 1534		5.74
FA 1535		6.22
FA 1536		2.49
FA 1537		9.23
FA 1538		4.55
FA 1539		4.13
FA 1540		2.66
FA 1541		17.5
FA 1542		2.83
FA 1543		141
FA 1544		19.1
FA 1545		4.92
FA 1546		21.4
FA 1547		3.63
FA 1548		27.4
FA 1549		31.5
FA 1550		9.65
FA 1551		6.05
FA 1552		10.6
FA 1553		2.87
FA 1554		6.2
FA 1555		17.3
FA 1556		3.33
FA 1557		6.43
FA 1558		7.73
FA 1559		8.85
FA 1560		3.66
FA 1561		7.39
FA 1562		8.1
FA 1563		9.5
FA 1564		7.3
FA 1565		8.65
FA 1566		16.9
FA 1567		11.5
FA 1568		25.6
FA 1569		15
FA 1570		16.2
FA 1571		6.07
FA 1572		19.7
FA 1573		5.05
FA 1574		2.85
FA 1575		6.01
FA 1576		3.76
FA 1577		4.43
FA 1578		33.8
FA 1579		16.5
FA 1580		9.97
FA 1581		18
FA 1582		12.9
FA 1583		4.78
FA 1584		5
FA 1585		22.6
FA 1586		17
FA 1587		20.4
FA 1588		16.5
FA 1589		2.94
FA 1590		5.61
FA 1591		8.39
FA 1592		4.7
FA 1593		6.15
FA 1594		11.9
FA 1595		4.67
FA 1596		5.44
FA 1597		4.32
FA 1598		3.79
FA 1599		7.84
FA 1600		2.98
FA 1601		6.29
FA 1602		9.88
FA 1603		10.1
FA 1604		2.23
FA 1605		15.1
FA 1606		5.71
FA 1607		8.95
FA 1608		3.01
FA 1609		4.06
FA 1610		12.4
FA 1611		3.25
FA 1612		7.97
FA 1613		3.49
FA 1614		7.11
FA 1615		7.2
FA 1616		14.8
FA 1617		3.53
FA 1618		4.25
FA 1619		70.8
FA 1620		8.07
FA 1621		5.71
FA 1622		7.07
FA 1623		2.91
FA 1624		3.96
FA 1625		14.6
FA 1626		3.06
FA 1627		2.92
FA 1628		6.62
FA 1629		3.33
FA 1630		15.7
FA 1631		6.74
FA 1632		18.1
FA 1633		11.5
FA 1634		11.5
FA 1635		14.4
FA 1636		14.4
FA 1637		2.49
FA 1638		8.55
FA 1639		4.09
FA 1640		3.69
FA 1641		5.05
FA 1642		4.68
FA 1643		11.9
FA 1644		3.16
FA 1645		24.2
FA 1646		12
FA 1647		3.79
FA 1648		3
FA 1649		15.8
FA 1650		51.1
FA 1651		3.33
FA 1652		10.3
FA 1653		8.51
FA 1654		6.32
FA 1655		7.87
FA 1656		4.07
FA 1657		6.21
FA 1658		6.46
FA 1659		11.3
FA 1660		3.24
FA 1661		5.75
FA 1662		10.3
FA 1663		7.51
FA 1664		6.62
FA 1665		5.05
FA 1666		11.5
FA 1667		145
FA 1668		3.27
FA 1669		8.16
FA 1670		34.4
FA 1671		10.8
FA 1672		9.41
FA 1673		33.5
FA 1674		4.81
FA 1675		3.47
FA 1676		12
FA 1677		5.94
FA 1678		5.73
FA 1679		2.87
FA 1680		7.11
FA 1681		6.64
FA 1682		10.3
FA 1683		3.03
FA 1684		8.64
FA 1685		3.06
FA 1686		9.62
FA 1687		9.2
FA 1688		9.46
FA 1689		5.24
FA 1690		5.53
FA 1691		7.45
FA 1692		8.16
FA 1693		14.6
FA 1694		7.36
FA 1695		7.03
FA 1696		9.45
FA 1697		27.7
FA 1698		6.36
FA 1699		3.51
FA 1700		7.25
FA 1701		6.01
FA 1702		6.36
FA 1703		18.9
FA 1704		4.95
FA 1705		6.56
FA 1706		4.75
FA 1707		10.4
FA 1708		9.61
FA 1709		14.4
FA 1710		5.01
FA 1711		3.8
FA 1712		24.7
FA 1713		13.7
FA 1714		7.65
FA 1715		9.05
FA 1716		16.2
FA 1717		18.3
FA 1718		18.8
FA 1719		9
FA 1720		9.17
FA 1721		21.6
FA 1722		17
FA 1723		2.93
FA 1724		7.15
FA 1725		9.26
FA 1726		8.02
FA 1727		6.88
FA 1728		15.1
FA 1729		2.2
FA 1730		4.94
FA 1731		5.2
FA 1732		6.06
FA 1733		10.8
FA 1734		5.37
FA 1735		4.82
FA 1736		6.6
FA 1737		10.4
FA 1738		4.14
FA 1739		2.91
FA 1740		7.75
FA 1741		3.01
FA 1742		13
FA 1743		2.82
FA 1744		5.23
FA 1745		57.8
FA 1746		8
FA 1747		5.21
FA 1748		10.1
FA 1749		8.08
FA 1750		4.1
FA 1751		2.62
FA 1752		6.15
FA 1753		18.3
FA 1754		5.94
FA 1755		3.14
FA 1756		16
FA 1757		5.85
FA 1758		8.34
FA 1759		11.7
FA 1760		15.6
FA 1761		2.89
FA 1762		10.9
FA 1763		3.07
FA 1764		6.43
FA 1765		13.5
FA 1766		5.15
FA 1767		3.14
FA 1768		4.23
FA 1769		6.72
FA 1770		5.3
FA 1771		10.3
FA 1772		4.85
FA 1773		5.23
FA 1774		29.4
FA 1775		11.8
FA 1776		5.77
FA 1777		15.2
FA 1778		46.2
FA 1779		2.57
FA 1780		4.95
FA 1781		6.46
FA 1782		5.19
FA 1783		12.1
FA 1784		7.94
FA 1785		6.37
FA 1786		9.85
FA 1787		4.49
FA 1788		18.4
FA 1789		4.64
FA 1790		13.5
FA 1791		4.87
FA 1792		2.69
FA 1793		17.9
FA 1794		2.68
FA 1795		187
FA 1796		11
FA 1797		27.2
FA 1798		11.6
FA 1799		4.98
FA 1800		2.61
FA 1801		20.2
FA 1802		4.71
FA 1803		3.69
FA 1804		10.8
FA 1805		12.5
FA 1806		8.98
FA 1807		6.15
FA 1808		7.01
FA 1809		7.51
FA 1810		5.71
FA 1811		6.17
FA 1812		3.7
FA 1813		2.68
FA 1814		4.14
FA 1815		5.14
FA 1816		6.92
FA 1817		7.71
FA 1818		8.14
FA 1819		7.98
FA 1820		36.1
FA 1821		11.1
FA 1822		13.8
FA 1823		2.47
FA 1824		5.52
FA 1825		17.6
FA 1826		9.47
FA 1827		2.64
FA 1828		3.15
FA 1829		8.08
FA 1830		9.1
FA 1831		3.88
FA 1832		6.8
FA 1833		4.19
FA 1834		7.27
FA 1835		13.3
FA 1836		4.93
FA 1837		19.3
FA 1838		12.6
FA 1839		9.25
FA 1840		7.11
FA 1841		9.29
FA 1842		15.5
FA 1843		16
FA 1844		9.54
FA 1845		2.71
FA 1846		18.8
FA 1847		17.1
FA 1848		7.65
FA 1849		5.32
FA 1850		15.9
FA 1851		39.7
FA 1852		6.7
FA 1853		9.15
FA 1854		11.8
FA 1855		7.15
FA 1856		2.77
FA 1857		7.02
FA 1858		6.38
FA 1859		8.92
FA 1860		2.45
FA 1861		6.06
FA 1862		6.63
FA 1863		4.27
FA 1864		7.49
FA 1865		11.4
FA 1866		10.4
FA 1867		53.7
FA 1868		11.9
FA 1869		11.7
FA 1870		12.9
FA 1871		9.33
FA 1872		2.6
FA 1873		7
FA 1874		5.7
FA 1875		3.35
FA 1876		3.95
FA 1877		11.7
FA 1878		18.4
FA 1879		3.89
FA 1880		11
FA 1881		3.42
FA 1882		4.51
FA 1883		5.38
FA 1884		18.6
FA 1885		9.46
FA 1886		11.5
FA 1887		4.73
FA 1888		7.56
FA 1889		12.5
FA 1890		4.8
FA 1891		6.07
FA 1892		11.8
FA 1893		12.1
FA 1894		21.1
FA 1895		4.93
FA 1896		54.6
FA 1897		22.1
FA 1898		3.12
FA 1899		3.98
FA 1900		5.8
FA 1901		6.33
FA 1902		12.6
FA 1903		6.8
FA 1904		14.6
FA 1905		3.7
FA 1906		15.2
FA 1907		3.08
FA 1908		3.62
FA 1909		6.2
FA 1910		2.85
FA 1911		10.4
FA 1912		22.2
FA 1913		14.7
FA 1914		133
FA 1915		6.77
FA 1916		16.9
FA 1917		6.82
FA 1918		48.9
FA 1919		10.6
FA 1920		5.55
FA 1921		4.58
FA 1922		5.28
FA 1923		6.89
FA 1924		29.2
FA 1925		4.37
FA 1926		3.72
FA 1927		12
FA 1928		5.81
FA 1929		6.22
FA 1930		5.79
FA 1931		11.8
FA 1932		9.58
FA 1933		31.6
FA 1934		3.47
FA 1935		23.8
FA 1936		11.3
FA 1937		7.49
FA 1938		18
FA 1939		10.6
FA 1940		6.32
FA 1941		4.41
FA 1942		4.31
FA 1943		6.68
FA 1944		6.37
FA 1945		9.3
FA 1946		7.84
FA 1947		2.81
FA 1948		7.31
FA 1949		5.48
FA 1950		15
FA 1951		17
FA 1952		9.41
FA 1953		10.1
FA 1954		7.41
FA 1955		17.5
FA 1956		8.41
FA 1957		21.4
FA 1958		5.44
FA 1959		35.3
FA 1960		13.1
FA 1961		37.7
FA 1962		10.6
FA 1963		3.92
FA 1964		2.38
FA 1965		3.65
FA 1966		8
FA 1967		3.98
FA 1968		4.5
FA 1969		16.5
FA 1970		8.13
FA 1971		4.83
FA 1972		2.49
FA 1973		5.22
FA 1974		18.3
FA 1975		31.5
FA 1976		4.6
FA 1977		9.99
FA 1978		4.45
FA 1979		36.4
FA 1980		2.77
FA 1981		9.96
FA 1982		7.36
FA 1983		4.55
FA 1984		2.34
FA 1985		11.4
FA 1986		4.55
FA 1987		9.49
FA 1988		5.82
FA 1989		3.02
FA 1990		10.5
FA 1991		9.82
FA 1992		7.4
FA 1993		5.57
FA 1994		3.69
FA 1995		4.75
FA 1996		4.51
FA 1997		3.28
FA 1998		11
[truncated: 937 more rows]

## Sheet: Focal adhesion life time (min)
	35 nm					50 nm									70 nm
	Cell1	Cell2	Cell3	Cell4	Cell5	Cell1	Cell2	Cell3	Cell4	Cell5	Cell6	Cell7	Cell8	Cell9	Cell1	Cell2	Cell3	Cell4	Cell5	Cell6	Cell7	Cell8	Cell9	Cell10	Cell11	Cell12	Cell13
FA 1	24	6	20	26	8	14	12	12	36	8	6	12	24	14	8	8	16	8	14	54	8	32	60	14	24	42	14
FA 2	42	8	20	44	26	18	12	28	32	26	14	60	22	16	8	20	18	8	26	32	10	40	42	56	12	32	40
FA 3	38	16	38	10	34	18	8	28	10	6	10	38	12	38	16	10	52	8	12	18	16	8	20	54	78	16	18
FA 4	48	16	38	26	10	8	10	8	56	20	12	20	36	14	18	18	8	6	34	16	32	4	8	8	16	30	10
FA 5	26	18	8	16	22	16	8	4	52	16	8	56	44	8	8	6	6	14	6	8	52	32	8	24	8	48	18
FA 6	30	10	8	10	10	8	4	24	58	8	14	52	34	8	10	20	28	12	12	34	12	22	20	6	6	16	10
FA 7	36	12	40	26	12	10	8	10	36	14	24	10	8	6	18	14	8	24	14	22	28	16	10	38	14	24	62
FA 8	36	8	40	22	10	20	8	22	12	38	10	8	18	46	10	18	22	12	6	6	10	14	12	40	52	30	6
FA 9	26	10	10	18	6	16	8	8	12	16	12	20	18	8	16	8	12	12	16	22	14	8	14	8	12	46	12
FA 10	28	12	10	12	4	14	12	10	6	8	8	22	8	12	22	20	8	16	12	14	8	14	50	8	34	46	82
FA 11	24	8	16	16	12	16	12	24	48	14	6	14	18	14	18	14	18	10	78	12	80	4	6	34	34	66	26
FA 12	30	58	16	8	6	18	12	8	34	8	8	6	50	8	8	10	26	26	12	22	22	8	10	14	8	58	32
FA 13	34	14	12	24	12	16	12	10	22	6	26	28	22	14	18	8	30	20	14	32	10	6	22	6	52	18	34
FA 14	28	8	12	32	14	12	8	16	42	34	12	18	10	8	26	12	26	16	6	34	8	18	24	24	46	12	74
FA 15	28	6	14	14	16	20	10	24	32	12	18	50	20	30	10	12	6	8	14	8	10	6	48	8	4	32	30
FA 16	24	16	14	12	6	18	8	28	24	24	14	20	64	34	22	28	14	8	22	8	10	36	42	10	16	22	8
FA 17	34	18	26	20	14	10	8	20	34	10	18	8	24	16	20	10	40	12	24	6	8	12	20	12	30	8	16
FA 18	28	8	26	14	8	14	6	6	32	28	16	8	26	28	22	10	10	22	56	10	12	32	68	6	4	24	8
FA 19		6	24	22	10	18	8	10	14	12	12	48	34	16	18	16	10	12	6	10	8	24	22	8	16	26	80
FA 20		14	24	40	26	14	10	8	26	30	20	36	32	8	18	14	8	26	16	24	10	38	18	8	20	26	10
FA 21		10	20	18	10	8	10	8	10	26	22	16	20	12	6	6	14	14	18	8	10	14	16	20	22	68	28
FA 22		8	20	14	12	8	8	14	10	28	22	8	12	8	14	10	14	12	14	14	14	12	8	24	16	58	8
FA 23		10	28	10	20	16	10	12	18	6	30	56	8	48	20	6	12	8	8	30	22	32	14	6	14	24	20
FA 24		10	28	16	16	10	8	28	24	6	8	10	68	8	14	20	10		6	8	12	10	16	14	10	64	50
FA 25		18	6	34	16	16	12	26	10	28	8	14	8	22	12	12	10		32	8	54	8	8	10	8	8	6
FA 26		16	6	44	6	12	4	14	24	6	8	8	16	14	8	14	14		20	10	8	8	56	10	8	46	8
FA 27		10	18	30	14	10	8	12	18	16	10	18	58	16	16	4	22		6	6	8	28	8	14	32	12	10
FA 28		14	18	22	12	8	10	16	12	40	24	12	4	20	16	10	8		32	18	14	26	28	10	14	44	4
FA 29		18	38	12	30	8	6	8	26	8	12	24	10	8	14	8	16		50	8	24	6	32	16	14	40	26
FA 30		18	38	28	28	8	12	8	10	20	10	50	58	16	16	6	20		46	36	6	6	32	14	28	12	20
FA 31		12	20	16	28		12	8	16	8	10	50	10	10	12	16	12		14	14	38	22	14	24	24	8	20
FA 32		14	20	10	34		8	30	38	30	10	8	44	26	10	24	8		8	6	14	8	10	8	8	6	8
FA 33		12	18	20	10		12	28	20	22	18	6	30	36	24	6	16		26	6	14	30	34	24	12	30	34
FA 34		18	18	38	14		10	24	18	36	18	8	38	8	18	6	10		26	36	50	12	28	14	4	6	14
FA 35		18	18	16	32		10	20	8	18	16	34	10	12	14	16	8		6	24	14	14	8	34	8	14	24
FA 36		68	18	26	20		12	10	16	6	12	10	10	10	8	6			18	18	8	44	24	44	30	22	16
FA 37		42	20	14	32		10	34	30	16	12	12	18	12	20	12			8	26	10	38	20	8	10	16	14
FA 38		12	20	12	28		12	14	8	22	10	24	14	12	20	12			26	12	14	12	8	12	38	16	68
FA 39		34	24	14	8		12	14	42	20	8	4	24	12	20	20			16	22	12	18	10	8	12	8	28
FA 40		34	24	8	8		8	24	18	12	6	8	20	10	18	36			12	20	16	14	14	22	8		4
FA 41		12	38	30	6		12	16	44	16	8	8	20	8	16	16			4	14	32	18	10	24	10		40
FA 42		8	38	14	6		10	8	32	28		6	26	8	16	8			18	10	12	10		32	18		22
FA 43		16	8	26	10		10	36	12	8		20	18		8	18			14	6	8	30		6	26		14
FA 44		12	8	12	14		12	36	8	30		8	18		8	6			14	12	14	8		36	30		20
FA 45		20	10	46	8		12	22	8	44		32	26		18	8			6	16	8	42		10	12		22
FA 46		14	10	14	18		8	32	12	30		4	26		10	16			18	10	50	8		24	34		12
FA 47		26	18	10	28		8	28	8	10		10	14		18	28			14	34	44	26		28	68		22
FA 48		26	18	10	30		8	22	14	8		14	8		12	10			8	6	12	20		16	70		18
FA 49		14	22	12	12		8	22	18	8		10	8		12	10			8	20	6	16		6	26		38
FA 50		14	22	16	12		10	26	12	8		10	18		16	18			6	8	10	8		10	8		36
FA 51		16	26	26	34		10	18	10	8		26	14		12	18			10	40	18	14		8	8		38
FA 52		8	26	16	10		10	26	6	38		8	8		10	24				10	24	8		14	62		4
FA 53		14	22	16	16		10	12	14	12		10			6	20				30	32	12		10	16		8
FA 54		6	22	10	12		10	14	18	8		12			16	24				10	32	28		16	14		10
FA 55		24	8	12	10		6	32	26	36		16			16	30				8	10	8		24	24		12
FA 56		32	8	14	16		8	16	32	8		12			18	32				18	30	6		24	6		20
FA 57		14	12	10	28		12	14	34	42		12			16	8				8	6	20		14	10		18
FA 58		52	12	12	22		6	8	10	12		6			14	32				16	6	20		8	20		14
FA 59		16	20	10	8		12	16	12	16		6			18	6				12	10	10		12	12		42
FA 60		8	20	10	8		10	6	16	22		18			18	14				28	22	10		12	14		62
FA 61		34	30	6	6		4	28	14	26		22			14	22				20	30	8		4	10		16
FA 62		8	30	30	22		6	22	20	8		20			8	12				14	28	18		28	34		52
FA 63		24	28	8	18		8	28	18	12		8			10	16				24	6	22		20	12		20
FA 64		30	28	18	14		8	8	14	8		18			10	16				10	14	20		26	10		62
FA 65		30	12	58	18		10	12	4	6		8			6	8				18	16	26		12	12		8
FA 66		8	12	8	22		6	16	10	8		8			10	8				10	20	14		10	8		40
FA 67		30	6	8	18		10	30	16	12		8			12	38				8	16	10		8	50		44
FA 68		20	6	28	14		10	10	8	32		10			8	26				16	14	20		12	14		12
FA 69		8	8	10	10		6	20	30	20		12			12	32				8	16	20		12	30		8
FA 70		28	8	8	8		6	22	20	8		10			4	32				16	10	18		18	42		10
FA 71		12	18	14	8		8	10	6	30		6			12	10				24	8	14		16	28		18
FA 72		62	18	12	6		8	24	20	20		10			12	10				20	6	14		24	10		8
FA 73		16	10	64	12		10	12	10	8					8	6				14	8	10		6	8		6
FA 74		16	10	10	10		8	8	6	8					8	28				14		12		6	14		12
FA 75		40	6	16	8		8	10	8	22					8	6				22		10		12	54		8
FA 76		36	6	12	10		8	12	10	12					8	18				10		8		12	18		10
FA 77		18	8	16	20		6	28	16	8					8	18				12				12	44		26
FA 78		36	8	6	28		10	20	4	18					4	30				16				12	8		26
FA 79		12	14	14	8		8	20	22	14					8	26				10				14	14		14
FA 80		16	14	14	12		10	16	26	10					6	10				16				6	8		12
FA 81		14	12	28	8		6	26	36	8					8	26				14				6	26		18
FA 82		32	12	12	8		10	18	8	8						8				14				6	24		44
FA 83		72	14	20	8		6	10	18	6						28				8				8	34		4
FA 84		22	14	42	22		10	24	10	14						26				8				4	4		14
FA 85		6	8	10	10		8	22	8	16						6				10				6	8		10
FA 86			8	34	6		6	8	8	4						24				8				10	8		38
FA 87			22	28	8		8	14	10	12						32				8				8	4		4
FA 88			22	22	10		8	12	22	8						16								10	10		32
FA 89			14	12	16		4	16	10	8						28								6	8		36
FA 90			14	26	16		6	10	6	8						26								4	10		10
FA 91			10	8	22		8	10	16							4								8	30		14
FA 92			10	10	12		8	18	18							28									28		8
FA 93			10	18	26		6	16	8							8									28		28
FA 94			10	44	24		8	16	16							24									24		8
FA 95			10	18	24			18	14							28									28		30
FA 96			10	12	10			20	8							30									10		40
FA 97			10	12	10			14	14							10									44		8
FA 98			10	26	12			16	8							12									8		38
FA 99			12	14	6			16	18							12									42		10
FA 100			12	12	8			14	16							6									28		10
FA 101			6	22	24			12	20							24									8		6
FA 102			6	30	22			18	12							22									8		22
FA 103			6	14	8			16	30							8									20		12
FA 104			6	20	8			12	10							8									40		10
FA 105			8	34	14			14	38							20									4		24
FA 106			8	18	14			18	38							14									12		22
FA 107			4	18	18			16	22							6									14		6
FA 108			4	16	16			16	4							12									36		6
FA 109				36	12			8	8							26									34		26
FA 110				14	20			10	8							24									4		26
FA 111				20	20			12	10							18									16		12
FA 112				38	8			12	12							24									6		26
FA 113				20	16			10	10							6									30		24
FA 114				22	8			6	6							10									22		6
FA 115				16	8			12	12							12									8		18
FA 116				22	8			6	16							8									28		12
FA 117				10	10			8	24							18									28		10
FA 118				14	10			8	8							8									22		14
FA 119				14	10			10	18							24									18		4
FA 120				28	8			12	14							10									20		16
FA 121				8	6			12	10							8									10		8
FA 122				12	8			6	22							16									20		12
FA 123				12	8			10	12							22									26		12
FA 124				10	8			8	8							20									6		6
FA 125				10				6	32							8									18		8
FA 126				10				8	18							14									18		10
FA 127				24				8	6							14									18		8
FA 128				10					6							18									14		10
FA 129				24					32							12									12
FA 130				28					8							10									8
FA 131				14					10							12									8
FA 132				16					4							18									18
FA 133				28					10							16									16
FA 134				8					28							16									18
FA 135				20					30							18									18
FA 136				26					8							8									12
FA 137				18					12							8									12
FA 138				6					20							6									8
FA 139				24					4							14									10
FA 140				12					28							20									10
FA 141				12					12							18									12
FA 142				16					12							8									10
FA 143				14					20							14									8
FA 144				10					10							14
FA 145				6					22							14
FA 146				12					10							12
FA 147				12					14							8
FA 148				14					20							8
FA 149				8					12							8
FA 150				10					18							12
FA 151				10					26							16
FA 152				6					8							12
FA 153				6					10							14
FA 154				8					10							10
FA 155				10					12							12
FA 156				8					6							10
FA 157				6					16							6
FA 158				4					6							14
FA 159									12							10
FA 160									20							12
FA 161									10							8
FA 162									12							12
FA 163									20							8
FA 164									20							8
FA 165									14							8
FA 166									14							8
FA 167									4							10
FA 168									18							10
FA 169									12							6
FA 170									16							8
FA 171									16							6
FA 172									8							8
FA 173									14
FA 174									16
FA 175									14
FA 176									8
FA 177									12
FA 178									8
FA 179									10
FA 180									6
FA 181									8
FA 182									8
FA 183									12
FA 184									8
FA 185									10
FA 186									6
FA 187									10
FA 188									8
FA 189									8
FA 190									8
FA 191									8
FA 192									8

## Sheet: Focal Adhesion Density
	35 nm						50 nm								70 nm
video frame	Cell1	Cell2	Cell3	Cell4	Cell5		Cell1	Cell2	Cell3	Cell4	Cell5	Cell6	Cell7		Cell1	Cell2	Cell3	Cell4	Cell5	Cell6	Cell7	Cell8	Cell9	Cell10
1	0.0120389	0.0445292	0.0893208	0.093838	0.0139672		0.0211454	0.0418114	0.0354407	0.0455463	0.0522993	0.0254051	0.0837702		0.0139532	0.0356838	0.0570941	0.0154008	0.0170041	0.0194781	0.0263735	0.0256754	0.0230549	0.0351144
2	0.0112363	0.0893863	0.103872	0.115641	0.0144843		0.0196402	0.0453378	0.0441741	0.0454115	0.0501657	0.0403493	0.0905584		0.0193198	0.037468	0.0212511	0.0138607	0.0218555	0.0285142	0.0285888	0.0359952	0.0249762	0.0324132
3	0.0123653	0.0850749	0.100553	0.135245	0.0176753		0.0218596	0.0453378	0.0341375	0.0483904	0.0605398	0.0542188	0.0931747		0.0171988	0.037468	0.022688	0.0226768	0.0214046	0.0252783	0.0327589	0.0322369	0.0268974	0.0324132
4	0.0141505	0.085797	0.120289	0.146326	0.0176753		0.0265736	0.0524561	0.0359676	0.0603781	0.0699286	0.0639583	0.0779285		0.0158048	0.0428206	0.0276844	0.0219019	0.034755	0.0317048	0.0354251	0.0382813	0.0326612	0.0351144
5	0.0124784	0.104795	0.116039	0.144224	0.0189379		0.022907	0.0474603	0.0469034	0.0467076	0.0709276	0.0605921	0.0740024		0.0184544	0.038578	0.024911	0.0206883	0.0285352	0.0307867	0.0295366	0.0322369	0.0363802	0.0321234
6	0.0116985	0.100543	0.12617	0.163594	0.0214629		0.0219147	0.0524561	0.0333086	0.0590842	0.0664021	0.101395	0.0644134		0.0175317	0.038578	0.0276789	0.023636	0.0316579	0.0355562	0.0369903	0.0322369	0.0341064	0.029203
7	0.0140382	0.118122	0.105141	0.142506	0.0202004		0.0268485	0.0488284	0.0270727	0.0574413	0.0636285	0.0693307			0.0204047	0.038578	0.0359978	0.0198304	0.0326948	0.0407356	0.0303847	0.034413	0.0299908	0.0233624
8	0.0116985	0.104141	0.0944642	0.146164	0.0177948		0.0219326	0.0463869	0.0249516	0.0486359	0.0567643	0.0865638			0.0209279	0.0369007	0.0388722	0.016036	0.0301187	0.0378259	0.0262069	0.0364373	0.0253768	0.0140898
9	0.0121377	0.0953189	0.10595	0.125809	0.0204518		0.0224314	0.0509589	0.0198067	0.0449882	0.0636791	0.0933531			0.0209279	0.0352234	0.0256225	0.0189676	0.0366988	0.0372561	0.0284854	0.0323887	0.0180366	0.0159837
10	0.0153744	0.0789326	0.102117	0.117287	0.0193156		0.0293492	0.043679	0.0212441	0.0332344	0.0558327	0.0925907			0.0179006	0.0375402	0.0316011	0.0230654	0.0313387	0.0346555	0.0335025	0.0414561	0.0257666	0.0166146
11	0.0113285	0.0661498	0.10368	0.124497	0.0204518		0.0213234	0.050185	0.0165125	0.0331587	0.0629342	0.0931215			0.0206128	0.0321773	0.0333092	0.0213962	0.0352291	0.0364637	0.032239	0.044531	0.0180366	0.0138455
12	0.0107963	0.0608527	0.0922088	0.128092	0.0157602		0.0200477	0.0473969	0.0171591	0.0273706	0.0581626	0.114986			0.0209851	0.0357525	0.0239854	0.0230221	0.0346705	0.0336588	0.0272846	0.0298899	0.0257666	0.0166146
13	0.0132877	0.0781012	0.103196	0.136954	0.0139597		0.0247134	0.0446089	0.0138305	0.0334257	0.0532621	0.118696			0.020447	0.0339649	0.0239854	0.0243791	0.0422442	0.0370145	0.0262313	0.0358679	0.02319	0.0156142
14	0.0116268	0.0781885	0.0695731	0.133308	0.0128908		0.0220035	0.0359455	0.0138745	0.0337371	0.0568731	0.116841			0.0192792	0.028602	0.0289732	0.0279883	0.0410489	0.0320792	0.0280439	0.0338753	0.0276526	0.00808074
15	0.0101777	0.0821155	0.0599442	0.122699	0.0133224		0.0188602	0.0388665	0.0177949	0.0315524	0.0532621	0.120007			0.0198147	0.028602	0.027875	0.0322245	0.0430074	0.0385003	0.0324515	0.0347567	0.0226248	0.00760171
16	0.0101777	0.0713108	0.0590115	0.14735	0.0115461		0.0197453	0.0358267		0.0303838	0.0571759	0.129844			0.0219569	0.028602	0.0260573	0.0268286	0.0382112	0.0321587	0.0245809	0.0347567	0.0276526	0.00760171
17	0.0069097	0.0669889	0.0672563	0.124233	0.0112641		0.0152663	0.0409448		0.0290281	0.0543382	0.112138			0.0203503	0.0303896	0.0304002	0.0315942	0.0436699	0.0482381	0.0261172	0.0347567	0.0150832	0.0101356
18		0.0514742	0.0635109	0.12516	0.00985647		0.013358	0.0332677		0.0255479	0.0538895	0.0963992			0.0179758	0.0250268	0.0265535	0.0349418	0.0409405	0.0529921	0.027039	0.0363883	0.0175971	0.0120512
19		0.0686322	0.0511551	0.121515	0.00590315		0.011129	0.0336572		0.025159	0.0464865	0.0859499			0.0190652	0.0250268	0.0241532	0.0308651	0.0327524	0.050203	0.0285658	0.0329228	0.0301664	0.0136132
20		0.0584822	0.0652504	0.12273	0.00506477		0.0178063	0.0352018		0.0240266	0.0416441	0.0995071			0.01961	0.0268144	0.0286024	0.0294592	0.0258815	0.054281	0.0184838	0.0370745	0.0276526	0.0136132
21		0.0589922	0.0407444	0.146959	0.00172566		0.0155806	0.0338735		0.0223767	0.0527703	0.0960591			0.0163416	0.0196639	0.02606	0.0319289	0.0284697	0.0504174	0.0220668	0.040977	0.0276526	0.0132254
22		0.0564229		0.111289	0.00081808		0.0155806	0.0323944		0.0192471	0.0455774				0.0236816	0.0299764	0.022882	0.0322168	0.0351067	0.0682218	0.0275835	0.0331438	0.0377081	0.0132254
23		0.0746774		0.127797	0.000802363		0.00946751	0.030708		0.0155675	0.0467099				0.0203925	0.0264498	0.0235176	0.0341149	0.030009	0.0631683	0.0312613	0.0293392	0.0301664	0.00793523
24		0.0648653		0.118263	0.000837398		0.0147779	0.0354323		0.00903014	0.0528299				0.0197346	0.0176332	0.0215124	0.030859	0.0309578	0.059606	0.0312613	0.0244493	0.0226248	0.00529015
25		0.0701979		0.129632			0.0126943	0.0295175		0.00888049	0.046019				0.0210503	0.0282131	0.0247718	0.0416596	0.0263996	0.0564734	0.0266438	0.0320798	0.0226248	0.00529015

## Sheet: Focal Adhesion length (um) 
	35 nm	50 nm	70 nm
	2.00043	2.00086	3.6823
	2.00032	2.00074	2.00066
	2.00071	2.00051	2.00164
	2.00119	2.00003	2.00068
	2.13425	4.13913	2.00042
	5.08667	2.00065	2.00045
	2.00111	2.78755	2.00086
	2.00094	2.00049	2.00065
	2.00393	2.2905	3.80379
	2.00053	2.0012	2.00083
	2.00094	2.00069	2.0002
	2.00043	2.00084	2.00063
	2.00007	2.00069	2.00128
	2.00048	2.00083	5.27388
	2.00025	2.00049	2.00026
	2.00021	2.00071	2.0008
	2.00018	3.352	2.0003
	8.36088	2.00122	2.00103
	3.51691	3.78066	2.00044
	2.00094	2.00064	2.00092
	2.33349	2.00045	6.60629
	2.0011	2.0006	2.00868
	2.00065	2.00042	2.00039
	2.00055	2.00074	2.00081
	2.00058	2.00029	2.00036
	2.00196	2.00025	2.00065
	2.00403	2.00066	2.00066
	4.3829	2.00098	2.0009
	2.00022	2.00027	2.00042
	2.00113	2.0007	2.00102
	2.0088	2.00064	2.34162
	4.97861	2.00018	2.0002
	2.00179	2.06843	2.0005
	2.00083	2.00118	2.0001
	3.4434	2.0006	2.00113
	2.0007	2.00041	2.00197
	2.37788	2.00039	2.00033
	2.85123	2.00057	2.0048
	2.00616	2.00027	2.00037
	2.00031	2.00012	2.00027
	2.00021	2.00053	2.00057
	2.00082	2.00056	2.00056
	2.00036	2.00066	2.00059
	2.00321	2.00084	2.00041
	2.00036	2.00052	2.57147
	2.00034	2.00044	2.00016
	2.00054	4.62258	2.0004
	2.00096	2.00093	2.00091
	2.00059	2.00048	2.00016
	2.00022	2.00118	2.53
	2.00025	2.00055	3.96517
	2.00051	2.00076	2.00108
	2.00015	2.00083	2.26971
	2.00109	2.00029	2.00068
	2.00024	2.00195	2.00041
	2.00076	2.00034	2.13118
	2.00021	2.00043	2.00093
	2.00016	2.00047	2.00039
	2.00042	2.63949	2.00213
	2.00033	2.93197	2.00233
	2.00074	2.00058	2.0006
	4.3295	2.00073	2.00036
	2.00188	2.00036	2.00044
	2.00056	2.00074	2.00019
	3.73127	2.00023	2.01094
	2.0003	2.0002	2.001
	2.00108	2.0009	2.00063
	2.00046	2.00048	2.00026
	2.00034	2.00092	2.00097
	2.00021	2.00036	2.00097
	2.81016	2.10423	2.00058
	2.00073	2.00068	2.0002
	2.00029	2.00078	2.00037
	2.00012	2.00081	2.0002
	2.00037	2.00038	2.00068
	2.00031	2.00016	2.00025
	2.0002	2.00094	3.53951
	2.00063	2.00071	2.00005
	2.00033	3.06399	2.00062
	4.42525	2.00055	2.00269
	2.00017	2.00064	2.00041
	2.0005	2.82565	2.00032
	2.00227	2.0003	2.00025
	2.00032	2.13826	2.30482
	2.00037	2.00006	2.00034
	2.71264	2.00048	2.0005
	2.00033	2.0004	2.0013
	2.0004	2.00507	2.60473
	2.0006	2.00011	2.00091
	2.00034	2.00059	2.00089
	2.00056	2.00013	2.42076
	2.001	2.00019	2.66647
	2.00452	2.00078	2.00037
	2.00031	2.00045	2.00068
	2.00075	2.00015	3.32815
	2.00141	2.00054	2.00018
	2.39986	2.17053	2.0004
	2.00015	2.00367	2.00113
	2.00057	2.00024	2.00033
	2.00084	2.00038	2.1638
	2.00031	2.00038	2.3292
	2.00061	2.4698	3.16885
	2.0013	2.00115	3.89867
	2.00042	2.00099	3.06723
	2.00051	2.00027	2.01363
	2.0015	2.00066	2.0211
	2.00194	2.63428	11.024
	2.00024	2.72009	2.23654
	2.00011	2.00006	2.56715
	2.00094	2.00858	2.0003
	2.00172	2.00139	2.00136
	2.00052	2.00083	2.00061
	2.00028	2.00026	3.0139
	2.00011	2.00003	2.00078
	2.00025	2.00981	2.00038
	2.00023	2.58216	2.52485
	2.00052	2.35588	2.00028
	2.0005	2.00043	2.00187
	2.00098	2.00018	2.00031
	2.00058	2.00075	2.0002
	2.00029	3.55559	3.24886
	2.00055	2.00009	3.23807
	2.00042	2.00356	2.00238
	2.00151	2.0007	2.00045
	2.00019	2.00015	2.46492
	2.0006	2.00078	2.0005
	2.00101	2.00096	2.00088
	2.00121	2.00162	2.00085
	2.70285	2.0006	16.5852
	2.00088	2.00023	2.00092
	2.00032	2.00042	2.00032
	2.00037	2.00047	2.00025
	2.00058	2.00027	2.00067
	2.00102	2.00063	2.00124
	2.00064	2.00045	2.00042
	2.00062	2.00019	2.00024
	2.00089	2.00034	2.00026
	2.00042	2.21022	3.7872
	5.27857	9.20601	2.01181
	2.00021	2.00027	2.00084
	2.35501	2.00077	10.0492
	2.00046	2.00024	2.00758
	2.00125	2.00101	4.16569
	2.00097	3.89084	2.00013
	2.00012	2.00053	2.00055
	2.00122	2.0007	4.75711
	2.00071	2.00027	2.00181
	2.00025	2.00027	2.71127
	2.00048	2.68089	2.00027
	2.0005	3.56253	2.00048
	2.00105	2.00042	2.00156
	2.00056	2.00045	2.00062
	2.00063	2.00139	3.36694
	2.00027	2.00106	2.00049
	2.00029	3.24471	2.00165
	2.00053	4.45513	2.00029
	2.00195	2.00032	2.00049
	2.0023	2.0001	2.00068
	2.0003	2.00047	2.00069
	2.88654	2.00075	2.00039
	2.00046	4.37616	2.00089
	2.47467	4.83574	2.00031
	2.00061	2.00071	2.00052
	2.00083	2.0005	3.00071
	2.00209	2.00027	2.00093
	2.00112	15.9777	2.33212
	2.0004	2.00024	2.00057
	2.00059	2.01094	2.19097
	2.00057	2.00051	2.00025
	2.00099	2.00041	2.48668
	2.00215	2.00005	2.00079
	2.00078	2.00008	2.00067
	2.00029	4.05665	2.0003
	2.00064	2.0007	2.00009
	2.00018	2.00039	2.001
	2.00064	2.00068	2.00022
	2.00009	2.00011	2.0015
	2.00008	2.00021	2.67191
	2.00009	2.87012	2.00094
	2.00034	2.00031	2.00426
	2.00041	4.66669	2.00018
	2.00026	2.00154	3.78326
	2.00019	2.00012	2.00062
	2.0015	2.00351	5.61152
	2.00025	4.06581	2.00114
	2.00031	2.00036	2.00016
	2.00012	2.00061	2.00134
	2.00061	3.27435	2.0009
	2.00013	2.00077	2.00054
	2.00056	2.00063	2.00044
	2.00009	2.36336	2.3035
	2.00045	2.00299	2.0008
	2.00064	3.01086	2.21886
	2.00101	2.00258	15.8675
	2.00016	6.85289	2.0013
	2.00102	2.00087	4.26583
	2.00089	2.00044	5.31119
	2.0003	2.0007	2.00021
	2.00007	2.0003	7.48745
	2.00079	2.00033	2.00052
	2.00068	2.00069	2.00011
	2.00029	2.00044	2.0004
	2.00086	2.00024	2.00052
	2.00125	2.0005	3.66505
	2.00008	2.00024	2.00026
	2.00062	2.00026	8.08407
	2.00069	2.00025	2.64615
	2.0004	2.0005	3.37237
	2.00049	2.80254	2.00096
	2.25296	2.00028	2.00089
	2.00047	2.00114	2.00056
	2.00036	2.00086	2.00052
	2.00116	2.00067	4.20205
	2.00046	2.00115	2.0001
	2.00042	2.00044	3.2167
	2.00095	2.00049	2.01675
	2.00052	2.00042	2.00619
	2.00132	2.00093	2.00067
	2.00085	2.00034	2.00031
	2.00027	2.0006	2.00085
	2.00107	2.00038	2.00071
	2.00043	2.00031	2.00016
	2.00058	2.00061	2.00058
	2.00015	2.00093	2.00063
	2.00033	2.4779	2.00071
	2.00013	4.56469	2.00029
	2.00051	2.00038	2.00053
	2.00035	2.00057	2.00104
	2.00076	2.00073	2.22351
	2.00042	2.84614	4.89304
	2.00009	2.00058	2.00036
	2.0005	2.00008	5.0856
	2.0019	2.00087	2.00046
	2.00104	2.00037	2.00033
	2.00055	2.00049	2.00052
	2.00188	2.00248	2.00021
	2.00057	2.00081	2.00042
	2.00022	2.00054	2.00378
	2.00124	2.00065	2.0007
	2.00075	2.00055	2.22201
	2.00006	2.00014	2.00096
	2.00027	2.00107	2.00088
	2.00207	2.00012	2.00012
	2.00045	2.00042	14.8179
	2.00155	2.00042	2.00025
	2.00158	2.00233	2.00203
	2.00073	2.00114	2.00093
	2.00026	2.00014	2.00287
	2.0006	2.0001	2.0004
	2.00109	2.00012	2.00128
	14.1187	2.00011	2.0004
	2.00327	2.00028	14.607
	2.00043	2.00019	3.09094
	2.00073	2.00026	2.00046
	2.00093	2.00009	2.00008
	2.00156	2.00049	2.00052
	2.00436	3.2796	2.00054
	2.00017	2.00042	2.00059
	2.00017	2.00035	2.00024
	2.00045	2.00053	2.0005
	2.06027	2.00041	2.00124
	2.00108	2.00051	2.00012
	2.00134	2.00108	2.00043
	2.00026	3.78695	2.0005
	2.00004	2.00068	2.09023
	2.21401	2.00042	4.03972
	2.00028	2.00702	2.00041
	2.00014	2.01775	2.00005
	6.18636	2.00195	2.00143
	2.86105	2.00016	2.40177
	2.0006	2.00018	2.00561
	4.512	2.00082	2.00171
	2.00036	2.00099	2.00036
	3.31158	2.00051	2.00015
	2.43033	2.00125	7.27408
	2.00199	2.00062	2.00037
	2.00155	2.0003	2.00046
	2.00028	2.00043	2.00187
	2.00099	2.00045	2.00104
	2.00087	2.00141	2.00088
	2.47782	2.00025	2.00046
	2.00057	2.00048	2.00035
	2.00074	3.42702	5.35545
	2.00044	2.00013	3.19084
	2.00033	2.00034	2.00025
	2.00021	2.00026	2.00077
	2.00026	2.00005	2.00047
	2.00043	2.0002	2.00046
	2.00059	2.0005	2.00009
	2.30024	2.00118	2.00075
	2.3767	2.00483	4.70798
	2.00017	2.0004	2.00067
	2.5001	2.00047	2.00057
	2.00099	2.00045	2.00032
	2.00073	2.00067	2.00117
	2.78903	2.00013	2.00031
	2.00076	2.00045	2.00125
	2.00043	2.00182	2.00028
	2.00007	2.00039	2.00096
	2.35834	2.00065	2.00024
	2.00039	2.0013	2.00022
	2.00006	2.00018	2.00103
	2.00048	2.00089	5.26523
	2.00033	2.00016	2.00074
	2.00029	2.00047	2.00047
	4.50843	2.00019	2.00134
	2.00089	3.90687	2.00048
	6.02553	2.00075	2.00051
	2.00048	2.00067	2.0034
	5.01681	2.00081	2.94369
	2.00177	2.00057	2.00047
	2.00078	2.00033	2.00052
	3.99967	2.00127	2.00042
	2.58542	2.00109	2.00338
	2.00076	2.00021	2.00035
	2.00055	2.00078	2.00069
	2.00079	2.00027	2.37322
	2.00066	2.00005	2.0033
	2.00088	2.00149	2.00029
	2.00049	2.0006	2.00127
	2.00173	2.00064	2.00055
	2.00101	2.00052	2.00039
	2.00069	2.00022	2.00037
	2.00174	2.00715	3.2381
	2.00042	2.00094	2.00079
	2.00153	2.00068	2.00047
	2.0005	2.00086	2.00075
	2.39397	2.86781	2.00016
	2.00015	2.55333	2.00016
	2.00106	2.00074	2.00095
	2.00061	2.0013	2.42081
	2.00028	2.00102	2.00046
	2.00037	2.00045	2.00119
	2.00002	2.00026	2.0006
	2.00037	2.00042	2.00087
	4.88319	2.0003	2.00036
	2.00121	2.6659	4.45704
	2.00013	2.15774	2.00067
	2.00009	2.00249	2.00058
	2.00036	2.16579	2.00087
	2.00009	2.00231	3.13269
	2.00035	2.00132	2.00072
	2.00063	2.00105	2.6895
	2.00049	2.00084	2.00124
	2.00025	2.58024	6.9024
	2.00044	2.34737	4.99015
	2.00032	2.00135	2.69827
	2.00053	4.54827	2.00117
	2.00033	2.43792	6.28705
	2.00013	3.64721	2.65585
	2.00016	2.70221	5.00941
	2.00046	2.00018	2.00071
	2.00065	4.66104	2.00257
	2.00006	2.00027	2.00203
	2.0003	2.0005	2.00026
	2.00044	3.64122	2.00068
	2.00029	2.00125	2.00128
	2.00071	2.55685	2.00083
	2.5257	2.00068	2.00018
	2.00062	2.00016	2.00121
	2.00005	2.36711	2.00691
	2.00058	2.00079	2.00022
	2.00027	2.00038	2.00059
	2.00018	2.96847	2.00023
	2.00039	2.00098	2.00103
	2.00038	2.0005	2.00049
	2.00037	2.00057	2.00049
	2.00072	3.20619	2.00017
	2.00067	2.00074	2.0003
	2.00142	2.52739	2.00042
	2.00761	3.81933	2.00346
	2.0004	2.00045	2.00064
	2.00025	3.76318	2.00028
	2.00023	4.68082	2.00012
	2.00063	2.00065	2.0009
	2.00056	2.00071	2.0002
	2.00072	2.00024	2.00403
	2.00023	2.00101	2.00023
	2.00028	2.00085	2.00031
	2.00055	7.55425	2.001
	2.00231	2.00033	2.00192
	2.00072	3.55957	2.00072
	2.00084	2.00071	2.0706
	2.00035	2.00405	2.07265
	2.00034	2.0008	2.93173
	2.00011	2.00106	2.00164
	2.74606	2.0003	2.00018
	2.00163	2.0005	2.00025
	2.00047	2.00037	2.00134
	3.79699	2.00018	2.00056
	2.00047	2.0003	2.0007
	2.00626	2.00079	2.00042
	2.00095	2.0008	2.00044
	2.00055	2.00826	2.00038
	3.68982	2.0005	2.00028
	2.00071	2.00101	2.00022
	2.00052	2.00036	2.00047
	2.0006	2.00036	2.0004
	2.00019	2.0004	2.00057
	2.0082	2.00072	2.00043
	2.00068	2.00064	2.00243
	2.00016	2.00008	2.0004
	2.00039	2.0011	2.00035
	2.00058	2.20674	2.00013
	2.0103	2.00049	2.0005
	2.00073	2.00059	2.00009
	2.00024	3.39006	2.00049
	2.00024	2.00082	2.00088
	2.00178	2.00045	2.00046
	2.00002	2.00025	2.00127
	3.76854	2.00021	2.00024
	2.00094	2.00101	2.00047
	2.00045	2.00035	2.00084
	2.00073	2.00104	8.13601
	2.00037	2.46793	2.00374
	2.00043	2.0001	2.00156
	2.01017	2.00069	2.00028
	2.00056	2.00105	2.00052
	2.00029	3.11255	2.00063
	2.00013	2.00059	2.00085
	2.00055	2.0003	2.0001
	2.00031	2.00075	2.00088
	2.00933	2.00022	2.67462
	2.00141	2.00053	2.00069
	2.00049	2.52371	2.00012
	2.00079	2.00046	2.00059
	2.00073	2.00018	2.00028
	2.00154	6.16705	5.56869
	2.00015	2.00071	2.00011
	2.00005	2.00004	2.09365
	2.00056	2.00071	2.00038
	2.38941	2.0004	2.00028
	2.00042	3.68012	2.00043
	2.00346	2.02434	2.00037
	2.00043	2.00211	2.00063
	2.00049	2.00034	2.00023
	2.00039	2.00064	2.00034
	2.0003	2.34569	2.68217
	3.61903	2.00048	2.00033
	2.00049	2.00073	2.78261
	2.0004	2.00155	2.11561
	2.00069	2.00074	2.00033
	2.0011	2.00069	2.00032
	2.00051	2.00049	2.00105
	3.97923	2.00025	2.00073
	2.00051	2.00038	2.0006
	2.00013	2.00067	2.00077
	2.0036	2.00061	5.31846
	2.00051	2.00013	2.00127
	2.00021	2.00063	2.00145
	2.00103	2.00057	2.00052
	2.00035	2.0009	2.00045
	2.00044	2.29357	2.00013
	2.21605	2.00122	2.0006
	2.00062	2.00018	2.00134
	2.00012	2.00059	2.00033
	2.00032	2.00104	2.00053
	2.00067	2.00053	2.00079
	2.00288	2.00019	2.00022
	2.00047	2.00101	8.72223
	2.00089	2.00057	2.0001
	2.00119	4.03441	2.0009
	2.00039	2.00087	2.00001
	2.08393	2.00084	2.0002
	2.00116	2.00025	2.00074
	2.17012	4.91434	2.00042
	2.0003	2.00024	2.00021
	2.19215	2.00084	2.00038
	2.35957	2.00017	2.00046
	2.00037	2.18339	2.00045
	2.00022	2.00076	2.00038
	3.6369	9.95376	2.00033
	3.35543	2.00114	2.00086
	2.00148	2.00022	2.00064
	2.00097	2.00235	2.0007
	2.00044	2.00029	2.00012
	2.00043	4.58165	2.00168
	2.00102	2.00148	2.00045
	2.00086	2.00061	2.00179
	2.00051	7.42245	2.00055
	2.00041	2.00008	2.00062
	2.0004	2.00049	2.0006
	2.00037	2.00014	2.63411
	2.65741	2.1963	2.00056
	2.00053	2.00037	2.00065
	2.00168	2.69144	2.00038
	2.00057	2.00033	2.61517
	2.00089	2.00044	4.1541
	2.0004	2.00034	2.00032
	2.00021	2.00155	2.00021
	2.0006	2.00036	2.00135
	2.00027	2.00118	2.00036
	2.00112	2.00075	2.55845
	2.00068	2.0007	2.00051
	2.0013	2.00094	2.00048
	2.00078	2.00035	2.00026
	2.00085	2.00032	2.00087
	2.00093	2.00063	2.00033
	2.00017	2.00039	2.00066
	2.00078	2.00123	10.082
	2.00086	2.00041	2.0003
	2.00027	2.0005	2.00084
	2.00022	2.00031	2.00054
	2.00038	2.00024	2.00053
	2.00023	2.00118	2.00101
	2.00089	2.00077	2.00061
	2.00039	2.00078	2.00065
	2.00099	2.21744	2.00027
	2.00014	2.00029	3.61715
	2.00049	4.1283	2.00104
	2.00044	2.00163	2.0001
	2.0011	2.00063	2.00161
	2.00062	2.36506	4.67485
	2.00025	2.0033	3.33811
	2.00035	2.00058	2.00107
	2.00025	2.00275	2.00014
	2.00103	2.00212	3.01172
	2.00047	2.00044	2.55983
	2.00043	2.00376	2.00029
	2.00057	2.00062	2.00064
	2.0007	2.00105	2.00071
	2.0004	2.00064	2.00087
	2.00084	2.00111	2.00035
	3.40087	4.0745	2.00025
	2.0003	2.00085	8.3906
	2.00049	2.00057	2.00152
	2.0006	2.0014	2.00044
	2.0022	2.00029	2.00057
	2.52478	2.8293	2.0008
	2.00035	3.08829	2.4088
	2.54516	2.66474	2.00132
	2.00054	2.00024	2.00009
	2.00088	2.00018	2.00402
	2.00033	2.00048	2.00057
	2.00047	2.00057	2.00007
	2.00053	2.00057	2.37674
	2.00084	2.00063	2.0003
	2.00477	2.00107	2.00306
	2.0003	2.00077	2.00284
	2.00049	2.00068	2.00042
	2.00098	2.00007	5.53715
	2.00127	2.0008	2.00024
	8.63544	2.00055	2.00049
	2.00095	2.00042	4.12167
	2.00076	2.00047	2.00042
	2.00075	2.0011	2.00069
	2.00006	2.00096	2.00089
	2.00037	2.00022	2.0005
	2.00046	2.00187	2.00012
	2.00027	2.00026	2.00034
	6.26805	2.00033	2.00084
	2.00037	2.00019	2.00023
	2.00071	4.98012	2.30138
	2.0013	2.00018	2.00024
	2.00082	2.00114	2.00027
	2.00019	2.00448	2.00392
	3.40191	2.00048	2.00046
	2.00003	2.64112	2.00025
	2.00023	2.00073	2.24842
	2.00074	2.00075	2.00085
	2.00057	2.00073	2.0049
	3.35243	2.00033	2.00141
	2.00025	2.23016	2.00036
	2.80076	2.68219	2.00015
	2.0006	2.00087	8.10952
	2.00197	2.00028	2.00051
	2.38067	2.00144	2.00133
	2.00069	2.00079	2.00036
	2.00087	2.00008	2.00018
	2.00034	2.11328	2.00086
	2.00023	2.00098	2.0013
	2.00073	2.00104	2.00032
	2.00033	2.00021	2.00013
	2.00034	2.93902	2.99622
	2.00111	2.00109	2.00136
	2.00492	2.00044	2.00296
	2.0004	2.00073	3.07164
	2.25627	2.00017	2.00059
	2.68857	2.00096	2.00032
	2.00049	2.22462	14.8597
	2.00106	2.00092	2.00038
	2.00057	2.00115	2.43413
	2.00031	2.00156	2.00038
	2.00017	2.00032	2.0007
	2.0004	2.00065	2.0005
	2.00067	2.00091	6.43653
	2.00074	2.00026	2.00063
	2.0011	2.00039	2.00055
	2.001	2.00079	2.00061
	2.00055	2.00041	7.81331
	2.00084	2.00028	2.00062
	2.00192	2.00029	2.39754
	2.0006	2.00013	2.00061
	2.00026	2.0007	2.00028
	2.00031	2.00029	2.00092
	2.00027	2.00038	2.00099
	2.00077	2.00101	3.41411
	2.00037	2.00031	3.69626
	2.00079	2.0003	3.92341
	2.00063	2.0016	2.02052
	2.00064	2.00015	2.00085
	2.00066	2.00078	2.00018
	2.00179	2.00011	2.00008
	2.00018	2.00002	2.00003
	2.00129	2.00004	2.00046
	2.00164	2.00056	2.98445
	2.00092	2.00039	2.00059
	2.00033	2.00117	2.00089
	2.00007	2.00052	2.00101
	2.00065	2.00024	2.24167
	2.00026	2.00054	2.00015
	2.00025	2.0004	2.00042
	2.00036	2.00048	2.00047
	2.00052	2.00058	2.00103
	2.10078	2.00022	2.00081
	2.00067	2.00023	2.00017
	2.00949	2.00026	2.0002
	2.00053	2.00068	2.00038
	2.00035	2.0004	2.00037
	2.00057	2.0012	2.18311
	2.00033	2.00029	2.00013
	2.00061	2.0003	2.00022
	2.00094	2.0008	2.00113
	2.00014	2.00165	2.41379
	2.00151	2.00026	2.00022
	2.00048	2.0004	2.00039
	2.00047	2.00107	2.00063
	2.00024	2.00059	2.00045
	2.00024	2.00037	2.00006
	2.00074	2.00031	2.00027
	2.00028	2.00046	2.00037
	2.00103	2.00107	2.00029
	2.00069	2.00083	2.00064
	2.00043	2.0005	2.00139
	2.00032	2.00148	2.00014
	2.00046	2.00036	3.24114
	2.00072	2.00062	3.31137
	2.00045	2.00092	2.00041
	2.00023	3.13877	2.00062
	2.00066	2.00008	3.80558
	2.0001	2.00048	5.367
	2.00204	2.00045	2.00073
	2.00021	2.00029	2.00068
	2.00089	2.00138	2.0009
	2.00048	2.00025	2.00867
	2.00045	2.00267	2.00119
	2.00016	2.00039	4.49769
	2.00187	2.00029	4.02316
	2.00014	2.00019	2.00054
	2.0008	2.00065	2.00055
	2.00026	2.00051	2.00183
	2.00035	2.0005	2.00018
	7.26702	2.00083	2.00075
	2.00122	2.00046	5.28559
	2.00026	2.00069	2.98245
	2.00142	2.00052	2.00045
	2.00028	2.00088	2.46168
	2.00042	4.23759	2.00039
	2.00218	2.00089	2.00125
	2.00044	2.00066	2.00016
	2.00046	2.00048	2.00007
	2.00012	2.00028	2.0004
	2.0005	2.00017	2.0004
	2.00031	2.00065	2.00054
	2.0022	2.0005	2.0034
	2.00127	2.00085	2.00127
	2.00028	2.00044	4.9221
	2.00056	2.00059	2.00201
	2.00065	2.0002	2.00042
	2.0005	2.00045	2.00057
	2.00032	2.00109	4.70286
	2.00024	2.00005	2.00047
	2.00084	2.00104	2.00043
	2.00297	2.0005	2.00044
	2.00078	2.00054	2.30825
	5.36482	2.00017	2.00069
	2.0004	2.00134	2.00018
	2.0004	2.22908	3.99821
	2.00073	2.78382	2.00054
	2.00007	2.00059	2.00105
	2.00018	2.0003	2.00113
	2.00141	2.00062	2.00083
	2.00048	2.25855	2.00053
	2.00078	2.00042	2.00063
	2.00044	2.00043	2.0011
	2.00074	2.00034	2.0005
	3.03026	2.00062	2.00087
	2.00155	2.00017	2.00073
	2.41242	2.00019	2.00031
	2.31859	2.0074	2.00049
	2.00175	2.00071	2.00024
	2.00095	2.00022	2.00035
	2.20558	2.24515	2.00091
	2.87876	2.00023	2.0008
	4.50165	2.00048	2.00135
	2.00082	2.00073	2.00042
	2.00147	2.00029	2.00016
	2.0001	2.00043	2.00055
	2.84001	2.00034	2.00052
	2.00127	2.00105	2.00059
	2.00073	2.00103	2.00269
	2.0001	4.8122	2.00029
	2.32389	2.00092	2.00067
	2.00108	2.3866	2.0008
	2.73878	2.00089	2.00121
	2.00063	2.00008	2.00024
		2.00029	2.00057
		2.01207	2.00059
		2.00051	2.39405
		2.00041	2.00039
		2.51737	2.0003
		2.00014	2.00007
		2.00052	2.00015
		2.00027	2.0009
		2.00689	2.00062
		2.00024	2.00042
		2.00056	2.00063
		2.00035	4.67038
		2.00059	2.59012
		2.00068	2.00343
		2.00031	2.00014
		2.0004	2.00069
		2.00045	2.9838
		2.00021	2.37909
		2.0002	2.62789
		2.00035	2.2519
		2.00079	2.00035
		2.00024	5.19616
		2.00017	2.00024
		2.00099	2.0002
		2.0007	2.00235
		2.00121	2.00072
		2.0007	2.00561
		2.00085	2.00076
		2.00137	2.00054
		2.0003	2.00045
		2.00039	7.88715
		2.00047	2.00055
		2.00065	2.00108
		2.00034	2.00052
		2.00046	2.00065
		2.0007	2.00103
		2.00143	10.0526
		2.00028	2.00123
		2.00023	2.00099
		2.00025	2.00905
		2.00033	2.0004
		2.00027	2.00161
		2.00049	2.00061
		2.00026	5.32886
		2.00034	2.00087
		2.00036	2.00019
		2.00027	6.59569
		2.00058	2.00066
		2.00088	2.00095
		2.00037	2.00107
		2.00037	2.00017
		2.00023	2.00004
		2.00026	2.00013
		2.00079	4.9932
		2.00021	2.0005
		2.0011	2.00042
		2.00202	2.00047
		2.00111	2.00103
		2.52066	2.00018
		2.0006	2.9049
		2.00057	2.00072
		2.00022	2.00157
		4.49552	2.00003
		2.00019	2.00114
		2.00143	2.00025
		2.00057	2.001
		2.00061	2.00039
		2.0003	2.00046
		2.00095	2.00022
		2.63749	4.64713
		2.00062	2.0005
		2.00093	2.00039
		2.00027	2.00098
		2.00038	2.00071
		2.00032	2.002
		3.48509	2.00023
		3.39711	2.00065
		3.94542	2.00035
		2.79693	2.00021
		2.00042	2.00031
		2.00056	2.00044
		2.00086	2.0003
		2.00062	5.22998
		2.20055	2.00045
		2.00099	2.00056
		2.59127	2.00023
		2.00058	2.0005
		2.00043	5.49547
		2.00081	3.45702
		2.00009	5.63774
		2.00027	5.62851
		2.00049	2.00023
		2.00066	2.0005
		2.00035	2.00132
		2.00046	2.00056
		2.00025	2.00091
		2.48585	2.00021
		2.00067	2.00026
		2.00043	2.00039
		2.29783	2.00221
		2.00044	2.00046
		2.00033	2.0005
		2.00023	2.00046
		2.00031	2.00038
		7.44675	2.00081
		2.00167	2.00023
		2.01107	2.00042
		2.83058	2.00413
		2.00088	2.0002
		2.00087	2.00132
		2.00114	2.00023
		2.00009	2.00066
		2.00036	3.1438
		2.00042	2.00039
		2.00049	2.0009
		2.00087	2.00208
		4.36203	6.1636
		2.00015	2.00119
		2.00082	2.00051
		2.00048	2.0003
		2.00018	2.00094
		2.0003	2.00043
		3.47934	2.00035
		2.00046	2.00108
		2.00044	2.11143
		2.36681	2.00073
		6.78336	2.00096
		2.00094	2.00058
		2.00028	2.07979
		2.00025	6.13001
		2.00159	2.0007
		2.00048	4.77854
		2.00045	2.00245
		2.00032	2.00248
		2.00019	2.00073
		9.21449	2.00034
		2.001	2.00018
		2.00063	2.00049
		2.00043	2.00016
		2.00279	2.00044
		2.00095	2.00076
		2.00053	2.00046
		2.00023	2.0004
		2.00044	2.0018
		2.0006	2.0003
		2.00055	2.00186
		2.00035	2.00021
		2.00104	2.00054
		2.00062	2.0002
		2.00912	2.00222
		2.00266	3.30608
		2.00043	2.00077
		2.00045	2.00081
		2.00031	2.00072
		2.00094	2.00037
		2.00014	2.00087
		2.00069	2.00052
		2.00082	2.00025
		2.05468	2.00064
		2.00032	2.00033
		2.00117	2.0006
		2.00013	2.00074
		2.0005	2.00062
		2.00024	2.00041
		2.0003	2.00013
		2.00065	2.00034
		2.00069	2.00049
		2.00066	2.00244
		2.00026	2.00076
		2.00017	2.00081
		2.00056	2.00289
		2.00022	2.0003
		2.00017	2.00076
		2.00015	2.00037
		2.00202	2.00019
		2.00114	2.00048
		2.6681	2.20899
		2.00068	2.00076
		2.00043	2.00024
		2.00024	2.00042
		2.00019	2.00043
		2.00106	2.0021
		2.00064	2.00103
		2.00042	2.00013
		2.00071	2.00032
		2.00014	2.00105
		2.00027	2.00066
		2.00114	2.00801
		2.00009	2.00009
		5.47103	2.00111
		2.32096	2.00033
			2.00019
			2.00044
			2.00038
			2.00034
			2.00011
			2.00022
			2.0001
			2.00115
			2.00038
			2.00021
			2.00093
			2.00019
			2.00075
			2.00018
			2.00024
			2.00056
			2.0029
			2.00037
			2.00415
			2.29377
			2.00029
			2.00055
			2.0009
			2.00073
			3.25026
			2.00045
			2.00043
			4.91047
			4.27973
			2.00389
			2.00035
			4.88717
			2.0008
			2.00039
			2.00025
			2.00024
			2.00012
			2.00055
			2.00045
			2.00029
			2.00098
			2.0009
			2.00027
			2.00013
			2.27647
			2.0013
			2.00055
			2.00043
			2.00025
			2.0005
			2.00022
			2.00035
			2.00123
			2.00042
			2.00072
			2.00021
			2.00205
			2.0006
			2.00098
			2.00016
			2.00046
			2.00043
			2.00044
			2.00026
			2.00052
			2.00079
			2.00057
			2.00053
			2.00078
			2.00558
			2.00036
			2.00074
			2.0002
			2.00046
			2.00022
			2.00036
			2.00165
			2.00074
			2.00057
			2.00041
			2.0005
			2.00014
			2.00135
			2.00049
			2.00066
			2.00103
			2.00054
			2.00075
			2.00021
			2.00059
			2.00047
			2.00075
			2.66492
			2.00049
			2.0007
			2.00044
			2.00035
			2.00031
			2.00026
			2.00014
			2.00016
			2.00106
			2.00107
			2.00023
			2.0096
			2.00072
			2.00041
			2.0003
			2.53778
			2.0003
			2.00062
			2.00017
			2.0024
			2.0005
			2.00027
			2.00029
			2.00052
			2.00068
			2.0003
			2.58473
			2.00053
			2.00036
			2.00049
			2.00033
			2.00022
			2.00017
			2.00076
			2.00055
			2.00111
			2.00126
			2.00028
			2.00043
			2.00036
			2.00035
			2.00072

## Sheet: Cell Surface contact area (um2)
	35 nm						50 nm								70 nm
video frame	Cell1	Cell2	Cell3	Cell4	Cell5		Cell1	Cell2	Cell3	Cell4	Cell5	Cell6	Cell7		Cell1	Cell2	Cell3	Cell4	Cell5	Cell6	Cell7	Cell8	Cell9	Cell10	Cell11	Cell12
1	1245.96	853.372	447.824	905.816	787.562		709.375	382.671	648.972	900.183	994.278	669.157	763.995		560.478	649.316	470.475	410.718	530.836	623.165	520.496	246.3	237.166	399.495	237.166	399.495
2	1245.96	827.867	462.106	933.928	828.481		712.822	419.076	679.131	946.897	1036.57	669.157	750.897		560.478	649.316	411.795	385.773	559.659	472.285	520.496	246.3	237.166	389.413	237.166	389.413
3	1213.07	822.804	447.523	953.822	792.064		686.196	419.076	673.745	847.276	1007.6	663.976	794.207		560.478	573.274	373.752	395.596	579.995	496.326	520.496	245.664	282.652	435.685	282.652	435.685
4	1272.04	815.879	432.292	1004.61	792.064		677.364	400.335	611.661	877.801	1001.02	594.137	949.589		560.478	547.897	345.274	378.491	564.571	496.326	520.496	245.664	308.146	426.379	308.146	426.379
5	1282.22	772.935	439.509	977.648	792.064		698.475	400.335	682.254	877.801	1001.02	594.137	972.941		596.194	580.038	350.444	389.779	575.557	496.326	439.8	246.267	358.091	437.204	358.091	437.204
6	1282.22	726.06	427.995	1051.39	792.064		684.473	400.335	720.534	812.4	1069.24	512.848	978.057		596.194	592.317	379.052	393.743	567.716	496.326	439.8	243.779	336.819	445.358	336.819	445.358
7	1282.22	634.937	427.995	1059.6	792.064		670.428	409.598	701.814	818.227	1084.42	591.369	970.883		596.194	554.704	367.031	343.68	592.403	493.999	433.466	251.491	336.819	445.358	336.819	445.358
8	1282.22	624.156	434.027	1033.09	899.138		683.913	409.598	721.396	822.438	1074.62	589.161	1074.6		596.194	623.595	365.222	343.68	572.369	493.999	433.466	251.491	346.9	424.914	346.9	424.914
9	1235.82	618.975	434.167	1065.11	880.117		668.704	412.097	706.833	822.438	1036.45	589.161	1074.13		596.194	685.378	354.235	348.936	596.797	493.999	388.099	245.406	346.9	424.914	346.9	424.914
10	1235.82	570.107	450.463	1065.77	880.117		647.378	412.097	753.149	962.859	1056.73	572.412	1005.82		559.401	737.035	351.004	346.265	596.97	410.072	388.099	245.406	367.914	413.271	367.914	413.271
11	1235.82	529.102	453.317	987.977	880.117		656.555	358.673	787.282	904.739	1048.71	590.626	955.33		559.401	701.06	369.013	356.519	651.385	404.213	388.099	245.406	367.914	441.889	367.914	441.889
12	1204.12	525.86	498.868	952.444	888.313		648.455	358.673	699.337	876.853	1083.17	539.194	960.877		559.401	694.985	374.959	356.519	696.364	501.841	388.099	245.406	361.99	458.541	361.99	458.541
13	1204.12	499.352	436.062	978.434	1074.52		647.421	358.673	650.738	837.679	1107.73	539.194	948.006		559.401	615.28	378.75	405.247	724.325	501.841	388.099	245.406	361.99	417.892	361.99	417.892
14	1204.12	460.426	503.068	967.684	1086.05		636.262	389.478	648.67	859.587	1107.73	539.194	932.582		559.401	607.396	389.779	405.247	713.167	501.841	397.793	245.406	373.343	343.981	373.343	343.981
15	1179.04	462.763	533.83	904.653	1125.92		636.262	411.666	618.156	855.72	1107.73	508.303	1029.43		559.401	558.582	372.029	389.607	647.119	575.428	397.793	245.406	282.458	330.378	282.458	330.378
16	1179.04	462.763	525.321	780.453	1125.92		607.741	390.77	627.204	855.72	1049.39	508.303	996.874		559.401	521.831	366.385	373.149	650.911	575.428	397.793	288.263	282.458	329.354	282.458	329.354
17	1157.79	462.763	490.66	845.186	1154.11		524.029	390.77	606.136	861.235	1012.18	508.303	1018.36		559.401	538.074	366.385	373.149	650.911	575.428	397.793	288.263	316.149	329.354	316.149	329.354
18		524.535	472.36	822.944	1217.47		524.029	390.77	596.474	939.411	1057.72	508.303	1035.73		559.401	543.761	366.385	358.544	628.722	577.108	397.793	288.263	316.149	293.853	316.149	293.853
19		524.535	469.161	822.944	1185.81		449.278	386.247	603.561	914.185	1032.56	488.657	954.792		559.401	583.183	366.385	358.544	595.117	577.108	397.793	242.928	325.972	262.133	325.972	262.133
20		581.373	444.442	822.944	1184.65		449.278	397.707	567.823	832.412	1032.56	472.328	927.67		559.401	611.015	386.376	368.453	595.117	512.482	397.793	242.928	338.337	267.766	338.337	267.766
21		610.25	564.495	700.877	1158.98		449.278	413.303	585.014	849.096	985.403	489.282	896.661		559.401	563.752	386.376	376.854	543.804	512.482	397.793	195.654	249.143	267.766	249.143	267.766
22		602.592		700.877	1222.38		449.278	432.174	585.531	831.292	965.39				567.113	620.795	398.784	395.768	543.804	603.432	397.793	195.654	234.721	267.766	234.721	267.766
23		602.592		727.718	1246.32		528.122	423.342	596.119	835.072	941.985				567.113	644.879	366.557	395.768	543.804	613.514	397.793	195.654	234.721	267.766	234.721	267.766
24		601.246		710.28	1194.18		541.348	423.342	629.261	885.922	946.433				567.113	648.11	387.625	419.421	543.804	613.514	397.793	195.654	230.886	301.899	230.886	301.899
25		541.327		701.986	1194.18		551.43	406.539	565.895	900.851	912.666				567.113	648.11	378.793	424.979	525.45	592.273	397.793	195.654	230.886	297.192	230.886	297.192
