# Supplementary material for: Integrin α5β1 nano-presentation regulates collective keratinocyte migration independent of substrate rigidity
Source: eLife. 2021 Sep 23;10:e69861. doi: 10.7554/eLife.69861 (PMC8460267; doi:10.7554/eLife.69861)
Supplement: Figure 3—source data 1. [file elife-69861-fig3-data1.xlsx]

## Sheet: Stress CL
	stress Correlaton length (µm)
	HaCaT			hKC			nHEK
	35nm	50nm	70nm	35nm	50nm	70nm	35nm	50nm	70nm
a5b1 mimetic	57	39	45	136	347	346	172	351	341
	35	68.5	38.5	130	428	300	336	347	276
	30.4	57	33.5	287	475	376	344	350	225
	28.7	221	40.8	238	308	143		428
	11	152	113	100	412	337		421
	144	217	126		436	334		435
	11	322	258
	49	344	7
	87	133	10
	126.9	180	16

## Sheet: Absolute Traction and Stress
	Absolute Traction values (Pa)																											Absolute stress values (Pa)
	35nm								50 nm								70nm											35nm								50 nm								70nm
	51.298	90.309	61.227	33.118	131.65	164.59	25.094		213.04	56.335	362.64	10.902	53.919	21.838	42.021		162.98	162.98	177.31	42.021	37.477	98.936	106.92	92.958	137.86	45.345		0.84125	0.46893	0.45899	0.45164	0.91254	0.40266	0.86634		0.44829	0.083942	0.84083	0.1081	0.137	0.14398	0.61905		1.2433	1.4689	4.4846	1.1016	1.352	0.2262
	66.678	179.93	60.987	206.39	12.53	93.804	32.064		585.27	61.527	202.07	61.692	43.266	22.984	68.117		143.87	143.87	165.1	68.117	92.056	91.263	188.17	139.59	142.49	31.748		0.45434	0.40001	1.0646	0.8308	0.22237	0.12161	0.23443		0.66731	0.68045	1.184	0.20294	0.26999	0.57731	0.26259		0.52593	0.2325	0.73525	0.53011	0.84114	0.69048
	66.439	213.59	66.917	193.6	19.868	65.744	36.947		522.24	60.232	161.82	71.963	40.156	21.694	63.895		118.9	118.9	176.27	63.895	101.79	69.968	233.03	121.88	137.47	31.06		0.37951	0.89494	0.49178	0.48935	0.067841	0.43605	0.56084		1.4839	0.67322	2.8867	0.2339	0.13417	0.39524	0.6334		0.59318	0.14137	1.3977	1.6482	0.65213	0.74462
	67.398	228.92	75.471	168.01	29.234	48.735	44.443		452.14	59.245	128.46	80.555	39.519	20.775	59.885		95.823	95.823	183.35	59.885	104.38	52.616	270.81	103.95	132.17	31.827		0.55488	0.1365	1.0945	0.25542	0.64348	0.091766	0.52427		0.49708	1.5912	0.54477	0.21742	0.90409	0.27083	0.40448		0.7892	0.2564	0.047787	0.10054	0.29475	0.46741
	69.53	220.33	84.27	131.02	39.08	44.438	51.205		393.23	58.898	111.69	84.387	40.719	20.593	56.86		79.631	79.631	184.61	56.86	96.8	46.58	289.66	88.9	125.94	34.734		0.48604	0.10432	0.67904	0.44016	0.12541	0.16735	0.11755		0.33381	0.64046	0.50099	0.13847	0.70688	0.26739	0.24135		0.47251	0.6592	1.2385	1.0725	0.56754	0.85201
	73.722	195.3	90.933	90.308	47.857	48	53.889		339.18	59.639	113.94	82.615	45.854	21.613	55.059		70.321	70.321	175.13	55.059	81.489	56.395	284.44	75.001	116.96	41.673		0.45892	0.38284	0.3341	1.2091	0.86704	0.36682	1.1482		0.44286	0.34612	0.65123	0.050646	0.51	0.13124	0.2408		1.9384	1.8089	1.7177	1.1432	1.8498	0.24303
	79.991	162.21	93.083	53.538	54.467	56.935	51.39		277.83	61.246	128.73	77.292	55.348	23.59	53.97		64.563	64.563	156.06	53.97	62.98	77.145	263.04	60.164	105.65	52.185		0.54854	0.3041	0.25921	0.6575	0.62413	0.94199	0.52544		0.24967	0.41616	0.70925	0.064334	0.72556	0.16568	0.66177		1.3106	0.18957	0.71457	0.64908	0.74871	0.24728
	87.005	129.42	88.64	28.382	59.941	68.754	45.94		218.67	63.048	152.43	69.685	66.053	25.827	53.229		62.365	62.365	134.78	53.229	45.809	102.03	233.18	47.008	94.764	63.437		0.47276	0.27178	0.32077	0.41091	1.1839	0.40802	0.14741		1.32	0.2212	0.26657	0.12807	0.80214	0.11512	0.3532		0.3976	0.95831	0.88976	0.61422	0.36808	0.25026
	93.437	105.3	79.192	16.756	65.929	80.969	39.193		171.17	64.372	181.4	61.06	74.824	27.628	52.475		63.731	63.731	118.68	52.475	34.511	124.25	202.58	38.152	87.024	72.591		1.774	0.092003	0.42046	0.39853	0.64275	0.021227	0.023599		0.14389	1.1921	3.1574	0.17475	0.56032	0.18186	0.079287		2.5898	0.54048	0.87156	0.24182	0.040299	0.25206
	97.956	88.308	67.855	13.549	74.079	96.74	32.802		144.81	64.546	212.01	52.682	78.514	28.296	51.347		68.668	68.668	115.17	51.347	30.156	136.99	178.95	36.214	85.165	76.813		1.4968	0.33663	0.16869	1.1163	0.54158	0.31489	0.33157		1.0792	1.1962	0.90709	0.020546	0.90885	0.21403	0.44567		1.0771	0.42518	0.28762	0.17854	0.028572	0.11165
	97.166	72.861	57.745	15.882	86.043	117.72	28.421		150.03	63.658	250.03	43.314	74.344	27.357	49.632		78.016	78.016	124.77	49.632	29.722	136.51	162.39	45.018	92.886	74.497		0.53036	0.39775	1.1461	0.18083	0.24674	0.068102	0.43836		0.8693	0.26146	0.48872	0.082093	0.32727	0.20717	0.12376		0.83053	0.18306	0.41124	0.27536	0.49739	0.040264
	91.954	61.282	51.979	20.88	106.88	139.18	25.445		180.49	62.154	297.89	32.112	64.411	25.275	47.573		91.773	91.773	142.56	47.573	31.601	127.35	147.75	62.818	108.36	67.533		0.3472	0.53508	0.8524	0.32337	0.32596	0.10034	0.28707		1.1198	0.10434	0.60335	0.096762	0.41912	0.3727	0.3537		0.38129	0.76002	0.30226	0.12004	1.0415	0.5352
	87.414	55.897	51.369	25.665	135.48	156.38	22.771		220.57	59.906	346.92	20.933	52.886	22.761	45.485		108.68	108.68	167.73	45.485	34.188	115.13	134.89	83.88	126.05	58.33		2.0827	1.6049	1.2718	0.56424	1.0944	0.15998	0.40384		0.55406	0.28574	1.228	0.060335	0.25935	0.53869	0.37914		0.77386	0.26469	0.67288	0.37674	1.1234	0.05433
	88.639	59.029	53.838	32.407	164.27	164.57	21.307		254.62	56.782	388.46	11.633	43.937	20.529	43.686		127.46	127.46	199.48	43.686	35.875	105.47	123.65	102.47	140.41	49.294		2.9503	0.54243	0.16962	0.55236	0.93871	0.076396	0.53853		1.3221	0.191	0.2742	0.22166	0.11821	0.57814	0.42267		1.1122	0.49299	0.7792	0.22914	0.90332	0.35895
	100.72	76.211	58.167	43.024	185.66	161.8	21.961		267.01	52.652	413.86	6.0685	41.734	19.29	42.492		146.86	146.86	236.99	42.492	36.733	104.01	113.87	112.84	145.88	42.835		1.3707	0.56276	0.025873	1.2145	0.34431	0.092234	0.62314		0.90915	0.66316	0.75357	0.10467	1.1209	0.39415	0.40519		3.0471	0.88603	0.2696	0.9788	0.91617	0.29437
	131.2	105.89	63.136	54.261	192.05	151.22	25.64		250.75	45.014	421.17	5.3143	50.313	18.858	42.161		171.4	171.4	293.63	42.161	37.832	114.23	105.22	113.4	137.55	38.215		0.9459	0.20067	0.21663	0.40262	0.17416	0.11618	0.23914		0.21582	0.67709	0.46838	0.40969	0.28713	0.14437	0.095822		1.3183	0.21682	0.3355	1.2513	0.50087	0.13264
	176.68	139.78	67.524	62.865	177.42	135.78	34.639		216.26	33.954	416.16	8.1327	66.892	18.758	42.483		201.9	201.9	369.93	42.483	39.068	132.38	97.814	107.94	119.11	33.828		0.63298	0.46105	0.54389	0.27064	1.0588	0.37759	0.88332		0.065307	1.0836	0.14394	0.12897	0.48625	0.099832	0.85221		1.1959	0.83941	0.52498	0.90101	0.83766	0.68932
	225.85	169.56	72.289	65.581	146.84	118.41	48.351		174.03	23.227	401.76	12.912	85.421	19.269	43.07		231.61	231.61	445.86	43.07	40.336	153.23	92.138	98.915	97.954	30.78		0.8606	0.31941	0.3653	0.71151	0.23924	0.049411	0.24159		0.47175	1.2124	1.4011	0.214	0.13888	0.19548	0.30854		0.26519	0.47262	0.97925	0.99783	0.56438	0.78421
	267.41	186.96	78.243	58.56	109.33	102.05	63.337		134.53	16.585	380.86	18.04	99.849	20.67	43.534		253.76	253.76	501.37	43.534	41.534	171.55	88.694	88.734	81.457	30.177		0.78586	0.69951	0.74798	0.2997	0.8638	0.063632	0.58154		0.5501	0.155	2.3564	0.12227	0.65979	0.23187	0.3046		1.915	0.7935	0.47741	1.1425	1.7138	0.53527
	290.07	188.73	83.953	43.97	73.938	84.565	76.157		108.25	17.782	356.38	21.905	104.13	23.242	43.489		261.59	261.59	516.41	43.489	43.022	182.11	87.982	79.826	77.004	33.124		0.18241	0.66546	0.40382	0.1941	1.0361	0.25715	0.45357		0.28213	0.44497	1.5063	0.18553	0.74848	0.2497	0.47614		0.44734	0.1085	1.3677	0.32211	0.33102	0.47127
	288.93	180.43	87.982	27.587	49.699	64.013	83.372		96.661	28.924	322.71	24.866	93.995	26.973	42.217		249.17	249.17	474.69	42.217	44.872	179.98	87.52	70.985	91.204	40.008		0.11309	0.40738	0.64573	0.28716	0.61553	0.22791	0.39738		0.43727	0.73607	0.76378	0.25256	0.37394	0.21296	0.67269		0.33645	0.21986	0.61764	0.77997	0.34234	0.11404
	271.54	166.87	88.895	15.186	38.758	43.568	82.799		92.777	47.51	277.91	27.998	73.487	31.679	39.978		221	221	389.58	39.978	46.538	168.63	86.975	60.594	119.13	50.094		0.30157	0.7334	1.3269	1.0165	0.40339	0.35661	0.28844		0.25511	0.86019	0.85806	0.090859	0.33825	0.16697	0.47237		0.94005	0.50502	1.3928	0.61644	0.26864	0.73356
	245.22	152.89	83.925	12.542	35.09	26.409	76.73		94.383	70.378	230.4	30.762	48.991	37.373	37.845		185.99	185.99	285.51	37.845	47.477	155.48	90.07	50.463	150.88	62.798		0.41825	0.85968	1.7202	1.028	0.17909	0.36915	0.40904		0.30119	0.17532	0.57262	0.050388	1.0401	0.15485	1.64		0.72421	0.27172	0.93721	0.54258	0.40218	0.28524
	217.27	143.32	74.027	22.624	35.477	15.713	68.441		99.264	94.368	188.57	32.62	26.894	44.069	36.894		153.03	153.03	186.91	36.894	47.144	147.93	100.53	42.399	176.54	77.539		0.55595	0.079662	0.16052	0.37338	0.032936	0.079871	0.61739		1.7947	0.37191	0.98337	0.26466	0.11132	0.45924	0.18466		1.4426	0.29606	2.4137	0.33952	0.60424	0.66581
	195.02	138.67	63.354	41.582	36.701	13.915	61.205		105.2	116.32	160.86	33.033	13.584	51.778	38.198		131.02	131.02	118.21	38.198	44.853	153.39	122.07	38.212	186.19	93.736		0.3569	0.25109	0.69117	1.2587	0.084125	0.14725	0.9927		0.88618	0.24921	1.6864	0.10468	0.59636	0.31391	0.17907		3.2299	0.23301	0.66432	0.27722	0.51432	0.32571
	175.29	135.74	56.061	64.963	35.543	18.897	58.297		109.21	138.74	148.72	31.216	11.065	63.158	42.143		121.21	121.21	83.057	42.143	40.969	179.57	163.55	39.912	174.84	116.16		0.43878	0.37865	0.88216	0.074982	0.50986	0.095109	0.41227		0.93933	0.053825	2.7489	0.018799	0.12081	0.59849	0.010984		2.0054	0.70198	1.6373	0.70608	0.28307	0.3468
	110.99	115.43	47.092	180.38	26.547	183.26	109.27		267.78	52.487	302.12	57.068	116.54	25.96	73.316		181.07	181.07	69.011	73.316	51.506	83.607	157.65	141.81	183.46	40.904		1.5002	0.56406	0.35674	1.3611	0.41088	0.033351	0.41816		1.1643	0.35134	1.5207	0.049296	0.37434	0.64549	0.022791		0.20848	0.4293	1.1108	0.77458	0.90258	0.20178
	99.093	111.95	45.219	187.95	14.634	189.59	92.23		395.2	56.082	302.82	50.84	96.619	25.543	75.369		200.23	200.23	93.432	75.369	57.26	96.205	142.27	149.04	168.58	36.879		0.62256	0.60926	0.28848	0.13329	0.71583	0.079028	0.66206		2.2326	0.70965	0.73865	0.15018	0.44659	0.52307	0.072063		2.7331	0.27748	0.13407	0.82702	1.1077	0.38579
	87.154	112.07	45.622	195.56	7.5915	186.12	72.211		504.69	60.325	298.8	46.185	77.933	25.065	76.544		214.9	214.9	117.1	76.544	62.647	106.22	131.82	152.87	153.95	33.601		0.42602	0.34256	0.58513	0.090449	0.42709	0.1959	0.10398		1.0303	1.7758	0.13052	0.14028	0.19337	0.31476	0.35322		0.74453	0.41661	0.70795	0.8076	1.2553	0.18775
	78.961	119.31	47.794	203.57	3.7808	167.19	54.127		567.03	62.251	287.33	44.96	63.495	24.622	76.218		217.17	217.17	133.76	76.218	68.851	109.57	132.57	151.69	143.65	31.15		0.37555	0.30405	0.79789	0.18926	0.27623	0.5052	0.63973		0.43572	1.1238	1.4284	0.033424	0.59441	0.15963	0.40519		0.52943	0.39806	0.28149	0.71457	1.0121	0.16925
	74.419	133.35	51.231	208.63	1.5651	135.41	42.888		571.05	61.572	262.3	49	53.054	24.112	73.767		202.88	202.88	142.76	73.767	76.251	102.3	150.9	143.61	138.77	29.088		0.66178	0.26935	0.012671	0.48768	0.077897	0.9127	1.2343		0.17906	0.22206	1.2773	0.08474	0.92161	0.1832	0.039008		0.12153	0.56499	0.09223	0.65565	1.0875	0.11751
	71.005	148.88	55.426	207.41	1.4927	99.252	40.515		536.21	60.266	225.51	57.068	44.601	23.47	69.606		177.29	177.29	148.27	69.606	83.07	87.126	182.67	129.7	136.62	27.359		0.83405	0.69491	0.88945	1.3795	0.31	0.21349	0.33955		0.34944	0.30051	0.32055	0.068742	0.857	0.21483	0.24057		1.5415	0.6582	0.68204	0.47782	1.487	0.17278
	68.861	160.63	62.137	196.54	4.6552	67.204	43.734		479.28	58.764	186.14	66.411	38.514	22.85	64.671		146.65	146.65	151.27	64.671	87.527	69.989	218.26	112.8	135.52	26.624		0.64282	0.091471	0.5263	0.12745	0.10444	0.3544	0.88555		0.56374	0.62895	0.10536	0.19294	0.20995	0.24119	0.46821		0.44016	0.47412	2.1848	0.40245	0.87402	0.077001
	68.128	163.3	71.702	170.15	10.23	47.753	49.513		417.06	57.494	153.38	74.275	35.17	22.407	59.9		117.21	117.21	152.73	59.9	87.845	56.812	248.04	95.758	133.79	27.542		2.1666	0.25439	0.77822	0.43301	0.39189	0.14003	0.16539		0.3654	0.30838	1.1249	0.095339	0.34345	0.31377	0.41009		0.97543	0.46937	1.5526	1.0088	0.31595	0.095227
	68.95	153.97	81.483	130.47	17.394	43.045	54.823		366.33	56.887	136.41	77.907	34.945	22.297	56.229		95.2	95.2	153.62	56.229	82.144	53.526	262.4	81.41	129.77	30.773		1.0747	0.30461	0.7894	1.8613	0.094886	0.2728	0.13423		0.80935	0.40897	0.57792	0.041414	0.31536	0.24109	0.23969		0.32632	0.46869	0.058723	1.3436	0.18165	0.84527
	71.57	136.17	88.843	86.321	25.325	47.421	56.631		321.91	57.214	137.66	76.584	40.346	22.766	53.799		79.904	79.904	151.8	53.799	71.611	64.515	256.72	67.864	121.2	38.339		0.078477	0.70075	0.98419	0.89397	0.13189	0.30733	0.7611		0.96094	0.56644	0.98795	0.39772	0.66594	0.10686	0.10271		0.8995	0.79996	0.49371	1.1344	0.25148	0.91201
	75.893	114.29	91.145	46.528	33.049	57.665	54.13		272.64	58.19	151	72.139	51.121	23.712	51.985		67.156	67.156	146.61	51.985	59.063	85.827	237.41	53.227	109.2	49.8		0.76664	0.72764	0.7184	1.3193	0.21917	0.20834	0.26138		0.80886	0.52737	1.0436	0.12028	0.61003	0.11103	0.25763		1.0062	0.47109	1.5359	0.46277	1.6577	0.63349
	81.554	92.689	85.938	19.912	41.115	70.561	49.341		226.24	59.405	172.79	65.661	63.511	24.764	50.577		58.046	58.046	141.29	50.577	47.318	110.88	211.41	40.338	97.143	62.123		1.4839	0.62638	1.7139	0.60675	0.23492	0.26865	0.27828		0.25242	0.98404	0.62042	0.20845	0.31886	0.094356	0.49318		0.45276	0.44401	0.97078	0.51943	2.0152	0.37614
	88.185	75.764	74.982	8.5903	50.983	82.891	43.475		190.44	60.452	199.4	58.236	73.757	25.55	49.363		53.663	53.663	139.07	49.363	39.192	133.11	185.63	32.035	88.393	72.274		0.3733	0.23006	0.28178	0.4719	0.27882	0.18192	0.40226		0.61476	0.52609	0.7717	0.35706	0.18081	0.17021	0.34027		0.31868	0.086053	0.28148	0.71279	1.9803	0.22683
	95.418	61.848	61.95	6.6815	64.114	97.362	37.743		172.99	60.923	227.16	50.954	78.1	25.702	48.133		55.098	55.098	143.17	48.133	35.309	145.91	167.02	31.156	86.318	77.221		0.4379	0.12723	1.0552	2.0312	0.10028	0.26106	0.49604		0.71442	0.34403	0.18567	0.18965	0.46865	0.59709	0.42106		0.64158	0.462	0.1151	0.52393	0.72965	0.37904
	103.34	48.021	50.516	11.009	81.969	116.12	33.356		184.33	61.175	261.54	42.69	73.424	24.961	46.883		63.642	63.642	152.55	46.883	33.793	145.44	156.68	41.892	94.6	75.339		2.0191	0.4284	0.65881	1.4131	0.63936	0.066319	0.88651		2.2632	0.29393	0.5172	0.034807	0.1732	0.91531	0.23163		0.7818	0.73378	0.97748	0.19076	0.14603	0.13551
	112.2	36.777	44.352	18.396	111.42	135.1	29.287		219.31	61.479	304.97	32.718	62.234	23.574	45.752		78.569	78.569	165.03	45.752	33.705	136.07	150.01	62.352	110.99	68.651		1.4013	0.94471	0.93706	0.21548	1.0042	0.040987	0.57379		1.5498	0.093863	0.086522	0.12833	0.23838	0.39303	0.40506		0.48657	0.15841	0.91051	0.70587	0.46043	0.38942
	121.86	30.61	44.796	25.666	151.5	150.25	24.727		262.25	61.3	349.26	22.725	49.206	21.928	44.747		97.941	97.941	182.22	44.747	34.11	123.61	145.31	86.248	129.97	59.592		0.29216	1.2073	0.42116	0.54294	0.12399	0.18561	0.30368		0.50446	0.25654	1.2078	0.13475	0.58282	0.69696	0.31447		2.0362	0.33613	2.1442	0.97799	1.398	0.48744
	132.2	32.015	49.398	35.451	191.9	157.51	21.219		297.45	60.103	386.24	14.397	39.013	20.409	43.875		119.82	119.82	205.72	43.875	34.072	113.85	140.93	107.29	146.03	50.6		0.86337	0.27309	0.72067	0.43058	0.23463	0.23481	0.50191		0.8582	0.64338	0.33262	0.10082	0.31243	0.60746	0.17119		0.8959	1.2589	1.9923	1.0346	1.0762	0.5093
	143.08	45.041	56.154	49.87	222.29	155.31	20.305		309.24	57.353	407.72	9.4194	36.332	19.404	43.143		142.27	142.27	237.13	43.143	33.574	112.6	135.17	119.2	153.63	44.111		0.32956	0.92027	0.29455	1.3566	0.88841	0.6178	0.18642		0.39405	0.8192	0.72457	0.13672	0.14784	0.25485	0.24182		0.30689	0.087537	0.40624	0.86917	2.8371	0.37504
	155.24	68.026	63.06	64.973	232.36	146.36	23.527		289.85	50.628	411.2	8.7545	45.24	18.576	42.662		169.78	169.78	289.08	42.662	33.241	123.71	126.53	120.24	148.81	39.432		0.55535	1.6946	0.53442	0.88246	0.35699	0.058981	0.291		0.20539	2.3289	1.8002	0.12049	0.078753	0.22441	0.1474		0.83386	0.32826	0.27675	0.4865	0.92729	0.25231
	168.79	94.894	68.115	76.812	214.19	133.01	33.725		249.73	40.285	402.13	11.278	62.622	17.667	42.429		203.65	203.65	360.51	42.429	33.096	143.33	116.12	114.58	135.23	34.938		1.5657	0.73732	1.0208	0.71692	2.062	0.28092	0.27147		0.76375	2.2831	0.40766	0.059146	0.18669	0.049256	0.10838		0.39241	0.52928	0.20029	0.61179	0.5489	0.37236
	182.59	119.57	71.55	81.438	174.65	117.59	49.872		200.54	29.956	384.28	15.547	82.358	17.183	42.274		237.14	237.14	432.46	42.274	33.165	165.66	106.22	104.85	118.87	31.669		0.76752	0.48478	0.28946	0.36043	0.566	0.35514	0.24178		0.70755	0.70317	0.49908	0.10589	0.214	0.14054	0.38459		0.29101	1.198	0.66953	0.22732	1.1394	0.40724
	195.53	135.99	74.701	74.69	125.64	102.46	67.706		153.92	23.273	361.37	20.12	98.332	17.629	42.028		263.48	263.48	485.97	42.028	33.472	184.88	99.098	93.658	105.71	30.665		0.31692	1.0619	0.13792	0.13374	0.81376	0.24163	0.086839		0.24967	0.63946	0.84212	0.25444	0.15923	0.16478	0.61362		2.3582	1.6552	1.3112	0.308	0.22251	0.23693
	206.47	142.26	77.219	59.202	79.027	85.393	82.966		121.54	23.868	337.16	23.552	104.42	19.512	41.523		275.94	275.94	502.07	41.523	34.202	195.22	97.036	83.62	101.72	32.965		0.99395	1.0358	0.31107	0.30601	0.08899	0.58283	0.30721		1.3912	0.39975	0.86339	0.55531	0.55076	0.30535	0.5703		1.0717	0.6393	0.33265	0.30642	0.88494	0.22054
	217.54	142.44	78.753	41.213	46.695	64.822	91.391		104.59	33.564	307.21	26.214	96.748	22.928	39.848		269.7	269.7	466.73	39.848	35.339	191.68	97.302	73.168	111.86	38.805		0.32563	1.0856	0.53858	1.6193	0.62133	0.1689	0.11052		1.1924	0.94918	0.069961	0.073589	0.13989	0.15592	0.16702		1.4352	0.35229	0.40987	0.48584	0.44757	0.27168
	229.5	139.34	78.952	26.964	30.744	44.081	90.412		95.304	49.942	269.03	29.068	79.382	27.539	37.117		249.26	249.26	392.6	37.117	36.605	178.15	98.378	60.56	132.17	47.492		0.2208	0.9751	1.0064	0.64158	0.18831	0.093554	0.21503		1.4857	0.76567	1.0339	0.40287	0.41155	0.023297	0.54103		2.523	0.39415	0.96917	0.59351	1.2066	0.27405
	239.15	135.79	76.053	22.695	23.254	26.504	82.869		91.88	70.264	229.27	31.56	58.157	33.201	34.694		221.83	221.83	300.72	34.694	37.723	162.07	104.36	48.146	155.18	58.672		0.20544	0.70288	0.34201	0.99634	0.21626	0.44592	0.3836		2.2335	0.49807	1.0062	0.3279	0.94655	0.080591	1.1586		0.57201	0.15519	0.42013	0.43095	0.23335	0.21902
	243.3	134.62	70.288	31.456	21.075	15.422	72.617		92.516	91.792	194.57	33.133	38.904	39.77	33.941		194.65	194.65	212.13	33.941	38.415	150.91	119.35	38.276	173.42	71.99		1.2124	0.91428	0.91733	1.5075	0.9773	0.14666	0.19952		1.0892	0.41204	0.61159	0.75978	0.21527	0.21641	0.66863		0.10621	0.55863	1.0261	0.37318	1.5622	0.19908
	238.78	137.06	64.304	49.085	21.057	13.121	63.511		95.408	111.79	171.58	33.233	27.454	47.102	36.222		174.92	174.92	147.87	36.222	38.643	152.1	147.44	33.303	179.43	87.092		1.0873	0.56353	0.37297	0.18374	0.32337	0.30443	0.082622		1.1554	0.20318	1.0839	0.28703	0.45255	0.2162	0.23		0.36058	0.14048	0.54005	0.6128	0.93724	0.33386
	219.59	141.24	60.748	71.011	20.05	17.378	59.404		98.133	132.71	161.99	30.914	25.6	57.531	42.864		162.36	162.36	108.98	42.864	38.592	172.43	200.36	35.627	169.5	108.49		1.5029	0.42018	0.77884	0.33681	0.25898	0.76799	0.6194		0.042737	0.30919	0.41593	0.10432	0.18812	0.19854	0.44582		1.0155	0.54626	0.96795	0.73635	0.41245	0.25861
	187.85	145.28	62.265	92.659	17.802	24.768	62.699		101.89	156.39	161.37	26.546	29.456	71.154	52.956		152.15	152.15	81.428	52.956	38.319	206.92	275.39	43.682	148.59	136.42		0.78295	1.0064	0.449	0.27778	0.1776	0.10959	1.5716		0.26297	0.41948	0.81507	0.19184	0.53406	0.20286	0.21183		0.66986	0.070064	0.41654	1.2414	1.2972	0.37706
	152.56	147.35	71.373	109.46	16.414	31.862	70.828		110.32	179.13	167.18	21.548	36.33	84.468	64.511		144.73	144.73	63.663	64.511	37.881	245.41	354.92	53.865	122.28	164.11		1.4663	0.3671	0.26241	0.62789	0.081463	0.093656	1.0935		0.36262	0.088217	0.35292	0.13904	0.22412	0.62224	0.32066		2.0027	0.54265	0.62398	1.4258	0.34706	0.64562
	122.68	145.57	86.308	121.86	16.263	35.236	80.185		127.06	197.25	176.88	17.34	43.531	93.974	75.538		140.54	140.54	54.125	75.538	37.337	277.78	421.36	62.57	96.178	184.8		3.1018	0.59227	0.452	0.50713	0.30311	0.070523	0.61569		0.57477	0.42403	0.48137	0.29147	0.33458	0.65218	0.31764		1.0875	0.48163	1.411	0.078245	1.4577	0.78565
	107.19	137.48	103.29	132.91	17.725	33.91	87.167		155.74	207.06	187.92	15.34	48.369	96.172	84.049		140.03	140.03	51.256	84.049	36.507	293.85	457.09	66.193	75.852	191.72		0.84518	0.50531	0.48938	0.72703	0.33611	0.15314	0.68334		0.88798	1.0062	0.18761	0.16181	0.35561	0.38642	0.35026		0.27801	1.3009	1.0945	0.15437	2.7331	0.18194
	111.82	124.3	118.55	141.93	21.177	30.169	88.17		207.5	207.4	202.57	16.018	51.233	87.811	90.436		146.53	146.53	59.574	90.436	35.351	285.25	454.22	61.841	59.864	179.6		0.59921	0.42759	0.39244	0.34414	0.26392	0.10409	0.19194		0.5223	0.1877	1.3233	0.19896	0.29411	0.32249	0.42122		0.46607	0.27579	0.27535	0.50896	0.49123	0.31029
	89.159	171.91	77.634	111.36	154.8	118.57	103.09		91.405	86.679	318.91	61.504	146.75	23.43	55.679		165.18	165.18	74.291	55.679	26.929	106.64	175.36	104.64	161.64	65.369		0.98479	0.2988	0.79996	0.47331	0.41182	0.18055	0.66709		0.607	0.5208	0.51974	0.2261	0.37342	0.2263	0.45884		0.6949	0.3449	0.39845	0.71756	0.54649	0.16971
	116.64	151.52	68.421	120.62	116.63	129.21	114.7		92.88	65.72	329.06	58.861	140.63	25.358	59.52		158.91	158.91	54.149	59.52	28.859	110.19	173.33	113.66	182.41	59.282		0.53497	0.506	0.85285	0.1225	0.74507	0.40181	0.50847		0.58691	0.64985	0.30515	0.10118	0.7961	0.2419	0.115		0.41824	0.65123	0.26899	0.73711	1.032	0.36631
	132.28	142.8	61.027	129.86	81.35	141.26	122.55		114.19	52.139	335.08	55.978	132.98	26.501	62.821		160.33	160.33	45.715	62.821	34.74	110.53	170.96	120.72	192.88	53.865		0.79796	0.26482	0.081163	0.14713	0.19155	0.71197	0.13337		1.9706	0.88513	0.4221	0.20033	1.1262	0.23059	0.27726		0.79522	0.11156	0.39445	0.37432	0.70228	0.90198
	133.12	140.44	55.223	139.02	53.956	155.03	124		168.78	47.974	337.41	52.043	122.62	26.602	65.974		176.25	176.25	53.667	65.974	44.333	107.69	166.2	126.64	189.76	48.64		0.88661	0.2183	0.49185	0.53698	0.58508	0.070099	0.81694		0.80771	0.83572	0.38415	0.026446	0.14392	0.033684	0.1449		0.26032	0.24946	0.90786	0.89175	0.57027	0.62519
	124.64	141.28	50.78	148.03	35.206	167.15	115.91		250.96	50.177	336.88	46.998	109.28	25.993	69.343		205.49	205.49	73.61	69.343	55.286	104.67	158.02	132.22	177.47	42.713		0.59747	0.10626	0.49028	0.21852	1.0883	0.35353	0.24112		2.1469	0.12911	0.452	0.11674	0.7117	0.083614	0.27081		0.13739	0.6826	0.21512	0.48224	0.29208	0.19057
	111.3	142.13	47.614	156.84	21.776	174.24	100.07		340.57	55.691	332.82	42.057	94.723	25.062	72.343		237.85	237.85	98.529	72.343	65.248	101.44	149.49	136.22	160.97	36.797		0.61847	0.50588	0.21429	0.37175	0.83521	0.42163	0.4565		0.8779	0.38717	0.61722	0.58533	0.12856	0.19222	0.58724		2.5926	0.09898	0.80139	0.22141	0.066928	0.3845
	97.553	139.82	45.876	168.8	12.523	172.91	81.147		417.44	61.455	324.53	38.435	80.711	24.193	74.39		263.17	263.17	121.41	74.39	71.87	97.965	143.7	137.42	145.17	31.609		0.39121	0.17538	0.17603	1.1459	0.75131	0.17548	0.16018		1.1146	0.68465	0.28947	0.42087	0.93918	0.20917	1.0537		0.64256	0.22673	0.46481	0.16454	0.3401	0.12781
	87.846	134.1	45.695	183.95	6.3051	158.37	63.827		461.43	64.413	311.33	37.349	69.011	23.773	74.896		271.25	271.25	135.24	74.896	74.751	94.194	143.74	134.59	135.03	27.864		0.47763	1.2976	0.42351	0.63212	0.24704	0.33828	0.95192		0.52069	0.97739	0.65329	0.25085	0.6082	0.19658	0.42018		1.4194	0.085935	0.33122	0.76888	0.5108	0.30042
	81.928	127.07	47.2	197.26	1.9799	132.88	52.788		464.37	64.223	288.17	40.096	58.802	23.969	73.364		256.91	256.91	136.87	73.364	75.459	88.365	153.22	126.06	132.27	25.168		0.31382	1.4996	0.6877	0.62199	0.1952	0.43118	0.76276		1.4531	0.63771	2.6439	0.22381	0.14291	0.19599	0.18392		0.80555	0.58728	1.4937	0.99498	2.253	0.36969
	76.831	119.14	50.519	203.71	-0.21207	103.62	49.777		439.72	62.924	255.52	45.866	48.908	24.525	70.184		226.92	226.92	130.99	70.184	74.592	80.502	170.08	112.65	133.6	23.045		1.0671	0.58441	0.75122	0.12736	0.79306	0.62972	0.46385		0.49647	0.76692	1.1445	0.23786	0.37432	0.25557	0.10542		1.5598	0.17899	1.0149	0.29746	1.284	0.53865
	72.936	110.68	57.825	198.27	0.49061	77.789	51.675		399.69	61.028	220.94	52.712	40.559	25.188	66.104		189.09	189.09	122.3	66.104	72.751	73.259	188.91	96.865	136.43	22.084		0.75612	0.59438	1.3509	0.32317	0.37703	0.12917	0.25745		0.47031	0.36665	1.3377	0.20566	0.28456	0.19998	0.074938		0.10897	1.2993	1.4371	1.0674	0.29979	0.17485
	70.619	102.09	69.032	174.73	3.7273	62.577	55.859		356.5	59.046	191.99	58.684	34.984	25.706	61.872		151.21	151.21	115.52	61.872	70.534	69.285	204.27	81.194	138.15	22.876		0.27087	0.57936	0.59782	0.37295	0.13522	0.41175	0.033281		0.39871	0.22902	1.2615	0.078117	0.2072	0.15344	0.15854		0.65625	1.4028	0.9239	0.4108	0.59134	0.72902
	70.26	93.063	80.881	136.43	9.1376	60.217	59.71		322.37	57.49	176.25	61.834	33.413	25.828	58.236		121.08	121.08	115.36	58.236	67.583	71.231	210.74	68.138	136.14	26.009		0.18247	0.34137	0.52919	0.14241	0.057555	0.16181	0.20593		0.68318	0.5573	2.0295	0.32298	0.5607	0.23179	0.26835		1.7423	1.5398	1.022	0.54649	0.34937	0.3948
	71.563	83.349	90.113	92.709	16.361	65.915	60.605		293.39	56.117	175.94	61.871	38.528	25.434	55.02		96.396	96.396	123.64	55.02	63.499	82.517	204.94	55.84	127.61	33.465		0.15308	1.0807	0.50255	1.7999	0.88587	0.43059	0.23295		1.0118	0.20096	1.2075	0.16401	0.10474	0.19376	0.39252		1.9568	0.54578	0.72636	0.39572	0.36652	0.4445
	74.275	73.391	93.47	52.865	24.525	76.321	57.9		261.4	54.587	186.01	60.094	49.508	24.69	51.725		71.965	71.965	137.23	51.725	58.818	101.38	190.48	42.634	114.28	44.849		1.079	0.40149	0.056205	2.6354	0.56901	0.31473	0.3564		0.034006	0.23487	1.8767	0.14033	0.20618	0.32029	0.74374		0.64442	0.95022	0.43872	0.5575	1.255	0.52455
	78.84	63.636	88.232	26.215	33.869	88.084	53.343		232.28	53.263	203.13	56.94	62.331	23.778	48.616		51.233	51.233	153.38	48.616	54.081	122.68	172.44	31.307	100.38	57.192		1.1292	0.072021	0.37878	0.66672	0.12172	0.13859	0.14224		1.528	0.20072	0.57697	0.18029	0.24928	0.21753	0.31968		0.52027	0.36146	1.6915	0.7908	1.227	0.50593
	85.704	54.53	76.571	14.383	45.704	97.854	47.9		211.93	52.509	223.97	52.846	72.978	22.879	45.955		37.65	37.65	169.35	45.955	49.825	141.29	155.9	24.646	90.112	67.524		0.77817	0.18784	0.32605	0.45591	0.14053	0.39762	0.14676		0.76344	0.53334	0.53494	0.079276	0.38534	0.37062	0.19944		0.020885	0.33892	0.66993	0.91245	0.34676	0.37466
	95.311	44.404	62.567	11.161	61.336	107.07	42.538		206.22	52.69	245.23	48.249	77.425	22.176	44.005		34.663	34.663	182.42	44.005	45.944	152.09	145.92	25.437	87.699	72.875		0.92255	0.12525	0.31168	0.64148	0.34703	0.067743	0.50626		3.1963	0.51104	0.55861	0.24337	0.32336	0.31174	0.53877		0.66281	0.89173	0.63361	0.46592	0.45584	0.20524
	110.87	32.96	50.3	14.112	82.074	117.98	38.224		225.1	54.799	271.4	42.127	72.535	21.766	43.035		45.227	45.227	189.11	43.035	42.077	151.58	144.93	38.1	96.893	71.802		0.16286	1.0347	0.29567	0.78908	0.5658	0.028438	0.31548		2.8167	1.8112	2.8555	0.23895	0.1675	0.54794	0.86017		0.26891	0.21309	0.49435	0.12109	0.30106	0.40861
	132.09	22.703	43.852	20.8	115.73	128.4	33.809		264.62	58.59	304.72	34.189	60.989	21.53	42.867		67.04	67.04	191.26	42.867	38.387	143.17	149.56	60.777	114.88	66.285		0.16812	0.21019	0.35459	0.26128	0.4023	0.31606	0.11449		1.9089	1.4382	2.2378	0.26171	0.48634	0.19901	0.64628		1.3371	0.67486	0.60568	0.77117	1.0425	0.040331
	154.15	16.134	44.875	28.79	161.42	136.18	28.649		309.91	62.578	338.4	25.968	47.494	21.318	43.102		95.675	95.675	194.05	43.102	35.034	132.11	156.15	86.839	136.04	58.488		1.0394	0.12772	0.29719	0.61913	0.56663	0.50852	0.63916		1.5462	1.416	0.9365	0.27819	0.33728	0.15263	0.32955		1.0822	0.39845	0.69099	0.66021	0.26089	0.11399
	172.24	15.758	50.647	41.512	207.44	139.14	24.466		346.05	65.275	365.66	18.996	36.759	20.98	43.339		126.7	126.7	202.68	43.339	32.18	123.66	161.09	109.66	154.73	50.579		0.28217	0.48947	0.74175	1.291	0.57597	0.17965	0.28238		2.7984	0.34004	0.27935	0.48051	0.72493	0.26385	0.27849		0.4312	0.11215	1.2884	0.75299	2.5201	0.25569
	181.53	23.982	58.691	60.59	242.08	136.44	22.982		358.16	65.191	379.72	14.804	33.493	20.369	43.18		155.7	155.7	222.35	43.18	29.816	123.07	160.73	122.61	165.33	44.722		0.56862	0.83445	1.9521	0.68841	0.26042	0.28124	0.54642		0.31055	0.27183	0.30248	0.37901	0.63325	0.075157	0.14561		0.32226	0.34974	0.79818	0.20165	0.746	0.30731
	176.62	39.137	66.529	80.879	253.64	129.53	25.921		338.27	60.041	377.61	14.139	41.185	18.811	42.596		186.31	186.31	263.74	42.596	27.837	134.09	151.51	123.75	165.17	40.249		0.48283	0.39843	1.3577	0.52756	0.69536	0.64914	0.36951		0.46404	0.61656	0.21146	0.018953	0.19424	0.016494	0.3281		0.29558	0.89984	0.54046	0.94867	0.73829	0.902
	160.71	57.612	71.683	97.233	233.05	119.67	36.244		296.29	50.817	363.87	15.978	56.696	16.408	41.854		221.48	221.48	323.39	41.854	26.252	153.23	135.85	117.52	157.99	35.715		0.52812	0.13976	0.26416	0.59826	0.41445	0.11746	0.76968		1.5239	1.1027	0.58126	0.17052	0.5359	0.01498	0.68726		1.0106	0.6473	0.17525	0.55555	0.11274	0.1954
	141.93	75.796	73.872	104.51	188.14	108.14	52.802		244.2	40.948	342.92	19.204	74.792	14.165	40.995		255.74	255.74	385.27	40.995	25.073	174.84	119.1	106.8	147.81	32.125		0.44824	0.71272	0.18095	1.0284	0.31878	0.29692	0.29823		0.78653	0.98048	0.39923	0.20711	0.13284	0.096393	0.031493		0.33988	0.12051	0.776	0.22565	0.11641	0.28518
	128.4	90.078	74.75	98.313	132.47	96.204	71.153		193.95	33.864	319.22	22.701	90.238	13.09	40.061		283.64	283.64	433.34	40.061	24.311	193.29	106.62	94.481	138.65	30.483		0.24189	2.0335	0.19481	0.40917	0.29984	0.10281	0.16648		0.506	1.314	0.22066	0.50221	0.37442	0.11478	0.2588		1.6584	0.38274	0.082915	0.46318	0.14162	0.23671
	128.24	99.92	74.736	82.079	79.604	82.018	86.854		157.52	32.995	297.2	25.35	97.8	14.189	39.093		299.69	299.69	451.56	39.093	23.821	202.93	103.77	83.46	134.51	31.792		0.54778	0.38664	0.92203	0.21414	0.083274	0.20052	0.05525		0.71855	1.303	0.59502	0.2535	0.066365	0.38632	0.1175		0.87949	1.2469	0.45798	0.27533	0.30682	0.21135
	149.83	107.73	74.246	62.391	43.108	64.732	95.462		135.23	39.628	274.11	27.554	94.726	18.054	36.868		300.94	300.94	430.64	36.868	23.593	199.61	108.23	71.969	137.87	36.231		0.6998	0.90129	0.40988	1.1111	0.19254	0.092956	0.04279		0.42317	1.2664	1.8304	0.065929	0.12507	0.3518	0.14417		0.57832	0.88482	1.7859	0.56276	0.71385	0.5873
	187.77	114.31	73.7	45.832	25.136	47.121	94.331		119.13	51.475	246.99	30.057	84.507	24.012	33.358		291.02	291.02	381.27	33.358	23.849	187.1	116.45	58.079	146.05	43.13		1.8943	0.34856	0.3672	0.34697	0.83762	0.12175	0.11937		1.6729	0.9605	0.93966	0.17018	0.53456	0.16567	0.16104		0.29853	0.28518	1.4807	0.46924	0.3116	0.72446
	229.47	120.48	72.055	38.986	16.642	31.957	86.422		108.69	66.607	219.98	32.258	71.269	31.179	30.398		274.4	274.4	317.39	30.398	24.807	171.61	131.88	44.441	155.35	52.223		2.2267	1.4777	0.61821	0.79981	0.18416	0.07797	0.40151		0.11113	2.6809	0.079972	0.13967	0.54759	0.23004	0.51227		1.69	0.39818	1.0011	0.52368	1.0798	0.53479
	262.36	127.03	69.034	44.659	14.4	22.011	75.705		103.38	83.095	197.2	33.554	59.137	38.669	29.824		255.53	255.53	252.95	29.824	26.686	159.35	157.98	33.705	162.05	63.242		0.44544	0.89828	0.13057	0.33398	0.18282	0.13258	0.10142		0.11937	2.2616	0.30618	0.072886	0.46847	0.10136	0.43806		2.4613	1.3087	1.4605	0.43648	0.5783	0.2508
	273.86	135.82	66.197	58.461	15.179	18.899	66.15		102.71	99.008	182.81	33.344	52.238	45.597	33.472		238.86	238.86	201.9	33.472	30.426	156.54	198.2	28.52	162.43	75.92		0.90288	0.77073	0.33334	0.17093	0.80727	0.25664	0.25329		0.55297	0.54858	1.0994	0.099571	0.24708	0.35049	0.45393		1.1907	0.52578	1.274	0.50101	0.3958	0.6415
	255.58	146.32	65.109	76.185	15.75	20.77	61.726		106.01	116.66	178.89	30.467	51.775	53.329	43.8		221.95	221.95	161.39	43.8	35.879	168.18	268.14	31.56	154.49	93.765		0.27317	0.38648	0.48814	0.68759	1.2327	0.026718	0.28769		1.5261	0.43141	0.71831	0.31252	0.52783	0.046806	0.23505		1.055	0.62273	1.2139	0.47514	0.55262	0.32772
	215.9	155.74	67.331	93.622	16.648	25.205	64.983		113.65	137.35	182.68	25.325	54.996	62.454	59.585		201.81	201.81	122.13	59.585	41.639	190.14	365.48	41.059	140.7	116.95		0.87406	0.5251	0.36713	1.1107	0.031893	1.0294	0.15319		1.3717	0.18939	0.6009	0.66842	0.099323	0.43542	0.25038		1.4393	0.29633	0.99194	0.41719	0.42703	0.64839
	167.42	161.3	74.427	106.57	20.027	29.786	73.275		126.57	157.58	191.05	19.658	60.099	70.926	77.139		182.14	182.14	88.375	77.139	46.296	214.89	466.86	53.005	124.07	140.23		0.97972	0.39804	0.37653	0.21884	1.448	0.17621	0.22144		1.9478	0.27006	2.2327	1.1452	0.10452	0.33502	0.24942		0.64871	0.096704	0.27691	0.49154	1.0585	0.47864
	122.7	160.23	85.356	114.72	25.084	32.09	82.777		145.75	173.9	200.84	15.209	65.279	76.695	92.769		166.63	166.63	64.405	92.769	48.443	234.94	548.88	63.39	107.62	158.32		0.64508	0.66955	0.29228	0.59888	0.15657	0.16498	0.15608		0.53354	0.41994	0.23645	0.51003	0.30331	0.12878	0.43554		0.22206	0.1052	0.19988	0.62485	0.30438	0.46128
	94.338	148.03	97.772	120.88	31.015	31.722	89.666		172.16	182.82	208.93	13.719	68.734	77.715	102.79		158.95	158.95	54.483	102.79	46.848	242.76	588.18	68.204	94.339	165.97		0.47086	0.48055	0.61938	0.35203	0.11704	0.42032	0.16839		0.91441	0.18028	1.6959	0.075956	0.24677	0.28595	0.71097		0.38842	0.3136	0.37519	0.46084	0.8531	0.37281
	85.896	126.55	109.33	125.51	37.016	30.294	90.119		214.94	183.22	213.29	16.124	70.985	71.868	106.23		162.79	162.79	65.249	106.23	42.449	231.03	571.75	64.434	83.457	159.77		0.41899	0.10293	0.71961	0.29639	0.46983	0.14967	0.30789		1.101	0.58125	2.4672	0.13741	1.0962	0.30314	1.8053		0.25414	0.13517	0.50297	0.3047	0.72003	0.3755
	51.298	90.309	61.227	33.118	131.65	164.59	25.094		213.04	56.335	362.64	10.902	53.919	21.838	42.021		162.98	162.98	177.31	42.021	37.477	98.936	106.92	92.958	137.86	45.345		0.24934	1.0657	1.1608	1.353	0.20147	0.75465	0.19215		2.5984	0.21622	0.94008	0.17288	0.26611	0.41948	0.26597		0.37437	0.2173	0.33998	0.26641	1.344	0.30425
	66.678	179.93	60.987	206.39	12.53	93.804	32.064		585.27	61.527	202.07	61.692	43.266	22.984	68.117		143.87	143.87	165.1	68.117	92.056	91.263	188.17	139.59	142.49	31.748		0.31277	1.0071	0.62073	0.74982	0.3896	0.45181	0.32209		0.44039	0.22004	0.63581	0.14345	0.398	0.26031	0.38402		1.5095	0.11496	1.9004	0.34829	0.44562	0.12426
	66.439	213.59	66.917	193.6	19.868	65.744	36.947		522.24	60.232	161.82	71.963	40.156	21.694	63.895		118.9	118.9	176.27	63.895	101.79	69.968	233.03	121.88	137.47	31.06		0.24766	0.76985	0.72593	0.32895	0.23476	0.24895	0.29262		1.1869	0.10138	1.6515	0.43909	0.29372	0.27869	0.67101		0.81437	0.15231	0.95936	0.67138	1.2137	0.28961
	67.398	228.92	75.471	168.01	29.234	48.735	44.443		452.14	59.245	128.46	80.555	39.519	20.775	59.885		95.823	95.823	183.35	59.885	104.38	52.616	270.81	103.95	132.17	31.827		0.28684	0.46816	0.27257	0.75542	0.19597	0.20033	0.14656		1.1391	0.41865	0.23834	0.19708	0.34422	0.26237	0.25452		0.81744	0.36404	0.88586	1.3096	0.99989	0.19032
	69.53	220.33	84.27	131.02	39.08	44.438	51.205		393.23	58.898	111.69	84.387	40.719	20.593	56.86		79.631	79.631	184.61	56.86	96.8	46.58	289.66	88.9	125.94	34.734		0.76258	0.45441	0.28344	1.5275	0.69191	0.054353	0.55264		0.37638	0.86091	0.024536	0.21866	0.59819	0.064136	0.26627		0.31026	0.29126	0.712	0.9549	0.89272	0.058142
	73.722	195.3	90.933	90.308	47.857	48	53.889		339.18	59.639	113.94	82.615	45.854	21.613	55.059		70.321	70.321	175.13	55.059	81.489	56.395	284.44	75.001	116.96	41.673		0.61329	0.025457	0.27149	0.59906	0.35628	0.44295	0.95399		0.19211	0.19221	0.17463	0.056892	0.41795	0.089581	0.77135		0.72631	0.070385	0.52516	0.35094	0.42522	0.22906
	79.991	162.21	93.083	53.538	54.467	56.935	51.39		277.83	61.246	128.73	77.292	55.348	23.59	53.97		64.563	64.563	156.06	53.97	62.98	77.145	263.04	60.164	105.65	52.185		0.40108	0.0084146	0.41249	1.2334	0.14711	0.12938	0.47329		0.051725	0.92762	0.9574	0.3011	0.36414	0.21372	0.091904		0.50398	0.27861	0.41635	0.34393	0.39675	0.60547
	87.005	129.42	88.64	28.382	59.941	68.754	45.94		218.67	63.048	152.43	69.685	66.053	25.827	53.229		62.365	62.365	134.78	53.229	45.809	102.03	233.18	47.008	94.764	63.437		0.12067	0.31941	0.073412	0.22314	0.36723	0.16361	0.2398		0.42564	0.92638	0.61741	0.078329	0.20792	0.27978	0.05398		1.5468	0.44348	2.1419	0.60908	0.38998	0.22135
	93.437	105.3	79.192	16.756	65.929	80.969	39.193		171.17	64.372	181.4	61.06	74.824	27.628	52.475		63.731	63.731	118.68	52.475	34.511	124.25	202.58	38.152	87.024	72.591		0.95905	0.53193	0.50731	1.0056	0.31009	0.044476	0.037376		1.0694	0.86044	1.0422	0.30778	1.3106	0.33391	0.11078		0.59677	0.1018	1.137	0.40008	0.65525	0.36431
	97.956	88.308	67.855	13.549	74.079	96.74	32.802		144.81	64.546	212.01	52.682	78.514	28.296	51.347		68.668	68.668	115.17	51.347	30.156	136.99	178.95	36.214	85.165	76.813		1.4553	0.52572	0.85841	1.8058	1.5138	0.62614	0.65846		2.0346	0.60781	0.77111	0.13314	0.26452	0.41152	0.13829		2.5347	0.93455	0.37673	0.93703	1.1184	0.30466
	97.166	72.861	57.745	15.882	86.043	117.72	28.421		150.03	63.658	250.03	43.314	74.344	27.357	49.632		78.016	78.016	124.77	49.632	29.722	136.51	162.39	45.018	92.886	74.497		2.424	1.3862	1.4903	1.7034	0.71246	0.21771	0.61608		1.1971	0.91837	0.52793	0.07452	0.33815	0.63599	0.22573		0.73486	0.37908	0.72637	0.67062	1.0685	0.27458
	91.954	61.282	51.979	20.88	106.88	139.18	25.445		180.49	62.154	297.89	32.112	64.411	25.275	47.573		91.773	91.773	142.56	47.573	31.601	127.35	147.75	62.818	108.36	67.533		0.85608	0.061248	0.064956	1.444	0.90507	0.28722	0.81333		0.93684	1.0048	0.085203	0.1838	0.20567	0.42122	0.33576		0.72225	0.47329	0.45977	0.26634	0.19836	0.015917
	87.414	55.897	51.369	25.665	135.48	156.38	22.771		220.57	59.906	346.92	20.933	52.886	22.761	45.485		108.68	108.68	167.73	45.485	34.188	115.13	134.89	83.88	126.05	58.33		1.017	0.70575	1.1626	0.5655	0.27776	0.35531	0.88232		0.75745	1.0503	0.56615	0.13966	0.36184	0.25494	0.56806		0.41194	0.85351	0.97086	1.468	0.10705	0.51867
	88.639	59.029	53.838	32.407	164.27	164.57	21.307		254.62	56.782	388.46	11.633	43.937	20.529	43.686		127.46	127.46	199.48	43.686	35.875	105.47	123.65	102.47	140.41	49.294		0.3124	0.46705	0.46405	0.33355	0.5859	0.098704	0.23682		0.59646	0.67606	3.2562	0.21396	0.07773	0.18369	0.27186		0.50282	1.8287	0.59097	1.2949	0.37087	0.47353
	100.72	76.211	58.167	43.024	185.66	161.8	21.961		267.01	52.652	413.86	6.0685	41.734	19.29	42.492		146.86	146.86	236.99	42.492	36.733	104.01	113.87	112.84	145.88	42.835		0.32147	0.75279	0.48367	0.19313	0.71506	0.4333	0.26151		0.16139	0.085919	0.41687	0.11583	0.49616	0.38507	0.31061		0.78805	0.70261	1.5024	0.36393	0.20877	0.30472
	131.2	105.89	63.136	54.261	192.05	151.22	25.64		250.75	45.014	421.17	5.3143	50.313	18.858	42.161		171.4	171.4	293.63	42.161	37.832	114.23	105.22	113.4	137.55	38.215		0.52186	0.30441	0.35469	0.56536	0.27585	0.23215	0.30579		1.2433	0.5912	1.7078	0.24322	0.41872	0.016656	0.28113		1.1169	0.60141	0.75146	0.49242	1.3385	1.1867
	176.68	139.78	67.524	62.865	177.42	135.78	34.639		216.26	33.954	416.16	8.1327	66.892	18.758	42.483		201.9	201.9	369.93	42.483	39.068	132.38	97.814	107.94	119.11	33.828		0.55934	1.3041	0.41764	0.039605	1.4879	0.84707	0.094374		0.92625	0.35141	0.94439	0.79057	0.40472	0.12008	0.36895		0.14368	0.76853	0.99509	0.28035	1.0466	1.0251
	225.85	169.56	72.289	65.581	146.84	118.41	48.351		174.03	23.227	401.76	12.912	85.421	19.269	43.07		231.61	231.61	445.86	43.07	40.336	153.23	92.138	98.915	97.954	30.78		1.0501	1.675	0.32676	0.70411	0.58734	1.1532	0.19892		1.1262	0.10762	0.80645	0.59885	0.23367	0.1985	0.41493		0.077034	0.44897	0.72741	0.73373	0.88047	0.59599
	267.41	186.96	78.243	58.56	109.33	102.05	63.337		134.53	16.585	380.86	18.04	99.849	20.67	43.534		253.76	253.76	501.37	43.534	41.534	171.55	88.694	88.734	81.457	30.177		2.2237	1.3097	0.1903	0.34439	0.2942	0.27052	0.091681		0.28043	0.069416	0.95983	0.31847	0.75113	0.45013	0.077249		0.28767	0.49494	0.44152	0.1616	0.28571	0.51836
	290.07	188.73	83.953	43.97	73.938	84.565	76.157		108.25	17.782	356.38	21.905	104.13	23.242	43.489		261.59	261.59	516.41	43.489	43.022	182.11	87.982	79.826	77.004	33.124		0.32945	2.5186	0.48882	0.65672	0.044715	0.14407	0.50966		1.0555	0.1223	1.9571	0.24733	0.44493	0.19737	0.24836		1.6369	0.67205	0.71302	0.78841	0.68423	0.69254
	288.93	180.43	87.982	27.587	49.699	64.013	83.372		96.661	28.924	322.71	24.866	93.995	26.973	42.217		249.17	249.17	474.69	42.217	44.872	179.98	87.52	70.985	91.204	40.008		0.88557	2.0203	0.14122	0.97072	0.31436	0.053733	0.33681		1.1443	0.20255	0.75084	0.28046	0.3468	0.21724	0.52984		0.13896	0.22104	0.18299	0.35127	0.63	0.33092
	271.54	166.87	88.895	15.186	38.758	43.568	82.799		92.777	47.51	277.91	27.998	73.487	31.679	39.978		221	221	389.58	39.978	46.538	168.63	86.975	60.594	119.13	50.094		0.20077	0.85875	0.42669	1.5772	0.25081	0.37433	1.0459		1.1135	0.71847	0.19281	0.2521	0.44201	0.17749	1.1869		1.5016	0.3781	0.42442	0.47804	2.5256	0.14971
	245.22	152.89	83.925	12.542	35.09	26.409	76.73		94.383	70.378	230.4	30.762	48.991	37.373	37.845		185.99	185.99	285.51	37.845	47.477	155.48	90.07	50.463	150.88	62.798		0.51378	0.22016	0.7287	0.79714	0.60272	0.1771	0.43593		2.3729	0.2502	0.39304	0.26605	0.90595	0.35945	0.30126		0.73381	0.19943	0.45292	0.70552	3.0507	0.047649
	217.27	143.32	74.027	22.624	35.477	15.713	68.441		99.264	94.368	188.57	32.62	26.894	44.069	36.894		153.03	153.03	186.91	36.894	47.144	147.93	100.53	42.399	176.54	77.539		0.089603	0.96041	1.2485	2.2897	0.81155	0.59173	0.73339		1.849	0.55357	3.199	0.21109	0.22201	0.17258	0.3949		1.1563	0.10794	0.24221	0.36867	0.52899	0.43037
	195.02	138.67	63.354	41.582	36.701	13.915	61.205		105.2	116.32	160.86	33.033	13.584	51.778	38.198		131.02	131.02	118.21	38.198	44.853	153.39	122.07	38.212	186.19	93.736		0.20365	1.3013	0.035441	0.12232	0.88364	0.31697	0.15819		1.2915	0.70945	1.6788	0.1571	0.11828	0.14472	0.31309		1.133	0.10948	0.3771	0.144	1.1662	0.40847
	175.29	135.74	56.061	64.963	35.543	18.897	58.297		109.21	138.74	148.72	31.216	11.065	63.158	42.143		121.21	121.21	83.057	42.143	40.969	179.57	163.55	39.912	174.84	116.16		0.70235	0.12149	0.29573	0.72917	0.52599	0.505	0.2663		2.1126	0.31266	0.66424	0.23787	0.21865	0.13613	0.033549		1.6663	0.19474	0.47677	0.18916	0.49854	0.49751
	110.99	115.43	47.092	180.38	26.547	183.26	109.27		267.78	52.487	302.12	57.068	116.54	25.96	73.316		181.07	181.07	69.011	73.316	51.506	83.607	157.65	141.81	183.46	40.904		1.3605	0.50855	0.40452	1.9222	0.20051	0.35195	0.47436		0.46886	0.5881	0.82553	0.057893	0.32123	0.015534	0.62603		0.51305	0.31482	0.95206	0.20862	0.31845	0.56631
	99.093	111.95	45.219	187.95	14.634	189.59	92.23		395.2	56.082	302.82	50.84	96.619	25.543	75.369		200.23	200.23	93.432	75.369	57.26	96.205	142.27	149.04	168.58	36.879		2.7186	0.35054	0.19761	0.8703	0.43281	0.27547	0.27733		0.084772	0.80913	0.32811	0.2619	0.61588	0.017182	0.93338		0.35665	0.51658	3.2446	0.33819	0.20244	0.49016
	87.154	112.07	45.622	195.56	7.5915	186.12	72.211		504.69	60.325	298.8	46.185	77.933	25.065	76.544		214.9	214.9	117.1	76.544	62.647	106.22	131.82	152.87	153.95	33.601		0.56255	0.43336	0.76628	1.925	0.42492	0.060274	0.33479		0.39475	1.5161	0.73415	0.078781	1.0274	0.15669	0.62592		0.27421	0.34542	1.5375	0.16727	0.4711	0.61155
	78.961	119.31	47.794	203.57	3.7808	167.19	54.127		567.03	62.251	287.33	44.96	63.495	24.622	76.218		217.17	217.17	133.76	76.218	68.851	109.57	132.57	151.69	143.65	31.15		0.65334	0.32885	0.10175	0.78101	0.51935	0.15203	0.22483		0.32091	1.9657	0.85506	0.10383	0.39598	0.028249	0.31553		0.78693	0.66175	0.65853	0.048555	0.080715	0.048626
	74.419	133.35	51.231	208.63	1.5651	135.41	42.888		571.05	61.572	262.3	49	53.054	24.112	73.767		202.88	202.88	142.76	73.767	76.251	102.3	150.9	143.61	138.77	29.088		0.37295	2.2848	0.52801	0.21257	1.7715	0.073031	0.29093		0.61641	0.96753	0.31213	0.099725	2.5896	0.28901	0.3175		0.54226	0.38912	1.3648	0.26059	0.26042	0.54245
	71.005	148.88	55.426	207.41	1.4927	99.252	40.515		536.21	60.266	225.51	57.068	44.601	23.47	69.606		177.29	177.29	148.27	69.606	83.07	87.126	182.67	129.7	136.62	27.359		0.65155	0.2009	0.67362	0.36735	1.5609	0.20772	0.10188		0.17592	1.2263	1.0895	0.22341	0.6217	0.34192	0.070819		0.45055	0.36439	0.37362	0.0033898	0.3581	0.64727
	68.861	160.63	62.137	196.54	4.6552	67.204	43.734		479.28	58.764	186.14	66.411	38.514	22.85	64.671		146.65	146.65	151.27	64.671	87.527	69.989	218.26	112.8	135.52	26.624		0.417	1.8995	0.25165	0.53283	0.19036	0.21844	0.47411		0.92419	0.6259	0.54111	0.56311	1.0596	0.5006	0.92236		0.35025	0.78899	0.71935	0.60602	0.48957	0.35882
	68.128	163.3	71.702	170.15	10.23	47.753	49.513		417.06	57.494	153.38	74.275	35.17	22.407	59.9		117.21	117.21	152.73	59.9	87.845	56.812	248.04	95.758	133.79	27.542		0.28953	1.2626	0.37635	0.65089	0.24176	0.25939	0.3032		0.62457	1.0212	1.0219	0.47492	0.059433	0.20872	0.42118		0.674	1.3871	0.49283	0.3572	0.46079	0.35429
	68.95	153.97	81.483	130.47	17.394	43.045	54.823		366.33	56.887	136.41	77.907	34.945	22.297	56.229		95.2	95.2	153.62	56.229	82.144	53.526	262.4	81.41	129.77	30.773		1.3678	0.41674	0.90941	0.71238	0.38152	0.33033	0.19057		0.83894	0.83807	0.17909	0.37596	0.67804	0.17059	0.18075		0.48666	0.60883	2.0886	0.92975	0.7821	0.731
	71.57	136.17	88.843	86.321	25.325	47.421	56.631		321.91	57.214	137.66	76.584	40.346	22.766	53.799		79.904	79.904	151.8	53.799	71.611	64.515	256.72	67.864	121.2	38.339		0.41148	0.47752	0.30002	0.61827	0.24248	0.083968	0.48935		0.38404	0.30175	1.7889	0.12424	0.21332	0.19751	0.19977		0.099788	1.6459	1.511	0.75358	0.33729	0.68492
	75.893	114.29	91.145	46.528	33.049	57.665	54.13		272.64	58.19	151	72.139	51.121	23.712	51.985		67.156	67.156	146.61	51.985	59.063	85.827	237.41	53.227	109.2	49.8		0.6871	0.74075	0.11715	0.99114	0.59755	0.66236	0.26813		0.57959	1.0508	1.5981	0.1213	0.096582	0.29993	0.16221		1.8607	1.1203	0.40596	1.1618	0.25543	0.095393
	81.554	92.689	85.938	19.912	41.115	70.561	49.341		226.24	59.405	172.79	65.661	63.511	24.764	50.577		58.046	58.046	141.29	50.577	47.318	110.88	211.41	40.338	97.143	62.123		0.6535	0.22017	0.083809	1.6982	1.3101	0.14146	0.23187		0.082307	0.46516	1.184	0.088903	0.0090763	0.034426	0.21583		0.60766	0.2662	0.72051	1.3537	1.8652	0.53444
	88.185	75.764	74.982	8.5903	50.983	82.891	43.475		190.44	60.452	199.4	58.236	73.757	25.55	49.363		53.663	53.663	139.07	49.363	39.192	133.11	185.63	32.035	88.393	72.274		2.4776	0.56018	0.93604	0.23497	0.44092	0.47345	0.3582		1.4255	0.49819	0.85558	0.13853	0.25346	0.051281	0.24744		0.36292	0.38634	0.90534	1.3623	1.2026	0.064792
	95.418	61.848	61.95	6.6815	64.114	97.362	37.743		172.99	60.923	227.16	50.954	78.1	25.702	48.133		55.098	55.098	143.17	48.133	35.309	145.91	167.02	31.156	86.318	77.221		0.5214	0.75912	0.80197	0.42869	1.9015	0.9189	0.36773		1.9467	0.35864	0.56462	0.041509	0.65549	0.072742	0.18869		1.0162	0.47454	0.67404	1.6643	1.174	0.28376
	103.34	48.021	50.516	11.009	81.969	116.12	33.356		184.33	61.175	261.54	42.69	73.424	24.961	46.883		63.642	63.642	152.55	46.883	33.793	145.44	156.68	41.892	94.6	75.339		1.3192	0.48207	0.10691	0.43969	0.98614	0.89929	0.22538		0.37756	0.55907	1.8998	0.47923	0.29493	0.03627	0.90035		0.64798	0.63963	1.3335	1.5065	0.4495	0.955
	112.2	36.777	44.352	18.396	111.42	135.1	29.287		219.31	61.479	304.97	32.718	62.234	23.574	45.752		78.569	78.569	165.03	45.752	33.705	136.07	150.01	62.352	110.99	68.651		0.55597	0.34183	0.61977	0.69713	1.4595	0.63428	0.11426		2.1404	0.58854	0.4709	0.29925	0.30729	0.58889	0.31436		0.79976	0.41872	1.5994	0.24854	0.77735	0.27885
	121.86	30.61	44.796	25.666	151.5	150.25	24.727		262.25	61.3	349.26	22.725	49.206	21.928	44.747		97.941	97.941	182.22	44.747	34.11	123.61	145.31	86.248	129.97	59.592		0.30688	0.30729	0.46246	0.40451	0.2178	0.079284	0.13443		1.1337	0.56697	0.38665	0.22432	0.26119	0.16978	0.72548		1.0984	0.93661	0.68376	0.50613	0.1213	0.71236
	132.2	32.015	49.398	35.451	191.9	157.51	21.219		297.45	60.103	386.24	14.397	39.013	20.409	43.875		119.82	119.82	205.72	43.875	34.072	113.85	140.93	107.29	146.03	50.6		1.0654	0.29599	0.46751	0.49599	0.34181	0.068886	0.28896		0.59274	0.43183	0.72109	0.49422	0.56096	0.20986	0.27469		0.47322	0.46505	0.85065	0.13473	0.15237	0.17362
	143.08	45.041	56.154	49.87	222.29	155.31	20.305		309.24	57.353	407.72	9.4194	36.332	19.404	43.143		142.27	142.27	237.13	43.143	33.574	112.6	135.17	119.2	153.63	44.111		2.2452	0.26411	0.21613	1.3165	0.12104	0.083563	0.67295		2.0283	0.096176	1.5887	0.19429	0.30163	0.23234	0.79781		1.6626	0.48079	0.33911	0.12674	0.49204	0.11872
	155.24	68.026	63.06	64.973	232.36	146.36	23.527		289.85	50.628	411.2	8.7545	45.24	18.576	42.662		169.78	169.78	289.08	42.662	33.241	123.71	126.53	120.24	148.81	39.432		2.2441	0.56412	0.2698	0.38149	1.2735	0.16744	0.097314		1.1466	0.48069	1.4962	0.36564	0.77586	0.20067	0.89842		0.70244	0.47755	0.71032	0.75412	0.47759	0.068294
	168.79	94.894	68.115	76.812	214.19	133.01	33.725		249.73	40.285	402.13	11.278	62.622	17.667	42.429		203.65	203.65	360.51	42.429	33.096	143.33	116.12	114.58	135.23	34.938		0.58291	0.87101	0.56881	0.39053	0.14521	0.061534	0.82431		1.4807	0.29662	0.93073	0.16746	0.39887	0.31981	0.40728		1.0451	0.91935	0.24724	0.76587	0.29511	0.19146
	182.59	119.57	71.55	81.438	174.65	117.59	49.872		200.54	29.956	384.28	15.547	82.358	17.183	42.274		237.14	237.14	432.46	42.274	33.165	165.66	106.22	104.85	118.87	31.669		0.37874	0.61438	0.28718	0.16482	0.13794	0.25934	0.39238		0.87995	0.041212	0.74023	0.027485	0.1134	0.18043	0.53984		0.87219	0.80574	1.6395	0.49323	1.3202	0.11092
	195.53	135.99	74.701	74.69	125.64	102.46	67.706		153.92	23.273	361.37	20.12	98.332	17.629	42.028		263.48	263.48	485.97	42.028	33.472	184.88	99.098	93.658	105.71	30.665		0.75202	0.10516	0.48473	0.67583	0.31035	0.2438	0.44899		0.48333	0.064788	1.3965	0.093447	0.22274	0.14421	0.38685		1.233	1.6791	0.39866	0.13939	0.37484	0.58739
	206.47	142.26	77.219	59.202	79.027	85.393	82.966		121.54	23.868	337.16	23.552	104.42	19.512	41.523		275.94	275.94	502.07	41.523	34.202	195.22	97.036	83.62	101.72	32.965		1.6318	0.79766	1.2039	0.40839	0.49261	0.17309	0.36342		0.76209	0.58323	0.62705	0.11468	0.70073	0.17637	0.72343		1.0157	0.32135	1.8233	0.14244	0.42433	0.64945
	217.54	142.44	78.753	41.213	46.695	64.822	91.391		104.59	33.564	307.21	26.214	96.748	22.928	39.848		269.7	269.7	466.73	39.848	35.339	191.68	97.302	73.168	111.86	38.805		0.98721	0.27632	0.15431	0.28641	0.404	0.24966	1.1519		0.076362	0.70827	0.25784	0.16985	0.11783	0.4753	0.55139		0.17983	0.1247	1.2906	0.42192	0.37775	0.34552
	229.5	139.34	78.952	26.964	30.744	44.081	90.412		95.304	49.942	269.03	29.068	79.382	27.539	37.117		249.26	249.26	392.6	37.117	36.605	178.15	98.378	60.56	132.17	47.492		1.3419	0.10587	0.38432	0.30685	0.36299	0.48482	0.66209		0.85783	1.2951	1.7597	0.51652	0.16414	0.59111	0.16715		1.0309	0.11814	0.96838	0.47761	0.40323	0.27041
	239.15	135.79	76.053	22.695	23.254	26.504	82.869		91.88	70.264	229.27	31.56	58.157	33.201	34.694		221.83	221.83	300.72	34.694	37.723	162.07	104.36	48.146	155.18	58.672		0.12568	0.57317	0.45662	0.37931	0.29529	0.10451	0.093056		0.092952	0.86478	0.97411	0.17238	0.7133	0.42742	0.39853		1.118	0.89917	0.6485	0.53829	0.39194	1.3399
	243.3	134.62	70.288	31.456	21.075	15.422	72.617		92.516	91.792	194.57	33.133	38.904	39.77	33.941		194.65	194.65	212.13	33.941	38.415	150.91	119.35	38.276	173.42	71.99		0.79431	2.9159	0.45365	0.17175	0.38855	0.12362	1.5158		0.49001	0.44497	0.34182	0.11204	1.0342	0.47161	0.2316		0.85665	1.2125	1.2587	0.75175	0.79431	0.86942
	238.78	137.06	64.304	49.085	21.057	13.121	63.511		95.408	111.79	171.58	33.233	27.454	47.102	36.222		174.92	174.92	147.87	36.222	38.643	152.1	147.44	33.303	179.43	87.092		0.6725	0.93825	0.95414	0.44244	2.1338	0.083951	0.56334		0.30474	0.84264	0.41351	0.14391	0.8808	0.39458	0.47789		0.62295	0.13338	0.83557	0.48059	0.5063	0.93697
	219.59	141.24	60.748	71.011	20.05	17.378	59.404		98.133	132.71	161.99	30.914	25.6	57.531	42.864		162.36	162.36	108.98	42.864	38.592	172.43	200.36	35.627	169.5	108.49		0.46944	0.37144	1.118	0.36345	0.4032	0.078635	0.61418		0.47131	0.86367	2.387	0.29112	1.391	0.24462	0.71554		0.92236	0.90876	0.33544	0.27233	0.13461	0.18772
	187.85	145.28	62.265	92.659	17.802	24.768	62.699		101.89	156.39	161.37	26.546	29.456	71.154	52.956		152.15	152.15	81.428	52.956	38.319	206.92	275.39	43.682	148.59	136.42		0.3687	0.68931	1.0809	0.42206	0.14985	0.3507	0.44502		0.85267	0.28087	0.43208	0.047732	0.34506	0.14956	0.32439		0.46633	0.85097	0.66465	0.4979	0.43914	0.8212
	152.56	147.35	71.373	109.46	16.414	31.862	70.828		110.32	179.13	167.18	21.548	36.33	84.468	64.511		144.73	144.73	63.663	64.511	37.881	245.41	354.92	53.865	122.28	164.11		0.10376	0.25544	0.30637	0.42907	0.24326	0.11438	0.12762		0.19521	0.48435	0.9024	0.19771	0.50192	0.21693	0.097401		0.80849	0.097561	1.4984	0.27801	0.43177	0.69337
	122.68	145.57	86.308	121.86	16.263	35.236	80.185		127.06	197.25	176.88	17.34	43.531	93.974	75.538		140.54	140.54	54.125	75.538	37.337	277.78	421.36	62.57	96.178	184.8		0.10388	1.1577	0.5943	0.65057	0.41153	0.12087	0.1684		0.20041	0.61981	1.1902	0.33824	0.46529	0.25089	0.14728		1.5526	0.79803	0.46937	0.81983	0.84236	0.55409
	107.19	137.48	103.29	132.91	17.725	33.91	87.167		155.74	207.06	187.92	15.34	48.369	96.172	84.049		140.03	140.03	51.256	84.049	36.507	293.85	457.09	66.193	75.852	191.72		0.96721	1.615	0.6329	0.61019	1.3918	0.013204	0.30533		0.73292	0.77816	2.2233	0.17303	0.19238	0.28005	0.11409		2.3787	1.0194	1.4991	0.076047	0.86004	0.21713
	111.82	124.3	118.55	141.93	21.177	30.169	88.17		207.5	207.4	202.57	16.018	51.233	87.811	90.436		146.53	146.53	59.574	90.436	35.351	285.25	454.22	61.841	59.864	179.6		0.71861	0.46459	0.22835	0.23344	0.52431	0.17188	0.12408		1.4877	0.080199	1.0541	0.12582	0.18948	0.024214	0.14227		0.58111	0.29546	0.34541	1.3565	0.93391	0.16713
	89.159	171.91	77.634	111.36	154.8	118.57	103.09		91.405	86.679	318.91	61.504	146.75	23.43	55.679		165.18	165.18	74.291	55.679	26.929	106.64	175.36	104.64	161.64	65.369		0.53398	0.38887	0.48065	0.79234	0.79381	0.28875	0.15108		0.93322	0.48569	0.38679	0.17799	0.58833	0.030041	0.75349		0.32843	0.23842	0.6255	0.34616	1.2497	0.13555
	116.64	151.52	68.421	120.62	116.63	129.21	114.7		92.88	65.72	329.06	58.861	140.63	25.358	59.52		158.91	158.91	54.149	59.52	28.859	110.19	173.33	113.66	182.41	59.282		0.79058	0.88821	0.39355	0.5838	2.2865	0.45682	0.3104		1.6219	0.13273	0.56179	0.5334	0.42985	0.17268	0.071087		1.4623	0.37592	1.6335	1.141	0.24983	0.69327
	132.28	142.8	61.027	129.86	81.35	141.26	122.55		114.19	52.139	335.08	55.978	132.98	26.501	62.821		160.33	160.33	45.715	62.821	34.74	110.53	170.96	120.72	192.88	53.865		0.11584	1.1013	0.36848	0.10659	1.2977	0.64367	0.43187		0.83402	0.080837	0.20427	0.55673	0.4882	0.15024	0.5717		0.81975	0.73919	0.93511	1.0917	0.37124	0.82195
	133.12	140.44	55.223	139.02	53.956	155.03	124		168.78	47.974	337.41	52.043	122.62	26.602	65.974		176.25	176.25	53.667	65.974	44.333	107.69	166.2	126.64	189.76	48.64		0.41772	1.9884	1.5208	0.65283	0.45591	0.26122	0.43447		0.46929	0.15296	0.63654	0.46581	0.27803	0.533	0.22002		0.67768	0.66445	2.6021	1.085	0.47775	0.45952
	124.64	141.28	50.78	148.03	35.206	167.15	115.91		250.96	50.177	336.88	46.998	109.28	25.993	69.343		205.49	205.49	73.61	69.343	55.286	104.67	158.02	132.22	177.47	42.713		0.37469	0.97762	0.35502	0.20374	0.10689	0.1688	0.021149		1.2495	0.52091	0.89068	0.26928	0.66537	0.13114	1.3531		0.58812	1.0318	2.1079	0.4525	1.2975	0.77859
	111.3	142.13	47.614	156.84	21.776	174.24	100.07		340.57	55.691	332.82	42.057	94.723	25.062	72.343		237.85	237.85	98.529	72.343	65.248	101.44	149.49	136.22	160.97	36.797		0.48119	0.055125	0.14046	0.20592	0.27236	0.17397	0.14268		0.34197	0.18747	0.60123	0.22093	0.16048	0.11701	0.33568		0.29186	0.22458	2.6867	0.24335	0.59416	0.06328
	97.553	139.82	45.876	168.8	12.523	172.91	81.147		417.44	61.455	324.53	38.435	80.711	24.193	74.39		263.17	263.17	121.41	74.39	71.87	97.965	143.7	137.42	145.17	31.609		2.9076	0.37343	0.35615	0.18001	0.13739	0.79205	1.0571		0.91988	0.34947	0.83508	0.091164	0.39037	0.17425	0.76414		0.31312	1.6004	1.2242	0.44109	0.73959	0.24079
	87.846	134.1	45.695	183.95	6.3051	158.37	63.827		461.43	64.413	311.33	37.349	69.011	23.773	74.896		271.25	271.25	135.24	74.896	74.751	94.194	143.74	134.59	135.03	27.864		0.27705	0.8233	0.48018	0.14044	0.27418	0.50771	0.30506		3.1454	0.40422	0.097086	0.3468	1.629	0.28616	0.59018		0.78805	1.6522	0.18331	0.46819	0.94213	0.37596
	81.928	127.07	47.2	197.26	1.9799	132.88	52.788		464.37	64.223	288.17	40.096	58.802	23.969	73.364		256.91	256.91	136.87	73.364	75.459	88.365	153.22	126.06	132.27	25.168		2.2217	1.9387	0.43294	0.58385	0.88838	0.14646	0.18198		2.738	0.85258	0.48035	0.93967	1.0416	0.40819	0.040373		0.45441	0.42831	0.23717	0.34069	0.48625	0.047971
	76.831	119.14	50.519	203.71	-0.21207	103.62	49.777		439.72	62.924	255.52	45.866	48.908	24.525	70.184		226.92	226.92	130.99	70.184	74.592	80.502	170.08	112.65	133.6	23.045		0.6171	2.0081	0.42927	1.0052	0.92968	0.25575	0.53852		1.8247	0.39457	0.70446	0.85632	0.90456	0.25398	0.61431		0.3655	0.34689	1.4588	0.20523	0.25199	0.17493
	72.936	110.68	57.825	198.27	0.49061	77.789	51.675		399.69	61.028	220.94	52.712	40.559	25.188	66.104		189.09	189.09	122.3	66.104	72.751	73.259	188.91	96.865	136.43	22.084		0.77729	1.0286	0.9231	1.1358	0.74621	0.44104	0.16155		1.5955	1.399	0.98506	0.32249	0.75723	0.031865	0.10487		0.45116	0.85236	1.4032	0.26938	0.18607	0.080075
	70.619	102.09	69.032	174.73	3.7273	62.577	55.859		356.5	59.046	191.99	58.684	34.984	25.706	61.872		151.21	151.21	115.52	61.872	70.534	69.285	204.27	81.194	138.15	22.876		0.29949	1.3199	1.271	0.66157	0.29898	0.23892	0.23842		0.98907	0.47295	0.95663	0.15349	0.24747	0.060501	0.46598		0.77417	1.2542	1.6562	0.51857	0.10959	0.15347
	70.26	93.063	80.881	136.43	9.1376	60.217	59.71		322.37	57.49	176.25	61.834	33.413	25.828	58.236		121.08	121.08	115.36	58.236	67.583	71.231	210.74	68.138	136.14	26.009		0.44595	0.81228	1.0129	0.5627	0.070706	0.52932	0.35815		0.77665	0.26244	1.7798	0.14773	0.59967	0.15305	0.28761		0.28003	0.42425	0.52619	0.80668	0.32595	0.44555
	71.563	83.349	90.113	92.709	16.361	65.915	60.605		293.39	56.117	175.94	61.871	38.528	25.434	55.02		96.396	96.396	123.64	55.02	63.499	82.517	204.94	55.84	127.61	33.465		0.44818	0.25967	0.9606	0.14507	0.70042	0.37293	0.23864		1.3288	0.18221	1.6848	0.067831	0.17982	0.79363	0.41799		2.4879	0.19093	1.0328	0.6146	0.63023	0.28093
	74.275	73.391	93.47	52.865	24.525	76.321	57.9		261.4	54.587	186.01	60.094	49.508	24.69	51.725		71.965	71.965	137.23	51.725	58.818	101.38	190.48	42.634	114.28	44.849		0.043822	0.74369	0.0853	0.32165	0.31062	0.18977	0.40395		1.107	1.1793	1.728	0.11864	0.15693	0.17798	0.87157		0.43714	0.35974	0.31055	0.73335	0.91518	1.2573
	78.84	63.636	88.232	26.215	33.869	88.084	53.343		232.28	53.263	203.13	56.94	62.331	23.778	48.616		51.233	51.233	153.38	48.616	54.081	122.68	172.44	31.307	100.38	57.192		0.13191	0.45995	0.076799	0.26948	1.6905	0.20674	0.29062		0.81568	0.87806	1.1686	0.18628	0.52436	0.22059	0.30994		1.3011	0.90464	0.68883	0.049064	0.80496	1.3592
	85.704	54.53	76.571	14.383	45.704	97.854	47.9		211.93	52.509	223.97	52.846	72.978	22.879	45.955		37.65	37.65	169.35	45.955	49.825	141.29	155.9	24.646	90.112	67.524		1.8827	1.0593	0.98149	0.12239	0.095593	0.17002	0.22979		0.23884	1.0168	0.65593	0.45701	0.26997	0.47649	1.0495		0.93769	0.30642	0.98208	0.81472	0.47547	0.42684
	95.311	44.404	62.567	11.161	61.336	107.07	42.538		206.22	52.69	245.23	48.249	77.425	22.176	44.005		34.663	34.663	182.42	44.005	45.944	152.09	145.92	25.437	87.699	72.875		1.1366	0.24987	0.90944	1.0626	0.91594	0.13471	0.11761		0.53059	0.32192	2.2611	0.53204	0.84179	0.43582	0.36559		0.85054	0.16683	0.42738	0.9616	0.52746	0.43142
	110.87	32.96	50.3	14.112	82.074	117.98	38.224		225.1	54.799	271.4	42.127	72.535	21.766	43.035		45.227	45.227	189.11	43.035	42.077	151.58	144.93	38.1	96.893	71.802		0.53348	0.62936	0.47617	1.5832	0.36505	0.1025	0.097346		1.4229	0.38313	0.81855	0.2209	0.29365	0.36559	0.098258		0.28368	0.13389	1.5328	0.33314	0.53996	0.27839
	132.09	22.703	43.852	20.8	115.73	128.4	33.809		264.62	58.59	304.72	34.189	60.989	21.53	42.867		67.04	67.04	191.26	42.867	38.387	143.17	149.56	60.777	114.88	66.285		0.43956	0.54219	0.42751	0.66975	0.87852	0.14893	0.1421		0.16353	0.84745	0.31783	0.046137	0.23614	0.21334	0.18044		1.6071	0.68497	1.8448	0.49155	1.6266	0.62383
	154.15	16.134	44.875	28.79	161.42	136.18	28.649		309.91	62.578	338.4	25.968	47.494	21.318	43.102		95.675	95.675	194.05	43.102	35.034	132.11	156.15	86.839	136.04	58.488		0.19987	0.22698	0.12649	0.17754	0.30426	0.23126	0.068568		0.12205	0.3987	1.7625	0.18398	0.30266	0.082431	0.34319		0.41416	1.0479	1.3711	1.6675	0.76536	0.29672
	172.24	15.758	50.647	41.512	207.44	139.14	24.466		346.05	65.275	365.66	18.996	36.759	20.98	43.339		126.7	126.7	202.68	43.339	32.18	123.66	161.09	109.66	154.73	50.579		0.57	0.21725	0.77757	0.60574	0.29313	0.30437	0.40813		0.16716	1.16	1.2769	0.10402	0.39797	0.083201	0.19029		1.0058	0.26541	3.1628	1.3447	0.93962	0.17574
	181.53	23.982	58.691	60.59	242.08	136.44	22.982		358.16	65.191	379.72	14.804	33.493	20.369	43.18		155.7	155.7	222.35	43.18	29.816	123.07	160.73	122.61	165.33	44.722		1.6914	0.027616	0.5864	0.53035	1.1884	0.055769	0.66213		0.2661	0.20387	0.13438	0.13393	0.2384	0.11304	0.30371		1.9987	0.91579	1.3051	0.10647	0.34532	0.37773
	176.62	39.137	66.529	80.879	253.64	129.53	25.921		338.27	60.041	377.61	14.139	41.185	18.811	42.596		186.31	186.31	263.74	42.596	27.837	134.09	151.51	123.75	165.17	40.249		0.93127	0.37383	0.42766	0.84577	0.059001	0.38281	0.20447		0.46853	0.64626	1.7532	0.13237	0.55618	0.17202	0.12289		0.4399	0.39314	0.45994	0.51984	0.31959	0.50085
	160.71	57.612	71.683	97.233	233.05	119.67	36.244		296.29	50.817	363.87	15.978	56.696	16.408	41.854		221.48	221.48	323.39	41.854	26.252	153.23	135.85	117.52	157.99	35.715		0.91563	1.1823	0.70553	0.25706	0.5059	1.1447	0.67115		0.077094	0.28175	0.26582	0.30046	0.71219	0.12123	0.27447		0.24563	0.26921	0.3344	0.16945	0.95194	1.5816
	141.93	75.796	73.872	104.51	188.14	108.14	52.802		244.2	40.948	342.92	19.204	74.792	14.165	40.995		255.74	255.74	385.27	40.995	25.073	174.84	119.1	106.8	147.81	32.125		1.059	0.20649	0.44707	0.22389	0.43835	1.4701	0.037604		0.14982	0.43666	0.34759	0.69908	0.55874	0.063134	0.62805		0.97979	0.60838	1.783	1.3808	0.34715	0.58146
	128.4	90.078	74.75	98.313	132.47	96.204	71.153		193.95	33.864	319.22	22.701	90.238	13.09	40.061		283.64	283.64	433.34	40.061	24.311	193.29	106.62	94.481	138.65	30.483		2.669	0.58028	0.44729	1.1666	0.15799	0.55644	0.38232		0.33095	0.23548	2.2941	0.61244	0.42339	0.32412	0.29676		0.31274	0.16834	2.4875	1.0388	0.46547	0.33158
	128.24	99.92	74.736	82.079	79.604	82.018	86.854		157.52	32.995	297.2	25.35	97.8	14.189	39.093		299.69	299.69	451.56	39.093	23.821	202.93	103.77	83.46	134.51	31.792		1.0054	0.71647	0.41968	1.3502	0.5412	0.017061	0.030776		0.0061878	0.58425	0.83807	0.94453	0.21087	0.081773	0.59393		2.2364	0.40632	1.3896	0.19038	1.2525	0.42328
	149.83	107.73	74.246	62.391	43.108	64.732	95.462		135.23	39.628	274.11	27.554	94.726	18.054	36.868		300.94	300.94	430.64	36.868	23.593	199.61	108.23	71.969	137.87	36.231		0.15234	0.42976	0.086857	0.83789	0.42645	0.25395	0.51135		1.6651	0.62921	0.69064	0.25322	0.84138	0.19419	0.19247		0.74258	0.2474	1.2433	0.73049	0.50059	0.11716
	187.77	114.31	73.7	45.832	25.136	47.121	94.331		119.13	51.475	246.99	30.057	84.507	24.012	33.358		291.02	291.02	381.27	33.358	23.849	187.1	116.45	58.079	146.05	43.13		1.2706	0.31836	0.22276	0.54931	0.11265	0.15769	1.3761		0.77803	0.36925	1.5733	0.2748	0.41493	0.17222	0.65333		0.32049	0.37165	0.42656	0.64219	1.4857	0.36307
	229.47	120.48	72.055	38.986	16.642	31.957	86.422		108.69	66.607	219.98	32.258	71.269	31.179	30.398		274.4	274.4	317.39	30.398	24.807	171.61	131.88	44.441	155.35	52.223		2.2438	0.32239	0.30799	1.4703	0.38342	0.23978	0.6711		0.74806	0.85191	1.6189	0.63292	0.772	0.4722	0.41455		0.88872	0.75505	0.82601	0.42459	2.4575	0.19278
	262.36	127.03	69.034	44.659	14.4	22.011	75.705		103.38	83.095	197.2	33.554	59.137	38.669	29.824		255.53	255.53	252.95	29.824	26.686	159.35	157.98	33.705	162.05	63.242		0.53697	0.83587	0.86516	0.60753	0.4089	0.12765	0.763		1.1124	0.70389	0.27428	0.85596	0.93226	0.17431	0.93407		0.73906	0.31144	1.6621	0.64336	0.85259	0.3873
	273.86	135.82	66.197	58.461	15.179	18.899	66.15		102.71	99.008	182.81	33.344	52.238	45.597	33.472		238.86	238.86	201.9	33.472	30.426	156.54	198.2	28.52	162.43	75.92		2.086	0.59405	1.3614	2.1873	0.066422	0.050232	0.50009		1.0008	0.51789	0.17216	0.76431	0.31022	0.15726	0.88425		0.47414	0.19429	3.063	0.51469	0.27344	0.12467
	255.58	146.32	65.109	76.185	15.75	20.77	61.726		106.01	116.66	178.89	30.467	51.775	53.329	43.8		221.95	221.95	161.39	43.8	35.879	168.18	268.14	31.56	154.49	93.765		0.77783	0.15514	0.94809	0.50972	0.25002	0.23763	0.1643		0.50893	1.529	0.9474	0.047126	0.26127	0.093595	0.39754		0.20229	0.86347	0.68504	0.41314	0.37636	0.11794
	215.9	155.74	67.331	93.622	16.648	25.205	64.983		113.65	137.35	182.68	25.325	54.996	62.454	59.585		201.81	201.81	122.13	59.585	41.639	190.14	365.48	41.059	140.7	116.95		0.9066	0.52294	0.3601	0.81277	0.35569	0.087614	0.41262		0.95214	0.15037	0.45752	0.20353	0.88666	0.11711	0.55483		0.86989	0.57655	0.61572	0.50403	0.14636	0.37513
	167.42	161.3	74.427	106.57	20.027	29.786	73.275		126.57	157.58	191.05	19.658	60.099	70.926	77.139		182.14	182.14	88.375	77.139	46.296	214.89	466.86	53.005	124.07	140.23		0.28975	0.18195	0.11461	1.7717	0.49156	0.36581	1.1709		0.58551	0.59399	1.0643	0.22283	0.37956	0.46741	0.14146		0.26921	0.62337	0.62219	1.0186	0.31466	0.7061
	122.7	160.23	85.356	114.72	25.084	32.09	82.777		145.75	173.9	200.84	15.209	65.279	76.695	92.769		166.63	166.63	64.405	92.769	48.443	234.94	548.88	63.39	107.62	158.32		0.11944	0.69419	0.50414	1.2416	0.76788	0.15189	0.95414		2.3699	0.46651	0.23076	0.12911	0.34363	0.70008	0.85571		0.24272	0.25425	2.1083	0.71709	0.35492	0.27022
	94.338	148.03	97.772	120.88	31.015	31.722	89.666		172.16	182.82	208.93	13.719	68.734	77.715	102.79		158.95	158.95	54.483	102.79	46.848	242.76	588.18	68.204	94.339	165.97		0.85731	0.32059	0.17631	0.22233	0.14466	0.21085	0.68245		1.0997	0.8257	0.41721	0.024943	0.36398	0.13748	0.42686		0.76441	0.49183	0.60576	0.56794	0.38801	0.28939
	85.896	126.55	109.33	125.51	37.016	30.294	90.119		214.94	183.22	213.29	16.124	70.985	71.868	106.23		162.79	162.79	65.249	106.23	42.449	231.03	571.75	64.434	83.457	159.77		0.55717	0.22958	0.12327	0.28906	0.45024	0.23268	0.061902		0.46781	0.3524	0.69689	0.057261	0.32695	0.15271	0.39039		0.78291	0.60967	0.20675	1.0249	1.9339	0.91678
	51.298	90.309	61.227	33.118	131.65	164.59	25.094		213.04	56.335	362.64	10.902	53.919	21.838	42.021		162.98	162.98	177.31	42.021	37.477	98.936	106.92	92.958	137.86	45.345		0.73051	0.2976	0.2193	0.78592	0.57116	0.30391	0.072844		0.11006	0.65095	0.50619	0.34436	0.55406	0.38762	0.46164		0.29419	0.28823	0.27698	0.27604	0.50413	0.20569
	66.678	179.93	60.987	206.39	12.53	93.804	32.064		585.27	61.527	202.07	61.692	43.266	22.984	68.117		143.87	143.87	165.1	68.117	92.056	91.263	188.17	139.59	142.49	31.748		0.6593	0.2487	0.27741	0.43467	1.8399	0.14784	0.42688		0.28728	1.7381	1.1977	0.0385	0.40414	0.285	0.54525		0.33272	0.11887	0.45393	0.2702	0.55531	0.4125
	66.439	213.59	66.917	193.6	19.868	65.744	36.947		522.24	60.232	161.82	71.963	40.156	21.694	63.895		118.9	118.9	176.27	63.895	101.79	69.968	233.03	121.88	137.47	31.06		0.29209	0.22893	0.30094	0.37312	0.38717	0.36198	0.32732		0.43462	1.5291	2.4501	0.37367	0.092906	0.078416	0.08753		0.67958	0.092697	0.75349	0.53361	0.96803	0.065309
	67.398	228.92	75.471	168.01	29.234	48.735	44.443		452.14	59.245	128.46	80.555	39.519	20.775	59.885		95.823	95.823	183.35	59.885	104.38	52.616	270.81	103.95	132.17	31.827		0.48063	0.32243	0.41978	0.24586	0.80808	0.088922	0.20246		0.31805	0.24685	2.8134	0.32701	0.84063	0.25081	0.056683		0.57088	0.22641	1.3947	0.38183	0.28541	0.10037
	69.53	220.33	84.27	131.02	39.08	44.438	51.205		393.23	58.898	111.69	84.387	40.719	20.593	56.86		79.631	79.631	184.61	56.86	96.8	46.58	289.66	88.9	125.94	34.734		0.33398	0.46084	0.54246	0.16975	0.66376	0.11631	0.13282		0.31562	1.1135	1.6744	0.11976	0.96002	0.25708	0.34649		1.2487	0.6515	0.68533	0.54395	1.371	0.10667
	73.722	195.3	90.933	90.308	47.857	48	53.889		339.18	59.639	113.94	82.615	45.854	21.613	55.059		70.321	70.321	175.13	55.059	81.489	56.395	284.44	75.001	116.96	41.673		0.31857	0.66213	0.53105	0.34146	1.9449	0.13462	0.23462		0.76742	1.265	0.74338	0.15701	0.83041	0.20595	0.15604		0.7743	0.92508	3.5638	0.59377	2.1419	0.16563
	79.991	162.21	93.083	53.538	54.467	56.935	51.39		277.83	61.246	128.73	77.292	55.348	23.59	53.97		64.563	64.563	156.06	53.97	62.98	77.145	263.04	60.164	105.65	52.185		0.19104	0.42954	0.37454	0.038144	0.82313	0.048374	0.46357		1.3826	0.52063	0.24203	0.10319	0.16511	0.13142	0.38205		0.36028	0.38868	3.9277	0.78638	0.12551	0.30087
	87.005	129.42	88.64	28.382	59.941	68.754	45.94		218.67	63.048	152.43	69.685	66.053	25.827	53.229		62.365	62.365	134.78	53.229	45.809	102.03	233.18	47.008	94.764	63.437		1.0317	0.39942	1.4131	0.76993	0.64949	0.026787	0.30579		2.51	0.78567	0.11767	0.077341	0.66911	0.29089	0.23815		0.66481	0.73815	0.86183	0.65877	0.26838	0.35235
	93.437	105.3	79.192	16.756	65.929	80.969	39.193		171.17	64.372	181.4	61.06	74.824	27.628	52.475		63.731	63.731	118.68	52.475	34.511	124.25	202.58	38.152	87.024	72.591		0.17151	0.28223	1.0942	1.0489	0.2685	0.87559	0.47358		1.851	0.55568	0.60593	0.51933	0.78628	0.1056	0.19712		0.21324	0.43597	0.27972	0.30338	1.1389	0.14776
	97.956	88.308	67.855	13.549	74.079	96.74	32.802		144.81	64.546	212.01	52.682	78.514	28.296	51.347		68.668	68.668	115.17	51.347	30.156	136.99	178.95	36.214	85.165	76.813		0.43036	0.2043	1.6691	0.71388	1.5603	0.88532	0.49055		0.12456	0.50405	1.0478	0.26407	0.17063	0.0813	0.45787		1.3842	0.085523	1.0999	0.44007	0.64249	1.6748
	97.166	72.861	57.745	15.882	86.043	117.72	28.421		150.03	63.658	250.03	43.314	74.344	27.357	49.632		78.016	78.016	124.77	49.632	29.722	136.51	162.39	45.018	92.886	74.497		0.55202	0.63124	0.27173	0.21341	0.17444	0.90326	0.13016		0.92766	0.45249	0.91626	0.42253	1.3516	0.06425	0.50915		1.2597	0.61873	1.1835	0.54495	0.59546	1.8867
	91.954	61.282	51.979	20.88	106.88	139.18	25.445		180.49	62.154	297.89	32.112	64.411	25.275	47.573		91.773	91.773	142.56	47.573	31.601	127.35	147.75	62.818	108.36	67.533		1.5986	1.0182	0.83483	0.80402	0.63827	0.91915	0.17461		1.4484	0.50029	2.0625	0.14342	1.0462	0.03467	0.37326		0.25589	0.25232	0.47653	0.24183	2.0818	0.63301
	87.414	55.897	51.369	25.665	135.48	156.38	22.771		220.57	59.906	346.92	20.933	52.886	22.761	45.485		108.68	108.68	167.73	45.485	34.188	115.13	134.89	83.88	126.05	58.33		0.45571	1.2992	0.17209	0.22381	0.082068	0.23248	0.54447		1.4427	0.53985	1.6583	0.53194	0.83702	0.043735	0.38175		1.1897	0.65491	0.46572	0.31922	0.90237	0.2685
	88.639	59.029	53.838	32.407	164.27	164.57	21.307		254.62	56.782	388.46	11.633	43.937	20.529	43.686		127.46	127.46	199.48	43.686	35.875	105.47	123.65	102.47	140.41	49.294		2.4657	0.29549	0.12203	0.65135	0.74069	0.057287	0.37136		0.70774	0.53446	1.5507	0.097941	0.34525	0.097573	0.91148		0.97225	0.50786	1.4505	0.90017	0.24866	0.080109
	100.72	76.211	58.167	43.024	185.66	161.8	21.961		267.01	52.652	413.86	6.0685	41.734	19.29	42.492		146.86	146.86	236.99	42.492	36.733	104.01	113.87	112.84	145.88	42.835		1.3411	0.31001	0.13233	0.57026	0.95333	0.09354	0.086956		0.68089	0.29965	0.74045	0.16948	0.6008	0.19938	0.36462		0.53245	0.20048	2.3257	1.1965	0.75346	0.25795
	131.2	105.89	63.136	54.261	192.05	151.22	25.64		250.75	45.014	421.17	5.3143	50.313	18.858	42.161		171.4	171.4	293.63	42.161	37.832	114.23	105.22	113.4	137.55	38.215		0.54775	0.092267	0.63056	0.37671	0.51649	0.087616	0.21336		1.9526	0.1449	1.6346	0.33536	0.32652	0.052893	0.20073		1.3503	0.33797	0.41712	1.0249	1.2187	0.22484
	176.68	139.78	67.524	62.865	177.42	135.78	34.639		216.26	33.954	416.16	8.1327	66.892	18.758	42.483		201.9	201.9	369.93	42.483	39.068	132.38	97.814	107.94	119.11	33.828		0.62698	0.04938	0.70752	0.30295	0.076287	0.22517	0.6176		2.1459	0.51709	1.1906	0.151	1.1546	0.18457	0.82272		1.6679	0.40834	2.9428	1.1276	0.97948	0.19628
	225.85	169.56	72.289	65.581	146.84	118.41	48.351		174.03	23.227	401.76	12.912	85.421	19.269	43.07		231.61	231.61	445.86	43.07	40.336	153.23	92.138	98.915	97.954	30.78		1.442	0.95097	0.40541	0.6839	0.13212	0.24599	0.56421		0.42984	0.58885	0.34193	0.35573	0.25834	0.14877	1.016		1.1137	0.14902	1.8611	0.18358	1.7073	0.55197
	267.41	186.96	78.243	58.56	109.33	102.05	63.337		134.53	16.585	380.86	18.04	99.849	20.67	43.534		253.76	253.76	501.37	43.534	41.534	171.55	88.694	88.734	81.457	30.177		0.93821	0.59354	0.34876	0.2725	0.3625	0.21818	0.1674		0.70497	0.49485	0.18992	0.17521	0.57054	0.097282	0.78638		0.64546	0.11011	1.6684	0.42227	0.60966	0.048863
	290.07	188.73	83.953	43.97	73.938	84.565	76.157		108.25	17.782	356.38	21.905	104.13	23.242	43.489		261.59	261.59	516.41	43.489	43.022	182.11	87.982	79.826	77.004	33.124		0.37336	0.81484	1.2051	0.42238	0.2216	0.16056	0.36538		0.11333	0.30276	0.95111	0.29351	0.73054	0.27312	0.62336		0.83781	0.44825	0.41861	0.57048	0.30237	0.11174
	288.93	180.43	87.982	27.587	49.699	64.013	83.372		96.661	28.924	322.71	24.866	93.995	26.973	42.217		249.17	249.17	474.69	42.217	44.872	179.98	87.52	70.985	91.204	40.008		0.1589	1.6565	0.66183	0.31585	0.30116	0.35309	0.84364		0.98958	0.44513	0.064427	0.17807	0.26153	0.5656	0.062747		0.50652	0.17969	0.47184	0.63903	0.39095	0.36898
	271.54	166.87	88.895	15.186	38.758	43.568	82.799		92.777	47.51	277.91	27.998	73.487	31.679	39.978		221	221	389.58	39.978	46.538	168.63	86.975	60.594	119.13	50.094		0.42155	1.6783	0.74168	0.60509	0.73551	0.17542	0.72924		1.0803	0.77801	0.98944	0.12749	0.31557	0.354	0.42688		0.70656	1.2475	1.0307	1.3478	0.53238	0.33211
	245.22	152.89	83.925	12.542	35.09	26.409	76.73		94.383	70.378	230.4	30.762	48.991	37.373	37.845		185.99	185.99	285.51	37.845	47.477	155.48	90.07	50.463	150.88	62.798		0.20388	0.20165	0.033601	0.14137	0.1618	0.26782	0.74309		0.35925	0.65191	0.76266	0.049916	0.56792	0.59182	0.67501		0.077486	1.635	2.1586	1.5701	1.8497	0.18802
	217.27	143.32	74.027	22.624	35.477	15.713	68.441		99.264	94.368	188.57	32.62	26.894	44.069	36.894		153.03	153.03	186.91	36.894	47.144	147.93	100.53	42.399	176.54	77.539		0.74422	0.33024	1.4759	0.063272	0.32946	0.18999	0.37921		1.9662	0.59256	1.5886	0.11596	0.59655	0.72365	0.48032		1.0862	0.94017	0.86396	1.4856	0.7827	0.66102
	195.02	138.67	63.354	41.582	36.701	13.915	61.205		105.2	116.32	160.86	33.033	13.584	51.778	38.198		131.02	131.02	118.21	38.198	44.853	153.39	122.07	38.212	186.19	93.736		1.9908	0.80597	1.0044	0.42451	0.17248	0.23538	0.40532		0.66457	1.3865	0.45514	0.24963	0.66562	0.34098	0.29484		0.22443	0.074282	0.4319	1.3762	1.0004	0.12402
	175.29	135.74	56.061	64.963	35.543	18.897	58.297		109.21	138.74	148.72	31.216	11.065	63.158	42.143		121.21	121.21	83.057	42.143	40.969	179.57	163.55	39.912	174.84	116.16		0.28134	0.91833	0.74296	0.29323	0.91846	0.20181	0.083782		0.49399	0.84841	1.0335	0.075089	1.6788	0.42133	0.89129		0.47848	0.19941	2.2164	0.44315	0.23341	0.47221
	110.99	115.43	47.092	180.38	26.547	183.26	109.27		267.78	52.487	302.12	57.068	116.54	25.96	73.316		181.07	181.07	69.011	73.316	51.506	83.607	157.65	141.81	183.46	40.904		0.24087	0.36978	0.07353	0.34629	0.18028	0.27355	0.17394		0.23213	1.1588	0.37008	0.15028	0.17872	0.48385	0.11625		0.46283	0.1063	0.62841	1.5103	0.085133	0.21637
	99.093	111.95	45.219	187.95	14.634	189.59	92.23		395.2	56.082	302.82	50.84	96.619	25.543	75.369		200.23	200.23	93.432	75.369	57.26	96.205	142.27	149.04	168.58	36.879		0.646	0.43476	0.46378	0.43715	0.76632	0.047557	0.45355		0.5081	0.23991	0.28243	0.53326	0.30077	0.35173	0.59175		1.39	0.14079	1.8191	0.57104	0.76516	0.25792
	87.154	112.07	45.622	195.56	7.5915	186.12	72.211		504.69	60.325	298.8	46.185	77.933	25.065	76.544		214.9	214.9	117.1	76.544	62.647	106.22	131.82	152.87	153.95	33.601		0.10913	0.84606	0.53158	0.51495	0.76039	0.1338	0.21055		1.3224	0.27813	0.79763	0.16395	0.49939	0.086627	1.0129		0.97596	0.23068	1.2399	0.42464	0.32504	0.3373
	78.961	119.31	47.794	203.57	3.7808	167.19	54.127		567.03	62.251	287.33	44.96	63.495	24.622	76.218		217.17	217.17	133.76	76.218	68.851	109.57	132.57	151.69	143.65	31.15		0.80496	0.73571	0.26691	0.43487	1.5439	0.20735	0.46585		0.74225	0.18379	0.64243	0.18725	0.71863	0.21836	0.33251		0.37652	0.62237	1.2138	0.72876	0.46865	0.81203
	74.419	133.35	51.231	208.63	1.5651	135.41	42.888		571.05	61.572	262.3	49	53.054	24.112	73.767		202.88	202.88	142.76	73.767	76.251	102.3	150.9	143.61	138.77	29.088		1.1332	0.1605	0.51292	0.69007	0.40665	0.13159	0.12958		0.58108	0.47488	1.7707	0.2418	0.10321	0.30548	0.27925		1.3366	1.7077	0.59974	1.4997	0.62581	0.23695
	71.005	148.88	55.426	207.41	1.4927	99.252	40.515		536.21	60.266	225.51	57.068	44.601	23.47	69.606		177.29	177.29	148.27	69.606	83.07	87.126	182.67	129.7	136.62	27.359		0.58818	1.0003	0.43597	0.58636	0.15944	0.21333	0.07918		1.5651	0.84178	0.32858	0.13204	0.093888	0.1325	0.17824		1.1918	0.31357	1.2023	0.76252	0.19506	0.71878
	68.861	160.63	62.137	196.54	4.6552	67.204	43.734		479.28	58.764	186.14	66.411	38.514	22.85	64.671		146.65	146.65	151.27	64.671	87.527	69.989	218.26	112.8	135.52	26.624		0.28522	1.7727	1.6707	0.80304	0.11007	0.055668	0.24785		0.15194	1.0041	0.7051	0.12474	0.82134	0.084577	0.10273		1.2308	0.43168	0.77966	0.40373	1.3176	0.3961
	68.128	163.3	71.702	170.15	10.23	47.753	49.513		417.06	57.494	153.38	74.275	35.17	22.407	59.9		117.21	117.21	152.73	59.9	87.845	56.812	248.04	95.758	133.79	27.542		0.39738	0.14437	0.17617	0.44129	1.9446	1.22	0.13539		1.608	0.30229	0.38716	0.10065	0.24143	0.14447	0.04244		0.62641	0.31817	1.3059	0.42208	0.99632	0.29001
	68.95	153.97	81.483	130.47	17.394	43.045	54.823		366.33	56.887	136.41	77.907	34.945	22.297	56.229		95.2	95.2	153.62	56.229	82.144	53.526	262.4	81.41	129.77	30.773		0.60416	0.54658	0.11782	0.17144	0.16896	0.53015	0.30407		1.7611	0.56972	1.0577	0.16267	0.52679	0.039745	0.30903		1.6118	0.27717	1.1709	1.0931	0.58348	0.72147
	71.57	136.17	88.843	86.321	25.325	47.421	56.631		321.91	57.214	137.66	76.584	40.346	22.766	53.799		79.904	79.904	151.8	53.799	71.611	64.515	256.72	67.864	121.2	38.339		0.73722	0.50814	0.57862	0.15723	0.86484	0.29315	0.027053		2.0021	0.53873	0.61964	1.1399	0.44949	0.18979	0.33981		0.26573	0.7418	0.82041	0.3885	3.2104	0.24417
	75.893	114.29	91.145	46.528	33.049	57.665	54.13		272.64	58.19	151	72.139	51.121	23.712	51.985		67.156	67.156	146.61	51.985	59.063	85.827	237.41	53.227	109.2	49.8		0.57001	1.0127	0.049893	0.10096	0.14102	0.081564	0.90275		0.54644	0.42229	0.99314	0.83124	0.11446	0.26084	0.51189		0.3223	0.48783	1.5698	0.48765	2.4923	0.19636
	81.554	92.689	85.938	19.912	41.115	70.561	49.341		226.24	59.405	172.79	65.661	63.511	24.764	50.577		58.046	58.046	141.29	50.577	47.318	110.88	211.41	40.338	97.143	62.123		0.45794	0.4633	0.55258	1.1618	0.84649	0.57613	0.073465		0.36816	0.77351	0.13428	0.53052	0.54926	0.051059	0.35407		0.97288	0.67455	2.0692	0.69122	0.30912	0.2317
	88.185	75.764	74.982	8.5903	50.983	82.891	43.475		190.44	60.452	199.4	58.236	73.757	25.55	49.363		53.663	53.663	139.07	49.363	39.192	133.11	185.63	32.035	88.393	72.274		1.0716	0.5396	0.13294	1.1903	0.16673	0.25438	0.4955		1.4891	0.40636	0.39217	0.44893	0.67864	0.10356	0.36208		0.36868	0.59684	0.17273	0.47985	0.74623	0.30514
	95.418	61.848	61.95	6.6815	64.114	97.362	37.743		172.99	60.923	227.16	50.954	78.1	25.702	48.133		55.098	55.098	143.17	48.133	35.309	145.91	167.02	31.156	86.318	77.221		1.3793	0.43161	0.48332	0.030833	0.43921	0.70904	0.081013		0.46452	0.19048	0.28194	0.079469	0.30957	0.27561	0.55899		0.12708	1.0583	0.17892	0.2577	1.5472	0.48959
	103.34	48.021	50.516	11.009	81.969	116.12	33.356		184.33	61.175	261.54	42.69	73.424	24.961	46.883		63.642	63.642	152.55	46.883	33.793	145.44	156.68	41.892	94.6	75.339		0.75945	0.5635	1.3137	0.73576	0.41661	0.26305	0.19693		2.6106	0.11495	0.82053	0.18218	0.95315	0.21986	0.79978		0.33864	0.41396	0.13704	0.13601	0.73316	0.40192
	112.2	36.777	44.352	18.396	111.42	135.1	29.287		219.31	61.479	304.97	32.718	62.234	23.574	45.752		78.569	78.569	165.03	45.752	33.705	136.07	150.01	62.352	110.99	68.651		1.7975	0.71914	0.034669	1.2341	0.93634	0.43396	0.14759		3.3271	0.28139	0.14798	0.27297	0.20214	0.53932	0.5699		1.7624	1.6765	0.33176	0.31254	0.73258	0.75247
	121.86	30.61	44.796	25.666	151.5	150.25	24.727		262.25	61.3	349.26	22.725	49.206	21.928	44.747		97.941	97.941	182.22	44.747	34.11	123.61	145.31	86.248	129.97	59.592		0.62394	0.35839	0.23464	0.51748	0.77381	0.22609	0.097491		2.182	0.2475	0.48497	0.39472	0.49185	0.37986	0.29173		0.40851	0.43206	0.89446	0.2603	0.64922	0.64977
	132.2	32.015	49.398	35.451	191.9	157.51	21.219		297.45	60.103	386.24	14.397	39.013	20.409	43.875		119.82	119.82	205.72	43.875	34.072	113.85	140.93	107.29	146.03	50.6		2.0111	0.6448	0.23919	0.79748	1.2391	0.3352	0.19808		1.0902	0.21413	0.4146	0.25951	0.10427	0.31819	0.42009		1.0013	0.72152	1.0232	0.65182	0.21704	0.42741
	143.08	45.041	56.154	49.87	222.29	155.31	20.305		309.24	57.353	407.72	9.4194	36.332	19.404	43.143		142.27	142.27	237.13	43.143	33.574	112.6	135.17	119.2	153.63	44.111		0.20772	0.36006	0.083689	0.21307	0.10448	0.31462	0.16687		0.83976	0.44067	0.39788	0.093636	0.27062	0.60084	0.43092		0.53197	0.83565	0.40913	0.81899	2.0051	0.72843
	155.24	68.026	63.06	64.973	232.36	146.36	23.527		289.85	50.628	411.2	8.7545	45.24	18.576	42.662		169.78	169.78	289.08	42.662	33.241	123.71	126.53	120.24	148.81	39.432		0.22108	0.41944	0.57833	0.21726	0.6933	0.21701	0.11192		0.97281	0.48516	0.40998	0.075279	0.31371	0.46373	0.40868		0.31699	0.35611	0.75386	1.165	1.131	0.39104
	168.79	94.894	68.115	76.812	214.19	133.01	33.725		249.73	40.285	402.13	11.278	62.622	17.667	42.429		203.65	203.65	360.51	42.429	33.096	143.33	116.12	114.58	135.23	34.938		0.19351	0.28411	0.37162	0.14595	0.10426	0.24667	0.54883		0.1591	0.86161	0.82654	0.13779	0.42895	0.83597	0.38		0.084091	0.51519	0.29982	0.37662	2.8355	0.18636
	182.59	119.57	71.55	81.438	174.65	117.59	49.872		200.54	29.956	384.28	15.547	82.358	17.183	42.274		237.14	237.14	432.46	42.274	33.165	165.66	106.22	104.85	118.87	31.669		0.33342	0.27863	0.39392	0.6469	0.16345	0.052376	0.45299		0.48539	1.2152	0.68409	0.085896	0.69989	0.68658	0.7952		0.45009	0.5933	1.2683	0.63632	0.30105	0.31254
	195.53	135.99	74.701	74.69	125.64	102.46	67.706		153.92	23.273	361.37	20.12	98.332	17.629	42.028		263.48	263.48	485.97	42.028	33.472	184.88	99.098	93.658	105.71	30.665		1.5284	1.2046	1.4159	0.82783	0.55669	0.067351	0.75059		0.37132	1.6544	0.31335	0.095867	0.4649	0.51485	0.25623		0.79186	0.13946	1.9825	0.85867	1.8828	0.23811
	206.47	142.26	77.219	59.202	79.027	85.393	82.966		121.54	23.868	337.16	23.552	104.42	19.512	41.523		275.94	275.94	502.07	41.523	34.202	195.22	97.036	83.62	101.72	32.965		0.43422	0.44809	1.3492	0.8559	0.2855	0.094999	0.23061		0.52624	0.80103	1.1782	0.045881	0.6385	0.20952	0.79404		0.12672	0.41658	2.4305	0.44915	0.78126	0.19687
	217.54	142.44	78.753	41.213	46.695	64.822	91.391		104.59	33.564	307.21	26.214	96.748	22.928	39.848		269.7	269.7	466.73	39.848	35.339	191.68	97.302	73.168	111.86	38.805		0.51189	0.68363	0.90846	0.13408	0.18855	0.37236	0.58459		0.56874	0.51789	0.95299	0.1654	0.46325	0.18596	0.45727		0.46067	0.59354	1.7596	0.74019	0.59001	0.031557
	229.5	139.34	78.952	26.964	30.744	44.081	90.412		95.304	49.942	269.03	29.068	79.382	27.539	37.117		249.26	249.26	392.6	37.117	36.605	178.15	98.378	60.56	132.17	47.492		0.062821	1.743	0.67466	0.5838	0.14671	0.13252	0.071253		0.45164	0.2794	0.19872	0.13439	0.34935	0.081058	0.18109		0.41532	0.15305	0.51321	0.52899	0.15196	0.11444
	239.15	135.79	76.053	22.695	23.254	26.504	82.869		91.88	70.264	229.27	31.56	58.157	33.201	34.694		221.83	221.83	300.72	34.694	37.723	162.07	104.36	48.146	155.18	58.672		0.46686	1.4458	0.8584	0.49212	1.9706	0.29828	0.71052		0.41917	0.31374	2.1836	0.14228	0.97554	0.17424	0.72616		0.97571	0.44513	1.4085	0.36315	0.91287	0.22868
	243.3	134.62	70.288	31.456	21.075	15.422	72.617		92.516	91.792	194.57	33.133	38.904	39.77	33.941		194.65	194.65	212.13	33.941	38.415	150.91	119.35	38.276	173.42	71.99		0.86428	1.1112	0.86633	0.46475	1.0718	0.47687	0.12176		0.40386	0.51628	2.666	0.20606	0.11289	0.095106	0.31587		0.16991	0.79151	0.48334	0.58003	1.7271	0.20093
	238.78	137.06	64.304	49.085	21.057	13.121	63.511		95.408	111.79	171.58	33.233	27.454	47.102	36.222		174.92	174.92	147.87	36.222	38.643	152.1	147.44	33.303	179.43	87.092		0.45956	0.68234	0.69895	0.68774	0.89272	0.35469	0.84864		0.91994	0.33359	0.48877	0.10792	0.17099	0.37278	0.53875		0.51292	0.25173	0.74624	0.22115	1.289	0.19418
	219.59	141.24	60.748	71.011	20.05	17.378	59.404		98.133	132.71	161.99	30.914	25.6	57.531	42.864		162.36	162.36	108.98	42.864	38.592	172.43	200.36	35.627	169.5	108.49		0.41617	0.78133	1.4811	1.0645	0.44995	0.53894	0.15794		1.0955	1.2567	1.324	0.22125	0.52932	0.14251	0.21554		0.73611	1.6693	0.8432	1.0443	2.0412	0.19813
	187.85	145.28	62.265	92.659	17.802	24.768	62.699		101.89	156.39	161.37	26.546	29.456	71.154	52.956		152.15	152.15	81.428	52.956	38.319	206.92	275.39	43.682	148.59	136.42		0.64621	0.5789	0.42287	0.63645	0.25848	0.89096	0.38108		2.4315	0.58333	0.090406	0.17702	0.95887	0.18771	0.36909		0.59994	0.77265	0.37907	0.87182	0.92284	0.71614
	152.56	147.35	71.373	109.46	16.414	31.862	70.828		110.32	179.13	167.18	21.548	36.33	84.468	64.511		144.73	144.73	63.663	64.511	37.881	245.41	354.92	53.865	122.28	164.11		0.25223	0.35477	2.197	0.33712	0.8239	1.2926	0.96334		1.7037	0.61651	0.63533	0.41296	0.82916	0.15013	0.30878		0.3243	0.39008	0.29206	0.09863	1.9812	2.0343
	122.68	145.57	86.308	121.86	16.263	35.236	80.185		127.06	197.25	176.88	17.34	43.531	93.974	75.538		140.54	140.54	54.125	75.538	37.337	277.78	421.36	62.57	96.178	184.8		1.4604	0.28462	0.90346	0.34415	0.57582	0.59345	0.42792		1.9297	0.53902	0.3147	0.80909	0.17542	0.18267	0.18097		0.62933	0.721	0.52108	0.32097	2.4367	0.55557
	107.19	137.48	103.29	132.91	17.725	33.91	87.167		155.74	207.06	187.92	15.34	48.369	96.172	84.049		140.03	140.03	51.256	84.049	36.507	293.85	457.09	66.193	75.852	191.72		0.62404	1.7845	0.49138	0.57793	0.24065	0.30391	0.54643		0.41035	0.38372	0.3525	0.40585	0.78061	0.28865	0.21186		0.40554	0.23225	0.70526	0.69523	0.31558	0.43996
	111.82	124.3	118.55	141.93	21.177	30.169	88.17		207.5	207.4	202.57	16.018	51.233	87.811	90.436		146.53	146.53	59.574	90.436	35.351	285.25	454.22	61.841	59.864	179.6		0.80418	1.0759	1.2149	0.060192	0.66054	0.35984	0.53633		0.18547	0.33362	0.44898	0.16897	0.39903	0.20536	0.57362		1.0688	1.1828	0.32235	0.09104	0.95838	0.27034
	89.159	171.91	77.634	111.36	154.8	118.57	103.09		91.405	86.679	318.91	61.504	146.75	23.43	55.679		165.18	165.18	74.291	55.679	26.929	106.64	175.36	104.64	161.64	65.369		1.1381	0.27316	0.25831	0.85989	0.47144	0.35328	0.34609		0.71588	0.89246	0.51408	0.16014	0.40817	0.2502	0.29442		0.11244	0.30942	0.42904	0.49041	1.4039	0.15971
	116.64	151.52	68.421	120.62	116.63	129.21	114.7		92.88	65.72	329.06	58.861	140.63	25.358	59.52		158.91	158.91	54.149	59.52	28.859	110.19	173.33	113.66	182.41	59.282		0.94267	0.38812	0.74761	0.70718	0.34765	0.25758	0.33277		0.998	0.11409	1.4084	0.087167	0.47931	0.16028	0.29862		0.44238	0.53786	0.50536	1.383	1.5891	0.07165
	132.28	142.8	61.027	129.86	81.35	141.26	122.55		114.19	52.139	335.08	55.978	132.98	26.501	62.821		160.33	160.33	45.715	62.821	34.74	110.53	170.96	120.72	192.88	53.865		1.1092	0.3955	0.45853	0.32727	0.36346	0.17698	0.10364		1.1499	0.66443	2.2296	0.099355	0.12525	0.30622	0.54816		0.16848	0.64486	0.98741	0.73776	0.24781	0.7359
	133.12	140.44	55.223	139.02	53.956	155.03	124		168.78	47.974	337.41	52.043	122.62	26.602	65.974		176.25	176.25	53.667	65.974	44.333	107.69	166.2	126.64	189.76	48.64		0.33625	0.86675	0.64331	0.26067	0.077096	0.90512	0.19049		1.3472	0.27171	1.3068	0.086499	0.80654	0.5729	0.20617		0.16016	0.76172	1.0759	0.066603	0.27786	0.27156
	124.64	141.28	50.78	148.03	35.206	167.15	115.91		250.96	50.177	336.88	46.998	109.28	25.993	69.343		205.49	205.49	73.61	69.343	55.286	104.67	158.02	132.22	177.47	42.713		0.7157	0.78898	0.7375	0.2827	0.36195	1.003	0.19191		0.20128	0.21335	0.85611	0.12206	1.3385	0.32501	0.15683		0.39175	1.033	0.87163	0.33894	0.37098	0.19778
	111.3	142.13	47.614	156.84	21.776	174.24	100.07		340.57	55.691	332.82	42.057	94.723	25.062	72.343		237.85	237.85	98.529	72.343	65.248	101.44	149.49	136.22	160.97	36.797		0.60759	1.6893	0.086943	1.3029	0.61492	0.4886	0.61442		0.76727	0.30024	0.23972	0.10269	0.76385	0.36487	0.32392		0.8326	0.11396	1.8939	0.1477	0.59878	0.3352
	97.553	139.82	45.876	168.8	12.523	172.91	81.147		417.44	61.455	324.53	38.435	80.711	24.193	74.39		263.17	263.17	121.41	74.39	71.87	97.965	143.7	137.42	145.17	31.609		0.18456	2.4925	0.26654	0.90539	0.63011	0.34606	0.13621		1.9828	0.17495	0.56215	0.14555	0.83244	0.49497	0.42039		0.34347	0.6905	0.60881	0.14126	0.98855	0.59684
	87.846	134.1	45.695	183.95	6.3051	158.37	63.827		461.43	64.413	311.33	37.349	69.011	23.773	74.896		271.25	271.25	135.24	74.896	74.751	94.194	143.74	134.59	135.03	27.864		0.32369	1.0316	0.15385	0.44992	0.2886	0.18172	0.20738		1.9576	0.43988	0.66194	0.28892	0.22228	0.60176	0.68206		0.4934	0.092516	0.33796	0.97026	0.31508	0.27035
	81.928	127.07	47.2	197.26	1.9799	132.88	52.788		464.37	64.223	288.17	40.096	58.802	23.969	73.364		256.91	256.91	136.87	73.364	75.459	88.365	153.22	126.06	132.27	25.168		0.55277	0.21253	0.49579	0.35425	0.45552	0.32602	0.35594		0.71884	0.39799	1.5547	0.26607	0.15246	0.89525	0.50688		0.46487	0.15138	0.75327	0.2425	1.5112	0.25409
	76.831	119.14	50.519	203.71	-0.21207	103.62	49.777		439.72	62.924	255.52	45.866	48.908	24.525	70.184		226.92	226.92	130.99	70.184	74.592	80.502	170.08	112.65	133.6	23.045		0.23532	0.40136	0.6964	0.57916	0.1089	0.48561	0.22306		1.4179	0.16959	1.2551	0.12388	0.64417	0.49683	0.21766		0.94022	0.83475	0.795	1.0641	0.33378	0.41986
	72.936	110.68	57.825	198.27	0.49061	77.789	51.675		399.69	61.028	220.94	52.712	40.559	25.188	66.104		189.09	189.09	122.3	66.104	72.751	73.259	188.91	96.865	136.43	22.084		0.30404	0.56093	0.9003	0.3282	0.68384	0.62388	0.2536		1.4333	0.56261	0.57704	0.4801	0.48111	0.4887	0.39381		0.66255	0.40614	2.0338	0.53615	0.34925	0.57313
	70.619	102.09	69.032	174.73	3.7273	62.577	55.859		356.5	59.046	191.99	58.684	34.984	25.706	61.872		151.21	151.21	115.52	61.872	70.534	69.285	204.27	81.194	138.15	22.876		0.36844	0.62419	0.62571	1.7779	0.29102	0.2064	0.55576		1.801	0.82576	0.49655	0.28875	0.090949	0.22249	0.66892		0.90036	0.16096	3.9329	0.45861	1.3528	0.025415
	70.26	93.063	80.881	136.43	9.1376	60.217	59.71		322.37	57.49	176.25	61.834	33.413	25.828	58.236		121.08	121.08	115.36	58.236	67.583	71.231	210.74	68.138	136.14	26.009		2.3831	0.28575	0.29798	1.0504	1.1687	0.24142	0.87724		0.50896	0.28536	0.13714	0.087112	0.22174	0.031488	0.14374		0.080141	0.25265	0.95715	0.58557	0.39392	0.16757
	71.563	83.349	90.113	92.709	16.361	65.915	60.605		293.39	56.117	175.94	61.871	38.528	25.434	55.02		96.396	96.396	123.64	55.02	63.499	82.517	204.94	55.84	127.61	33.465		0.97681	0.31585	0.26075	1.0035	1.0371	0.14741	0.51976		0.26347	0.75058	0.61138	0.13418	0.20091	0.073142	0.57779		0.52646	0.19148	1.4266	1.0992	0.33997	0.61959
	74.275	73.391	93.47	52.865	24.525	76.321	57.9		261.4	54.587	186.01	60.094	49.508	24.69	51.725		71.965	71.965	137.23	51.725	58.818	101.38	190.48	42.634	114.28	44.849		0.38243	0.45027	0.075081	1.5682	0.42837	0.14694	0.2999		0.40778	0.3179	0.66348	0.25027	0.27716	0.19777	0.9071		0.5037	0.33865	0.62665	0.43657	0.75214	0.53818
	78.84	63.636	88.232	26.215	33.869	88.084	53.343		232.28	53.263	203.13	56.94	62.331	23.778	48.616		51.233	51.233	153.38	48.616	54.081	122.68	172.44	31.307	100.38	57.192		0.3464	0.6598	0.40869	0.20022	0.56826	0.13876	0.26035		0.6329	0.46125	1.5555	0.71407	0.10968	0.30178	0.57843		0.047278	0.98705	0.08859	0.53789	0.97551	0.21116
	85.704	54.53	76.571	14.383	45.704	97.854	47.9		211.93	52.509	223.97	52.846	72.978	22.879	45.955		37.65	37.65	169.35	45.955	49.825	141.29	155.9	24.646	90.112	67.524		0.39631	0.34051	0.34026	0.71253	0.5417	0.60308	0.53969		0.83123	0.42227	0.46316	0.45722	0.92801	0.064973	0.75926		0.84992	1.6218	0.85289	0.58481	1.3143	0.55003
	95.311	44.404	62.567	11.161	61.336	107.07	42.538		206.22	52.69	245.23	48.249	77.425	22.176	44.005		34.663	34.663	182.42	44.005	45.944	152.09	145.92	25.437	87.699	72.875		1.2253	0.3705	0.25753	2.3289	0.53977	0.21143	0.31946		0.65348	0.78399	0.53984	0.11728	0.40836	0.10389	0.25399		0.40632	0.95656	0.19126	0.65202	0.65872	0.81798
	110.87	32.96	50.3	14.112	82.074	117.98	38.224		225.1	54.799	271.4	42.127	72.535	21.766	43.035		45.227	45.227	189.11	43.035	42.077	151.58	144.93	38.1	96.893	71.802		0.5051	0.44262	0.42911	0.166	0.20557	1.2226	0.28436		1.5009	0.79701	0.47354	0.48691	0.58202	0.11504	0.24824		0.037875	0.26396	0.52914	0.4903	0.28988	0.68767
	132.09	22.703	43.852	20.8	115.73	128.4	33.809		264.62	58.59	304.72	34.189	60.989	21.53	42.867		67.04	67.04	191.26	42.867	38.387	143.17	149.56	60.777	114.88	66.285		1.4934	0.73318	0.37171	0.16425	0.33126	0.82378	0.57026		0.59152	0.26262	0.3274	0.3018	0.68648	0.09805	0.27104		0.41847	0.90106	0.71749	0.24628	1.5024	0.99937
	154.15	16.134	44.875	28.79	161.42	136.18	28.649		309.91	62.578	338.4	25.968	47.494	21.318	43.102		95.675	95.675	194.05	43.102	35.034	132.11	156.15	86.839	136.04	58.488		0.64909	0.52648	1.1009	0.024879	0.12138	0.41095	0.17142		1.9579	0.20021	0.90642	0.25844	0.21919	0.075967	0.26072		0.56582	0.50688	0.93	0.042999	0.56471	0.26459
	172.24	15.758	50.647	41.512	207.44	139.14	24.466		346.05	65.275	365.66	18.996	36.759	20.98	43.339		126.7	126.7	202.68	43.339	32.18	123.66	161.09	109.66	154.73	50.579		1.2556	1.5939	0.75483	1.4452	0.86686	0.23748	0.11668		3.0024	0.094746	0.50059	0.3049	0.47089	0.35203	0.72139		0.10722	0.35607	3.0236	0.22105	0.69138	0.46069
	181.53	23.982	58.691	60.59	242.08	136.44	22.982		358.16	65.191	379.72	14.804	33.493	20.369	43.18		155.7	155.7	222.35	43.18	29.816	123.07	160.73	122.61	165.33	44.722		0.54486	0.32833	0.85087	0.72261	0.46233	0.51383	0.22082		1.1903	0.15882	1.0298	0.31267	0.79307	0.5233	0.54062		1.4736	0.38008	0.60022	0.037109	1.009	0.3421
	176.62	39.137	66.529	80.879	253.64	129.53	25.921		338.27	60.041	377.61	14.139	41.185	18.811	42.596		186.31	186.31	263.74	42.596	27.837	134.09	151.51	123.75	165.17	40.249		0.74154	0.39702	0.43839	0.25703	0.89029	0.38949	0.19063		0.47356	0.054725	0.34237	0.31553	0.4413	0.67792	0.28777		0.28771	0.77613	0.47131	0.19128	0.79649	0.26873
	160.71	57.612	71.683	97.233	233.05	119.67	36.244		296.29	50.817	363.87	15.978	56.696	16.408	41.854		221.48	221.48	323.39	41.854	26.252	153.23	135.85	117.52	157.99	35.715		0.72055	0.11735	0.43491	0.11932	0.34635	0.19745	0.0886		0.43809	0.40379	1.786	0.25815	0.4459	0.39604	0.2734		1.0671	0.2881	0.37293	0.21347	0.65151	0.1619
	141.93	75.796	73.872	104.51	188.14	108.14	52.802		244.2	40.948	342.92	19.204	74.792	14.165	40.995		255.74	255.74	385.27	40.995	25.073	174.84	119.1	106.8	147.81	32.125		0.5685	1.2376	0.89173	0.32625	0.25748	0.40447	0.21504		0.47539	0.50144	0.54198	0.54402	0.23859	0.31255	0.59577		0.54888	0.20529	0.12967	0.68725	0.64306	0.40957
	128.4	90.078	74.75	98.313	132.47	96.204	71.153		193.95	33.864	319.22	22.701	90.238	13.09	40.061		283.64	283.64	433.34	40.061	24.311	193.29	106.62	94.481	138.65	30.483		0.56012	1.0086	0.33092	0.24889	0.18467	0.14362	0.24631		1.3357	0.55153	1.3424	0.32208	0.30937	0.50803	0.53718		0.27407	0.67087	0.64935	0.92875	0.35036	0.17774
	128.24	99.92	74.736	82.079	79.604	82.018	86.854		157.52	32.995	297.2	25.35	97.8	14.189	39.093		299.69	299.69	451.56	39.093	23.821	202.93	103.77	83.46	134.51	31.792		0.26576	1.0037	0.078808	0.92679	0.098496	0.057993	0.79037		0.35285	0.34093	1.2953	0.29767	0.2577	0.64841	0.41281		0.093358	0.42673	0.54506	0.58898	0.091999	0.24623
	149.83	107.73	74.246	62.391	43.108	64.732	95.462		135.23	39.628	274.11	27.554	94.726	18.054	36.868		300.94	300.94	430.64	36.868	23.593	199.61	108.23	71.969	137.87	36.231		0.589	0.88161	0.073939	0.25676	0.71759	0.43045	0.45082		0.53869	0.28874	0.5472	0.15457	0.61514	0.39525	0.30093		0.31312	0.56398	0.70539	1.0784	0.86651	0.42458
	187.77	114.31	73.7	45.832	25.136	47.121	94.331		119.13	51.475	246.99	30.057	84.507	24.012	33.358		291.02	291.02	381.27	33.358	23.849	187.1	116.45	58.079	146.05	43.13		0.33236	0.99986	0.53765	0.40012	0.34602	0.59197	0.41139		2.1551	0.31066	0.85638	0.061488	0.59047	0.47914	0.25046		0.44662	0.8459	0.10103	0.3939	0.56313	0.14093
	229.47	120.48	72.055	38.986	16.642	31.957	86.422		108.69	66.607	219.98	32.258	71.269	31.179	30.398		274.4	274.4	317.39	30.398	24.807	171.61	131.88	44.441	155.35	52.223		1.0056	0.34232	1.3099	1.1715	0.47806	0.26801	0.49181		0.53387	0.4112	1.9942	0.089551	0.50454	0.60339	0.51666		1.3125	0.44915	0.15955	0.79491	0.45557	0.14104
	262.36	127.03	69.034	44.659	14.4	22.011	75.705		103.38	83.095	197.2	33.554	59.137	38.669	29.824		255.53	255.53	252.95	29.824	26.686	159.35	157.98	33.705	162.05	63.242		0.43047	0.47725	1.3735	0.33142	0.026282	0.35491	0.070201		1.6486	1.5706	0.046364	0.20731	0.20146	0.71379	0.36056		0.60184	0.19407	1.8316	0.52215	0.27524	0.20584
	273.86	135.82	66.197	58.461	15.179	18.899	66.15		102.71	99.008	182.81	33.344	52.238	45.597	33.472		238.86	238.86	201.9	33.472	30.426	156.54	198.2	28.52	162.43	75.92		0.72786	0.14342	0.78264	0.21028	0.37135	0.26398	0.81204		2.1281	0.67173	0.78122	0.12331	0.3061	0.65197	0.15376		0.27146	0.78004	0.41136	0.52064	0.35602	0.60568
	255.58	146.32	65.109	76.185	15.75	20.77	61.726		106.01	116.66	178.89	30.467	51.775	53.329	43.8		221.95	221.95	161.39	43.8	35.879	168.18	268.14	31.56	154.49	93.765		1.0907	0.32845	0.24623	0.65202	0.23961	0.2691	0.92903		3.18	0.29583	0.83509	0.19698	0.43637	0.57442	0.28102		0.44325	0.28096	2.2458	0.51084	0.53823	1.1626
	215.9	155.74	67.331	93.622	16.648	25.205	64.983		113.65	137.35	182.68	25.325	54.996	62.454	59.585		201.81	201.81	122.13	59.585	41.639	190.14	365.48	41.059	140.7	116.95		1.313	0.43363	0.32577	0.30521	0.62077	0.21172	0.084986		2.4225	0.8018	1.0833	0.10047	0.99537	0.33214	0.60727		0.30668	0.77102	0.54759	0.65902	0.56993	0.27943
	167.42	161.3	74.427	106.57	20.027	29.786	73.275		126.57	157.58	191.05	19.658	60.099	70.926	77.139		182.14	182.14	88.375	77.139	46.296	214.89	466.86	53.005	124.07	140.23		0.59794	0.14518	0.38089	0.66532	0.68574	0.26021	0.17304		1.0909	0.6239	1.6134	0.11761	0.80196	0.20468	0.24404		0.17402	1.0556	0.23028	0.20214	1.0057	0.35816
	122.7	160.23	85.356	114.72	25.084	32.09	82.777		145.75	173.9	200.84	15.209	65.279	76.695	92.769		166.63	166.63	64.405	92.769	48.443	234.94	548.88	63.39	107.62	158.32		0.55888	0.86915	0.46561	0.4744	0.074173	0.30609	0.35511		0.57985	0.60777	1.1214	0.12764	0.39678	0.20474	0.46134		0.2678	1.2227	0.046858	0.13858	0.39485	0.29939
	94.338	148.03	97.772	120.88	31.015	31.722	89.666		172.16	182.82	208.93	13.719	68.734	77.715	102.79		158.95	158.95	54.483	102.79	46.848	242.76	588.18	68.204	94.339	165.97		1.1393	1.3989	1.0133	0.27922	0.36563	0.14621	0.43771		0.38688	0.36524	0.54129	0.11953	0.56835	0.074634	0.65403		0.37528	0.45805	0.76605	0.26086	0.51793	0.91704
	85.896	126.55	109.33	125.51	37.016	30.294	90.119		214.94	183.22	213.29	16.124	70.985	71.868	106.23		162.79	162.79	65.249	106.23	42.449	231.03	571.75	64.434	83.457	159.77		0.20351	0.45748	0.79325	0.70744	0.1835	0.12738	0.29315		0.60676	0.55332	0.91257	0.13237	0.32758	0.49905	0.49433		0.41922	0.4948	0.17747	0.62281	1.0259	0.4156
	51.298	90.309	61.227	33.118	131.65	164.59	25.094		213.04	56.335	362.64	10.902	53.919	21.838	42.021		162.98	162.98	177.31	42.021	37.477	98.936	106.92	92.958	137.86	45.345		1.4563	1.6803	1.2535	0.28686	0.11243	0.15313	0.20972		0.67768	0.59315	0.85255	0.18409	0.90852	0.45692	0.48944		0.17633	0.27942	0.5777	0.70985	0.68012	0.1827
	66.678	179.93	60.987	206.39	12.53	93.804	32.064		585.27	61.527	202.07	61.692	43.266	22.984	68.117		143.87	143.87	165.1	68.117	92.056	91.263	188.17	139.59	142.49	31.748		0.20927	0.65221	1.9143	0.73364	0.34326	0.19799	0.13189		0.41054	0.76382	0.6727	0.11316	0.35228	0.068747	0.36777		1.1829	0.67298	1.7793	1.357	0.58899	0.38323
	66.439	213.59	66.917	193.6	19.868	65.744	36.947		522.24	60.232	161.82	71.963	40.156	21.694	63.895		118.9	118.9	176.27	63.895	101.79	69.968	233.03	121.88	137.47	31.06		0.41017	0.24618	1.0772	0.42334	0.044433	0.83489	0.077392		1.63	0.2783	0.82038	0.45762	0.15695	0.131	0.19298		0.16354	0.20766	0.96434	0.13442	0.15041	0.38219
	67.398	228.92	75.471	168.01	29.234	48.735	44.443		452.14	59.245	128.46	80.555	39.519	20.775	59.885		95.823	95.823	183.35	59.885	104.38	52.616	270.81	103.95	132.17	31.827		1.0783	0.64239	0.66091	0.27555	0.20659	0.69534	0.092019		1.2837	1.1939	2.1656	0.44415	0.67049	0.08183	0.077176		0.85036	0.83088	0.49984	0.41465	1.0734	0.31006
	69.53	220.33	84.27	131.02	39.08	44.438	51.205		393.23	58.898	111.69	84.387	40.719	20.593	56.86		79.631	79.631	184.61	56.86	96.8	46.58	289.66	88.9	125.94	34.734		0.34605	0.8791	0.31775	0.43647	0.21168	0.2502	0.086392		0.62997	0.25861	0.69852	0.19941	0.42381	0.16688	0.08002		0.53784	0.2834	0.17527	0.38498	0.81804	0.077395
	73.722	195.3	90.933	90.308	47.857	48	53.889		339.18	59.639	113.94	82.615	45.854	21.613	55.059		70.321	70.321	175.13	55.059	81.489	56.395	284.44	75.001	116.96	41.673		0.22753	1.3582	0.3364	1.9266	0.76404	0.23894	0.055249		0.74334	0.26145	0.28193	0.29294	0.88609	0.32912	0.56917		0.49977	1.2347	1.1279	0.53558	1.6513	0.31039
	79.991	162.21	93.083	53.538	54.467	56.935	51.39		277.83	61.246	128.73	77.292	55.348	23.59	53.97		64.563	64.563	156.06	53.97	62.98	77.145	263.04	60.164	105.65	52.185		0.55614	0.67214	0.74712	2.3019	0.65427	0.10614	0.28592		1.1371	0.025446	0.76812	0.20944	0.44762	0.99094	0.29513		0.51468	0.62034	1.3782	1.084	0.18069	0.25896
	87.005	129.42	88.64	28.382	59.941	68.754	45.94		218.67	63.048	152.43	69.685	66.053	25.827	53.229		62.365	62.365	134.78	53.229	45.809	102.03	233.18	47.008	94.764	63.437		1.3477	0.16018	0.3435	0.67071	0.30841	0.22504	0.42104		1.0175	0.35259	0.24523	0.34267	0.28356	0.56049	0.25349		0.64681	0.46191	0.079993	0.66073	0.98299	0.074212
	93.437	105.3	79.192	16.756	65.929	80.969	39.193		171.17	64.372	181.4	61.06	74.824	27.628	52.475		63.731	63.731	118.68	52.475	34.511	124.25	202.58	38.152	87.024	72.591		0.71259	0.69331	0.79572	0.1491	0.84806	0.48546	0.31213		0.77796	0.65254	0.14158	0.29748	1.2931	0.6152	0.40023		0.30967	0.16339	1.038	0.13655	0.48972	0.45281
	97.956	88.308	67.855	13.549	74.079	96.74	32.802		144.81	64.546	212.01	52.682	78.514	28.296	51.347		68.668	68.668	115.17	51.347	30.156	136.99	178.95	36.214	85.165	76.813		0.22943	1.7396	1.4126	0.41105	0.34281	0.41189	0.28651		0.85555	0.6703	0.069989	0.56174	0.78877	0.52959	0.35445		1.1199	0.033652	0.35979	0.1753	1.634	0.65788
	97.166	72.861	57.745	15.882	86.043	117.72	28.421		150.03	63.658	250.03	43.314	74.344	27.357	49.632		78.016	78.016	124.77	49.632	29.722	136.51	162.39	45.018	92.886	74.497		0.53674	2.014	1.2688	0.25844	0.41355	0.3289	0.10065		0.52164	0.26174	0.22385	1.0176	0.35619	0.53986	0.24268		0.38121	0.19214	0.90073	1.8834	0.46457	0.17446
	91.954	61.282	51.979	20.88	106.88	139.18	25.445		180.49	62.154	297.89	32.112	64.411	25.275	47.573		91.773	91.773	142.56	47.573	31.601	127.35	147.75	62.818	108.36	67.533		0.37171	1.0073	0.34951	0.26143	0.25094	0.36933	0.252		1.7143	0.23965	0.9609	0.29545	0.21268	0.5391	0.20253		0.7942	0.52759	1.0377	2.3689	1.3809	0.27618
	87.414	55.897	51.369	25.665	135.48	156.38	22.771		220.57	59.906	346.92	20.933	52.886	22.761	45.485		108.68	108.68	167.73	45.485	34.188	115.13	134.89	83.88	126.05	58.33		0.34835	1.2725	0.93079	0.83868	1.0178	0.1516	0.20859		0.39225	1.7897	0.36411	0.74683	0.80423	0.38594	0.32928		0.64057	0.52452	1.8664	1.3669	1.978	0.63839
	88.639	59.029	53.838	32.407	164.27	164.57	21.307		254.62	56.782	388.46	11.633	43.937	20.529	43.686		127.46	127.46	199.48	43.686	35.875	105.47	123.65	102.47	140.41	49.294		1.9758	0.32009	0.4132	0.4911	1.2395	0.18962	0.19926		0.64778	0.35729	0.96856	0.76651	0.34681	0.72644	0.23379		0.76307	0.91622	1.0075	1.2067	1.6095	0.24051
	100.72	76.211	58.167	43.024	185.66	161.8	21.961		267.01	52.652	413.86	6.0685	41.734	19.29	42.492		146.86	146.86	236.99	42.492	36.733	104.01	113.87	112.84	145.88	42.835		0.075115	0.3754	0.27817	0.35974	0.66484	0.21135	0.32007		0.9968	1.8472	0.64949	0.21604	0.65732	0.83239	0.37979		1.8129	0.25352	0.47829	0.92306	0.4805	0.22806
	131.2	105.89	63.136	54.261	192.05	151.22	25.64		250.75	45.014	421.17	5.3143	50.313	18.858	42.161		171.4	171.4	293.63	42.161	37.832	114.23	105.22	113.4	137.55	38.215		0.26898	0.20359	0.52122	0.42914	0.2511	0.21526	0.31993		1.1288	1.0124	0.67858	0.31845	0.19416	0.85413	0.53286		0.56665	0.46184	1.8622	0.40389	0.23576	0.27251
	176.68	139.78	67.524	62.865	177.42	135.78	34.639		216.26	33.954	416.16	8.1327	66.892	18.758	42.483		201.9	201.9	369.93	42.483	39.068	132.38	97.814	107.94	119.11	33.828		0.67891	0.41004	0.88015	0.16011	0.67425	0.5923	0.74033		1.7141	0.86456	1.0752	0.15273	0.18275	0.68845	0.89182		0.41661	0.28507	0.74349	0.29602	1.7932	0.3233
	225.85	169.56	72.289	65.581	146.84	118.41	48.351		174.03	23.227	401.76	12.912	85.421	19.269	43.07		231.61	231.61	445.86	43.07	40.336	153.23	92.138	98.915	97.954	30.78		0.39508	0.75829	0.40327	0.66494	1.1876	0.2046	0.12409		3.2499	0.25805	2.95	0.21585	0.21658	0.49192	0.36187		0.22689	0.54232	1.113	0.4289	2.2482	0.5684
	267.41	186.96	78.243	58.56	109.33	102.05	63.337		134.53	16.585	380.86	18.04	99.849	20.67	43.534		253.76	253.76	501.37	43.534	41.534	171.55	88.694	88.734	81.457	30.177		0.74559	1.091	0.57746	0.43297	0.22939	0.086082	0.35927		2.5462	0.21501	0.72441	0.070308	1.0979	0.29977	0.35218		0.091854	0.62425	0.33783	0.57327	0.78692	0.40679
	290.07	188.73	83.953	43.97	73.938	84.565	76.157		108.25	17.782	356.38	21.905	104.13	23.242	43.489		261.59	261.59	516.41	43.489	43.022	182.11	87.982	79.826	77.004	33.124		0.2494	0.94456	0.51037	0.18783	0.21445	0.15339	0.37046		1.6945	0.25392	0.79722	0.047109	0.36392	0.24618	0.15044		0.25289	1.2042	0.61179	0.31176	0.15866	0.75091
	288.93	180.43	87.982	27.587	49.699	64.013	83.372		96.661	28.924	322.71	24.866	93.995	26.973	42.217		249.17	249.17	474.69	42.217	44.872	179.98	87.52	70.985	91.204	40.008		1.0264	0.44095	0.14684	0.19862	0.23519	0.17667	0.34813		0.70456	0.99082	0.34308	0.11298	0.55625	0.16909	0.27503		0.50532	1.1591	0.68212	0.28852	0.33628	0.48208
	271.54	166.87	88.895	15.186	38.758	43.568	82.799		92.777	47.51	277.91	27.998	73.487	31.679	39.978		221	221	389.58	39.978	46.538	168.63	86.975	60.594	119.13	50.094		0.89648	0.16774	0.25825	0.67622	0.36572	0.15155	0.252		0.5099	0.5138	0.87518	0.1009	0.46756	0.161	0.38045		1.3819	0.50138	0.59356	0.26769	0.86194	1.0889
	245.22	152.89	83.925	12.542	35.09	26.409	76.73		94.383	70.378	230.4	30.762	48.991	37.373	37.845		185.99	185.99	285.51	37.845	47.477	155.48	90.07	50.463	150.88	62.798		0.87838	0.57414	0.47456	0.41142	1.3985	0.23742	0.39591		0.69118	0.44947	1.0908	0.46283	0.44284	0.373	0.45475		1.0823	0.4239	1.2055	0.48129	0.56351	0.22632
	217.27	143.32	74.027	22.624	35.477	15.713	68.441		99.264	94.368	188.57	32.62	26.894	44.069	36.894		153.03	153.03	186.91	36.894	47.144	147.93	100.53	42.399	176.54	77.539		1.6509	0.66437	0.59507	1.2622	0.58935	0.10758	0.24934		0.45092	0.60874	0.22453	0.34002	0.65817	0.13408	0.56896		0.29883	0.43038	0.27371	0.25253	0.87933	0.072268
	195.02	138.67	63.354	41.582	36.701	13.915	61.205		105.2	116.32	160.86	33.033	13.584	51.778	38.198		131.02	131.02	118.21	38.198	44.853	153.39	122.07	38.212	186.19	93.736		0.46562	0.092753	0.83666	1.0559	0.34609	0.21421	0.39343		1.428	1.3052	0.84367	0.29024	0.38431	0.10529	0.35405		0.086089	0.5762	1.0401	1.0588	0.23076	0.49278
	175.29	135.74	56.061	64.963	35.543	18.897	58.297		109.21	138.74	148.72	31.216	11.065	63.158	42.143		121.21	121.21	83.057	42.143	40.969	179.57	163.55	39.912	174.84	116.16		0.6131	0.4379	0.91923	0.46705	0.59433	0.94173	0.20034		1.072	0.56008	0.61115	0.51685	0.24345	0.21559	0.26665		0.30732	0.29552	1.3617	0.5343	0.76295	0.27373
	110.99	115.43	47.092	180.38	26.547	183.26	109.27		267.78	52.487	302.12	57.068	116.54	25.96	73.316		181.07	181.07	69.011	73.316	51.506	83.607	157.65	141.81	183.46	40.904		0.38617	0.45024	0.71909	0.93992	0.17737	0.59565	0.15427		1.9391	0.35027	0.90016	0.53441	0.41131	0.38091	0.39964		0.17056	0.41179	1.2304	0.43747	1.7419	0.41263
	99.093	111.95	45.219	187.95	14.634	189.59	92.23		395.2	56.082	302.82	50.84	96.619	25.543	75.369		200.23	200.23	93.432	75.369	57.26	96.205	142.27	149.04	168.58	36.879		0.17924	0.2666	0.6189	1.233	0.37484	0.17647	0.18114		2.0059	0.63154	1.0542	0.31795	0.47224	0.4784	0.54633		1.5326	0.50305	1.4573	0.5042	0.34649	0.1435
	87.154	112.07	45.622	195.56	7.5915	186.12	72.211		504.69	60.325	298.8	46.185	77.933	25.065	76.544		214.9	214.9	117.1	76.544	62.647	106.22	131.82	152.87	153.95	33.601		0.26856	0.22442	0.75878	0.85364	0.42389	0.31779	0.35197		2.0865	0.6581	0.49952	0.12844	0.15704	0.88412	0.97726		0.15927	0.27437	4.1778	0.13731	0.5392	0.10897
	78.961	119.31	47.794	203.57	3.7808	167.19	54.127		567.03	62.251	287.33	44.96	63.495	24.622	76.218		217.17	217.17	133.76	76.218	68.851	109.57	132.57	151.69	143.65	31.15		0.11742	1.0632	0.68904	0.88351	0.11716	0.28271	0.8011		3.0233	0.5429	0.31022	0.42704	0.34917	0.51835	0.41878		1.6582	0.96098	0.096908	0.30591	1.7661	0.54116
	74.419	133.35	51.231	208.63	1.5651	135.41	42.888		571.05	61.572	262.3	49	53.054	24.112	73.767		202.88	202.88	142.76	73.767	76.251	102.3	150.9	143.61	138.77	29.088		0.43124	0.99311	0.23706	0.4697	0.32255	0.4308	0.33638		1.5066	0.54524	0.22283	0.43835	0.46279	0.68318	0.53924		1.3931	0.96788	1.166	0.30475	0.95794	0.15066
	71.005	148.88	55.426	207.41	1.4927	99.252	40.515		536.21	60.266	225.51	57.068	44.601	23.47	69.606		177.29	177.29	148.27	69.606	83.07	87.126	182.67	129.7	136.62	27.359		0.23831	0.31553	0.8164	0.38795	0.16869	0.069346	0.13275		1.0372	0.98514	1.1948	0.1494	0.68404	0.64634	0.16979		0.28959	0.095771	0.2199	0.85586	1.3193	0.18771
	68.861	160.63	62.137	196.54	4.6552	67.204	43.734		479.28	58.764	186.14	66.411	38.514	22.85	64.671		146.65	146.65	151.27	64.671	87.527	69.989	218.26	112.8	135.52	26.624		0.22996	0.30077	0.86327	1.5047	0.559	0.42152	0.61027		1.6289	0.66996	1.6329	0.40357	0.54203	0.82779	0.6962		0.3491	0.3375	0.21241	1.3352	0.9158	0.21905
	68.128	163.3	71.702	170.15	10.23	47.753	49.513		417.06	57.494	153.38	74.275	35.17	22.407	59.9		117.21	117.21	152.73	59.9	87.845	56.812	248.04	95.758	133.79	27.542		0.32548	0.43803	0.77449	2.0884	1.2976	0.17157	0.73101		0.57698	1.1842	1.3413	1.0256	0.66176	0.90178	0.51828		0.88617	0.10717	0.86573	0.39415	0.60111	0.038182
	68.95	153.97	81.483	130.47	17.394	43.045	54.823		366.33	56.887	136.41	77.907	34.945	22.297	56.229		95.2	95.2	153.62	56.229	82.144	53.526	262.4	81.41	129.77	30.773		0.27	1.87	0.93537	0.51536	0.64857	0.68458	0.37795		1.6332	2.3868	0.1602	0.42978	0.13916	0.59849	0.25863		0.49251	0.34786	1.1396	0.46367	0.65384	0.21525
	71.57	136.17	88.843	86.321	25.325	47.421	56.631		321.91	57.214	137.66	76.584	40.346	22.766	53.799		79.904	79.904	151.8	53.799	71.611	64.515	256.72	67.864	121.2	38.339		0.5428	0.1767	0.41457	1.5841	0.14303	0.33039	1.0204		1.7887	0.33669	0.59568	0.75295	0.40666	0.42603	0.067476		1.0348	0.2957	1.8492	1.3759	0.51996	0.51601
	75.893	114.29	91.145	46.528	33.049	57.665	54.13		272.64	58.19	151	72.139	51.121	23.712	51.985		67.156	67.156	146.61	51.985	59.063	85.827	237.41	53.227	109.2	49.8		0.75119	0.85953	0.75873	0.49828	0.41912	0.5433	0.18425		1.9885	0.36173	0.57711	0.71413	0.22788	0.36827	0.5193		0.80539	0.31865	0.85266	0.87375	0.12374	0.025818
	81.554	92.689	85.938	19.912	41.115	70.561	49.341		226.24	59.405	172.79	65.661	63.511	24.764	50.577		58.046	58.046	141.29	50.577	47.318	110.88	211.41	40.338	97.143	62.123		0.46498	0.2677	1.4353	0.10699	0.38089	0.25673	0.68281		1.1618	0.22002	1.0287	0.22323	0.57082	0.65872	0.11998		2.5428	0.63092	0.85153	0.28048	0.1569	0.25583
	88.185	75.764	74.982	8.5903	50.983	82.891	43.475		190.44	60.452	199.4	58.236	73.757	25.55	49.363		53.663	53.663	139.07	49.363	39.192	133.11	185.63	32.035	88.393	72.274		0.30124	0.5709	0.52125	0.66324	0.32176	0.23518	0.14571		0.40375	0.44559	1.3076	0.093824	0.42007	0.47672	0.3876		0.40696	0.2661	1.19	0.23443	2.0153	0.38619
	95.418	61.848	61.95	6.6815	64.114	97.362	37.743		172.99	60.923	227.16	50.954	78.1	25.702	48.133		55.098	55.098	143.17	48.133	35.309	145.91	167.02	31.156	86.318	77.221		0.36757	1.0079	0.57733	0.61014	1.1126	0.43761	0.74584		0.63208	0.47014	1.1101	0.25304	0.2911	0.30527	0.20818		0.71912	0.28119	0.75527	0.062458	1.034	0.17676
	103.34	48.021	50.516	11.009	81.969	116.12	33.356		184.33	61.175	261.54	42.69	73.424	24.961	46.883		63.642	63.642	152.55	46.883	33.793	145.44	156.68	41.892	94.6	75.339		0.91343	1.6721	0.83376	0.30308	0.26474	0.17465	0.34179		0.16139	0.32231	0.53806	0.28873	1.1815	0.34126	0.59097		0.46795	0.52395	1.7854	0.42898	2.0686	0.93324
	112.2	36.777	44.352	18.396	111.42	135.1	29.287		219.31	61.479	304.97	32.718	62.234	23.574	45.752		78.569	78.569	165.03	45.752	33.705	136.07	150.01	62.352	110.99	68.651		0.48415	1.2753	0.82682	0.44324	0.55041	0.12421	0.47589		0.81059	0.63774	0.91688	0.12913	1.0207	0.13658	0.33289		0.43652	0.63028	0.89716	1.0683	0.39489	0.94345
	121.86	30.61	44.796	25.666	151.5	150.25	24.727		262.25	61.3	349.26	22.725	49.206	21.928	44.747		97.941	97.941	182.22	44.747	34.11	123.61	145.31	86.248	129.97	59.592		0.67558	1.3363	0.9067	0.53531	0.2771	0.12871	0.66435		0.97869	0.25281	1.7653	0.14872	0.64322	0.23827	0.09432		0.64664	0.25093	1.7096	0.31247	1.4491	1.6788
	132.2	32.015	49.398	35.451	191.9	157.51	21.219		297.45	60.103	386.24	14.397	39.013	20.409	43.875		119.82	119.82	205.72	43.875	34.072	113.85	140.93	107.29	146.03	50.6		0.41689	1.528	0.46286	1.614	1.0424	0.13082	0.24307		1.9591	0.97943	0.66159	0.29802	0.614	0.18929	0.92106		0.43233	0.62549	0.34921	0.23125	0.51809	0.39476
	143.08	45.041	56.154	49.87	222.29	155.31	20.305		309.24	57.353	407.72	9.4194	36.332	19.404	43.143		142.27	142.27	237.13	43.143	33.574	112.6	135.17	119.2	153.63	44.111		0.80252	0.62848	0.19765	0.79201	0.71651	0.034713	0.17596		0.98601	0.27389	1.3235	0.52565	0.18985	0.17072	0.13492		0.79779	0.38289	0.75495	0.76065	2.0719	0.56676
	155.24	68.026	63.06	64.973	232.36	146.36	23.527		289.85	50.628	411.2	8.7545	45.24	18.576	42.662		169.78	169.78	289.08	42.662	33.241	123.71	126.53	120.24	148.81	39.432		0.31026	0.90027	1.2171	0.37428	0.50875	0.071129	0.16902		0.53413	0.42271	0.73479	0.076923	0.046799	0.3403	0.36189		0.15623	0.37934	0.38161	1.1382	0.82066	0.5605
	168.79	94.894	68.115	76.812	214.19	133.01	33.725		249.73	40.285	402.13	11.278	62.622	17.667	42.429		203.65	203.65	360.51	42.429	33.096	143.33	116.12	114.58	135.23	34.938		0.21477	0.47199	0.30405	0.36856	0.22169	0.21219	0.31776		0.39137	0.24129	0.48096	0.49946	0.12345	0.073087	0.089695		0.057195	0.16478	1.8626	0.95994	0.87475	0.12023
	182.59	119.57	71.55	81.438	174.65	117.59	49.872		200.54	29.956	384.28	15.547	82.358	17.183	42.274		237.14	237.14	432.46	42.274	33.165	165.66	106.22	104.85	118.87	31.669		0.061934	1.0392	0.24591	0.37025	0.24729	0.26728	0.82416		0.60172	0.35988	0.87491	0.3492	0.18032	0.20875	0.38405		0.92193	0.17169	1.7866	0.76375	1.0611	0.36465
	195.53	135.99	74.701	74.69	125.64	102.46	67.706		153.92	23.273	361.37	20.12	98.332	17.629	42.028		263.48	263.48	485.97	42.028	33.472	184.88	99.098	93.658	105.71	30.665		0.1622	1.474	0.54577	1.0993	0.29415	0.25262	0.1344		1.611	0.16882	0.42359	0.25467	0.2418	0.34065	0.49862		2.1668	1.146	2.4873	0.36781	2.2155	0.34246
	206.47	142.26	77.219	59.202	79.027	85.393	82.966		121.54	23.868	337.16	23.552	104.42	19.512	41.523		275.94	275.94	502.07	41.523	34.202	195.22	97.036	83.62	101.72	32.965		0.78093	0.3129	0.35175	0.19979	1.1552	0.45435	0.73036		1.3274	0.54962	0.36621	0.14666	0.18351	0.46695	0.083768		0.71691	0.29184	1.9851	0.50735	1.2088	0.23546
	217.54	142.44	78.753	41.213	46.695	64.822	91.391		104.59	33.564	307.21	26.214	96.748	22.928	39.848		269.7	269.7	466.73	39.848	35.339	191.68	97.302	73.168	111.86	38.805		0.23826	0.086917	0.96373	0.99196	0.296	0.15225	0.084712		1.1738	0.54924	0.39107	0.3057	0.49674	0.64462	0.17138		0.839	0.9316	1.8182	0.48271	2.3513	0.34111
	229.5	139.34	78.952	26.964	30.744	44.081	90.412		95.304	49.942	269.03	29.068	79.382	27.539	37.117		249.26	249.26	392.6	37.117	36.605	178.15	98.378	60.56	132.17	47.492		1.491	0.52602	0.20699	0.64611	0.40372	0.38734	0.54268		1.0728	0.83345	0.45742	0.19816	0.089152	0.53612	0.64955		0.75206	0.29937	0.61878	1.1674	0.21258	0.421
	239.15	135.79	76.053	22.695	23.254	26.504	82.869		91.88	70.264	229.27	31.56	58.157	33.201	34.694		221.83	221.83	300.72	34.694	37.723	162.07	104.36	48.146	155.18	58.672		1.0542	0.46512	0.8224	0.49949	0.51704	0.32761	0.18718		0.46762	1.0086	0.83185	0.20394	0.68035	0.53333	0.15507		0.66402	0.61213	0.1775	0.3676	0.84453	0.2579
	243.3	134.62	70.288	31.456	21.075	15.422	72.617		92.516	91.792	194.57	33.133	38.904	39.77	33.941		194.65	194.65	212.13	33.941	38.415	150.91	119.35	38.276	173.42	71.99		0.80273	0.12958	0.99887	0.88924	0.17067	0.054148	0.48105		0.86198	0.44876	0.44308	0.4046	0.19592	0.74783	0.21192		0.13203	0.21034	0.42897	0.23268	1.4813	0.18361
	238.78	137.06	64.304	49.085	21.057	13.121	63.511		95.408	111.79	171.58	33.233	27.454	47.102	36.222		174.92	174.92	147.87	36.222	38.643	152.1	147.44	33.303	179.43	87.092		1.0625	0.086294	0.65793	0.23086	1.4451	0.14341	0.321		0.15195	0.75757	0.66618	0.58088	0.33963	0.63551	0.608		0.06579	0.77434	0.35397	2.2945	1.4608	0.11014
	219.59	141.24	60.748	71.011	20.05	17.378	59.404		98.133	132.71	161.99	30.914	25.6	57.531	42.864		162.36	162.36	108.98	42.864	38.592	172.43	200.36	35.627	169.5	108.49		0.41567	0.34083	0.34458	0.081955	0.8074	0.27901	0.15153		1.4821	1.2997	0.94428	0.2782	0.51143	0.44721	0.16769		0.16854	0.51338	1.4504	0.46405	1.8708	0.19
	187.85	145.28	62.265	92.659	17.802	24.768	62.699		101.89	156.39	161.37	26.546	29.456	71.154	52.956		152.15	152.15	81.428	52.956	38.319	206.92	275.39	43.682	148.59	136.42		0.48429	0.89855	1.2467	0.7088	0.27428	0.42059	0.57898		0.40347	1.2299	1.5814	0.38349	0.38229	0.54661	0.30454		0.27461	1.0657	0.42639	1.9685	0.91099	0.081347
	152.56	147.35	71.373	109.46	16.414	31.862	70.828		110.32	179.13	167.18	21.548	36.33	84.468	64.511		144.73	144.73	63.663	64.511	37.881	245.41	354.92	53.865	122.28	164.11		0.79196	0.64898	1.3015	0.19293	0.40162	0.48773	0.35272		1.1347	0.06924	1.6978	0.29795	0.086275	0.5486	0.16799		0.43003	1.0435	0.47519	1.1476	0.14289	0.24343
	122.68	145.57	86.308	121.86	16.263	35.236	80.185		127.06	197.25	176.88	17.34	43.531	93.974	75.538		140.54	140.54	54.125	75.538	37.337	277.78	421.36	62.57	96.178	184.8		0.8285	1.4579	0.27749	0.33772	0.21135	0.11763	0.89268		0.30767	0.42177	2.2232	0.34797	0.2192	0.36983	0.46302		0.7193	0.3606	1.1424	0.19408	0.19786	0.22304
	107.19	137.48	103.29	132.91	17.725	33.91	87.167		155.74	207.06	187.92	15.34	48.369	96.172	84.049		140.03	140.03	51.256	84.049	36.507	293.85	457.09	66.193	75.852	191.72		0.32795	1.3733	0.40452	0.53729	0.36927	0.14773	0.28067		1.1867	1.4277	0.58105	0.069585	0.21639	0.074984	0.24372		2.2615	0.71812	0.13411	0.10548	1.3223	0.31098
	111.82	124.3	118.55	141.93	21.177	30.169	88.17		207.5	207.4	202.57	16.018	51.233	87.811	90.436		146.53	146.53	59.574	90.436	35.351	285.25	454.22	61.841	59.864	179.6		1.0419	1.5807	0.57381	0.13133	1.1627	0.029033	0.23088		2.0262	0.45455	0.70691	0.26758	0.12363	0.14405	0.53038		0.62128	0.62046	0.42782	0.36262	0.40577	0.89717
	89.159	171.91	77.634	111.36	154.8	118.57	103.09		91.405	86.679	318.91	61.504	146.75	23.43	55.679		165.18	165.18	74.291	55.679	26.929	106.64	175.36	104.64	161.64	65.369		0.5043	0.069526	0.20676	0.83965	0.58361	0.10186	0.10267		1.113	0.56732	0.6014	0.13607	0.66041	0.51222	0.62242		1.2169	0.24836	0.60127	0.37926	0.64746	0.83647
	116.64	151.52	68.421	120.62	116.63	129.21	114.7		92.88	65.72	329.06	58.861	140.63	25.358	59.52		158.91	158.91	54.149	59.52	28.859	110.19	173.33	113.66	182.41	59.282		1.4315	0.54735	0.06798	0.3615	0.40143	0.14411	0.38438		0.87323	0.68985	0.85906	0.35566	0.41183	0.35076	0.14084		0.97944	0.64863	0.49969	0.5929	0.73816	0.94491
	132.28	142.8	61.027	129.86	81.35	141.26	122.55		114.19	52.139	335.08	55.978	132.98	26.501	62.821		160.33	160.33	45.715	62.821	34.74	110.53	170.96	120.72	192.88	53.865		0.79918	0.22413	0.53295	0.23596	1.1829	0.12973	0.37475		0.38575	0.52688	0.73432	0.24413	0.68531	0.16286	0.33103		0.56397	0.15902	2.0981	0.44505	0.25446	0.67192
	133.12	140.44	55.223	139.02	53.956	155.03	124		168.78	47.974	337.41	52.043	122.62	26.602	65.974		176.25	176.25	53.667	65.974	44.333	107.69	166.2	126.64	189.76	48.64		0.37864	0.84905	0.33168	1.3771	0.45583	0.046646	0.42957		0.73962	1.1459	0.16201	0.10903	1.5065	0.19588	0.1912		0.33102	0.98395	0.70046	0.20019	0.20196	0.84758
	124.64	141.28	50.78	148.03	35.206	167.15	115.91		250.96	50.177	336.88	46.998	109.28	25.993	69.343		205.49	205.49	73.61	69.343	55.286	104.67	158.02	132.22	177.47	42.713		1.5117	1.0047	0.45167	0.32173	0.39136	0.10242	0.72453		0.86086	1.1447	0.93518	0.081863	0.25211	0.15372	0.22109		0.14729	0.38235	2.2967	0.4086	1.8322	0.61389
	111.3	142.13	47.614	156.84	21.776	174.24	100.07		340.57	55.691	332.82	42.057	94.723	25.062	72.343		237.85	237.85	98.529	72.343	65.248	101.44	149.49	136.22	160.97	36.797		0.28818	0.46462	0.15005	0.45481	0.15407	0.15368	0.84869		0.59597	1.6696	0.85299	0.11946	0.34882	0.081411	0.070067		0.3658	0.17387	0.72571	0.21942	1.2079	1.0487
	97.553	139.82	45.876	168.8	12.523	172.91	81.147		417.44	61.455	324.53	38.435	80.711	24.193	74.39		263.17	263.17	121.41	74.39	71.87	97.965	143.7	137.42	145.17	31.609		0.30429	0.85528	0.57279	0.38286	0.76962	0.20617	0.42899		0.34582	1.4341	0.092239	0.32145	1.1137	0.54452	0.85031		1.2394	0.28947	1.8645	0.52785	1.763	0.52267
	87.846	134.1	45.695	183.95	6.3051	158.37	63.827		461.43	64.413	311.33	37.349	69.011	23.773	74.896		271.25	271.25	135.24	74.896	74.751	94.194	143.74	134.59	135.03	27.864		0.10228	0.24942	0.12487	0.59706	1.0203	0.49986	0.65076		0.54185	1.1462	1.1664	0.17623	0.23881	0.60022	0.14458		1.1338	0.19595	0.52644	0.22513	0.98497	0.074001
	81.928	127.07	47.2	197.26	1.9799	132.88	52.788		464.37	64.223	288.17	40.096	58.802	23.969	73.364		256.91	256.91	136.87	73.364	75.459	88.365	153.22	126.06	132.27	25.168		0.14562	0.33233	0.16941	0.36343	0.77592	0.038265	0.12664		0.61346	0.61383	0.18674	0.69072	0.28274	0.50996	0.18517		0.36124	0.57142	2.1732	0.91561	0.963	0.2766
	76.831	119.14	50.519	203.71	-0.21207	103.62	49.777		439.72	62.924	255.52	45.866	48.908	24.525	70.184		226.92	226.92	130.99	70.184	74.592	80.502	170.08	112.65	133.6	23.045		0.36176	1.1482	1.5385	0.53938	0.32773	0.53735	0.53328		0.18595	0.88204	0.96574	0.25424	1.0646	0.28402	0.21491		0.13595	0.4354	1.4434	1.032	0.41061	0.22477
	72.936	110.68	57.825	198.27	0.49061	77.789	51.675		399.69	61.028	220.94	52.712	40.559	25.188	66.104		189.09	189.09	122.3	66.104	72.751	73.259	188.91	96.865	136.43	22.084		0.34806	0.41715	0.48058	0.38406	0.11254	0.48185	0.11782		0.60356	0.79356	0.8314	0.16886	0.45829	0.52642	0.72702		0.75488	0.53007	0.16144	0.51446	2.3229	0.28081
	70.619	102.09	69.032	174.73	3.7273	62.577	55.859		356.5	59.046	191.99	58.684	34.984	25.706	61.872		151.21	151.21	115.52	61.872	70.534	69.285	204.27	81.194	138.15	22.876		2.1305	0.23815	0.96191	0.64715	0.26838	0.27848	0.22719		1.3188	0.80889	0.4436	0.21495	0.44062	0.60526	0.17325		0.53609	0.67215	0.63342	0.46729	1.3345	0.48978
	70.26	93.063	80.881	136.43	9.1376	60.217	59.71		322.37	57.49	176.25	61.834	33.413	25.828	58.236		121.08	121.08	115.36	58.236	67.583	71.231	210.74	68.138	136.14	26.009		1.8336	0.39771	0.56106	0.59643	0.086022	0.19977	1.3385		0.36646	0.97364	0.56525	0.64671	0.35216	0.67256	0.14383		0.051493	0.24322	0.58571	0.17104	0.47432	0.26078
	71.563	83.349	90.113	92.709	16.361	65.915	60.605		293.39	56.117	175.94	61.871	38.528	25.434	55.02		96.396	96.396	123.64	55.02	63.499	82.517	204.94	55.84	127.61	33.465		1.9968	0.5094	0.3721	0.71035	1.8549	0.3273	1.1883		0.36588	0.35	0.99034	0.69596	0.10722	0.43501	0.51328		0.24161	0.26836	0.43526	0.98078	0.42906	0.22511
	74.275	73.391	93.47	52.865	24.525	76.321	57.9		261.4	54.587	186.01	60.094	49.508	24.69	51.725		71.965	71.965	137.23	51.725	58.818	101.38	190.48	42.634	114.28	44.849		0.77198	1.4927	0.15378	1.1167	0.23793	0.096345	0.23658		0.98331	0.70653	0.56267	0.61898	0.11138	0.22748	0.28039		0.10742	0.54215	0.55922	1.5781	0.21367	0.28472
	78.84	63.636	88.232	26.215	33.869	88.084	53.343		232.28	53.263	203.13	56.94	62.331	23.778	48.616		51.233	51.233	153.38	48.616	54.081	122.68	172.44	31.307	100.38	57.192		0.80273	0.44779	0.51032	0.55177	0.17494	0.044778	0.69868		0.98924	0.38936	0.39029	0.274	0.27095	0.16903	0.22225		0.85967	0.58486	0.10596	0.34651	0.95813	0.57727
	85.704	54.53	76.571	14.383	45.704	97.854	47.9		211.93	52.509	223.97	52.846	72.978	22.879	45.955		37.65	37.65	169.35	45.955	49.825	141.29	155.9	24.646	90.112	67.524		0.27734	0.29717	0.53548	0.65626	1.4291	0.08326	0.41059		1.2716	0.13602	0.12984	0.091643	0.3495	0.15167	0.50848		0.76056	0.41338	0.54775	0.30903	0.21012	0.12159
	95.311	44.404	62.567	11.161	61.336	107.07	42.538		206.22	52.69	245.23	48.249	77.425	22.176	44.005		34.663	34.663	182.42	44.005	45.944	152.09	145.92	25.437	87.699	72.875		1.2363	0.44635	0.30216	0.77507	0.3382	0.1566	0.78427		2.0022	0.20905	1.1674	0.13521	0.916	0.34787	0.0547		0.41703	0.92486	0.95463	0.96066	0.30794	0.63644
	110.87	32.96	50.3	14.112	82.074	117.98	38.224		225.1	54.799	271.4	42.127	72.535	21.766	43.035		45.227	45.227	189.11	43.035	42.077	151.58	144.93	38.1	96.893	71.802		0.44879	0.41926	0.97983	0.50995	0.54328	0.2237	0.13453		1.1124	1.1823	2.0641	0.10736	0.25946	0.28471	0.45908		0.61782	0.052385	0.44469	1.1062	0.51625	0.67875
	132.09	22.703	43.852	20.8	115.73	128.4	33.809		264.62	58.59	304.72	34.189	60.989	21.53	42.867		67.04	67.04	191.26	42.867	38.387	143.17	149.56	60.777	114.88	66.285		1.0889	1.3782	0.089611	0.39028	0.30046	0.19341	0.038184		1.3723	1.111	1.1608	0.10115	0.42097	0.12795	0.22336		1.1739	0.3953	0.073644	1.4466	0.21543	0.46687
	154.15	16.134	44.875	28.79	161.42	136.18	28.649		309.91	62.578	338.4	25.968	47.494	21.318	43.102		95.675	95.675	194.05	43.102	35.034	132.11	156.15	86.839	136.04	58.488		0.70142	0.89598	0.77515	0.73759	0.80952	0.11153	0.44689		1.7861	0.98708	0.35016	0.11328	0.32075	0.20662	0.35332		0.28093	0.24666	0.20325	1.6136	0.39433	0.38259
	172.24	15.758	50.647	41.512	207.44	139.14	24.466		346.05	65.275	365.66	18.996	36.759	20.98	43.339		126.7	126.7	202.68	43.339	32.18	123.66	161.09	109.66	154.73	50.579		1.1513	0.9152	0.44256	0.62288	0.62153	0.16779	0.24486		1.3576	1.337	0.34564	0.17661	0.34656	0.2107	0.36319		0.39656	0.33417	0.72863	0.60493	0.822	0.25882
	181.53	23.982	58.691	60.59	242.08	136.44	22.982		358.16	65.191	379.72	14.804	33.493	20.369	43.18		155.7	155.7	222.35	43.18	29.816	123.07	160.73	122.61	165.33	44.722		0.70647	0.61389	0.3918	0.264	1.251	0.30117	0.075067		0.39032	0.77106	0.58835	0.25298	0.31195	0.1581	0.34666		0.48024	0.5677	1.1354	0.41973	0.92364	0.77686
	176.62	39.137	66.529	80.879	253.64	129.53	25.921		338.27	60.041	377.61	14.139	41.185	18.811	42.596		186.31	186.31	263.74	42.596	27.837	134.09	151.51	123.75	165.17	40.249		0.58178	0.4356	0.24535	0.71859	0.55025	0.26401	0.27241		0.47482	0.45712	0.75569	0.22521	0.74747	0.36175	0.32746		0.48342	0.2011	0.93239	0.38419	1.3864	0.63643
	160.71	57.612	71.683	97.233	233.05	119.67	36.244		296.29	50.817	363.87	15.978	56.696	16.408	41.854		221.48	221.48	323.39	41.854	26.252	153.23	135.85	117.52	157.99	35.715		0.69954	0.92068	0.27952	0.81859	0.97478	0.20645	0.19506		0.56188	0.21887	0.34332	0.64112	1.0002	0.46249	0.27642		1.0529	0.11821	0.72476	0.36567	1.2144	0.88655
	141.93	75.796	73.872	104.51	188.14	108.14	52.802		244.2	40.948	342.92	19.204	74.792	14.165	40.995		255.74	255.74	385.27	40.995	25.073	174.84	119.1	106.8	147.81	32.125		0.37503	0.84174	0.39677	0.62986	0.45401	0.43928	0.51472		0.80514	0.09147	0.47445	0.28944	0.3158	0.63444	0.37969		1.0163	0.87892	0.34597	1.5556	2.3171	0.72291
	128.4	90.078	74.75	98.313	132.47	96.204	71.153		193.95	33.864	319.22	22.701	90.238	13.09	40.061		283.64	283.64	433.34	40.061	24.311	193.29	106.62	94.481	138.65	30.483		0.63578	0.33722	1.0323	0.27738	0.44173	0.098695	0.26738		1.0025	0.55635	1.5357	0.051951	0.33572	0.59871	0.7835		0.44875	0.6528	0.51197	1.3758	0.91112	0.32465
	128.24	99.92	74.736	82.079	79.604	82.018	86.854		157.52	32.995	297.2	25.35	97.8	14.189	39.093		299.69	299.69	451.56	39.093	23.821	202.93	103.77	83.46	134.51	31.792		0.50245	0.12391	1.2758	0.26742	0.55971	0.19256	0.46347		0.75329	0.27541	1.2459	0.21046	0.76036	0.3683	0.7265		1.3444	1.0009	0.27755	0.90782	1.7965	0.16226
	149.83	107.73	74.246	62.391	43.108	64.732	95.462		135.23	39.628	274.11	27.554	94.726	18.054	36.868		300.94	300.94	430.64	36.868	23.593	199.61	108.23	71.969	137.87	36.231		0.69958	0.54711	0.31867	0.10551	0.1361	0.25376	0.59195		0.90459	0.59727	0.74699	0.05613	0.29286	0.50848	0.57899		1.0853	0.099096	0.56485	0.27069	1.8316	0.65822
	187.77	114.31	73.7	45.832	25.136	47.121	94.331		119.13	51.475	246.99	30.057	84.507	24.012	33.358		291.02	291.02	381.27	33.358	23.849	187.1	116.45	58.079	146.05	43.13		0.68489	0.99643	0.36801	0.25371	0.17242	0.54356	0.31902		1.2666	1.1247	0.14341	0.091723	0.061726	0.54967	0.24262		1.0619	0.063598	1.3308	0.14275	1.2388	0.68328
	229.47	120.48	72.055	38.986	16.642	31.957	86.422		108.69	66.607	219.98	32.258	71.269	31.179	30.398		274.4	274.4	317.39	30.398	24.807	171.61	131.88	44.441	155.35	52.223		0.95807	0.99375	0.082071	0.4241	0.33983	0.52292	0.4657		0.71612	0.48841	0.71045	0.54588	0.16766	0.5698	0.56636		0.065985	0.67858	0.50389	0.58675	1.405	0.99904
	262.36	127.03	69.034	44.659	14.4	22.011	75.705		103.38	83.095	197.2	33.554	59.137	38.669	29.824		255.53	255.53	252.95	29.824	26.686	159.35	157.98	33.705	162.05	63.242		1.5497	1.4164	0.18603	0.41456	1.4253	0.27683	0.5879		0.18075	0.88086	0.34793	0.17435	0.35258	0.72815	0.18252		0.75228	0.11686	0.52177	0.1461	1.0417	0.83611
	273.86	135.82	66.197	58.461	15.179	18.899	66.15		102.71	99.008	182.81	33.344	52.238	45.597	33.472		238.86	238.86	201.9	33.472	30.426	156.54	198.2	28.52	162.43	75.92		2.2658	1.37	0.58655	0.82316	0.12985	0.056189	0.44117		0.4206	1.1441	1.4982	0.072208	0.36167	0.88943	1.0165		0.73213	0.16625	0.31218	0.64921	0.72765	0.15044
	255.58	146.32	65.109	76.185	15.75	20.77	61.726		106.01	116.66	178.89	30.467	51.775	53.329	43.8		221.95	221.95	161.39	43.8	35.879	168.18	268.14	31.56	154.49	93.765		0.4864	1.5858	0.24548	1.9198	1.3334	0.0092978	0.77936		0.72405	0.70684	1.4547	0.29214	0.38	0.42852	0.3972		0.51024	0.85324	1.4584	0.26525	0.92815	0.31073
	215.9	155.74	67.331	93.622	16.648	25.205	64.983		113.65	137.35	182.68	25.325	54.996	62.454	59.585		201.81	201.81	122.13	59.585	41.639	190.14	365.48	41.059	140.7	116.95		1.2177	2.5824	0.62781	0.83387	1.037	0.015381	0.34044		1.1453	0.15209	1.7217	0.48074	0.46186	0.14105	0.15613		0.28644	0.26544	0.505	0.064268	1.4618	0.10144
	167.42	161.3	74.427	106.57	20.027	29.786	73.275		126.57	157.58	191.05	19.658	60.099	70.926	77.139		182.14	182.14	88.375	77.139	46.296	214.89	466.86	53.005	124.07	140.23		0.94545	3.3195	1.0369	0.34364	1.4218	0.12822	0.65036		1.7955	0.16024	0.30055	0.14429	0.21831	0.20785	0.10495		0.094157	0.84201	0.66716	0.69844	1.0377	0.56905
	122.7	160.23	85.356	114.72	25.084	32.09	82.777		145.75	173.9	200.84	15.209	65.279	76.695	92.769		166.63	166.63	64.405	92.769	48.443	234.94	548.88	63.39	107.62	158.32		0.28081	3.5945	0.27218	0.49247	1.7177	0.10863	0.38221		1.5152	0.28636	1.5453	0.066987	0.17409	0.15758	0.1203		0.15849	0.13256	1.0917	0.42705	0.37305	0.31242
	94.338	148.03	97.772	120.88	31.015	31.722	89.666		172.16	182.82	208.93	13.719	68.734	77.715	102.79		158.95	158.95	54.483	102.79	46.848	242.76	588.18	68.204	94.339	165.97		0.046132	1.9055	1.3492	0.49684	0.81482	0.25614	0.11167		0.47336	1.2814	1.0938	0.1932	0.14758	0.24772	0.2319		0.40091	0.75459	0.79643	0.36918	0.19524	1.2981
	85.896	126.55	109.33	125.51	37.016	30.294	90.119		214.94	183.22	213.29	16.124	70.985	71.868	106.23		162.79	162.79	65.249	106.23	42.449	231.03	571.75	64.434	83.457	159.77		0.23951	1.4302	0.35406	0.53363	0.31024	0.1401	0.069876		0.082455	0.56446	0.48626	0.11935	0.28594	0.27605	0.25951		1.8565	0.51621	0.41917	0.48602	0.56542	0.21005
	51.298	90.309	61.227	33.118	131.65	164.59	25.094		213.04	56.335	362.64	10.902	53.919	21.838	42.021		162.98	162.98	177.31	42.021	37.477	98.936	106.92	92.958	137.86	45.345		0.60325	1.0195	0.73494	0.75263	0.96873	0.2555	0.39372		0.36523	0.54402	0.5347	0.11829	0.31549	0.17056	0.28129		0.31486	0.29507	2.2228	0.25852	0.47253	0.55062
	66.678	179.93	60.987	206.39	12.53	93.804	32.064		585.27	61.527	202.07	61.692	43.266	22.984	68.117		143.87	143.87	165.1	68.117	92.056	91.263	188.17	139.59	142.49	31.748		0.3165	0.95946	0.32176	1.0209	1.2152	0.63559	0.026196		0.19978	0.75506	1.1845	0.23686	0.17194	0.24349	0.73536		1.1595	2.3266	0.44833	0.13632	0.58592	0.23583
	66.439	213.59	66.917	193.6	19.868	65.744	36.947		522.24	60.232	161.82	71.963	40.156	21.694	63.895		118.9	118.9	176.27	63.895	101.79	69.968	233.03	121.88	137.47	31.06		0.3662	0.40248	0.21563	0.056872	0.33628	0.066621	0.46316		0.75696	0.77741	0.14526	0.12638	0.57142	0.30249	0.12882		0.69326	0.65168	0.111	1.0474	0.47674	0.12137
	67.398	228.92	75.471	168.01	29.234	48.735	44.443		452.14	59.245	128.46	80.555	39.519	20.775	59.885		95.823	95.823	183.35	59.885	104.38	52.616	270.81	103.95	132.17	31.827		0.83061	0.38381	0.58592	0.41586	0.14512	0.15363	0.58753		2.1431	0.41692	0.46328	0.30718	0.47485	0.407	0.35099		1.3683	0.53929	0.31621	1.1225	0.6774	0.5807
	69.53	220.33	84.27	131.02	39.08	44.438	51.205		393.23	58.898	111.69	84.387	40.719	20.593	56.86		79.631	79.631	184.61	56.86	96.8	46.58	289.66	88.9	125.94	34.734		0.32124	0.64608	1.0064	0.54951	0.52025	0.23197	0.35985		0.81836	0.23803	1.3368	0.51885	0.21388	0.33901	0.92342		0.25284	0.89599	1.1367	1.052	0.44986	0.21423
	73.722	195.3	90.933	90.308	47.857	48	53.889		339.18	59.639	113.94	82.615	45.854	21.613	55.059		70.321	70.321	175.13	55.059	81.489	56.395	284.44	75.001	116.96	41.673		0.3265	0.62676	1.5732	1.2362	0.18223	0.17478	0.40837		0.87912	0.31576	0.93458	0.16609	0.3842	0.31933	0.79685		0.81245	0.57363	1.3839	0.097324	1.1921	0.18133
	79.991	162.21	93.083	53.538	54.467	56.935	51.39		277.83	61.246	128.73	77.292	55.348	23.59	53.97		64.563	64.563	156.06	53.97	62.98	77.145	263.04	60.164	105.65	52.185		0.21909	0.18644	1.9734	1.1573	0.44735	0.38613	0.35749		0.53347	0.20497	0.8287	0.35045	0.78692	0.32735	0.41039		0.90006	0.15191	1.2306	0.19285	2.276	0.20846
	87.005	129.42	88.64	28.382	59.941	68.754	45.94		218.67	63.048	152.43	69.685	66.053	25.827	53.229		62.365	62.365	134.78	53.229	45.809	102.03	233.18	47.008	94.764	63.437		0.3878	0.78494	0.51321	0.41449	0.058566	0.12584	0.28632		0.2467	0.18027	1.0537	0.24058	0.35185	0.41487	0.45078		0.90316	0.46077	0.88808	0.35994	0.63395	0.26743
	93.437	105.3	79.192	16.756	65.929	80.969	39.193		171.17	64.372	181.4	61.06	74.824	27.628	52.475		63.731	63.731	118.68	52.475	34.511	124.25	202.58	38.152	87.024	72.591		2.1902	0.64145	0.52993	0.8276	0.43027	0.080771	0.23938		0.21845	0.34209	0.33756	0.12175	0.32992	0.42323	0.27716		0.41201	0.18039	0.057118	0.43286	0.37793	0.98693
	97.956	88.308	67.855	13.549	74.079	96.74	32.802		144.81	64.546	212.01	52.682	78.514	28.296	51.347		68.668	68.668	115.17	51.347	30.156	136.99	178.95	36.214	85.165	76.813		0.53823	0.42074	0.47577	2.4537	0.29048	0.046484	0.14596		0.24918	0.35171	0.27651	0.21464	0.91334	0.18192	0.60838		0.70048	0.20103	0.74637	0.13592	0.55303	0.42277
	97.166	72.861	57.745	15.882	86.043	117.72	28.421		150.03	63.658	250.03	43.314	74.344	27.357	49.632		78.016	78.016	124.77	49.632	29.722	136.51	162.39	45.018	92.886	74.497		0.21958	0.057518	0.49566	0.74388	0.31388	0.087842	0.64047		0.29644	0.73987	0.57992	0.23547	0.26509	0.17176	0.42497		0.35494	0.13697	0.43119	0.28007	0.95933	0.16476
	91.954	61.282	51.979	20.88	106.88	139.18	25.445		180.49	62.154	297.89	32.112	64.411	25.275	47.573		91.773	91.773	142.56	47.573	31.601	127.35	147.75	62.818	108.36	67.533		0.25716	0.39607	1.4164	1.2782	0.1609	0.10327	0.87355		1.1395	0.40086	0.62248	0.39892	0.33954	0.20574	0.32172		0.0567	0.50667	0.24647	0.30664	0.38011	0.26067
	87.414	55.897	51.369	25.665	135.48	156.38	22.771		220.57	59.906	346.92	20.933	52.886	22.761	45.485		108.68	108.68	167.73	45.485	34.188	115.13	134.89	83.88	126.05	58.33		0.9249	0.31273	1.7326	0.30488	0.49543	0.17459	0.11893		1.2229	0.68747	0.38077	0.095737	0.20183	0.15706	0.12101		0.21256	0.26231	0.22742	0.032225	1.0397	0.64061
	88.639	59.029	53.838	32.407	164.27	164.57	21.307		254.62	56.782	388.46	11.633	43.937	20.529	43.686		127.46	127.46	199.48	43.686	35.875	105.47	123.65	102.47	140.41	49.294		0.19331	0.44263	0.13368	1.037	0.82696	0.18634	0.47354		1.8324	1.0179	1.7629	0.013842	0.59173	0.080361	0.2175		0.46177	0.32589	0.25788	0.30901	1.3304	0.23133
	100.72	76.211	58.167	43.024	185.66	161.8	21.961		267.01	52.652	413.86	6.0685	41.734	19.29	42.492		146.86	146.86	236.99	42.492	36.733	104.01	113.87	112.84	145.88	42.835		0.12502	0.46389	0.077643	0.58145	0.35065	0.2368	0.15621		1.6497	0.46946	1.4249	0.13029	0.17711	0.41775	0.28749		0.62115	0.22501	0.50912	0.12419	1.3418	0.6811
	131.2	105.89	63.136	54.261	192.05	151.22	25.64		250.75	45.014	421.17	5.3143	50.313	18.858	42.161		171.4	171.4	293.63	42.161	37.832	114.23	105.22	113.4	137.55	38.215		0.20247	0.35339	0.62158	0.69269	0.14451	0.25283	0.018631		1.8233	0.55789	1.3677	0.13376	0.16985	0.25245	0.11192		0.2496	0.064477	1.1795	0.5279	1.6667	0.22294
	176.68	139.78	67.524	62.865	177.42	135.78	34.639		216.26	33.954	416.16	8.1327	66.892	18.758	42.483		201.9	201.9	369.93	42.483	39.068	132.38	97.814	107.94	119.11	33.828		0.23569	0.45103	0.43629	0.33426	0.42654	0.16901	0.095444		0.86267	0.66678	0.87178	0.30554	0.42745	0.17578	0.30424		0.5312	0.061539	0.73315	1.757	2.3116	0.39772
	225.85	169.56	72.289	65.581	146.84	118.41	48.351		174.03	23.227	401.76	12.912	85.421	19.269	43.07		231.61	231.61	445.86	43.07	40.336	153.23	92.138	98.915	97.954	30.78		0.11021	0.58979	0.42013	0.19165	0.96755	0.25097	0.074376		1.7573	0.056893	1.1858	0.13908	0.79201	0.30897	1.0974		0.75099	1.8916	0.086498	1.4538	1.8143	0.11002
	267.41	186.96	78.243	58.56	109.33	102.05	63.337		134.53	16.585	380.86	18.04	99.849	20.67	43.534		253.76	253.76	501.37	43.534	41.534	171.55	88.694	88.734	81.457	30.177		0.1284	0.64062	2.3544	0.37272	0.23907	0.46273	0.55217		0.71339	0.28129	2.5196	0.13547	0.11805	0.17915	1.1118		0.2631	0.75126	1.0502	0.65948	1.2154	0.72967
	290.07	188.73	83.953	43.97	73.938	84.565	76.157		108.25	17.782	356.38	21.905	104.13	23.242	43.489		261.59	261.59	516.41	43.489	43.022	182.11	87.982	79.826	77.004	33.124		0.4368	0.96247	1.3798	0.54272	0.024913	0.24428	0.53418		0.31656	0.079425	1.8003	0.19915	0.20787	0.19235	0.1435		1.5625	0.17574	0.40047	0.17214	0.30753	0.10955
	288.93	180.43	87.982	27.587	49.699	64.013	83.372		96.661	28.924	322.71	24.866	93.995	26.973	42.217		249.17	249.17	474.69	42.217	44.872	179.98	87.52	70.985	91.204	40.008		0.13411	0.38472	0.58832	1.2084	0.16294	0.20728	0.2639		0.23447	0.15082	0.83334	0.4381	0.15484	0.23403	0.067371		0.91344	0.29298	0.26738	0.30975	0.17209	0.073615
	271.54	166.87	88.895	15.186	38.758	43.568	82.799		92.777	47.51	277.91	27.998	73.487	31.679	39.978		221	221	389.58	39.978	46.538	168.63	86.975	60.594	119.13	50.094		0.95621	0.12376	0.53998	0.56089	0.18875	0.11117	0.18858		0.39474	0.78198	2.1865	0.44967	0.30769	0.41599	0.10889		1.1538	0.3288	1.2803	0.34378	0.86114	0.21444
	245.22	152.89	83.925	12.542	35.09	26.409	76.73		94.383	70.378	230.4	30.762	48.991	37.373	37.845		185.99	185.99	285.51	37.845	47.477	155.48	90.07	50.463	150.88	62.798		0.56188	0.71511	0.95158	0.78734	0.62315	0.067941	0.14343		0.40991	0.3212	0.3206	0.30125	0.14679	0.63187	0.21243		0.39796	0.24313	0.24395	0.10814	0.29363	0.063279
	217.27	143.32	74.027	22.624	35.477	15.713	68.441		99.264	94.368	188.57	32.62	26.894	44.069	36.894		153.03	153.03	186.91	36.894	47.144	147.93	100.53	42.399	176.54	77.539		0.9051	2.1772	0.17376	0.55477	0.47247	0.035405	0.25628		0.055622	0.24465	0.94139	0.18903	0.5188	0.51964	0.22598		0.27064	1.349	0.58971	0.24656	0.76189	0.27518
	195.02	138.67	63.354	41.582	36.701	13.915	61.205		105.2	116.32	160.86	33.033	13.584	51.778	38.198		131.02	131.02	118.21	38.198	44.853	153.39	122.07	38.212	186.19	93.736		0.4551	2.1218	0.69953	0.62632	0.57091	0.14552	0.44556		0.34345	0.63659	0.41541	0.5556	0.3545	0.12448	0.27668		0.39894	0.45422	0.027063	0.36682	0.56405	0.069497
	175.29	135.74	56.061	64.963	35.543	18.897	58.297		109.21	138.74	148.72	31.216	11.065	63.158	42.143		121.21	121.21	83.057	42.143	40.969	179.57	163.55	39.912	174.84	116.16		0.41875	0.88697	0.36736	0.39603	0.026977	0.21963	0.59483		0.76924	0.23198	0.63032	0.05085	0.42747	0.18342	0.56053		0.18892	1.0373	1.3811	0.48037	1.1405	0.11791
	110.99	115.43	47.092	180.38	26.547	183.26	109.27		267.78	52.487	302.12	57.068	116.54	25.96	73.316		181.07	181.07	69.011	73.316	51.506	83.607	157.65	141.81	183.46	40.904		0.63097	0.44159	0.39587	0.29755	0.61725	0.21696	0.37282		0.65684	0.12481	0.74611	0.24676	0.3927	0.22005	0.32489		0.32804	0.57259	0.24208	0.13064	0.43528	0.51732
	99.093	111.95	45.219	187.95	14.634	189.59	92.23		395.2	56.082	302.82	50.84	96.619	25.543	75.369		200.23	200.23	93.432	75.369	57.26	96.205	142.27	149.04	168.58	36.879		0.71409	0.55449	0.34348	1.1976	1.6042	0.20567	0.54204		0.57274	0.22055	0.60388	0.2094	0.24688	0.36477	0.23696		1.2894	0.8368	1.331	0.53299	0.42231	0.10667
	87.154	112.07	45.622	195.56	7.5915	186.12	72.211		504.69	60.325	298.8	46.185	77.933	25.065	76.544		214.9	214.9	117.1	76.544	62.647	106.22	131.82	152.87	153.95	33.601		0.43832	0.9507	0.71816	0.12645	0.442	0.24516	0.13397		0.4375	0.98466	0.33503	0.32753	0.26994	0.35729	0.23651		0.21599	0.51116	2.4378	0.69973	1.1601	0.53484
	78.961	119.31	47.794	203.57	3.7808	167.19	54.127		567.03	62.251	287.33	44.96	63.495	24.622	76.218		217.17	217.17	133.76	76.218	68.851	109.57	132.57	151.69	143.65	31.15		0.098045	0.72877	0.31337	0.1908	0.38999	0.2163	0.31199		0.78282	0.97167	0.086087	0.063019	0.45936	0.29033	0.17255		0.55089	0.18723	0.797	0.24437	3.0882	0.38487
	74.419	133.35	51.231	208.63	1.5651	135.41	42.888		571.05	61.572	262.3	49	53.054	24.112	73.767		202.88	202.88	142.76	73.767	76.251	102.3	150.9	143.61	138.77	29.088		0.28457	0.57442	0.38341	0.2142	0.26772	0.12411	0.056252		2.287	0.25509	0.47147	0.17933	0.32448	0.22504	0.26714		0.032362	0.56436	0.73962	0.77475	2.1425	0.44829
	71.005	148.88	55.426	207.41	1.4927	99.252	40.515		536.21	60.266	225.51	57.068	44.601	23.47	69.606		177.29	177.29	148.27	69.606	83.07	87.126	182.67	129.7	136.62	27.359		1.0827	0.6981	0.19966	0.24866	0.22293	0.18307	0.51631		0.58969	0.79051	0.66948	0.031312	0.13223	0.17131	0.34998		0.58607	0.42287	0.69938	0.84802	0.1171	0.080067
	68.861	160.63	62.137	196.54	4.6552	67.204	43.734		479.28	58.764	186.14	66.411	38.514	22.85	64.671		146.65	146.65	151.27	64.671	87.527	69.989	218.26	112.8	135.52	26.624		1.1391	0.73756	0.21267	0.44884	0.26504	0.10665	0.22373		0.57782	1.1482	0.7059	0.10443	0.89792	0.25427	0.18702		0.74618	0.46755	0.024846	0.31659	0.89247	0.24701
	68.128	163.3	71.702	170.15	10.23	47.753	49.513		417.06	57.494	153.38	74.275	35.17	22.407	59.9		117.21	117.21	152.73	59.9	87.845	56.812	248.04	95.758	133.79	27.542		0.94969	0.24681	0.49333	0.72705	0.14549	0.14291	0.56535		0.5979	0.31532	0.79523	0.18077	0.35785	0.27168	0.73001		0.33279	0.29078	0.233	0.31116	1.1248	0.41514
	68.95	153.97	81.483	130.47	17.394	43.045	54.823		366.33	56.887	136.41	77.907	34.945	22.297	56.229		95.2	95.2	153.62	56.229	82.144	53.526	262.4	81.41	129.77	30.773		0.24732	0.66193	0.67659	0.26151	1.0021	0.10482	0.49576		0.41861	0.67897	0.42614	0.2715	0.53528	0.27357	0.17214		0.31163	0.58023	0.418	0.23692	1.2697	0.15207
	71.57	136.17	88.843	86.321	25.325	47.421	56.631		321.91	57.214	137.66	76.584	40.346	22.766	53.799		79.904	79.904	151.8	53.799	71.611	64.515	256.72	67.864	121.2	38.339		1.1515	0.30611	0.52575	0.21686	0.84799	0.051682	0.37701		0.58699	0.65771	1.1657	0.33732	0.29119	0.19094	0.57832		0.62498	1.004	1.4453	0.22313	2.8879	0.1116
	75.893	114.29	91.145	46.528	33.049	57.665	54.13		272.64	58.19	151	72.139	51.121	23.712	51.985		67.156	67.156	146.61	51.985	59.063	85.827	237.41	53.227	109.2	49.8		0.94665	1.4805	0.26591	0.74513	0.92164	0.12898	0.4612		1.4958	0.30074	0.68443	0.46108	0.86218	0.24295	0.60072		0.33055	0.42646	1.4872	0.30273	1.2011	0.081629
	81.554	92.689	85.938	19.912	41.115	70.561	49.341		226.24	59.405	172.79	65.661	63.511	24.764	50.577		58.046	58.046	141.29	50.577	47.318	110.88	211.41	40.338	97.143	62.123		1.831	0.21903	0.43513	0.34239	0.50559	0.20507	1.1357		1.1442	0.64414	2.2886	0.273	0.68744	0.264	0.31729		0.090937	0.48415	1.2294	0.27776	0.94641	0.11424
	88.185	75.764	74.982	8.5903	50.983	82.891	43.475		190.44	60.452	199.4	58.236	73.757	25.55	49.363		53.663	53.663	139.07	49.363	39.192	133.11	185.63	32.035	88.393	72.274		0.5474	0.94726	0.1581	0.81199	0.55989	0.22797	0.44216		0.74752	1.0839	2.4101	0.23272	0.43294	0.27685	0.40896		1.5088	0.48789	0.96708	0.22375	1.7393	0.42214
	95.418	61.848	61.95	6.6815	64.114	97.362	37.743		172.99	60.923	227.16	50.954	78.1	25.702	48.133		55.098	55.098	143.17	48.133	35.309	145.91	167.02	31.156	86.318	77.221		0.16964	0.17429	0.83377	1.6397	0.85546	0.28417	0.93365		0.56149	0.42218	1.4348	0.3402	0.51672	0.36896	0.079524		0.31151	0.54434	2.4803	0.18197	0.95181	0.25646
	103.34	48.021	50.516	11.009	81.969	116.12	33.356		184.33	61.175	261.54	42.69	73.424	24.961	46.883		63.642	63.642	152.55	46.883	33.793	145.44	156.68	41.892	94.6	75.339		0.30877	1.4901	0.43416	0.30396	1.011	0.10267	0.15749		0.67021	0.35442	0.87415	0.22436	0.42279	0.33932	0.34976		0.50793	0.78785	0.24055	0.36146	2.33	0.22954
	112.2	36.777	44.352	18.396	111.42	135.1	29.287		219.31	61.479	304.97	32.718	62.234	23.574	45.752		78.569	78.569	165.03	45.752	33.705	136.07	150.01	62.352	110.99	68.651
	121.86	30.61	44.796	25.666	151.5	150.25	24.727		262.25	61.3	349.26	22.725	49.206	21.928	44.747		97.941	97.941	182.22	44.747	34.11	123.61	145.31	86.248	129.97	59.592
	132.2	32.015	49.398	35.451	191.9	157.51	21.219		297.45	60.103	386.24	14.397	39.013	20.409	43.875		119.82	119.82	205.72	43.875	34.072	113.85	140.93	107.29	146.03	50.6
	143.08	45.041	56.154	49.87	222.29	155.31	20.305		309.24	57.353	407.72	9.4194	36.332	19.404	43.143		142.27	142.27	237.13	43.143	33.574	112.6	135.17	119.2	153.63	44.111
	155.24	68.026	63.06	64.973	232.36	146.36	23.527		289.85	50.628	411.2	8.7545	45.24	18.576	42.662		169.78	169.78	289.08	42.662	33.241	123.71	126.53	120.24	148.81	39.432
	168.79	94.894	68.115	76.812	214.19	133.01	33.725		249.73	40.285	402.13	11.278	62.622	17.667	42.429		203.65	203.65	360.51	42.429	33.096	143.33	116.12	114.58	135.23	34.938
	182.59	119.57	71.55	81.438	174.65	117.59	49.872		200.54	29.956	384.28	15.547	82.358	17.183	42.274		237.14	237.14	432.46	42.274	33.165	165.66	106.22	104.85	118.87	31.669
	195.53	135.99	74.701	74.69	125.64	102.46	67.706		153.92	23.273	361.37	20.12	98.332	17.629	42.028		263.48	263.48	485.97	42.028	33.472	184.88	99.098	93.658	105.71	30.665
	206.47	142.26	77.219	59.202	79.027	85.393	82.966		121.54	23.868	337.16	23.552	104.42	19.512	41.523		275.94	275.94	502.07	41.523	34.202	195.22	97.036	83.62	101.72	32.965
	217.54	142.44	78.753	41.213	46.695	64.822	91.391		104.59	33.564	307.21	26.214	96.748	22.928	39.848		269.7	269.7	466.73	39.848	35.339	191.68	97.302	73.168	111.86	38.805
	229.5	139.34	78.952	26.964	30.744	44.081	90.412		95.304	49.942	269.03	29.068	79.382	27.539	37.117		249.26	249.26	392.6	37.117	36.605	178.15	98.378	60.56	132.17	47.492
	239.15	135.79	76.053	22.695	23.254	26.504	82.869		91.88	70.264	229.27	31.56	58.157	33.201	34.694		221.83	221.83	300.72	34.694	37.723	162.07	104.36	48.146	155.18	58.672
	243.3	134.62	70.288	31.456	21.075	15.422	72.617		92.516	91.792	194.57	33.133	38.904	39.77	33.941		194.65	194.65	212.13	33.941	38.415	150.91	119.35	38.276	173.42	71.99
	238.78	137.06	64.304	49.085	21.057	13.121	63.511		95.408	111.79	171.58	33.233	27.454	47.102	36.222		174.92	174.92	147.87	36.222	38.643	152.1	147.44	33.303	179.43	87.092
	219.59	141.24	60.748	71.011	20.05	17.378	59.404		98.133	132.71	161.99	30.914	25.6	57.531	42.864		162.36	162.36	108.98	42.864	38.592	172.43	200.36	35.627	169.5	108.49
	187.85	145.28	62.265	92.659	17.802	24.768	62.699		101.89	156.39	161.37	26.546	29.456	71.154	52.956		152.15	152.15	81.428	52.956	38.319	206.92	275.39	43.682	148.59	136.42
	152.56	147.35	71.373	109.46	16.414	31.862	70.828		110.32	179.13	167.18	21.548	36.33	84.468	64.511		144.73	144.73	63.663	64.511	37.881	245.41	354.92	53.865	122.28	164.11
	122.68	145.57	86.308	121.86	16.263	35.236	80.185		127.06	197.25	176.88	17.34	43.531	93.974	75.538		140.54	140.54	54.125	75.538	37.337	277.78	421.36	62.57	96.178	184.8
	107.19	137.48	103.29	132.91	17.725	33.91	87.167		155.74	207.06	187.92	15.34	48.369	96.172	84.049		140.03	140.03	51.256	84.049	36.507	293.85	457.09	66.193	75.852	191.72
	111.82	124.3	118.55	141.93	21.177	30.169	88.17		207.5	207.4	202.57	16.018	51.233	87.811	90.436		146.53	146.53	59.574	90.436	35.351	285.25	454.22	61.841	59.864	179.6
	89.159	171.91	77.634	111.36	154.8	118.57	103.09		91.405	86.679	318.91	61.504	146.75	23.43	55.679		165.18	165.18	74.291	55.679	26.929	106.64	175.36	104.64	161.64	65.369
	116.64	151.52	68.421	120.62	116.63	129.21	114.7		92.88	65.72	329.06	58.861	140.63	25.358	59.52		158.91	158.91	54.149	59.52	28.859	110.19	173.33	113.66	182.41	59.282
	132.28	142.8	61.027	129.86	81.35	141.26	122.55		114.19	52.139	335.08	55.978	132.98	26.501	62.821		160.33	160.33	45.715	62.821	34.74	110.53	170.96	120.72	192.88	53.865
	133.12	140.44	55.223	139.02	53.956	155.03	124		168.78	47.974	337.41	52.043	122.62	26.602	65.974		176.25	176.25	53.667	65.974	44.333	107.69	166.2	126.64	189.76	48.64
	124.64	141.28	50.78	148.03	35.206	167.15	115.91		250.96	50.177	336.88	46.998	109.28	25.993	69.343		205.49	205.49	73.61	69.343	55.286	104.67	158.02	132.22	177.47	42.713
	111.3	142.13	47.614	156.84	21.776	174.24	100.07		340.57	55.691	332.82	42.057	94.723	25.062	72.343		237.85	237.85	98.529	72.343	65.248	101.44	149.49	136.22	160.97	36.797
	97.553	139.82	45.876	168.8	12.523	172.91	81.147		417.44	61.455	324.53	38.435	80.711	24.193	74.39		263.17	263.17	121.41	74.39	71.87	97.965	143.7	137.42	145.17	31.609
	87.846	134.1	45.695	183.95	6.3051	158.37	63.827		461.43	64.413	311.33	37.349	69.011	23.773	74.896		271.25	271.25	135.24	74.896	74.751	94.194	143.74	134.59	135.03	27.864
	81.928	127.07	47.2	197.26	1.9799	132.88	52.788		464.37	64.223	288.17	40.096	58.802	23.969	73.364		256.91	256.91	136.87	73.364	75.459	88.365	153.22	126.06	132.27	25.168
	76.831	119.14	50.519	203.71	-0.21207	103.62	49.777		439.72	62.924	255.52	45.866	48.908	24.525	70.184		226.92	226.92	130.99	70.184	74.592	80.502	170.08	112.65	133.6	23.045
	72.936	110.68	57.825	198.27	0.49061	77.789	51.675		399.69	61.028	220.94	52.712	40.559	25.188	66.104		189.09	189.09	122.3	66.104	72.751	73.259	188.91	96.865	136.43	22.084
	70.619	102.09	69.032	174.73	3.7273	62.577	55.859		356.5	59.046	191.99	58.684	34.984	25.706	61.872		151.21	151.21	115.52	61.872	70.534	69.285	204.27	81.194	138.15	22.876
	70.26	93.063	80.881	136.43	9.1376	60.217	59.71		322.37	57.49	176.25	61.834	33.413	25.828	58.236		121.08	121.08	115.36	58.236	67.583	71.231	210.74	68.138	136.14	26.009
	71.563	83.349	90.113	92.709	16.361	65.915	60.605		293.39	56.117	175.94	61.871	38.528	25.434	55.02		96.396	96.396	123.64	55.02	63.499	82.517	204.94	55.84	127.61	33.465
	74.275	73.391	93.47	52.865	24.525	76.321	57.9		261.4	54.587	186.01	60.094	49.508	24.69	51.725		71.965	71.965	137.23	51.725	58.818	101.38	190.48	42.634	114.28	44.849
	78.84	63.636	88.232	26.215	33.869	88.084	53.343		232.28	53.263	203.13	56.94	62.331	23.778	48.616		51.233	51.233	153.38	48.616	54.081	122.68	172.44	31.307	100.38	57.192
	85.704	54.53	76.571	14.383	45.704	97.854	47.9		211.93	52.509	223.97	52.846	72.978	22.879	45.955		37.65	37.65	169.35	45.955	49.825	141.29	155.9	24.646	90.112	67.524
	95.311	44.404	62.567	11.161	61.336	107.07	42.538		206.22	52.69	245.23	48.249	77.425	22.176	44.005		34.663	34.663	182.42	44.005	45.944	152.09	145.92	25.437	87.699	72.875
	110.87	32.96	50.3	14.112	82.074	117.98	38.224		225.1	54.799	271.4	42.127	72.535	21.766	43.035		45.227	45.227	189.11	43.035	42.077	151.58	144.93	38.1	96.893	71.802
	132.09	22.703	43.852	20.8	115.73	128.4	33.809		264.62	58.59	304.72	34.189	60.989	21.53	42.867		67.04	67.04	191.26	42.867	38.387	143.17	149.56	60.777	114.88	66.285
	154.15	16.134	44.875	28.79	161.42	136.18	28.649		309.91	62.578	338.4	25.968	47.494	21.318	43.102		95.675	95.675	194.05	43.102	35.034	132.11	156.15	86.839	136.04	58.488
	172.24	15.758	50.647	41.512	207.44	139.14	24.466		346.05	65.275	365.66	18.996	36.759	20.98	43.339		126.7	126.7	202.68	43.339	32.18	123.66	161.09	109.66	154.73	50.579
	181.53	23.982	58.691	60.59	242.08	136.44	22.982		358.16	65.191	379.72	14.804	33.493	20.369	43.18		155.7	155.7	222.35	43.18	29.816	123.07	160.73	122.61	165.33	44.722
	176.62	39.137	66.529	80.879	253.64	129.53	25.921		338.27	60.041	377.61	14.139	41.185	18.811	42.596		186.31	186.31	263.74	42.596	27.837	134.09	151.51	123.75	165.17	40.249
	160.71	57.612	71.683	97.233	233.05	119.67	36.244		296.29	50.817	363.87	15.978	56.696	16.408	41.854		221.48	221.48	323.39	41.854	26.252	153.23	135.85	117.52	157.99	35.715
	141.93	75.796	73.872	104.51	188.14	108.14	52.802		244.2	40.948	342.92	19.204	74.792	14.165	40.995		255.74	255.74	385.27	40.995	25.073	174.84	119.1	106.8	147.81	32.125
	128.4	90.078	74.75	98.313	132.47	96.204	71.153		193.95	33.864	319.22	22.701	90.238	13.09	40.061		283.64	283.64	433.34	40.061	24.311	193.29	106.62	94.481	138.65	30.483
	128.24	99.92	74.736	82.079	79.604	82.018	86.854		157.52	32.995	297.2	25.35	97.8	14.189	39.093		299.69	299.69	451.56	39.093	23.821	202.93	103.77	83.46	134.51	31.792
	149.83	107.73	74.246	62.391	43.108	64.732	95.462		135.23	39.628	274.11	27.554	94.726	18.054	36.868		300.94	300.94	430.64	36.868	23.593	199.61	108.23	71.969	137.87	36.231
	187.77	114.31	73.7	45.832	25.136	47.121	94.331		119.13	51.475	246.99	30.057	84.507	24.012	33.358		291.02	291.02	381.27	33.358	23.849	187.1	116.45	58.079	146.05	43.13
	229.47	120.48	72.055	38.986	16.642	31.957	86.422		108.69	66.607	219.98	32.258	71.269	31.179	30.398		274.4	274.4	317.39	30.398	24.807	171.61	131.88	44.441	155.35	52.223
	262.36	127.03	69.034	44.659	14.4	22.011	75.705		103.38	83.095	197.2	33.554	59.137	38.669	29.824		255.53	255.53	252.95	29.824	26.686	159.35	157.98	33.705	162.05	63.242
	273.86	135.82	66.197	58.461	15.179	18.899	66.15		102.71	99.008	182.81	33.344	52.238	45.597	33.472		238.86	238.86	201.9	33.472	30.426	156.54	198.2	28.52	162.43	75.92
	255.58	146.32	65.109	76.185	15.75	20.77	61.726		106.01	116.66	178.89	30.467	51.775	53.329	43.8		221.95	221.95	161.39	43.8	35.879	168.18	268.14	31.56	154.49	93.765
	215.9	155.74	67.331	93.622	16.648	25.205	64.983		113.65	137.35	182.68	25.325	54.996	62.454	59.585		201.81	201.81	122.13	59.585	41.639	190.14	365.48	41.059	140.7	116.95
	167.42	161.3	74.427	106.57	20.027	29.786	73.275		126.57	157.58	191.05	19.658	60.099	70.926	77.139		182.14	182.14	88.375	77.139	46.296	214.89	466.86	53.005	124.07	140.23
	122.7	160.23	85.356	114.72	25.084	32.09	82.777		145.75	173.9	200.84	15.209	65.279	76.695	92.769		166.63	166.63	64.405	92.769	48.443	234.94	548.88	63.39	107.62	158.32
	94.338	148.03	97.772	120.88	31.015	31.722	89.666		172.16	182.82	208.93	13.719	68.734	77.715	102.79		158.95	158.95	54.483	102.79	46.848	242.76	588.18	68.204	94.339	165.97
	85.896	126.55	109.33	125.51	37.016	30.294	90.119		214.94	183.22	213.29	16.124	70.985	71.868	106.23		162.79	162.79	65.249	106.23	42.449	231.03	571.75	64.434	83.457	159.77
	51.298	90.309	61.227	33.118	131.65	164.59	25.094		213.04	56.335	362.64	10.902	53.919	21.838	42.021		162.98	162.98	177.31	42.021	37.477	98.936	106.92	92.958	137.86	45.345
	66.678	179.93	60.987	206.39	12.53	93.804	32.064		585.27	61.527	202.07	61.692	43.266	22.984	68.117		143.87	143.87	165.1	68.117	92.056	91.263	188.17	139.59	142.49	31.748
	66.439	213.59	66.917	193.6	19.868	65.744	36.947		522.24	60.232	161.82	71.963	40.156	21.694	63.895		118.9	118.9	176.27	63.895	101.79	69.968	233.03	121.88	137.47	31.06
	67.398	228.92	75.471	168.01	29.234	48.735	44.443		452.14	59.245	128.46	80.555	39.519	20.775	59.885		95.823	95.823	183.35	59.885	104.38	52.616	270.81	103.95	132.17	31.827
	69.53	220.33	84.27	131.02	39.08	44.438	51.205		393.23	58.898	111.69	84.387	40.719	20.593	56.86		79.631	79.631	184.61	56.86	96.8	46.58	289.66	88.9	125.94	34.734
	73.722	195.3	90.933	90.308	47.857	48	53.889		339.18	59.639	113.94	82.615	45.854	21.613	55.059		70.321	70.321	175.13	55.059	81.489	56.395	284.44	75.001	116.96	41.673
	79.991	162.21	93.083	53.538	54.467	56.935	51.39		277.83	61.246	128.73	77.292	55.348	23.59	53.97		64.563	64.563	156.06	53.97	62.98	77.145	263.04	60.164	105.65	52.185
	87.005	129.42	88.64	28.382	59.941	68.754	45.94		218.67	63.048	152.43	69.685	66.053	25.827	53.229		62.365	62.365	134.78	53.229	45.809	102.03	233.18	47.008	94.764	63.437
	93.437	105.3	79.192	16.756	65.929	80.969	39.193		171.17	64.372	181.4	61.06	74.824	27.628	52.475		63.731	63.731	118.68	52.475	34.511	124.25	202.58	38.152	87.024	72.591
	97.956	88.308	67.855	13.549	74.079	96.74	32.802		144.81	64.546	212.01	52.682	78.514	28.296	51.347		68.668	68.668	115.17	51.347	30.156	136.99	178.95	36.214	85.165	76.813
	97.166	72.861	57.745	15.882	86.043	117.72	28.421		150.03	63.658	250.03	43.314	74.344	27.357	49.632		78.016	78.016	124.77	49.632	29.722	136.51	162.39	45.018	92.886	74.497
	91.954	61.282	51.979	20.88	106.88	139.18	25.445		180.49	62.154	297.89	32.112	64.411	25.275	47.573		91.773	91.773	142.56	47.573	31.601	127.35	147.75	62.818	108.36	67.533
	87.414	55.897	51.369	25.665	135.48	156.38	22.771		220.57	59.906	346.92	20.933	52.886	22.761	45.485		108.68	108.68	167.73	45.485	34.188	115.13	134.89	83.88	126.05	58.33
	88.639	59.029	53.838	32.407	164.27	164.57	21.307		254.62	56.782	388.46	11.633	43.937	20.529	43.686		127.46	127.46	199.48	43.686	35.875	105.47	123.65	102.47	140.41	49.294
	100.72	76.211	58.167	43.024	185.66	161.8	21.961		267.01	52.652	413.86	6.0685	41.734	19.29	42.492		146.86	146.86	236.99	42.492	36.733	104.01	113.87	112.84	145.88	42.835
	131.2	105.89	63.136	54.261	192.05	151.22	25.64		250.75	45.014	421.17	5.3143	50.313	18.858	42.161		171.4	171.4	293.63	42.161	37.832	114.23	105.22	113.4	137.55	38.215
	176.68	139.78	67.524	62.865	177.42	135.78	34.639		216.26	33.954	416.16	8.1327	66.892	18.758	42.483		201.9	201.9	369.93	42.483	39.068	132.38	97.814	107.94	119.11	33.828
	225.85	169.56	72.289	65.581	146.84	118.41	48.351		174.03	23.227	401.76	12.912	85.421	19.269	43.07		231.61	231.61	445.86	43.07	40.336	153.23	92.138	98.915	97.954	30.78
	267.41	186.96	78.243	58.56	109.33	102.05	63.337		134.53	16.585	380.86	18.04	99.849	20.67	43.534		253.76	253.76	501.37	43.534	41.534	171.55	88.694	88.734	81.457	30.177
	290.07	188.73	83.953	43.97	73.938	84.565	76.157		108.25	17.782	356.38	21.905	104.13	23.242	43.489		261.59	261.59	516.41	43.489	43.022	182.11	87.982	79.826	77.004	33.124
	288.93	180.43	87.982	27.587	49.699	64.013	83.372		96.661	28.924	322.71	24.866	93.995	26.973	42.217		249.17	249.17	474.69	42.217	44.872	179.98	87.52	70.985	91.204	40.008
	271.54	166.87	88.895	15.186	38.758	43.568	82.799		92.777	47.51	277.91	27.998	73.487	31.679	39.978		221	221	389.58	39.978	46.538	168.63	86.975	60.594	119.13	50.094
	245.22	152.89	83.925	12.542	35.09	26.409	76.73		94.383	70.378	230.4	30.762	48.991	37.373	37.845		185.99	185.99	285.51	37.845	47.477	155.48	90.07	50.463	150.88	62.798
	217.27	143.32	74.027	22.624	35.477	15.713	68.441		99.264	94.368	188.57	32.62	26.894	44.069	36.894		153.03	153.03	186.91	36.894	47.144	147.93	100.53	42.399	176.54	77.539
	195.02	138.67	63.354	41.582	36.701	13.915	61.205		105.2	116.32	160.86	33.033	13.584	51.778	38.198		131.02	131.02	118.21	38.198	44.853	153.39	122.07	38.212	186.19	93.736
	175.29	135.74	56.061	64.963	35.543	18.897	58.297		109.21	138.74	148.72	31.216	11.065	63.158	42.143		121.21	121.21	83.057	42.143	40.969	179.57	163.55	39.912	174.84	116.16
	110.99	115.43	47.092	180.38	26.547	183.26	109.27		267.78	52.487	302.12	57.068	116.54	25.96	73.316		181.07	181.07	69.011	73.316	51.506	83.607	157.65	141.81	183.46	40.904
	99.093	111.95	45.219	187.95	14.634	189.59	92.23		395.2	56.082	302.82	50.84	96.619	25.543	75.369		200.23	200.23	93.432	75.369	57.26	96.205	142.27	149.04	168.58	36.879
	87.154	112.07	45.622	195.56	7.5915	186.12	72.211		504.69	60.325	298.8	46.185	77.933	25.065	76.544		214.9	214.9	117.1	76.544	62.647	106.22	131.82	152.87	153.95	33.601
	78.961	119.31	47.794	203.57	3.7808	167.19	54.127		567.03	62.251	287.33	44.96	63.495	24.622	76.218		217.17	217.17	133.76	76.218	68.851	109.57	132.57	151.69	143.65	31.15
	74.419	133.35	51.231	208.63	1.5651	135.41	42.888		571.05	61.572	262.3	49	53.054	24.112	73.767		202.88	202.88	142.76	73.767	76.251	102.3	150.9	143.61	138.77	29.088
	71.005	148.88	55.426	207.41	1.4927	99.252	40.515		536.21	60.266	225.51	57.068	44.601	23.47	69.606		177.29	177.29	148.27	69.606	83.07	87.126	182.67	129.7	136.62	27.359
	68.861	160.63	62.137	196.54	4.6552	67.204	43.734		479.28	58.764	186.14	66.411	38.514	22.85	64.671		146.65	146.65	151.27	64.671	87.527	69.989	218.26	112.8	135.52	26.624
	68.128	163.3	71.702	170.15	10.23	47.753	49.513		417.06	57.494	153.38	74.275	35.17	22.407	59.9		117.21	117.21	152.73	59.9	87.845	56.812	248.04	95.758	133.79	27.542
	68.95	153.97	81.483	130.47	17.394	43.045	54.823		366.33	56.887	136.41	77.907	34.945	22.297	56.229		95.2	95.2	153.62	56.229	82.144	53.526	262.4	81.41	129.77	30.773
	71.57	136.17	88.843	86.321	25.325	47.421	56.631		321.91	57.214	137.66	76.584	40.346	22.766	53.799		79.904	79.904	151.8	53.799	71.611	64.515	256.72	67.864	121.2	38.339
	75.893	114.29	91.145	46.528	33.049	57.665	54.13		272.64	58.19	151	72.139	51.121	23.712	51.985		67.156	67.156	146.61	51.985	59.063	85.827	237.41	53.227	109.2	49.8
	81.554	92.689	85.938	19.912	41.115	70.561	49.341		226.24	59.405	172.79	65.661	63.511	24.764	50.577		58.046	58.046	141.29	50.577	47.318	110.88	211.41	40.338	97.143	62.123
	88.185	75.764	74.982	8.5903	50.983	82.891	43.475		190.44	60.452	199.4	58.236	73.757	25.55	49.363		53.663	53.663	139.07	49.363	39.192	133.11	185.63	32.035	88.393	72.274
	95.418	61.848	61.95	6.6815	64.114	97.362	37.743		172.99	60.923	227.16	50.954	78.1	25.702	48.133		55.098	55.098	143.17	48.133	35.309	145.91	167.02	31.156	86.318	77.221
	103.34	48.021	50.516	11.009	81.969	116.12	33.356		184.33	61.175	261.54	42.69	73.424	24.961	46.883		63.642	63.642	152.55	46.883	33.793	145.44	156.68	41.892	94.6	75.339
	112.2	36.777	44.352	18.396	111.42	135.1	29.287		219.31	61.479	304.97	32.718	62.234	23.574	45.752		78.569	78.569	165.03	45.752	33.705	136.07	150.01	62.352	110.99	68.651
	121.86	30.61	44.796	25.666	151.5	150.25	24.727		262.25	61.3	349.26	22.725	49.206	21.928	44.747		97.941	97.941	182.22	44.747	34.11	123.61	145.31	86.248	129.97	59.592
	132.2	32.015	49.398	35.451	191.9	157.51	21.219		297.45	60.103	386.24	14.397	39.013	20.409	43.875		119.82	119.82	205.72	43.875	34.072	113.85	140.93	107.29	146.03	50.6
	143.08	45.041	56.154	49.87	222.29	155.31	20.305		309.24	57.353	407.72	9.4194	36.332	19.404	43.143		142.27	142.27	237.13	43.143	33.574	112.6	135.17	119.2	153.63	44.111
	155.24	68.026	63.06	64.973	232.36	146.36	23.527		289.85	50.628	411.2	8.7545	45.24	18.576	42.662		169.78	169.78	289.08	42.662	33.241	123.71	126.53	120.24	148.81	39.432
	168.79	94.894	68.115	76.812	214.19	133.01	33.725		249.73	40.285	402.13	11.278	62.622	17.667	42.429		203.65	203.65	360.51	42.429	33.096	143.33	116.12	114.58	135.23	34.938
	182.59	119.57	71.55	81.438	174.65	117.59	49.872		200.54	29.956	384.28	15.547	82.358	17.183	42.274		237.14	237.14	432.46	42.274	33.165	165.66	106.22	104.85	118.87	31.669
	195.53	135.99	74.701	74.69	125.64	102.46	67.706		153.92	23.273	361.37	20.12	98.332	17.629	42.028		263.48	263.48	485.97	42.028	33.472	184.88	99.098	93.658	105.71	30.665
	206.47	142.26	77.219	59.202	79.027	85.393	82.966		121.54	23.868	337.16	23.552	104.42	19.512	41.523		275.94	275.94	502.07	41.523	34.202	195.22	97.036	83.62	101.72	32.965
	217.54	142.44	78.753	41.213	46.695	64.822	91.391		104.59	33.564	307.21	26.214	96.748	22.928	39.848		269.7	269.7	466.73	39.848	35.339	191.68	97.302	73.168	111.86	38.805
	229.5	139.34	78.952	26.964	30.744	44.081	90.412		95.304	49.942	269.03	29.068	79.382	27.539	37.117		249.26	249.26	392.6	37.117	36.605	178.15	98.378	60.56	132.17	47.492
	239.15	135.79	76.053	22.695	23.254	26.504	82.869		91.88	70.264	229.27	31.56	58.157	33.201	34.694		221.83	221.83	300.72	34.694	37.723	162.07	104.36	48.146	155.18	58.672
	243.3	134.62	70.288	31.456	21.075	15.422	72.617		92.516	91.792	194.57	33.133	38.904	39.77	33.941		194.65	194.65	212.13	33.941	38.415	150.91	119.35	38.276	173.42	71.99
	238.78	137.06	64.304	49.085	21.057	13.121	63.511		95.408	111.79	171.58	33.233	27.454	47.102	36.222		174.92	174.92	147.87	36.222	38.643	152.1	147.44	33.303	179.43	87.092
	219.59	141.24	60.748	71.011	20.05	17.378	59.404		98.133	132.71	161.99	30.914	25.6	57.531	42.864		162.36	162.36	108.98	42.864	38.592	172.43	200.36	35.627	169.5	108.49
	187.85	145.28	62.265	92.659	17.802	24.768	62.699		101.89	156.39	161.37	26.546	29.456	71.154	52.956		152.15	152.15	81.428	52.956	38.319	206.92	275.39	43.682	148.59	136.42
	152.56	147.35	71.373	109.46	16.414	31.862	70.828		110.32	179.13	167.18	21.548	36.33	84.468	64.511		144.73	144.73	63.663	64.511	37.881	245.41	354.92	53.865	122.28	164.11
	122.68	145.57	86.308	121.86	16.263	35.236	80.185		127.06	197.25	176.88	17.34	43.531	93.974	75.538		140.54	140.54	54.125	75.538	37.337	277.78	421.36	62.57	96.178	184.8
	107.19	137.48	103.29	132.91	17.725	33.91	87.167		155.74	207.06	187.92	15.34	48.369	96.172	84.049		140.03	140.03	51.256	84.049	36.507	293.85	457.09	66.193	75.852	191.72
	111.82	124.3	118.55	141.93	21.177	30.169	88.17		207.5	207.4	202.57	16.018	51.233	87.811	90.436		146.53	146.53	59.574	90.436	35.351	285.25	454.22	61.841	59.864	179.6
	89.159	171.91	77.634	111.36	154.8	118.57	103.09		91.405	86.679	318.91	61.504	146.75	23.43	55.679		165.18	165.18	74.291	55.679	26.929	106.64	175.36	104.64	161.64	65.369
	116.64	151.52	68.421	120.62	116.63	129.21	114.7		92.88	65.72	329.06	58.861	140.63	25.358	59.52		158.91	158.91	54.149	59.52	28.859	110.19	173.33	113.66	182.41	59.282
	132.28	142.8	61.027	129.86	81.35	141.26	122.55		114.19	52.139	335.08	55.978	132.98	26.501	62.821		160.33	160.33	45.715	62.821	34.74	110.53	170.96	120.72	192.88	53.865
	133.12	140.44	55.223	139.02	53.956	155.03	124		168.78	47.974	337.41	52.043	122.62	26.602	65.974		176.25	176.25	53.667	65.974	44.333	107.69	166.2	126.64	189.76	48.64
	124.64	141.28	50.78	148.03	35.206	167.15	115.91		250.96	50.177	336.88	46.998	109.28	25.993	69.343		205.49	205.49	73.61	69.343	55.286	104.67	158.02	132.22	177.47	42.713
	111.3	142.13	47.614	156.84	21.776	174.24	100.07		340.57	55.691	332.82	42.057	94.723	25.062	72.343		237.85	237.85	98.529	72.343	65.248	101.44	149.49	136.22	160.97	36.797
	97.553	139.82	45.876	168.8	12.523	172.91	81.147		417.44	61.455	324.53	38.435	80.711	24.193	74.39		263.17	263.17	121.41	74.39	71.87	97.965	143.7	137.42	145.17	31.609
	87.846	134.1	45.695	183.95	6.3051	158.37	63.827		461.43	64.413	311.33	37.349	69.011	23.773	74.896		271.25	271.25	135.24	74.896	74.751	94.194	143.74	134.59	135.03	27.864
	81.928	127.07	47.2	197.26	1.9799	132.88	52.788		464.37	64.223	288.17	40.096	58.802	23.969	73.364		256.91	256.91	136.87	73.364	75.459	88.365	153.22	126.06	132.27	25.168
	76.831	119.14	50.519	203.71	-0.21207	103.62	49.777		439.72	62.924	255.52	45.866	48.908	24.525	70.184		226.92	226.92	130.99	70.184	74.592	80.502	170.08	112.65	133.6	23.045
	72.936	110.68	57.825	198.27	0.49061	77.789	51.675		399.69	61.028	220.94	52.712	40.559	25.188	66.104		189.09	189.09	122.3	66.104	72.751	73.259	188.91	96.865	136.43	22.084
	70.619	102.09	69.032	174.73	3.7273	62.577	55.859		356.5	59.046	191.99	58.684	34.984	25.706	61.872		151.21	151.21	115.52	61.872	70.534	69.285	204.27	81.194	138.15	22.876
	70.26	93.063	80.881	136.43	9.1376	60.217	59.71		322.37	57.49	176.25	61.834	33.413	25.828	58.236		121.08	121.08	115.36	58.236	67.583	71.231	210.74	68.138	136.14	26.009
	71.563	83.349	90.113	92.709	16.361	65.915	60.605		293.39	56.117	175.94	61.871	38.528	25.434	55.02		96.396	96.396	123.64	55.02	63.499	82.517	204.94	55.84	127.61	33.465
	74.275	73.391	93.47	52.865	24.525	76.321	57.9		261.4	54.587	186.01	60.094	49.508	24.69	51.725		71.965	71.965	137.23	51.725	58.818	101.38	190.48	42.634	114.28	44.849
	78.84	63.636	88.232	26.215	33.869	88.084	53.343		232.28	53.263	203.13	56.94	62.331	23.778	48.616		51.233	51.233	153.38	48.616	54.081	122.68	172.44	31.307	100.38	57.192
	85.704	54.53	76.571	14.383	45.704	97.854	47.9		211.93	52.509	223.97	52.846	72.978	22.879	45.955		37.65	37.65	169.35	45.955	49.825	141.29	155.9	24.646	90.112	67.524
	95.311	44.404	62.567	11.161	61.336	107.07	42.538		206.22	52.69	245.23	48.249	77.425	22.176	44.005		34.663	34.663	182.42	44.005	45.944	152.09	145.92	25.437	87.699	72.875
	110.87	32.96	50.3	14.112	82.074	117.98	38.224		225.1	54.799	271.4	42.127	72.535	21.766	43.035		45.227	45.227	189.11	43.035	42.077	151.58	144.93	38.1	96.893	71.802
	132.09	22.703	43.852	20.8	115.73	128.4	33.809		264.62	58.59	304.72	34.189	60.989	21.53	42.867		67.04	67.04	191.26	42.867	38.387	143.17	149.56	60.777	114.88	66.285
	154.15	16.134	44.875	28.79	161.42	136.18	28.649		309.91	62.578	338.4	25.968	47.494	21.318	43.102		95.675	95.675	194.05	43.102	35.034	132.11	156.15	86.839	136.04	58.488
	172.24	15.758	50.647	41.512	207.44	139.14	24.466		346.05	65.275	365.66	18.996	36.759	20.98	43.339		126.7	126.7	202.68	43.339	32.18	123.66	161.09	109.66	154.73	50.579
	181.53	23.982	58.691	60.59	242.08	136.44	22.982		358.16	65.191	379.72	14.804	33.493	20.369	43.18		155.7	155.7	222.35	43.18	29.816	123.07	160.73	122.61	165.33	44.722
	176.62	39.137	66.529	80.879	253.64	129.53	25.921		338.27	60.041	377.61	14.139	41.185	18.811	42.596		186.31	186.31	263.74	42.596	27.837	134.09	151.51	123.75	165.17	40.249
	160.71	57.612	71.683	97.233	233.05	119.67	36.244		296.29	50.817	363.87	15.978	56.696	16.408	41.854		221.48	221.48	323.39	41.854	26.252	153.23	135.85	117.52	157.99	35.715
	141.93	75.796	73.872	104.51	188.14	108.14	52.802		244.2	40.948	342.92	19.204	74.792	14.165	40.995		255.74	255.74	385.27	40.995	25.073	174.84	119.1	106.8	147.81	32.125
	128.4	90.078	74.75	98.313	132.47	96.204	71.153		193.95	33.864	319.22	22.701	90.238	13.09	40.061		283.64	283.64	433.34	40.061	24.311	193.29	106.62	94.481	138.65	30.483
	128.24	99.92	74.736	82.079	79.604	82.018	86.854		157.52	32.995	297.2	25.35	97.8	14.189	39.093		299.69	299.69	451.56	39.093	23.821	202.93	103.77	83.46	134.51	31.792
	149.83	107.73	74.246	62.391	43.108	64.732	95.462		135.23	39.628	274.11	27.554	94.726	18.054	36.868		300.94	300.94	430.64	36.868	23.593	199.61	108.23	71.969	137.87	36.231
	187.77	114.31	73.7	45.832	25.136	47.121	94.331		119.13	51.475	246.99	30.057	84.507	24.012	33.358		291.02	291.02	381.27	33.358	23.849	187.1	116.45	58.079	146.05	43.13
	229.47	120.48	72.055	38.986	16.642	31.957	86.422		108.69	66.607	219.98	32.258	71.269	31.179	30.398		274.4	274.4	317.39	30.398	24.807	171.61	131.88	44.441	155.35	52.223
	262.36	127.03	69.034	44.659	14.4	22.011	75.705		103.38	83.095	197.2	33.554	59.137	38.669	29.824		255.53	255.53	252.95	29.824	26.686	159.35	157.98	33.705	162.05	63.242
	273.86	135.82	66.197	58.461	15.179	18.899	66.15		102.71	99.008	182.81	33.344	52.238	45.597	33.472		238.86	238.86	201.9	33.472	30.426	156.54	198.2	28.52	162.43	75.92
	255.58	146.32	65.109	76.185	15.75	20.77	61.726		106.01	116.66	178.89	30.467	51.775	53.329	43.8		221.95	221.95	161.39	43.8	35.879	168.18	268.14	31.56	154.49	93.765
	215.9	155.74	67.331	93.622	16.648	25.205	64.983		113.65	137.35	182.68	25.325	54.996	62.454	59.585		201.81	201.81	122.13	59.585	41.639	190.14	365.48	41.059	140.7	116.95
	167.42	161.3	74.427	106.57	20.027	29.786	73.275		126.57	157.58	191.05	19.658	60.099	70.926	77.139		182.14	182.14	88.375	77.139	46.296	214.89	466.86	53.005	124.07	140.23
	122.7	160.23	85.356	114.72	25.084	32.09	82.777		145.75	173.9	200.84	15.209	65.279	76.695	92.769		166.63	166.63	64.405	92.769	48.443	234.94	548.88	63.39	107.62	158.32
	94.338	148.03	97.772	120.88	31.015	31.722	89.666		172.16	182.82	208.93	13.719	68.734	77.715	102.79		158.95	158.95	54.483	102.79	46.848	242.76	588.18	68.204	94.339	165.97
	85.896	126.55	109.33	125.51	37.016	30.294	90.119		214.94	183.22	213.29	16.124	70.985	71.868	106.23		162.79	162.79	65.249	106.23	42.449	231.03	571.75	64.434	83.457	159.77
	51.298	90.309	61.227	33.118	131.65	164.59	25.094		213.04	56.335	362.64	10.902	53.919	21.838	42.021		162.98	162.98	177.31	42.021	37.477	98.936	106.92	92.958	137.86	45.345
	66.678	179.93	60.987	206.39	12.53	93.804	32.064		585.27	61.527	202.07	61.692	43.266	22.984	68.117		143.87	143.87	165.1	68.117	92.056	91.263	188.17	139.59	142.49	31.748
	66.439	213.59	66.917	193.6	19.868	65.744	36.947		522.24	60.232	161.82	71.963	40.156	21.694	63.895		118.9	118.9	176.27	63.895	101.79	69.968	233.03	121.88	137.47	31.06
	67.398	228.92	75.471	168.01	29.234	48.735	44.443		452.14	59.245	128.46	80.555	39.519	20.775	59.885		95.823	95.823	183.35	59.885	104.38	52.616	270.81	103.95	132.17	31.827
	69.53	220.33	84.27	131.02	39.08	44.438	51.205		393.23	58.898	111.69	84.387	40.719	20.593	56.86		79.631	79.631	184.61	56.86	96.8	46.58	289.66	88.9	125.94	34.734
	73.722	195.3	90.933	90.308	47.857	48	53.889		339.18	59.639	113.94	82.615	45.854	21.613	55.059		70.321	70.321	175.13	55.059	81.489	56.395	284.44	75.001	116.96	41.673
	79.991	162.21	93.083	53.538	54.467	56.935	51.39		277.83	61.246	128.73	77.292	55.348	23.59	53.97		64.563	64.563	156.06	53.97	62.98	77.145	263.04	60.164	105.65	52.185
	87.005	129.42	88.64	28.382	59.941	68.754	45.94		218.67	63.048	152.43	69.685	66.053	25.827	53.229		62.365	62.365	134.78	53.229	45.809	102.03	233.18	47.008	94.764	63.437
	93.437	105.3	79.192	16.756	65.929	80.969	39.193		171.17	64.372	181.4	61.06	74.824	27.628	52.475		63.731	63.731	118.68	52.475	34.511	124.25	202.58	38.152	87.024	72.591
	97.956	88.308	67.855	13.549	74.079	96.74	32.802		144.81	64.546	212.01	52.682	78.514	28.296	51.347		68.668	68.668	115.17	51.347	30.156	136.99	178.95	36.214	85.165	76.813
	97.166	72.861	57.745	15.882	86.043	117.72	28.421		150.03	63.658	250.03	43.314	74.344	27.357	49.632		78.016	78.016	124.77	49.632	29.722	136.51	162.39	45.018	92.886	74.497
	91.954	61.282	51.979	20.88	106.88	139.18	25.445		180.49	62.154	297.89	32.112	64.411	25.275	47.573		91.773	91.773	142.56	47.573	31.601	127.35	147.75	62.818	108.36	67.533
	87.414	55.897	51.369	25.665	135.48	156.38	22.771		220.57	59.906	346.92	20.933	52.886	22.761	45.485		108.68	108.68	167.73	45.485	34.188	115.13	134.89	83.88	126.05	58.33
	88.639	59.029	53.838	32.407	164.27	164.57	21.307		254.62	56.782	388.46	11.633	43.937	20.529	43.686		127.46	127.46	199.48	43.686	35.875	105.47	123.65	102.47	140.41	49.294
	100.72	76.211	58.167	43.024	185.66	161.8	21.961		267.01	52.652	413.86	6.0685	41.734	19.29	42.492		146.86	146.86	236.99	42.492	36.733	104.01	113.87	112.84	145.88	42.835
	131.2	105.89	63.136	54.261	192.05	151.22	25.64		250.75	45.014	421.17	5.3143	50.313	18.858	42.161		171.4	171.4	293.63	42.161	37.832	114.23	105.22	113.4	137.55	38.215
	176.68	139.78	67.524	62.865	177.42	135.78	34.639		216.26	33.954	416.16	8.1327	66.892	18.758	42.483		201.9	201.9	369.93	42.483	39.068	132.38	97.814	107.94	119.11	33.828
	225.85	169.56	72.289	65.581	146.84	118.41	48.351		174.03	23.227	401.76	12.912	85.421	19.269	43.07		231.61	231.61	445.86	43.07	40.336	153.23	92.138	98.915	97.954	30.78
	267.41	186.96	78.243	58.56	109.33	102.05	63.337		134.53	16.585	380.86	18.04	99.849	20.67	43.534		253.76	253.76	501.37	43.534	41.534	171.55	88.694	88.734	81.457	30.177
	290.07	188.73	83.953	43.97	73.938	84.565	76.157		108.25	17.782	356.38	21.905	104.13	23.242	43.489		261.59	261.59	516.41	43.489	43.022	182.11	87.982	79.826	77.004	33.124
	288.93	180.43	87.982	27.587	49.699	64.013	83.372		96.661	28.924	322.71	24.866	93.995	26.973	42.217		249.17	249.17	474.69	42.217	44.872	179.98	87.52	70.985	91.204	40.008
	271.54	166.87	88.895	15.186	38.758	43.568	82.799		92.777	47.51	277.91	27.998	73.487	31.679	39.978		221	221	389.58	39.978	46.538	168.63	86.975	60.594	119.13	50.094
	245.22	152.89	83.925	12.542	35.09	26.409	76.73		94.383	70.378	230.4	30.762	48.991	37.373	37.845		185.99	185.99	285.51	37.845	47.477	155.48	90.07	50.463	150.88	62.798
	217.27	143.32	74.027	22.624	35.477	15.713	68.441		99.264	94.368	188.57	32.62	26.894	44.069	36.894		153.03	153.03	186.91	36.894	47.144	147.93	100.53	42.399	176.54	77.539
	195.02	138.67	63.354	41.582	36.701	13.915	61.205		105.2	116.32	160.86	33.033	13.584	51.778	38.198		131.02	131.02	118.21	38.198	44.853	153.39	122.07	38.212	186.19	93.736
	175.29	135.74	56.061	64.963	35.543	18.897	58.297		109.21	138.74	148.72	31.216	11.065	63.158	42.143		121.21	121.21	83.057	42.143	40.969	179.57	163.55	39.912	174.84	116.16
	110.99	115.43	47.092	180.38	26.547	183.26	109.27		267.78	52.487	302.12	57.068	116.54	25.96	73.316		181.07	181.07	69.011	73.316	51.506	83.607	157.65	141.81	183.46	40.904
	99.093	111.95	45.219	187.95	14.634	189.59	92.23		395.2	56.082	302.82	50.84	96.619	25.543	75.369		200.23	200.23	93.432	75.369	57.26	96.205	142.27	149.04	168.58	36.879
	87.154	112.07	45.622	195.56	7.5915	186.12	72.211		504.69	60.325	298.8	46.185	77.933	25.065	76.544		214.9	214.9	117.1	76.544	62.647	106.22	131.82	152.87	153.95	33.601
	78.961	119.31	47.794	203.57	3.7808	167.19	54.127		567.03	62.251	287.33	44.96	63.495	24.622	76.218		217.17	217.17	133.76	76.218	68.851	109.57	132.57	151.69	143.65	31.15
	74.419	133.35	51.231	208.63	1.5651	135.41	42.888		571.05	61.572	262.3	49	53.054	24.112	73.767		202.88	202.88	142.76	73.767	76.251	102.3	150.9	143.61	138.77	29.088
	71.005	148.88	55.426	207.41	1.4927	99.252	40.515		536.21	60.266	225.51	57.068	44.601	23.47	69.606		177.29	177.29	148.27	69.606	83.07	87.126	182.67	129.7	136.62	27.359
	68.861	160.63	62.137	196.54	4.6552	67.204	43.734		479.28	58.764	186.14	66.411	38.514	22.85	64.671		146.65	146.65	151.27	64.671	87.527	69.989	218.26	112.8	135.52	26.624
	68.128	163.3	71.702	170.15	10.23	47.753	49.513		417.06	57.494	153.38	74.275	35.17	22.407	59.9		117.21	117.21	152.73	59.9	87.845	56.812	248.04	95.758	133.79	27.542
	68.95	153.97	81.483	130.47	17.394	43.045	54.823		366.33	56.887	136.41	77.907	34.945	22.297	56.229		95.2	95.2	153.62	56.229	82.144	53.526	262.4	81.41	129.77	30.773
	71.57	136.17	88.843	86.321	25.325	47.421	56.631		321.91	57.214	137.66	76.584	40.346	22.766	53.799		79.904	79.904	151.8	53.799	71.611	64.515	256.72	67.864	121.2	38.339
	75.893	114.29	91.145	46.528	33.049	57.665	54.13		272.64	58.19	151	72.139	51.121	23.712	51.985		67.156	67.156	146.61	51.985	59.063	85.827	237.41	53.227	109.2	49.8
	81.554	92.689	85.938	19.912	41.115	70.561	49.341		226.24	59.405	172.79	65.661	63.511	24.764	50.577		58.046	58.046	141.29	50.577	47.318	110.88	211.41	40.338	97.143	62.123
	88.185	75.764	74.982	8.5903	50.983	82.891	43.475		190.44	60.452	199.4	58.236	73.757	25.55	49.363		53.663	53.663	139.07	49.363	39.192	133.11	185.63	32.035	88.393	72.274
	95.418	61.848	61.95	6.6815	64.114	97.362	37.743		172.99	60.923	227.16	50.954	78.1	25.702	48.133		55.098	55.098	143.17	48.133	35.309	145.91	167.02	31.156	86.318	77.221
	103.34	48.021	50.516	11.009	81.969	116.12	33.356		184.33	61.175	261.54	42.69	73.424	24.961	46.883		63.642	63.642	152.55	46.883	33.793	145.44	156.68	41.892	94.6	75.339
	112.2	36.777	44.352	18.396	111.42	135.1	29.287		219.31	61.479	304.97	32.718	62.234	23.574	45.752		78.569	78.569	165.03	45.752	33.705	136.07	150.01	62.352	110.99	68.651
	121.86	30.61	44.796	25.666	151.5	150.25	24.727		262.25	61.3	349.26	22.725	49.206	21.928	44.747		97.941	97.941	182.22	44.747	34.11	123.61	145.31	86.248	129.97	59.592
	132.2	32.015	49.398	35.451	191.9	157.51	21.219		297.45	60.103	386.24	14.397	39.013	20.409	43.875		119.82	119.82	205.72	43.875	34.072	113.85	140.93	107.29	146.03	50.6
	143.08	45.041	56.154	49.87	222.29	155.31	20.305		309.24	57.353	407.72	9.4194	36.332	19.404	43.143		142.27	142.27	237.13	43.143	33.574	112.6	135.17	119.2	153.63	44.111
	155.24	68.026	63.06	64.973	232.36	146.36	23.527		289.85	50.628	411.2	8.7545	45.24	18.576	42.662		169.78	169.78	289.08	42.662	33.241	123.71	126.53	120.24	148.81	39.432
	168.79	94.894	68.115	76.812	214.19	133.01	33.725		249.73	40.285	402.13	11.278	62.622	17.667	42.429		203.65	203.65	360.51	42.429	33.096	143.33	116.12	114.58	135.23	34.938
	182.59	119.57	71.55	81.438	174.65	117.59	49.872		200.54	29.956	384.28	15.547	82.358	17.183	42.274		237.14	237.14	432.46	42.274	33.165	165.66	106.22	104.85	118.87	31.669
	195.53	135.99	74.701	74.69	125.64	102.46	67.706		153.92	23.273	361.37	20.12	98.332	17.629	42.028		263.48	263.48	485.97	42.028	33.472	184.88	99.098	93.658	105.71	30.665
	206.47	142.26	77.219	59.202	79.027	85.393	82.966		121.54	23.868	337.16	23.552	104.42	19.512	41.523		275.94	275.94	502.07	41.523	34.202	195.22	97.036	83.62	101.72	32.965
	217.54	142.44	78.753	41.213	46.695	64.822	91.391		104.59	33.564	307.21	26.214	96.748	22.928	39.848		269.7	269.7	466.73	39.848	35.339	191.68	97.302	73.168	111.86	38.805
	229.5	139.34	78.952	26.964	30.744	44.081	90.412		95.304	49.942	269.03	29.068	79.382	27.539	37.117		249.26	249.26	392.6	37.117	36.605	178.15	98.378	60.56	132.17	47.492
	239.15	135.79	76.053	22.695	23.254	26.504	82.869		91.88	70.264	229.27	31.56	58.157	33.201	34.694		221.83	221.83	300.72	34.694	37.723	162.07	104.36	48.146	155.18	58.672
	243.3	134.62	70.288	31.456	21.075	15.422	72.617		92.516	91.792	194.57	33.133	38.904	39.77	33.941		194.65	194.65	212.13	33.941	38.415	150.91	119.35	38.276	173.42	71.99
	238.78	137.06	64.304	49.085	21.057	13.121	63.511		95.408	111.79	171.58	33.233	27.454	47.102	36.222		174.92	174.92	147.87	36.222	38.643	152.1	147.44	33.303	179.43	87.092
	219.59	141.24	60.748	71.011	20.05	17.378	59.404		98.133	132.71	161.99	30.914	25.6	57.531	42.864		162.36	162.36	108.98	42.864	38.592	172.43	200.36	35.627	169.5	108.49
	187.85	145.28	62.265	92.659	17.802	24.768	62.699		101.89	156.39	161.37	26.546	29.456	71.154	52.956		152.15	152.15	81.428	52.956	38.319	206.92	275.39	43.682	148.59	136.42
	152.56	147.35	71.373	109.46	16.414	31.862	70.828		110.32	179.13	167.18	21.548	36.33	84.468	64.511		144.73	144.73	63.663	64.511	37.881	245.41	354.92	53.865	122.28	164.11
	122.68	145.57	86.308	121.86	16.263	35.236	80.185		127.06	197.25	176.88	17.34	43.531	93.974	75.538		140.54	140.54	54.125	75.538	37.337	277.78	421.36	62.57	96.178	184.8
	107.19	137.48	103.29	132.91	17.725	33.91	87.167		155.74	207.06	187.92	15.34	48.369	96.172	84.049		140.03	140.03	51.256	84.049	36.507	293.85	457.09	66.193	75.852	191.72
	111.82	124.3	118.55	141.93	21.177	30.169	88.17		207.5	207.4	202.57	16.018	51.233	87.811	90.436		146.53	146.53	59.574	90.436	35.351	285.25	454.22	61.841	59.864	179.6
	89.159	171.91	77.634	111.36	154.8	118.57	103.09		91.405	86.679	318.91	61.504	146.75	23.43	55.679		165.18	165.18	74.291	55.679	26.929	106.64	175.36	104.64	161.64	65.369
	116.64	151.52	68.421	120.62	116.63	129.21	114.7		92.88	65.72	329.06	58.861	140.63	25.358	59.52		158.91	158.91	54.149	59.52	28.859	110.19	173.33	113.66	182.41	59.282
	132.28	142.8	61.027	129.86	81.35	141.26	122.55		114.19	52.139	335.08	55.978	132.98	26.501	62.821		160.33	160.33	45.715	62.821	34.74	110.53	170.96	120.72	192.88	53.865
	133.12	140.44	55.223	139.02	53.956	155.03	124		168.78	47.974	337.41	52.043	122.62	26.602	65.974		176.25	176.25	53.667	65.974	44.333	107.69	166.2	126.64	189.76	48.64
	124.64	141.28	50.78	148.03	35.206	167.15	115.91		250.96	50.177	336.88	46.998	109.28	25.993	69.343		205.49	205.49	73.61	69.343	55.286	104.67	158.02	132.22	177.47	42.713
	111.3	142.13	47.614	156.84	21.776	174.24	100.07		340.57	55.691	332.82	42.057	94.723	25.062	72.343		237.85	237.85	98.529	72.343	65.248	101.44	149.49	136.22	160.97	36.797
	97.553	139.82	45.876	168.8	12.523	172.91	81.147		417.44	61.455	324.53	38.435	80.711	24.193	74.39		263.17	263.17	121.41	74.39	71.87	97.965	143.7	137.42	145.17	31.609
	87.846	134.1	45.695	183.95	6.3051	158.37	63.827		461.43	64.413	311.33	37.349	69.011	23.773	74.896		271.25	271.25	135.24	74.896	74.751	94.194	143.74	134.59	135.03	27.864
	81.928	127.07	47.2	197.26	1.9799	132.88	52.788		464.37	64.223	288.17	40.096	58.802	23.969	73.364		256.91	256.91	136.87	73.364	75.459	88.365	153.22	126.06	132.27	25.168
	76.831	119.14	50.519	203.71	-0.21207	103.62	49.777		439.72	62.924	255.52	45.866	48.908	24.525	70.184		226.92	226.92	130.99	70.184	74.592	80.502	170.08	112.65	133.6	23.045
	72.936	110.68	57.825	198.27	0.49061	77.789	51.675		399.69	61.028	220.94	52.712	40.559	25.188	66.104		189.09	189.09	122.3	66.104	72.751	73.259	188.91	96.865	136.43	22.084
	70.619	102.09	69.032	174.73	3.7273	62.577	55.859		356.5	59.046	191.99	58.684	34.984	25.706	61.872		151.21	151.21	115.52	61.872	70.534	69.285	204.27	81.194	138.15	22.876
	70.26	93.063	80.881	136.43	9.1376	60.217	59.71		322.37	57.49	176.25	61.834	33.413	25.828	58.236		121.08	121.08	115.36	58.236	67.583	71.231	210.74	68.138	136.14	26.009
	71.563	83.349	90.113	92.709	16.361	65.915	60.605		293.39	56.117	175.94	61.871	38.528	25.434	55.02		96.396	96.396	123.64	55.02	63.499	82.517	204.94	55.84	127.61	33.465
	74.275	73.391	93.47	52.865	24.525	76.321	57.9		261.4	54.587	186.01	60.094	49.508	24.69	51.725		71.965	71.965	137.23	51.725	58.818	101.38	190.48	42.634	114.28	44.849
	78.84	63.636	88.232	26.215	33.869	88.084	53.343		232.28	53.263	203.13	56.94	62.331	23.778	48.616		51.233	51.233	153.38	48.616	54.081	122.68	172.44	31.307	100.38	57.192
	85.704	54.53	76.571	14.383	45.704	97.854	47.9		211.93	52.509	223.97	52.846	72.978	22.879	45.955		37.65	37.65	169.35	45.955	49.825	141.29	155.9	24.646	90.112	67.524
	95.311	44.404	62.567	11.161	61.336	107.07	42.538		206.22	52.69	245.23	48.249	77.425	22.176	44.005		34.663	34.663	182.42	44.005	45.944	152.09	145.92	25.437	87.699	72.875
	110.87	32.96	50.3	14.112	82.074	117.98	38.224		225.1	54.799	271.4	42.127	72.535	21.766	43.035		45.227	45.227	189.11	43.035	42.077	151.58	144.93	38.1	96.893	71.802
	132.09	22.703	43.852	20.8	115.73	128.4	33.809		264.62	58.59	304.72	34.189	60.989	21.53	42.867		67.04	67.04	191.26	42.867	38.387	143.17	149.56	60.777	114.88	66.285
	154.15	16.134	44.875	28.79	161.42	136.18	28.649		309.91	62.578	338.4	25.968	47.494	21.318	43.102		95.675	95.675	194.05	43.102	35.034	132.11	156.15	86.839	136.04	58.488
	172.24	15.758	50.647	41.512	207.44	139.14	24.466		346.05	65.275	365.66	18.996	36.759	20.98	43.339		126.7	126.7	202.68	43.339	32.18	123.66	161.09	109.66	154.73	50.579
	181.53	23.982	58.691	60.59	242.08	136.44	22.982		358.16	65.191	379.72	14.804	33.493	20.369	43.18		155.7	155.7	222.35	43.18	29.816	123.07	160.73	122.61	165.33	44.722
	176.62	39.137	66.529	80.879	253.64	129.53	25.921		338.27	60.041	377.61	14.139	41.185	18.811	42.596		186.31	186.31	263.74	42.596	27.837	134.09	151.51	123.75	165.17	40.249
	160.71	57.612	71.683	97.233	233.05	119.67	36.244		296.29	50.817	363.87	15.978	56.696	16.408	41.854		221.48	221.48	323.39	41.854	26.252	153.23	135.85	117.52	157.99	35.715
	141.93	75.796	73.872	104.51	188.14	108.14	52.802		244.2	40.948	342.92	19.204	74.792	14.165	40.995		255.74	255.74	385.27	40.995	25.073	174.84	119.1	106.8	147.81	32.125
	128.4	90.078	74.75	98.313	132.47	96.204	71.153		193.95	33.864	319.22	22.701	90.238	13.09	40.061		283.64	283.64	433.34	40.061	24.311	193.29	106.62	94.481	138.65	30.483
	128.24	99.92	74.736	82.079	79.604	82.018	86.854		157.52	32.995	297.2	25.35	97.8	14.189	39.093		299.69	299.69	451.56	39.093	23.821	202.93	103.77	83.46	134.51	31.792
	149.83	107.73	74.246	62.391	43.108	64.732	95.462		135.23	39.628	274.11	27.554	94.726	18.054	36.868		300.94	300.94	430.64	36.868	23.593	199.61	108.23	71.969	137.87	36.231
	187.77	114.31	73.7	45.832	25.136	47.121	94.331		119.13	51.475	246.99	30.057	84.507	24.012	33.358		291.02	291.02	381.27	33.358	23.849	187.1	116.45	58.079	146.05	43.13
	229.47	120.48	72.055	38.986	16.642	31.957	86.422		108.69	66.607	219.98	32.258	71.269	31.179	30.398		274.4	274.4	317.39	30.398	24.807	171.61	131.88	44.441	155.35	52.223
	262.36	127.03	69.034	44.659	14.4	22.011	75.705		103.38	83.095	197.2	33.554	59.137	38.669	29.824		255.53	255.53	252.95	29.824	26.686	159.35	157.98	33.705	162.05	63.242
	273.86	135.82	66.197	58.461	15.179	18.899	66.15		102.71	99.008	182.81	33.344	52.238	45.597	33.472		238.86	238.86	201.9	33.472	30.426	156.54	198.2	28.52	162.43	75.92
	255.58	146.32	65.109	76.185	15.75	20.77	61.726		106.01	116.66	178.89	30.467	51.775	53.329	43.8		221.95	221.95	161.39	43.8	35.879	168.18	268.14	31.56	154.49	93.765
	215.9	155.74	67.331	93.622	16.648	25.205	64.983		113.65	137.35	182.68	25.325	54.996	62.454	59.585		201.81	201.81	122.13	59.585	41.639	190.14	365.48	41.059	140.7	116.95
	167.42	161.3	74.427	106.57	20.027	29.786	73.275		126.57	157.58	191.05	19.658	60.099	70.926	77.139		182.14	182.14	88.375	77.139	46.296	214.89	466.86	53.005	124.07	140.23
	122.7	160.23	85.356	114.72	25.084	32.09	82.777		145.75	173.9	200.84	15.209	65.279	76.695	92.769		166.63	166.63	64.405	92.769	48.443	234.94	548.88	63.39	107.62	158.32
	94.338	148.03	97.772	120.88	31.015	31.722	89.666		172.16	182.82	208.93	13.719	68.734	77.715	102.79		158.95	158.95	54.483	102.79	46.848	242.76	588.18	68.204	94.339	165.97
	85.896	126.55	109.33	125.51	37.016	30.294	90.119		214.94	183.22	213.29	16.124	70.985	71.868	106.23		162.79	162.79	65.249	106.23	42.449	231.03	571.75	64.434	83.457	159.77
	51.298	90.309	61.227	33.118	131.65	164.59	25.094		213.04	56.335	362.64	10.902	53.919	21.838	42.021		162.98	162.98	177.31	42.021	37.477	98.936	106.92	92.958	137.86	45.345
	66.678	179.93	60.987	206.39	12.53	93.804	32.064		585.27	61.527	202.07	61.692	43.266	22.984	68.117		143.87	143.87	165.1	68.117	92.056	91.263	188.17	139.59	142.49	31.748
	66.439	213.59	66.917	193.6	19.868	65.744	36.947		522.24	60.232	161.82	71.963	40.156	21.694	63.895		118.9	118.9	176.27	63.895	101.79	69.968	233.03	121.88	137.47	31.06
	67.398	228.92	75.471	168.01	29.234	48.735	44.443		452.14	59.245	128.46	80.555	39.519	20.775	59.885		95.823	95.823	183.35	59.885	104.38	52.616	270.81	103.95	132.17	31.827
	69.53	220.33	84.27	131.02	39.08	44.438	51.205		393.23	58.898	111.69	84.387	40.719	20.593	56.86		79.631	79.631	184.61	56.86	96.8	46.58	289.66	88.9	125.94	34.734
	73.722	195.3	90.933	90.308	47.857	48	53.889		339.18	59.639	113.94	82.615	45.854	21.613	55.059		70.321	70.321	175.13	55.059	81.489	56.395	284.44	75.001	116.96	41.673
	79.991	162.21	93.083	53.538	54.467	56.935	51.39		277.83	61.246	128.73	77.292	55.348	23.59	53.97		64.563	64.563	156.06	53.97	62.98	77.145	263.04	60.164	105.65	52.185
	87.005	129.42	88.64	28.382	59.941	68.754	45.94		218.67	63.048	152.43	69.685	66.053	25.827	53.229		62.365	62.365	134.78	53.229	45.809	102.03	233.18	47.008	94.764	63.437
	93.437	105.3	79.192	16.756	65.929	80.969	39.193		171.17	64.372	181.4	61.06	74.824	27.628	52.475		63.731	63.731	118.68	52.475	34.511	124.25	202.58	38.152	87.024	72.591
	97.956	88.308	67.855	13.549	74.079	96.74	32.802		144.81	64.546	212.01	52.682	78.514	28.296	51.347		68.668	68.668	115.17	51.347	30.156	136.99	178.95	36.214	85.165	76.813
	97.166	72.861	57.745	15.882	86.043	117.72	28.421		150.03	63.658	250.03	43.314	74.344	27.357	49.632		78.016	78.016	124.77	49.632	29.722	136.51	162.39	45.018	92.886	74.497
	91.954	61.282	51.979	20.88	106.88	139.18	25.445		180.49	62.154	297.89	32.112	64.411	25.275	47.573		91.773	91.773	142.56	47.573	31.601	127.35	147.75	62.818	108.36	67.533
	87.414	55.897	51.369	25.665	135.48	156.38	22.771		220.57	59.906	346.92	20.933	52.886	22.761	45.485		108.68	108.68	167.73	45.485	34.188	115.13	134.89	83.88	126.05	58.33
	88.639	59.029	53.838	32.407	164.27	164.57	21.307		254.62	56.782	388.46	11.633	43.937	20.529	43.686		127.46	127.46	199.48	43.686	35.875	105.47	123.65	102.47	140.41	49.294
	100.72	76.211	58.167	43.024	185.66	161.8	21.961		267.01	52.652	413.86	6.0685	41.734	19.29	42.492		146.86	146.86	236.99	42.492	36.733	104.01	113.87	112.84	145.88	42.835
	131.2	105.89	63.136	54.261	192.05	151.22	25.64		250.75	45.014	421.17	5.3143	50.313	18.858	42.161		171.4	171.4	293.63	42.161	37.832	114.23	105.22	113.4	137.55	38.215
	176.68	139.78	67.524	62.865	177.42	135.78	34.639		216.26	33.954	416.16	8.1327	66.892	18.758	42.483		201.9	201.9	369.93	42.483	39.068	132.38	97.814	107.94	119.11	33.828
	225.85	169.56	72.289	65.581	146.84	118.41	48.351		174.03	23.227	401.76	12.912	85.421	19.269	43.07		231.61	231.61	445.86	43.07	40.336	153.23	92.138	98.915	97.954	30.78
	267.41	186.96	78.243	58.56	109.33	102.05	63.337		134.53	16.585	380.86	18.04	99.849	20.67	43.534		253.76	253.76	501.37	43.534	41.534	171.55	88.694	88.734	81.457	30.177
	290.07	188.73	83.953	43.97	73.938	84.565	76.157		108.25	17.782	356.38	21.905	104.13	23.242	43.489		261.59	261.59	516.41	43.489	43.022	182.11	87.982	79.826	77.004	33.124
	288.93	180.43	87.982	27.587	49.699	64.013	83.372		96.661	28.924	322.71	24.866	93.995	26.973	42.217		249.17	249.17	474.69	42.217	44.872	179.98	87.52	70.985	91.204	40.008
	271.54	166.87	88.895	15.186	38.758	43.568	82.799		92.777	47.51	277.91	27.998	73.487	31.679	39.978		221	221	389.58	39.978	46.538	168.63	86.975	60.594	119.13	50.094
	245.22	152.89	83.925	12.542	35.09	26.409	76.73		94.383	70.378	230.4	30.762	48.991	37.373	37.845		185.99	185.99	285.51	37.845	47.477	155.48	90.07	50.463	150.88	62.798
	217.27	143.32	74.027	22.624	35.477	15.713	68.441		99.264	94.368	188.57	32.62	26.894	44.069	36.894		153.03	153.03	186.91	36.894	47.144	147.93	100.53	42.399	176.54	77.539
	195.02	138.67	63.354	41.582	36.701	13.915	61.205		105.2	116.32	160.86	33.033	13.584	51.778	38.198		131.02	131.02	118.21	38.198	44.853	153.39	122.07	38.212	186.19	93.736
	175.29	135.74	56.061	64.963	35.543	18.897	58.297		109.21	138.74	148.72	31.216	11.065	63.158	42.143		121.21	121.21	83.057	42.143	40.969	179.57	163.55	39.912	174.84	116.16
	110.99	115.43	47.092	180.38	26.547	183.26	109.27		267.78	52.487	302.12	57.068	116.54	25.96	73.316		181.07	181.07	69.011	73.316	51.506	83.607	157.65	141.81	183.46	40.904
	99.093	111.95	45.219	187.95	14.634	189.59	92.23		395.2	56.082	302.82	50.84	96.619	25.543	75.369		200.23	200.23	93.432	75.369	57.26	96.205	142.27	149.04	168.58	36.879
	87.154	112.07	45.622	195.56	7.5915	186.12	72.211		504.69	60.325	298.8	46.185	77.933	25.065	76.544		214.9	214.9	117.1	76.544	62.647	106.22	131.82	152.87	153.95	33.601
	78.961	119.31	47.794	203.57	3.7808	167.19	54.127		567.03	62.251	287.33	44.96	63.495	24.622	76.218		217.17	217.17	133.76	76.218	68.851	109.57	132.57	151.69	143.65	31.15
	74.419	133.35	51.231	208.63	1.5651	135.41	42.888		571.05	61.572	262.3	49	53.054	24.112	73.767		202.88	202.88	142.76	73.767	76.251	102.3	150.9	143.61	138.77	29.088
	71.005	148.88	55.426	207.41	1.4927	99.252	40.515		536.21	60.266	225.51	57.068	44.601	23.47	69.606		177.29	177.29	148.27	69.606	83.07	87.126	182.67	129.7	136.62	27.359
	68.861	160.63	62.137	196.54	4.6552	67.204	43.734		479.28	58.764	186.14	66.411	38.514	22.85	64.671		146.65	146.65	151.27	64.671	87.527	69.989	218.26	112.8	135.52	26.624
	68.128	163.3	71.702	170.15	10.23	47.753	49.513		417.06	57.494	153.38	74.275	35.17	22.407	59.9		117.21	117.21	152.73	59.9	87.845	56.812	248.04	95.758	133.79	27.542
	68.95	153.97	81.483	130.47	17.394	43.045	54.823		366.33	56.887	136.41	77.907	34.945	22.297	56.229		95.2	95.2	153.62	56.229	82.144	53.526	262.4	81.41	129.77	30.773
	71.57	136.17	88.843	86.321	25.325	47.421	56.631		321.91	57.214	137.66	76.584	40.346	22.766	53.799		79.904	79.904	151.8	53.799	71.611	64.515	256.72	67.864	121.2	38.339
	75.893	114.29	91.145	46.528	33.049	57.665	54.13		272.64	58.19	151	72.139	51.121	23.712	51.985		67.156	67.156	146.61	51.985	59.063	85.827	237.41	53.227	109.2	49.8
	81.554	92.689	85.938	19.912	41.115	70.561	49.341		226.24	59.405	172.79	65.661	63.511	24.764	50.577		58.046	58.046	141.29	50.577	47.318	110.88	211.41	40.338	97.143	62.123
	88.185	75.764	74.982	8.5903	50.983	82.891	43.475		190.44	60.452	199.4	58.236	73.757	25.55	49.363		53.663	53.663	139.07	49.363	39.192	133.11	185.63	32.035	88.393	72.274
	95.418	61.848	61.95	6.6815	64.114	97.362	37.743		172.99	60.923	227.16	50.954	78.1	25.702	48.133		55.098	55.098	143.17	48.133	35.309	145.91	167.02	31.156	86.318	77.221
	103.34	48.021	50.516	11.009	81.969	116.12	33.356		184.33	61.175	261.54	42.69	73.424	24.961	46.883		63.642	63.642	152.55	46.883	33.793	145.44	156.68	41.892	94.6	75.339
	112.2	36.777	44.352	18.396	111.42	135.1	29.287		219.31	61.479	304.97	32.718	62.234	23.574	45.752		78.569	78.569	165.03	45.752	33.705	136.07	150.01	62.352	110.99	68.651
	121.86	30.61	44.796	25.666	151.5	150.25	24.727		262.25	61.3	349.26	22.725	49.206	21.928	44.747		97.941	97.941	182.22	44.747	34.11	123.61	145.31	86.248	129.97	59.592
	132.2	32.015	49.398	35.451	191.9	157.51	21.219		297.45	60.103	386.24	14.397	39.013	20.409	43.875		119.82	119.82	205.72	43.875	34.072	113.85	140.93	107.29	146.03	50.6
	143.08	45.041	56.154	49.87	222.29	155.31	20.305		309.24	57.353	407.72	9.4194	36.332	19.404	43.143		142.27	142.27	237.13	43.143	33.574	112.6	135.17	119.2	153.63	44.111
	155.24	68.026	63.06	64.973	232.36	146.36	23.527		289.85	50.628	411.2	8.7545	45.24	18.576	42.662		169.78	169.78	289.08	42.662	33.241	123.71	126.53	120.24	148.81	39.432
	168.79	94.894	68.115	76.812	214.19	133.01	33.725		249.73	40.285	402.13	11.278	62.622	17.667	42.429		203.65	203.65	360.51	42.429	33.096	143.33	116.12	114.58	135.23	34.938
	182.59	119.57	71.55	81.438	174.65	117.59	49.872		200.54	29.956	384.28	15.547	82.358	17.183	42.274		237.14	237.14	432.46	42.274	33.165	165.66	106.22	104.85	118.87	31.669
	195.53	135.99	74.701	74.69	125.64	102.46	67.706		153.92	23.273	361.37	20.12	98.332	17.629	42.028		263.48	263.48	485.97	42.028	33.472	184.88	99.098	93.658	105.71	30.665
	206.47	142.26	77.219	59.202	79.027	85.393	82.966		121.54	23.868	337.16	23.552	104.42	19.512	41.523		275.94	275.94	502.07	41.523	34.202	195.22	97.036	83.62	101.72	32.965
	217.54	142.44	78.753	41.213	46.695	64.822	91.391		104.59	33.564	307.21	26.214	96.748	22.928	39.848		269.7	269.7	466.73	39.848	35.339	191.68	97.302	73.168	111.86	38.805
	229.5	139.34	78.952	26.964	30.744	44.081	90.412		95.304	49.942	269.03	29.068	79.382	27.539	37.117		249.26	249.26	392.6	37.117	36.605	178.15	98.378	60.56	132.17	47.492
	239.15	135.79	76.053	22.695	23.254	26.504	82.869		91.88	70.264	229.27	31.56	58.157	33.201	34.694		221.83	221.83	300.72	34.694	37.723	162.07	104.36	48.146	155.18	58.672
	243.3	134.62	70.288	31.456	21.075	15.422	72.617		92.516	91.792	194.57	33.133	38.904	39.77	33.941		194.65	194.65	212.13	33.941	38.415	150.91	119.35	38.276	173.42	71.99
	238.78	137.06	64.304	49.085	21.057	13.121	63.511		95.408	111.79	171.58	33.233	27.454	47.102	36.222		174.92	174.92	147.87	36.222	38.643	152.1	147.44	33.303	179.43	87.092
	219.59	141.24	60.748	71.011	20.05	17.378	59.404		98.133	132.71	161.99	30.914	25.6	57.531	42.864		162.36	162.36	108.98	42.864	38.592	172.43	200.36	35.627	169.5	108.49
	187.85	145.28	62.265	92.659	17.802	24.768	62.699		101.89	156.39	161.37	26.546	29.456	71.154	52.956		152.15	152.15	81.428	52.956	38.319	206.92	275.39	43.682	148.59	136.42
	152.56	147.35	71.373	109.46	16.414	31.862	70.828		110.32	179.13	167.18	21.548	36.33	84.468	64.511		144.73	144.73	63.663	64.511	37.881	245.41	354.92	53.865	122.28	164.11
	122.68	145.57	86.308	121.86	16.263	35.236	80.185		127.06	197.25	176.88	17.34	43.531	93.974	75.538		140.54	140.54	54.125	75.538	37.337	277.78	421.36	62.57	96.178	184.8
	107.19	137.48	103.29	132.91	17.725	33.91	87.167		155.74	207.06	187.92	15.34	48.369	96.172	84.049		140.03	140.03	51.256	84.049	36.507	293.85	457.09	66.193	75.852	191.72
	111.82	124.3	118.55	141.93	21.177	30.169	88.17		207.5	207.4	202.57	16.018	51.233	87.811	90.436		146.53	146.53	59.574	90.436	35.351	285.25	454.22	61.841	59.864	179.6
	89.159	171.91	77.634	111.36	154.8	118.57	103.09		91.405	86.679	318.91	61.504	146.75	23.43	55.679		165.18	165.18	74.291	55.679	26.929	106.64	175.36	104.64	161.64	65.369
	116.64	151.52	68.421	120.62	116.63	129.21	114.7		92.88	65.72	329.06	58.861	140.63	25.358	59.52		158.91	158.91	54.149	59.52	28.859	110.19	173.33	113.66	182.41	59.282
	132.28	142.8	61.027	129.86	81.35	141.26	122.55		114.19	52.139	335.08	55.978	132.98	26.501	62.821		160.33	160.33	45.715	62.821	34.74	110.53	170.96	120.72	192.88	53.865
	133.12	140.44	55.223	139.02	53.956	155.03	124		168.78	47.974	337.41	52.043	122.62	26.602	65.974		176.25	176.25	53.667	65.974	44.333	107.69	166.2	126.64	189.76	48.64
	124.64	141.28	50.78	148.03	35.206	167.15	115.91		250.96	50.177	336.88	46.998	109.28	25.993	69.343		205.49	205.49	73.61	69.343	55.286	104.67	158.02	132.22	177.47	42.713
	111.3	142.13	47.614	156.84	21.776	174.24	100.07		340.57	55.691	332.82	42.057	94.723	25.062	72.343		237.85	237.85	98.529	72.343	65.248	101.44	149.49	136.22	160.97	36.797
	97.553	139.82	45.876	168.8	12.523	172.91	81.147		417.44	61.455	324.53	38.435	80.711	24.193	74.39		263.17	263.17	121.41	74.39	71.87	97.965	143.7	137.42	145.17	31.609
	87.846	134.1	45.695	183.95	6.3051	158.37	63.827		461.43	64.413	311.33	37.349	69.011	23.773	74.896		271.25	271.25	135.24	74.896	74.751	94.194	143.74	134.59	135.03	27.864
	81.928	127.07	47.2	197.26	1.9799	132.88	52.788		464.37	64.223	288.17	40.096	58.802	23.969	73.364		256.91	256.91	136.87	73.364	75.459	88.365	153.22	126.06	132.27	25.168
	76.831	119.14	50.519	203.71	-0.21207	103.62	49.777		439.72	62.924	255.52	45.866	48.908	24.525	70.184		226.92	226.92	130.99	70.184	74.592	80.502	170.08	112.65	133.6	23.045
	72.936	110.68	57.825	198.27	0.49061	77.789	51.675		399.69	61.028	220.94	52.712	40.559	25.188	66.104		189.09	189.09	122.3	66.104	72.751	73.259	188.91	96.865	136.43	22.084
	70.619	102.09	69.032	174.73	3.7273	62.577	55.859		356.5	59.046	191.99	58.684	34.984	25.706	61.872		151.21	151.21	115.52	61.872	70.534	69.285	204.27	81.194	138.15	22.876
	70.26	93.063	80.881	136.43	9.1376	60.217	59.71		322.37	57.49	176.25	61.834	33.413	25.828	58.236		121.08	121.08	115.36	58.236	67.583	71.231	210.74	68.138	136.14	26.009
	71.563	83.349	90.113	92.709	16.361	65.915	60.605		293.39	56.117	175.94	61.871	38.528	25.434	55.02		96.396	96.396	123.64	55.02	63.499	82.517	204.94	55.84	127.61	33.465
	74.275	73.391	93.47	52.865	24.525	76.321	57.9		261.4	54.587	186.01	60.094	49.508	24.69	51.725		71.965	71.965	137.23	51.725	58.818	101.38	190.48	42.634	114.28	44.849
	78.84	63.636	88.232	26.215	33.869	88.084	53.343		232.28	53.263	203.13	56.94	62.331	23.778	48.616		51.233	51.233	153.38	48.616	54.081	122.68	172.44	31.307	100.38	57.192
	85.704	54.53	76.571	14.383	45.704	97.854	47.9		211.93	52.509	223.97	52.846	72.978	22.879	45.955		37.65	37.65	169.35	45.955	49.825	141.29	155.9	24.646	90.112	67.524
	95.311	44.404	62.567	11.161	61.336	107.07	42.538		206.22	52.69	245.23	48.249	77.425	22.176	44.005		34.663	34.663	182.42	44.005	45.944	152.09	145.92	25.437	87.699	72.875
	110.87	32.96	50.3	14.112	82.074	117.98	38.224		225.1	54.799	271.4	42.127	72.535	21.766	43.035		45.227	45.227	189.11	43.035	42.077	151.58	144.93	38.1	96.893	71.802
	132.09	22.703	43.852	20.8	115.73	128.4	33.809		264.62	58.59	304.72	34.189	60.989	21.53	42.867		67.04	67.04	191.26	42.867	38.387	143.17	149.56	60.777	114.88	66.285
	154.15	16.134	44.875	28.79	161.42	136.18	28.649		309.91	62.578	338.4	25.968	47.494	21.318	43.102		95.675	95.675	194.05	43.102	35.034	132.11	156.15	86.839	136.04	58.488
	172.24	15.758	50.647	41.512	207.44	139.14	24.466		346.05	65.275	365.66	18.996	36.759	20.98	43.339		126.7	126.7	202.68	43.339	32.18	123.66	161.09	109.66	154.73	50.579
	181.53	23.982	58.691	60.59	242.08	136.44	22.982		358.16	65.191	379.72	14.804	33.493	20.369	43.18		155.7	155.7	222.35	43.18	29.816	123.07	160.73	122.61	165.33	44.722
	176.62	39.137	66.529	80.879	253.64	129.53	25.921		338.27	60.041	377.61	14.139	41.185	18.811	42.596		186.31	186.31	263.74	42.596	27.837	134.09	151.51	123.75	165.17	40.249
	160.71	57.612	71.683	97.233	233.05	119.67	36.244		296.29	50.817	363.87	15.978	56.696	16.408	41.854		221.48	221.48	323.39	41.854	26.252	153.23	135.85	117.52	157.99	35.715
	141.93	75.796	73.872	104.51	188.14	108.14	52.802		244.2	40.948	342.92	19.204	74.792	14.165	40.995		255.74	255.74	385.27	40.995	25.073	174.84	119.1	106.8	147.81	32.125
	128.4	90.078	74.75	98.313	132.47	96.204	71.153		193.95	33.864	319.22	22.701	90.238	13.09	40.061		283.64	283.64	433.34	40.061	24.311	193.29	106.62	94.481	138.65	30.483
	128.24	99.92	74.736	82.079	79.604	82.018	86.854		157.52	32.995	297.2	25.35	97.8	14.189	39.093		299.69	299.69	451.56	39.093	23.821	202.93	103.77	83.46	134.51	31.792
	149.83	107.73	74.246	62.391	43.108	64.732	95.462		135.23	39.628	274.11	27.554	94.726	18.054	36.868		300.94	300.94	430.64	36.868	23.593	199.61	108.23	71.969	137.87	36.231
	187.77	114.31	73.7	45.832	25.136	47.121	94.331		119.13	51.475	246.99	30.057	84.507	24.012	33.358		291.02	291.02	381.27	33.358	23.849	187.1	116.45	58.079	146.05	43.13
	229.47	120.48	72.055	38.986	16.642	31.957	86.422		108.69	66.607	219.98	32.258	71.269	31.179	30.398		274.4	274.4	317.39	30.398	24.807	171.61	131.88	44.441	155.35	52.223
	262.36	127.03	69.034	44.659	14.4	22.011	75.705		103.38	83.095	197.2	33.554	59.137	38.669	29.824		255.53	255.53	252.95	29.824	26.686	159.35	157.98	33.705	162.05	63.242
	273.86	135.82	66.197	58.461	15.179	18.899	66.15		102.71	99.008	182.81	33.344	52.238	45.597	33.472		238.86	238.86	201.9	33.472	30.426	156.54	198.2	28.52	162.43	75.92
	255.58	146.32	65.109	76.185	15.75	20.77	61.726		106.01	116.66	178.89	30.467	51.775	53.329	43.8		221.95	221.95	161.39	43.8	35.879	168.18	268.14	31.56	154.49	93.765
	215.9	155.74	67.331	93.622	16.648	25.205	64.983		113.65	137.35	182.68	25.325	54.996	62.454	59.585		201.81	201.81	122.13	59.585	41.639	190.14	365.48	41.059	140.7	116.95
	167.42	161.3	74.427	106.57	20.027	29.786	73.275		126.57	157.58	191.05	19.658	60.099	70.926	77.139		182.14	182.14	88.375	77.139	46.296	214.89	466.86	53.005	124.07	140.23
	122.7	160.23	85.356	114.72	25.084	32.09	82.777		145.75	173.9	200.84	15.209	65.279	76.695	92.769		166.63	166.63	64.405	92.769	48.443	234.94	548.88	63.39	107.62	158.32
	94.338	148.03	97.772	120.88	31.015	31.722	89.666		172.16	182.82	208.93	13.719	68.734	77.715	102.79		158.95	158.95	54.483	102.79	46.848	242.76	588.18	68.204	94.339	165.97
	85.896	126.55	109.33	125.51	37.016	30.294	90.119		214.94	183.22	213.29	16.124	70.985	71.868	106.23		162.79	162.79	65.249	106.23	42.449	231.03	571.75	64.434	83.457	159.77
	51.298	90.309	61.227	33.118	131.65	164.59	25.094		213.04	56.335	362.64	10.902	53.919	21.838	42.021		162.98	162.98	177.31	42.021	37.477	98.936	106.92	92.958	137.86	45.345
	66.678	179.93	60.987	206.39	12.53	93.804	32.064		585.27	61.527	202.07	61.692	43.266	22.984	68.117		143.87	143.87	165.1	68.117	92.056	91.263	188.17	139.59	142.49	31.748
	66.439	213.59	66.917	193.6	19.868	65.744	36.947		522.24	60.232	161.82	71.963	40.156	21.694	63.895		118.9	118.9	176.27	63.895	101.79	69.968	233.03	121.88	137.47	31.06
	67.398	228.92	75.471	168.01	29.234	48.735	44.443		452.14	59.245	128.46	80.555	39.519	20.775	59.885		95.823	95.823	183.35	59.885	104.38	52.616	270.81	103.95	132.17	31.827
	69.53	220.33	84.27	131.02	39.08	44.438	51.205		393.23	58.898	111.69	84.387	40.719	20.593	56.86		79.631	79.631	184.61	56.86	96.8	46.58	289.66	88.9	125.94	34.734
	73.722	195.3	90.933	90.308	47.857	48	53.889		339.18	59.639	113.94	82.615	45.854	21.613	55.059		70.321	70.321	175.13	55.059	81.489	56.395	284.44	75.001	116.96	41.673
	79.991	162.21	93.083	53.538	54.467	56.935	51.39		277.83	61.246	128.73	77.292	55.348	23.59	53.97		64.563	64.563	156.06	53.97	62.98	77.145	263.04	60.164	105.65	52.185
	87.005	129.42	88.64	28.382	59.941	68.754	45.94		218.67	63.048	152.43	69.685	66.053	25.827	53.229		62.365	62.365	134.78	53.229	45.809	102.03	233.18	47.008	94.764	63.437
	93.437	105.3	79.192	16.756	65.929	80.969	39.193		171.17	64.372	181.4	61.06	74.824	27.628	52.475		63.731	63.731	118.68	52.475	34.511	124.25	202.58	38.152	87.024	72.591
	97.956	88.308	67.855	13.549	74.079	96.74	32.802		144.81	64.546	212.01	52.682	78.514	28.296	51.347		68.668	68.668	115.17	51.347	30.156	136.99	178.95	36.214	85.165	76.813
	97.166	72.861	57.745	15.882	86.043	117.72	28.421		150.03	63.658	250.03	43.314	74.344	27.357	49.632		78.016	78.016	124.77	49.632	29.722	136.51	162.39	45.018	92.886	74.497
	91.954	61.282	51.979	20.88	106.88	139.18	25.445		180.49	62.154	297.89	32.112	64.411	25.275	47.573		91.773	91.773	142.56	47.573	31.601	127.35	147.75	62.818	108.36	67.533
	87.414	55.897	51.369	25.665	135.48	156.38	22.771		220.57	59.906	346.92	20.933	52.886	22.761	45.485		108.68	108.68	167.73	45.485	34.188	115.13	134.89	83.88	126.05	58.33
	88.639	59.029	53.838	32.407	164.27	164.57	21.307		254.62	56.782	388.46	11.633	43.937	20.529	43.686		127.46	127.46	199.48	43.686	35.875	105.47	123.65	102.47	140.41	49.294
	100.72	76.211	58.167	43.024	185.66	161.8	21.961		267.01	52.652	413.86	6.0685	41.734	19.29	42.492		146.86	146.86	236.99	42.492	36.733	104.01	113.87	112.84	145.88	42.835
	131.2	105.89	63.136	54.261	192.05	151.22	25.64		250.75	45.014	421.17	5.3143	50.313	18.858	42.161		171.4	171.4	293.63	42.161	37.832	114.23	105.22	113.4	137.55	38.215
	176.68	139.78	67.524	62.865	177.42	135.78	34.639		216.26	33.954	416.16	8.1327	66.892	18.758	42.483		201.9	201.9	369.93	42.483	39.068	132.38	97.814	107.94	119.11	33.828
	225.85	169.56	72.289	65.581	146.84	118.41	48.351		174.03	23.227	401.76	12.912	85.421	19.269	43.07		231.61	231.61	445.86	43.07	40.336	153.23	92.138	98.915	97.954	30.78
	267.41	186.96	78.243	58.56	109.33	102.05	63.337		134.53	16.585	380.86	18.04	99.849	20.67	43.534		253.76	253.76	501.37	43.534	41.534	171.55	88.694	88.734	81.457	30.177
	290.07	188.73	83.953	43.97	73.938	84.565	76.157		108.25	17.782	356.38	21.905	104.13	23.242	43.489		261.59	261.59	516.41	43.489	43.022	182.11	87.982	79.826	77.004	33.124
	288.93	180.43	87.982	27.587	49.699	64.013	83.372		96.661	28.924	322.71	24.866	93.995	26.973	42.217		249.17	249.17	474.69	42.217	44.872	179.98	87.52	70.985	91.204	40.008
	271.54	166.87	88.895	15.186	38.758	43.568	82.799		92.777	47.51	277.91	27.998	73.487	31.679	39.978		221	221	389.58	39.978	46.538	168.63	86.975	60.594	119.13	50.094
	245.22	152.89	83.925	12.542	35.09	26.409	76.73		94.383	70.378	230.4	30.762	48.991	37.373	37.845		185.99	185.99	285.51	37.845	47.477	155.48	90.07	50.463	150.88	62.798
	217.27	143.32	74.027	22.624	35.477	15.713	68.441		99.264	94.368	188.57	32.62	26.894	44.069	36.894		153.03	153.03	186.91	36.894	47.144	147.93	100.53	42.399	176.54	77.539
	195.02	138.67	63.354	41.582	36.701	13.915	61.205		105.2	116.32	160.86	33.033	13.584	51.778	38.198		131.02	131.02	118.21	38.198	44.853	153.39	122.07	38.212	186.19	93.736
	175.29	135.74	56.061	64.963	35.543	18.897	58.297		109.21	138.74	148.72	31.216	11.065	63.158	42.143		121.21	121.21	83.057	42.143	40.969	179.57	163.55	39.912	174.84	116.16
	110.99	115.43	47.092	180.38	26.547	183.26	109.27		267.78	52.487	302.12	57.068	116.54	25.96	73.316		181.07	181.07	69.011	73.316	51.506	83.607	157.65	141.81	183.46	40.904
	99.093	111.95	45.219	187.95	14.634	189.59	92.23		395.2	56.082	302.82	50.84	96.619	25.543	75.369		200.23	200.23	93.432	75.369	57.26	96.205	142.27	149.04	168.58	36.879
	87.154	112.07	45.622	195.56	7.5915	186.12	72.211		504.69	60.325	298.8	46.185	77.933	25.065	76.544		214.9	214.9	117.1	76.544	62.647	106.22	131.82	152.87	153.95	33.601
	78.961	119.31	47.794	203.57	3.7808	167.19	54.127		567.03	62.251	287.33	44.96	63.495	24.622	76.218		217.17	217.17	133.76	76.218	68.851	109.57	132.57	151.69	143.65	31.15
	74.419	133.35	51.231	208.63	1.5651	135.41	42.888		571.05	61.572	262.3	49	53.054	24.112	73.767		202.88	202.88	142.76	73.767	76.251	102.3	150.9	143.61	138.77	29.088
	71.005	148.88	55.426	207.41	1.4927	99.252	40.515		536.21	60.266	225.51	57.068	44.601	23.47	69.606		177.29	177.29	148.27	69.606	83.07	87.126	182.67	129.7	136.62	27.359
	68.861	160.63	62.137	196.54	4.6552	67.204	43.734		479.28	58.764	186.14	66.411	38.514	22.85	64.671		146.65	146.65	151.27	64.671	87.527	69.989	218.26	112.8	135.52	26.624
	68.128	163.3	71.702	170.15	10.23	47.753	49.513		417.06	57.494	153.38	74.275	35.17	22.407	59.9		117.21	117.21	152.73	59.9	87.845	56.812	248.04	95.758	133.79	27.542
	68.95	153.97	81.483	130.47	17.394	43.045	54.823		366.33	56.887	136.41	77.907	34.945	22.297	56.229		95.2	95.2	153.62	56.229	82.144	53.526	262.4	81.41	129.77	30.773
	71.57	136.17	88.843	86.321	25.325	47.421	56.631		321.91	57.214	137.66	76.584	40.346	22.766	53.799		79.904	79.904	151.8	53.799	71.611	64.515	256.72	67.864	121.2	38.339
	75.893	114.29	91.145	46.528	33.049	57.665	54.13		272.64	58.19	151	72.139	51.121	23.712	51.985		67.156	67.156	146.61	51.985	59.063	85.827	237.41	53.227	109.2	49.8
	81.554	92.689	85.938	19.912	41.115	70.561	49.341		226.24	59.405	172.79	65.661	63.511	24.764	50.577		58.046	58.046	141.29	50.577	47.318	110.88	211.41	40.338	97.143	62.123
	88.185	75.764	74.982	8.5903	50.983	82.891	43.475		190.44	60.452	199.4	58.236	73.757	25.55	49.363		53.663	53.663	139.07	49.363	39.192	133.11	185.63	32.035	88.393	72.274
	95.418	61.848	61.95	6.6815	64.114	97.362	37.743		172.99	60.923	227.16	50.954	78.1	25.702	48.133		55.098	55.098	143.17	48.133	35.309	145.91	167.02	31.156	86.318	77.221
	103.34	48.021	50.516	11.009	81.969	116.12	33.356		184.33	61.175	261.54	42.69	73.424	24.961	46.883		63.642	63.642	152.55	46.883	33.793	145.44	156.68	41.892	94.6	75.339
	112.2	36.777	44.352	18.396	111.42	135.1	29.287		219.31	61.479	304.97	32.718	62.234	23.574	45.752		78.569	78.569	165.03	45.752	33.705	136.07	150.01	62.352	110.99	68.651
	121.86	30.61	44.796	25.666	151.5	150.25	24.727		262.25	61.3	349.26	22.725	49.206	21.928	44.747		97.941	97.941	182.22	44.747	34.11	123.61	145.31	86.248	129.97	59.592
	132.2	32.015	49.398	35.451	191.9	157.51	21.219		297.45	60.103	386.24	14.397	39.013	20.409	43.875		119.82	119.82	205.72	43.875	34.072	113.85	140.93	107.29	146.03	50.6
	143.08	45.041	56.154	49.87	222.29	155.31	20.305		309.24	57.353	407.72	9.4194	36.332	19.404	43.143		142.27	142.27	237.13	43.143	33.574	112.6	135.17	119.2	153.63	44.111
	155.24	68.026	63.06	64.973	232.36	146.36	23.527		289.85	50.628	411.2	8.7545	45.24	18.576	42.662		169.78	169.78	289.08	42.662	33.241	123.71	126.53	120.24	148.81	39.432
	168.79	94.894	68.115	76.812	214.19	133.01	33.725		249.73	40.285	402.13	11.278	62.622	17.667	42.429		203.65	203.65	360.51	42.429	33.096	143.33	116.12	114.58	135.23	34.938
	182.59	119.57	71.55	81.438	174.65	117.59	49.872		200.54	29.956	384.28	15.547	82.358	17.183	42.274		237.14	237.14	432.46	42.274	33.165	165.66	106.22	104.85	118.87	31.669
	195.53	135.99	74.701	74.69	125.64	102.46	67.706		153.92	23.273	361.37	20.12	98.332	17.629	42.028		263.48	263.48	485.97	42.028	33.472	184.88	99.098	93.658	105.71	30.665
	206.47	142.26	77.219	59.202	79.027	85.393	82.966		121.54	23.868	337.16	23.552	104.42	19.512	41.523		275.94	275.94	502.07	41.523	34.202	195.22	97.036	83.62	101.72	32.965
	217.54	142.44	78.753	41.213	46.695	64.822	91.391		104.59	33.564	307.21	26.214	96.748	22.928	39.848		269.7	269.7	466.73	39.848	35.339	191.68	97.302	73.168	111.86	38.805
	229.5	139.34	78.952	26.964	30.744	44.081	90.412		95.304	49.942	269.03	29.068	79.382	27.539	37.117		249.26	249.26	392.6	37.117	36.605	178.15	98.378	60.56	132.17	47.492
	239.15	135.79	76.053	22.695	23.254	26.504	82.869		91.88	70.264	229.27	31.56	58.157	33.201	34.694		221.83	221.83	300.72	34.694	37.723	162.07	104.36	48.146	155.18	58.672
	243.3	134.62	70.288	31.456	21.075	15.422	72.617		92.516	91.792	194.57	33.133	38.904	39.77	33.941		194.65	194.65	212.13	33.941	38.415	150.91	119.35	38.276	173.42	71.99
	238.78	137.06	64.304	49.085	21.057	13.121	63.511		95.408	111.79	171.58	33.233	27.454	47.102	36.222		174.92	174.92	147.87	36.222	38.643	152.1	147.44	33.303	179.43	87.092
	219.59	141.24	60.748	71.011	20.05	17.378	59.404		98.133	132.71	161.99	30.914	25.6	57.531	42.864		162.36	162.36	108.98	42.864	38.592	172.43	200.36	35.627	169.5	108.49
	187.85	145.28	62.265	92.659	17.802	24.768	62.699		101.89	156.39	161.37	26.546	29.456	71.154	52.956		152.15	152.15	81.428	52.956	38.319	206.92	275.39	43.682	148.59	136.42
	152.56	147.35	71.373	109.46	16.414	31.862	70.828		110.32	179.13	167.18	21.548	36.33	84.468	64.511		144.73	144.73	63.663	64.511	37.881	245.41	354.92	53.865	122.28	164.11
	122.68	145.57	86.308	121.86	16.263	35.236	80.185		127.06	197.25	176.88	17.34	43.531	93.974	75.538		140.54	140.54	54.125	75.538	37.337	277.78	421.36	62.57	96.178	184.8
	107.19	137.48	103.29	132.91	17.725	33.91	87.167		155.74	207.06	187.92	15.34	48.369	96.172	84.049		140.03	140.03	51.256	84.049	36.507	293.85	457.09	66.193	75.852	191.72
	111.82	124.3	118.55	141.93	21.177	30.169	88.17		207.5	207.4	202.57	16.018	51.233	87.811	90.436		146.53	146.53	59.574	90.436	35.351	285.25	454.22	61.841	59.864	179.6
	89.159	171.91	77.634	111.36	154.8	118.57	103.09		91.405	86.679	318.91	61.504	146.75	23.43	55.679		165.18	165.18	74.291	55.679	26.929	106.64	175.36	104.64	161.64	65.369
	116.64	151.52	68.421	120.62	116.63	129.21	114.7		92.88	65.72	329.06	58.861	140.63	25.358	59.52		158.91	158.91	54.149	59.52	28.859	110.19	173.33	113.66	182.41	59.282
	132.28	142.8	61.027	129.86	81.35	141.26	122.55		114.19	52.139	335.08	55.978	132.98	26.501	62.821		160.33	160.33	45.715	62.821	34.74	110.53	170.96	120.72	192.88	53.865
	133.12	140.44	55.223	139.02	53.956	155.03	124		168.78	47.974	337.41	52.043	122.62	26.602	65.974		176.25	176.25	53.667	65.974	44.333	107.69	166.2	126.64	189.76	48.64
	124.64	141.28	50.78	148.03	35.206	167.15	115.91		250.96	50.177	336.88	46.998	109.28	25.993	69.343		205.49	205.49	73.61	69.343	55.286	104.67	158.02	132.22	177.47	42.713
	111.3	142.13	47.614	156.84	21.776	174.24	100.07		340.57	55.691	332.82	42.057	94.723	25.062	72.343		237.85	237.85	98.529	72.343	65.248	101.44	149.49	136.22	160.97	36.797
	97.553	139.82	45.876	168.8	12.523	172.91	81.147		417.44	61.455	324.53	38.435	80.711	24.193	74.39		263.17	263.17	121.41	74.39	71.87	97.965	143.7	137.42	145.17	31.609
	87.846	134.1	45.695	183.95	6.3051	158.37	63.827		461.43	64.413	311.33	37.349	69.011	23.773	74.896		271.25	271.25	135.24	74.896	74.751	94.194	143.74	134.59	135.03	27.864
	81.928	127.07	47.2	197.26	1.9799	132.88	52.788		464.37	64.223	288.17	40.096	58.802	23.969	73.364		256.91	256.91	136.87	73.364	75.459	88.365	153.22	126.06	132.27	25.168
	76.831	119.14	50.519	203.71	-0.21207	103.62	49.777		439.72	62.924	255.52	45.866	48.908	24.525	70.184		226.92	226.92	130.99	70.184	74.592	80.502	170.08	112.65	133.6	23.045
	72.936	110.68	57.825	198.27	0.49061	77.789	51.675		399.69	61.028	220.94	52.712	40.559	25.188	66.104		189.09	189.09	122.3	66.104	72.751	73.259	188.91	96.865	136.43	22.084
	70.619	102.09	69.032	174.73	3.7273	62.577	55.859		356.5	59.046	191.99	58.684	34.984	25.706	61.872		151.21	151.21	115.52	61.872	70.534	69.285	204.27	81.194	138.15	22.876
	70.26	93.063	80.881	136.43	9.1376	60.217	59.71		322.37	57.49	176.25	61.834	33.413	25.828	58.236		121.08	121.08	115.36	58.236	67.583	71.231	210.74	68.138	136.14	26.009
	71.563	83.349	90.113	92.709	16.361	65.915	60.605		293.39	56.117	175.94	61.871	38.528	25.434	55.02		96.396	96.396	123.64	55.02	63.499	82.517	204.94	55.84	127.61	33.465
	74.275	73.391	93.47	52.865	24.525	76.321	57.9		261.4	54.587	186.01	60.094	49.508	24.69	51.725		71.965	71.965	137.23	51.725	58.818	101.38	190.48	42.634	114.28	44.849
	78.84	63.636	88.232	26.215	33.869	88.084	53.343		232.28	53.263	203.13	56.94	62.331	23.778	48.616		51.233	51.233	153.38	48.616	54.081	122.68	172.44	31.307	100.38	57.192
	85.704	54.53	76.571	14.383	45.704	97.854	47.9		211.93	52.509	223.97	52.846	72.978	22.879	45.955		37.65	37.65	169.35	45.955	49.825	141.29	155.9	24.646	90.112	67.524
	95.311	44.404	62.567	11.161	61.336	107.07	42.538		206.22	52.69	245.23	48.249	77.425	22.176	44.005		34.663	34.663	182.42	44.005	45.944	152.09	145.92	25.437	87.699	72.875
	110.87	32.96	50.3	14.112	82.074	117.98	38.224		225.1	54.799	271.4	42.127	72.535	21.766	43.035		45.227	45.227	189.11	43.035	42.077	151.58	144.93	38.1	96.893	71.802
	132.09	22.703	43.852	20.8	115.73	128.4	33.809		264.62	58.59	304.72	34.189	60.989	21.53	42.867		67.04	67.04	191.26	42.867	38.387	143.17	149.56	60.777	114.88	66.285
	154.15	16.134	44.875	28.79	161.42	136.18	28.649		309.91	62.578	338.4	25.968	47.494	21.318	43.102		95.675	95.675	194.05	43.102	35.034	132.11	156.15	86.839	136.04	58.488
	172.24	15.758	50.647	41.512	207.44	139.14	24.466		346.05	65.275	365.66	18.996	36.759	20.98	43.339		126.7	126.7	202.68	43.339	32.18	123.66	161.09	109.66	154.73	50.579
	181.53	23.982	58.691	60.59	242.08	136.44	22.982		358.16	65.191	379.72	14.804	33.493	20.369	43.18		155.7	155.7	222.35	43.18	29.816	123.07	160.73	122.61	165.33	44.722
	176.62	39.137	66.529	80.879	253.64	129.53	25.921		338.27	60.041	377.61	14.139	41.185	18.811	42.596		186.31	186.31	263.74	42.596	27.837	134.09	151.51	123.75	165.17	40.249
	160.71	57.612	71.683	97.233	233.05	119.67	36.244		296.29	50.817	363.87	15.978	56.696	16.408	41.854		221.48	221.48	323.39	41.854	26.252	153.23	135.85	117.52	157.99	35.715
	141.93	75.796	73.872	104.51	188.14	108.14	52.802		244.2	40.948	342.92	19.204	74.792	14.165	40.995		255.74	255.74	385.27	40.995	25.073	174.84	119.1	106.8	147.81	32.125
	128.4	90.078	74.75	98.313	132.47	96.204	71.153		193.95	33.864	319.22	22.701	90.238	13.09	40.061		283.64	283.64	433.34	40.061	24.311	193.29	106.62	94.481	138.65	30.483
	128.24	99.92	74.736	82.079	79.604	82.018	86.854		157.52	32.995	297.2	25.35	97.8	14.189	39.093		299.69	299.69	451.56	39.093	23.821	202.93	103.77	83.46	134.51	31.792
	149.83	107.73	74.246	62.391	43.108	64.732	95.462		135.23	39.628	274.11	27.554	94.726	18.054	36.868		300.94	300.94	430.64	36.868	23.593	199.61	108.23	71.969	137.87	36.231
	187.77	114.31	73.7	45.832	25.136	47.121	94.331		119.13	51.475	246.99	30.057	84.507	24.012	33.358		291.02	291.02	381.27	33.358	23.849	187.1	116.45	58.079	146.05	43.13
	229.47	120.48	72.055	38.986	16.642	31.957	86.422		108.69	66.607	219.98	32.258	71.269	31.179	30.398		274.4	274.4	317.39	30.398	24.807	171.61	131.88	44.441	155.35	52.223
	262.36	127.03	69.034	44.659	14.4	22.011	75.705		103.38	83.095	197.2	33.554	59.137	38.669	29.824		255.53	255.53	252.95	29.824	26.686	159.35	157.98	33.705	162.05	63.242
	273.86	135.82	66.197	58.461	15.179	18.899	66.15		102.71	99.008	182.81	33.344	52.238	45.597	33.472		238.86	238.86	201.9	33.472	30.426	156.54	198.2	28.52	162.43	75.92
	255.58	146.32	65.109	76.185	15.75	20.77	61.726		106.01	116.66	178.89	30.467	51.775	53.329	43.8		221.95	221.95	161.39	43.8	35.879	168.18	268.14	31.56	154.49	93.765
	215.9	155.74	67.331	93.622	16.648	25.205	64.983		113.65	137.35	182.68	25.325	54.996	62.454	59.585		201.81	201.81	122.13	59.585	41.639	190.14	365.48	41.059	140.7	116.95
	167.42	161.3	74.427	106.57	20.027	29.786	73.275		126.57	157.58	191.05	19.658	60.099	70.926	77.139		182.14	182.14	88.375	77.139	46.296	214.89	466.86	53.005	124.07	140.23
	122.7	160.23	85.356	114.72	25.084	32.09	82.777		145.75	173.9	200.84	15.209	65.279	76.695	92.769		166.63	166.63	64.405	92.769	48.443	234.94	548.88	63.39	107.62	158.32
	94.338	148.03	97.772	120.88	31.015	31.722	89.666		172.16	182.82	208.93	13.719	68.734	77.715	102.79		158.95	158.95	54.483	102.79	46.848	242.76	588.18	68.204	94.339	165.97
	85.896	126.55	109.33	125.51	37.016	30.294	90.119		214.94	183.22	213.29	16.124	70.985	71.868	106.23		162.79	162.79	65.249	106.23	42.449	231.03	571.75	64.434	83.457	159.77
	51.298	90.309	61.227	33.118	131.65	164.59	25.094		213.04	56.335	362.64	10.902	53.919	21.838	42.021		162.98	162.98	177.31	42.021	37.477	98.936	106.92	92.958	137.86	45.345
	66.678	179.93	60.987	206.39	12.53	93.804	32.064		585.27	61.527	202.07	61.692	43.266	22.984	68.117		143.87	143.87	165.1	68.117	92.056	91.263	188.17	139.59	142.49	31.748
	66.439	213.59	66.917	193.6	19.868	65.744	36.947		522.24	60.232	161.82	71.963	40.156	21.694	63.895		118.9	118.9	176.27	63.895	101.79	69.968	233.03	121.88	137.47	31.06
	67.398	228.92	75.471	168.01	29.234	48.735	44.443		452.14	59.245	128.46	80.555	39.519	20.775	59.885		95.823	95.823	183.35	59.885	104.38	52.616	270.81	103.95	132.17	31.827
	69.53	220.33	84.27	131.02	39.08	44.438	51.205		393.23	58.898	111.69	84.387	40.719	20.593	56.86		79.631	79.631	184.61	56.86	96.8	46.58	289.66	88.9	125.94	34.734
	73.722	195.3	90.933	90.308	47.857	48	53.889		339.18	59.639	113.94	82.615	45.854	21.613	55.059		70.321	70.321	175.13	55.059	81.489	56.395	284.44	75.001	116.96	41.673
	79.991	162.21	93.083	53.538	54.467	56.935	51.39		277.83	61.246	128.73	77.292	55.348	23.59	53.97		64.563	64.563	156.06	53.97	62.98	77.145	263.04	60.164	105.65	52.185
	87.005	129.42	88.64	28.382	59.941	68.754	45.94		218.67	63.048	152.43	69.685	66.053	25.827	53.229		62.365	62.365	134.78	53.229	45.809	102.03	233.18	47.008	94.764	63.437
	93.437	105.3	79.192	16.756	65.929	80.969	39.193		171.17	64.372	181.4	61.06	74.824	27.628	52.475		63.731	63.731	118.68	52.475	34.511	124.25	202.58	38.152	87.024	72.591
	97.956	88.308	67.855	13.549	74.079	96.74	32.802		144.81	64.546	212.01	52.682	78.514	28.296	51.347		68.668	68.668	115.17	51.347	30.156	136.99	178.95	36.214	85.165	76.813
	97.166	72.861	57.745	15.882	86.043	117.72	28.421		150.03	63.658	250.03	43.314	74.344	27.357	49.632		78.016	78.016	124.77	49.632	29.722	136.51	162.39	45.018	92.886	74.497
	91.954	61.282	51.979	20.88	106.88	139.18	25.445		180.49	62.154	297.89	32.112	64.411	25.275	47.573		91.773	91.773	142.56	47.573	31.601	127.35	147.75	62.818	108.36	67.533
	87.414	55.897	51.369	25.665	135.48	156.38	22.771		220.57	59.906	346.92	20.933	52.886	22.761	45.485		108.68	108.68	167.73	45.485	34.188	115.13	134.89	83.88	126.05	58.33
	88.639	59.029	53.838	32.407	164.27	164.57	21.307		254.62	56.782	388.46	11.633	43.937	20.529	43.686		127.46	127.46	199.48	43.686	35.875	105.47	123.65	102.47	140.41	49.294
	100.72	76.211	58.167	43.024	185.66	161.8	21.961		267.01	52.652	413.86	6.0685	41.734	19.29	42.492		146.86	146.86	236.99	42.492	36.733	104.01	113.87	112.84	145.88	42.835
	131.2	105.89	63.136	54.261	192.05	151.22	25.64		250.75	45.014	421.17	5.3143	50.313	18.858	42.161		171.4	171.4	293.63	42.161	37.832	114.23	105.22	113.4	137.55	38.215
	176.68	139.78	67.524	62.865	177.42	135.78	34.639		216.26	33.954	416.16	8.1327	66.892	18.758	42.483		201.9	201.9	369.93	42.483	39.068	132.38	97.814	107.94	119.11	33.828
	225.85	169.56	72.289	65.581	146.84	118.41	48.351		174.03	23.227	401.76	12.912	85.421	19.269	43.07		231.61	231.61	445.86	43.07	40.336	153.23	92.138	98.915	97.954	30.78
	267.41	186.96	78.243	58.56	109.33	102.05	63.337		134.53	16.585	380.86	18.04	99.849	20.67	43.534		253.76	253.76	501.37	43.534	41.534	171.55	88.694	88.734	81.457	30.177
	290.07	188.73	83.953	43.97	73.938	84.565	76.157		108.25	17.782	356.38	21.905	104.13	23.242	43.489		261.59	261.59	516.41	43.489	43.022	182.11	87.982	79.826	77.004	33.124
	288.93	180.43	87.982	27.587	49.699	64.013	83.372		96.661	28.924	322.71	24.866	93.995	26.973	42.217		249.17	249.17	474.69	42.217	44.872	179.98	87.52	70.985	91.204	40.008
	271.54	166.87	88.895	15.186	38.758	43.568	82.799		92.777	47.51	277.91	27.998	73.487	31.679	39.978		221	221	389.58	39.978	46.538	168.63	86.975	60.594	119.13	50.094
	245.22	152.89	83.925	12.542	35.09	26.409	76.73		94.383	70.378	230.4	30.762	48.991	37.373	37.845		185.99	185.99	285.51	37.845	47.477	155.48	90.07	50.463	150.88	62.798
	217.27	143.32	74.027	22.624	35.477	15.713	68.441		99.264	94.368	188.57	32.62	26.894	44.069	36.894		153.03	153.03	186.91	36.894	47.144	147.93	100.53	42.399	176.54	77.539
	195.02	138.67	63.354	41.582	36.701	13.915	61.205		105.2	116.32	160.86	33.033	13.584	51.778	38.198		131.02	131.02	118.21	38.198	44.853	153.39	122.07	38.212	186.19	93.736
	175.29	135.74	56.061	64.963	35.543	18.897	58.297		109.21	138.74	148.72	31.216	11.065	63.158	42.143		121.21	121.21	83.057	42.143	40.969	179.57	163.55	39.912	174.84	116.16
	110.99	115.43	47.092	180.38	26.547	183.26	109.27		267.78	52.487	302.12	57.068	116.54	25.96	73.316		181.07	181.07	69.011	73.316	51.506	83.607	157.65	141.81	183.46	40.904
	99.093	111.95	45.219	187.95	14.634	189.59	92.23		395.2	56.082	302.82	50.84	96.619	25.543	75.369		200.23	200.23	93.432	75.369	57.26	96.205	142.27	149.04	168.58	36.879
	87.154	112.07	45.622	195.56	7.5915	186.12	72.211		504.69	60.325	298.8	46.185	77.933	25.065	76.544		214.9	214.9	117.1	76.544	62.647	106.22	131.82	152.87	153.95	33.601
	78.961	119.31	47.794	203.57	3.7808	167.19	54.127		567.03	62.251	287.33	44.96	63.495	24.622	76.218		217.17	217.17	133.76	76.218	68.851	109.57	132.57	151.69	143.65	31.15
	74.419	133.35	51.231	208.63	1.5651	135.41	42.888		571.05	61.572	262.3	49	53.054	24.112	73.767		202.88	202.88	142.76	73.767	76.251	102.3	150.9	143.61	138.77	29.088
	71.005	148.88	55.426	207.41	1.4927	99.252	40.515		536.21	60.266	225.51	57.068	44.601	23.47	69.606		177.29	177.29	148.27	69.606	83.07	87.126	182.67	129.7	136.62	27.359
	68.861	160.63	62.137	196.54	4.6552	67.204	43.734		479.28	58.764	186.14	66.411	38.514	22.85	64.671		146.65	146.65	151.27	64.671	87.527	69.989	218.26	112.8	135.52	26.624
	68.128	163.3	71.702	170.15	10.23	47.753	49.513		417.06	57.494	153.38	74.275	35.17	22.407	59.9		117.21	117.21	152.73	59.9	87.845	56.812	248.04	95.758	133.79	27.542
	68.95	153.97	81.483	130.47	17.394	43.045	54.823		366.33	56.887	136.41	77.907	34.945	22.297	56.229		95.2	95.2	153.62	56.229	82.144	53.526	262.4	81.41	129.77	30.773
	71.57	136.17	88.843	86.321	25.325	47.421	56.631		321.91	57.214	137.66	76.584	40.346	22.766	53.799		79.904	79.904	151.8	53.799	71.611	64.515	256.72	67.864	121.2	38.339
	75.893	114.29	91.145	46.528	33.049	57.665	54.13		272.64	58.19	151	72.139	51.121	23.712	51.985		67.156	67.156	146.61	51.985	59.063	85.827	237.41	53.227	109.2	49.8
	81.554	92.689	85.938	19.912	41.115	70.561	49.341		226.24	59.405	172.79	65.661	63.511	24.764	50.577		58.046	58.046	141.29	50.577	47.318	110.88	211.41	40.338	97.143	62.123
	88.185	75.764	74.982	8.5903	50.983	82.891	43.475		190.44	60.452	199.4	58.236	73.757	25.55	49.363		53.663	53.663	139.07	49.363	39.192	133.11	185.63	32.035	88.393	72.274
	95.418	61.848	61.95	6.6815	64.114	97.362	37.743		172.99	60.923	227.16	50.954	78.1	25.702	48.133		55.098	55.098	143.17	48.133	35.309	145.91	167.02	31.156	86.318	77.221
	103.34	48.021	50.516	11.009	81.969	116.12	33.356		184.33	61.175	261.54	42.69	73.424	24.961	46.883		63.642	63.642	152.55	46.883	33.793	145.44	156.68	41.892	94.6	75.339
	112.2	36.777	44.352	18.396	111.42	135.1	29.287		219.31	61.479	304.97	32.718	62.234	23.574	45.752		78.569	78.569	165.03	45.752	33.705	136.07	150.01	62.352	110.99	68.651
	121.86	30.61	44.796	25.666	151.5	150.25	24.727		262.25	61.3	349.26	22.725	49.206	21.928	44.747		97.941	97.941	182.22	44.747	34.11	123.61	145.31	86.248	129.97	59.592
	132.2	32.015	49.398	35.451	191.9	157.51	21.219		297.45	60.103	386.24	14.397	39.013	20.409	43.875		119.82	119.82	205.72	43.875	34.072	113.85	140.93	107.29	146.03	50.6
	143.08	45.041	56.154	49.87	222.29	155.31	20.305		309.24	57.353	407.72	9.4194	36.332	19.404	43.143		142.27	142.27	237.13	43.143	33.574	112.6	135.17	119.2	153.63	44.111
	155.24	68.026	63.06	64.973	232.36	146.36	23.527		289.85	50.628	411.2	8.7545	45.24	18.576	42.662		169.78	169.78	289.08	42.662	33.241	123.71	126.53	120.24	148.81	39.432
	168.79	94.894	68.115	76.812	214.19	133.01	33.725		249.73	40.285	402.13	11.278	62.622	17.667	42.429		203.65	203.65	360.51	42.429	33.096	143.33	116.12	114.58	135.23	34.938
	182.59	119.57	71.55	81.438	174.65	117.59	49.872		200.54	29.956	384.28	15.547	82.358	17.183	42.274		237.14	237.14	432.46	42.274	33.165	165.66	106.22	104.85	118.87	31.669
	195.53	135.99	74.701	74.69	125.64	102.46	67.706		153.92	23.273	361.37	20.12	98.332	17.629	42.028		263.48	263.48	485.97	42.028	33.472	184.88	99.098	93.658	105.71	30.665
	206.47	142.26	77.219	59.202	79.027	85.393	82.966		121.54	23.868	337.16	23.552	104.42	19.512	41.523		275.94	275.94	502.07	41.523	34.202	195.22	97.036	83.62	101.72	32.965
	217.54	142.44	78.753	41.213	46.695	64.822	91.391		104.59	33.564	307.21	26.214	96.748	22.928	39.848		269.7	269.7	466.73	39.848	35.339	191.68	97.302	73.168	111.86	38.805
	229.5	139.34	78.952	26.964	30.744	44.081	90.412		95.304	49.942	269.03	29.068	79.382	27.539	37.117		249.26	249.26	392.6	37.117	36.605	178.15	98.378	60.56	132.17	47.492
	239.15	135.79	76.053	22.695	23.254	26.504	82.869		91.88	70.264	229.27	31.56	58.157	33.201	34.694		221.83	221.83	300.72	34.694	37.723	162.07	104.36	48.146	155.18	58.672
	243.3	134.62	70.288	31.456	21.075	15.422	72.617		92.516	91.792	194.57	33.133	38.904	39.77	33.941		194.65	194.65	212.13	33.941	38.415	150.91	119.35	38.276	173.42	71.99
	238.78	137.06	64.304	49.085	21.057	13.121	63.511		95.408	111.79	171.58	33.233	27.454	47.102	36.222		174.92	174.92	147.87	36.222	38.643	152.1	147.44	33.303	179.43	87.092
	219.59	141.24	60.748	71.011	20.05	17.378	59.404		98.133	132.71	161.99	30.914	25.6	57.531	42.864		162.36	162.36	108.98	42.864	38.592	172.43	200.36	35.627	169.5	108.49
	187.85	145.28	62.265	92.659	17.802	24.768	62.699		101.89	156.39	161.37	26.546	29.456	71.154	52.956		152.15	152.15	81.428	52.956	38.319	206.92	275.39	43.682	148.59	136.42
	152.56	147.35	71.373	109.46	16.414	31.862	70.828		110.32	179.13	167.18	21.548	36.33	84.468	64.511		144.73	144.73	63.663	64.511	37.881	245.41	354.92	53.865	122.28	164.11
	122.68	145.57	86.308	121.86	16.263	35.236	80.185		127.06	197.25	176.88	17.34	43.531	93.974	75.538		140.54	140.54	54.125	75.538	37.337	277.78	421.36	62.57	96.178	184.8
	107.19	137.48	103.29	132.91	17.725	33.91	87.167		155.74	207.06	187.92	15.34	48.369	96.172	84.049		140.03	140.03	51.256	84.049	36.507	293.85	457.09	66.193	75.852	191.72
	111.82	124.3	118.55	141.93	21.177	30.169	88.17		207.5	207.4	202.57	16.018	51.233	87.811	90.436		146.53	146.53	59.574	90.436	35.351	285.25	454.22	61.841	59.864	179.6
	89.159	171.91	77.634	111.36	154.8	118.57	103.09		91.405	86.679	318.91	61.504	146.75	23.43	55.679		165.18	165.18	74.291	55.679	26.929	106.64	175.36	104.64	161.64	65.369
	116.64	151.52	68.421	120.62	116.63	129.21	114.7		92.88	65.72	329.06	58.861	140.63	25.358	59.52		158.91	158.91	54.149	59.52	28.859	110.19	173.33	113.66	182.41	59.282
	132.28	142.8	61.027	129.86	81.35	141.26	122.55		114.19	52.139	335.08	55.978	132.98	26.501	62.821		160.33	160.33	45.715	62.821	34.74	110.53	170.96	120.72	192.88	53.865
	133.12	140.44	55.223	139.02	53.956	155.03	124		168.78	47.974	337.41	52.043	122.62	26.602	65.974		176.25	176.25	53.667	65.974	44.333	107.69	166.2	126.64	189.76	48.64
	124.64	141.28	50.78	148.03	35.206	167.15	115.91		250.96	50.177	336.88	46.998	109.28	25.993	69.343		205.49	205.49	73.61	69.343	55.286	104.67	158.02	132.22	177.47	42.713
	111.3	142.13	47.614	156.84	21.776	174.24	100.07		340.57	55.691	332.82	42.057	94.723	25.062	72.343		237.85	237.85	98.529	72.343	65.248	101.44	149.49	136.22	160.97	36.797
	97.553	139.82	45.876	168.8	12.523	172.91	81.147		417.44	61.455	324.53	38.435	80.711	24.193	74.39		263.17	263.17	121.41	74.39	71.87	97.965	143.7	137.42	145.17	31.609
	87.846	134.1	45.695	183.95	6.3051	158.37	63.827		461.43	64.413	311.33	37.349	69.011	23.773	74.896		271.25	271.25	135.24	74.896	74.751	94.194	143.74	134.59	135.03	27.864
	81.928	127.07	47.2	197.26	1.9799	132.88	52.788		464.37	64.223	288.17	40.096	58.802	23.969	73.364		256.91	256.91	136.87	73.364	75.459	88.365	153.22	126.06	132.27	25.168
	76.831	119.14	50.519	203.71	-0.21207	103.62	49.777		439.72	62.924	255.52	45.866	48.908	24.525	70.184		226.92	226.92	130.99	70.184	74.592	80.502	170.08	112.65	133.6	23.045
	72.936	110.68	57.825	198.27	0.49061	77.789	51.675		399.69	61.028	220.94	52.712	40.559	25.188	66.104		189.09	189.09	122.3	66.104	72.751	73.259	188.91	96.865	136.43	22.084
	70.619	102.09	69.032	174.73	3.7273	62.577	55.859		356.5	59.046	191.99	58.684	34.984	25.706	61.872		151.21	151.21	115.52	61.872	70.534	69.285	204.27	81.194	138.15	22.876
	70.26	93.063	80.881	136.43	9.1376	60.217	59.71		322.37	57.49	176.25	61.834	33.413	25.828	58.236		121.08	121.08	115.36	58.236	67.583	71.231	210.74	68.138	136.14	26.009
	71.563	83.349	90.113	92.709	16.361	65.915	60.605		293.39	56.117	175.94	61.871	38.528	25.434	55.02		96.396	96.396	123.64	55.02	63.499	82.517	204.94	55.84	127.61	33.465
	74.275	73.391	93.47	52.865	24.525	76.321	57.9		261.4	54.587	186.01	60.094	49.508	24.69	51.725		71.965	71.965	137.23	51.725	58.818	101.38	190.48	42.634	114.28	44.849
	78.84	63.636	88.232	26.215	33.869	88.084	53.343		232.28	53.263	203.13	56.94	62.331	23.778	48.616		51.233	51.233	153.38	48.616	54.081	122.68	172.44	31.307	100.38	57.192
	85.704	54.53	76.571	14.383	45.704	97.854	47.9		211.93	52.509	223.97	52.846	72.978	22.879	45.955		37.65	37.65	169.35	45.955	49.825	141.29	155.9	24.646	90.112	67.524
	95.311	44.404	62.567	11.161	61.336	107.07	42.538		206.22	52.69	245.23	48.249	77.425	22.176	44.005		34.663	34.663	182.42	44.005	45.944	152.09	145.92	25.437	87.699	72.875
	110.87	32.96	50.3	14.112	82.074	117.98	38.224		225.1	54.799	271.4	42.127	72.535	21.766	43.035		45.227	45.227	189.11	43.035	42.077	151.58	144.93	38.1	96.893	71.802
	132.09	22.703	43.852	20.8	115.73	128.4	33.809		264.62	58.59	304.72	34.189	60.989	21.53	42.867		67.04	67.04	191.26	42.867	38.387	143.17	149.56	60.777	114.88	66.285
	154.15	16.134	44.875	28.79	161.42	136.18	28.649		309.91	62.578	338.4	25.968	47.494	21.318	43.102		95.675	95.675	194.05	43.102	35.034	132.11	156.15	86.839	136.04	58.488
	172.24	15.758	50.647	41.512	207.44	139.14	24.466		346.05	65.275	365.66	18.996	36.759	20.98	43.339		126.7	126.7	202.68	43.339	32.18	123.66	161.09	109.66	154.73	50.579
	181.53	23.982	58.691	60.59	242.08	136.44	22.982		358.16	65.191	379.72	14.804	33.493	20.369	43.18		155.7	155.7	222.35	43.18	29.816	123.07	160.73	122.61	165.33	44.722
	176.62	39.137	66.529	80.879	253.64	129.53	25.921		338.27	60.041	377.61	14.139	41.185	18.811	42.596		186.31	186.31	263.74	42.596	27.837	134.09	151.51	123.75	165.17	40.249
	160.71	57.612	71.683	97.233	233.05	119.67	36.244		296.29	50.817	363.87	15.978	56.696	16.408	41.854		221.48	221.48	323.39	41.854	26.252	153.23	135.85	117.52	157.99	35.715
	141.93	75.796	73.872	104.51	188.14	108.14	52.802		244.2	40.948	342.92	19.204	74.792	14.165	40.995		255.74	255.74	385.27	40.995	25.073	174.84	119.1	106.8	147.81	32.125
	128.4	90.078	74.75	98.313	132.47	96.204	71.153		193.95	33.864	319.22	22.701	90.238	13.09	40.061		283.64	283.64	433.34	40.061	24.311	193.29	106.62	94.481	138.65	30.483
	128.24	99.92	74.736	82.079	79.604	82.018	86.854		157.52	32.995	297.2	25.35	97.8	14.189	39.093		299.69	299.69	451.56	39.093	23.821	202.93	103.77	83.46	134.51	31.792
	149.83	107.73	74.246	62.391	43.108	64.732	95.462		135.23	39.628	274.11	27.554	94.726	18.054	36.868		300.94	300.94	430.64	36.868	23.593	199.61	108.23	71.969	137.87	36.231
	187.77	114.31	73.7	45.832	25.136	47.121	94.331		119.13	51.475	246.99	30.057	84.507	24.012	33.358		291.02	291.02	381.27	33.358	23.849	187.1	116.45	58.079	146.05	43.13
	229.47	120.48	72.055	38.986	16.642	31.957	86.422		108.69	66.607	219.98	32.258	71.269	31.179	30.398		274.4	274.4	317.39	30.398	24.807	171.61	131.88	44.441	155.35	52.223
	262.36	127.03	69.034	44.659	14.4	22.011	75.705		103.38	83.095	197.2	33.554	59.137	38.669	29.824		255.53	255.53	252.95	29.824	26.686	159.35	157.98	33.705	162.05	63.242
	273.86	135.82	66.197	58.461	15.179	18.899	66.15		102.71	99.008	182.81	33.344	52.238	45.597	33.472		238.86	238.86	201.9	33.472	30.426	156.54	198.2	28.52	162.43	75.92
	255.58	146.32	65.109	76.185	15.75	20.77	61.726		106.01	116.66	178.89	30.467	51.775	53.329	43.8		221.95	221.95	161.39	43.8	35.879	168.18	268.14	31.56	154.49	93.765
	215.9	155.74	67.331	93.622	16.648	25.205	64.983		113.65	137.35	182.68	25.325	54.996	62.454	59.585		201.81	201.81	122.13	59.585	41.639	190.14	365.48	41.059	140.7	116.95
	167.42	161.3	74.427	106.57	20.027	29.786	73.275		126.57	157.58	191.05	19.658	60.099	70.926	77.139		182.14	182.14	88.375	77.139	46.296	214.89	466.86	53.005	124.07	140.23
	122.7	160.23	85.356	114.72	25.084	32.09	82.777		145.75	173.9	200.84	15.209	65.279	76.695	92.769		166.63	166.63	64.405	92.769	48.443	234.94	548.88	63.39	107.62	158.32
	94.338	148.03	97.772	120.88	31.015	31.722	89.666		172.16	182.82	208.93	13.719	68.734	77.715	102.79		158.95	158.95	54.483	102.79	46.848	242.76	588.18	68.204	94.339	165.97
	85.896	126.55	109.33	125.51	37.016	30.294	90.119		214.94	183.22	213.29	16.124	70.985	71.868	106.23		162.79	162.79	65.249	106.23	42.449	231.03	571.75	64.434	83.457	159.77
	51.298	90.309	61.227	33.118	131.65	164.59	25.094		213.04	56.335	362.64	10.902	53.919	21.838	42.021		162.98	162.98	177.31	42.021	37.477	98.936	106.92	92.958	137.86	45.345
	66.678	179.93	60.987	206.39	12.53	93.804	32.064		585.27	61.527	202.07	61.692	43.266	22.984	68.117		143.87	143.87	165.1	68.117	92.056	91.263	188.17	139.59	142.49	31.748
	66.439	213.59	66.917	193.6	19.868	65.744	36.947		522.24	60.232	161.82	71.963	40.156	21.694	63.895		118.9	118.9	176.27	63.895	101.79	69.968	233.03	121.88	137.47	31.06
	67.398	228.92	75.471	168.01	29.234	48.735	44.443		452.14	59.245	128.46	80.555	39.519	20.775	59.885		95.823	95.823	183.35	59.885	104.38	52.616	270.81	103.95	132.17	31.827
	69.53	220.33	84.27	131.02	39.08	44.438	51.205		393.23	58.898	111.69	84.387	40.719	20.593	56.86		79.631	79.631	184.61	56.86	96.8	46.58	289.66	88.9	125.94	34.734
	73.722	195.3	90.933	90.308	47.857	48	53.889		339.18	59.639	113.94	82.615	45.854	21.613	55.059		70.321	70.321	175.13	55.059	81.489	56.395	284.44	75.001	116.96	41.673
	79.991	162.21	93.083	53.538	54.467	56.935	51.39		277.83	61.246	128.73	77.292	55.348	23.59	53.97		64.563	64.563	156.06	53.97	62.98	77.145	263.04	60.164	105.65	52.185
	87.005	129.42	88.64	28.382	59.941	68.754	45.94		218.67	63.048	152.43	69.685	66.053	25.827	53.229		62.365	62.365	134.78	53.229	45.809	102.03	233.18	47.008	94.764	63.437
	93.437	105.3	79.192	16.756	65.929	80.969	39.193		171.17	64.372	181.4	61.06	74.824	27.628	52.475		63.731	63.731	118.68	52.475	34.511	124.25	202.58	38.152	87.024	72.591
	97.956	88.308	67.855	13.549	74.079	96.74	32.802		144.81	64.546	212.01	52.682	78.514	28.296	51.347		68.668	68.668	115.17	51.347	30.156	136.99	178.95	36.214	85.165	76.813
	97.166	72.861	57.745	15.882	86.043	117.72	28.421		150.03	63.658	250.03	43.314	74.344	27.357	49.632		78.016	78.016	124.77	49.632	29.722	136.51	162.39	45.018	92.886	74.497
	91.954	61.282	51.979	20.88	106.88	139.18	25.445		180.49	62.154	297.89	32.112	64.411	25.275	47.573		91.773	91.773	142.56	47.573	31.601	127.35	147.75	62.818	108.36	67.533
	87.414	55.897	51.369	25.665	135.48	156.38	22.771		220.57	59.906	346.92	20.933	52.886	22.761	45.485		108.68	108.68	167.73	45.485	34.188	115.13	134.89	83.88	126.05	58.33
	88.639	59.029	53.838	32.407	164.27	164.57	21.307		254.62	56.782	388.46	11.633	43.937	20.529	43.686		127.46	127.46	199.48	43.686	35.875	105.47	123.65	102.47	140.41	49.294
	100.72	76.211	58.167	43.024	185.66	161.8	21.961		267.01	52.652	413.86	6.0685	41.734	19.29	42.492		146.86	146.86	236.99	42.492	36.733	104.01	113.87	112.84	145.88	42.835
	131.2	105.89	63.136	54.261	192.05	151.22	25.64		250.75	45.014	421.17	5.3143	50.313	18.858	42.161		171.4	171.4	293.63	42.161	37.832	114.23	105.22	113.4	137.55	38.215
	176.68	139.78	67.524	62.865	177.42	135.78	34.639		216.26	33.954	416.16	8.1327	66.892	18.758	42.483		201.9	201.9	369.93	42.483	39.068	132.38	97.814	107.94	119.11	33.828
	225.85	169.56	72.289	65.581	146.84	118.41	48.351		174.03	23.227	401.76	12.912	85.421	19.269	43.07		231.61	231.61	445.86	43.07	40.336	153.23	92.138	98.915	97.954	30.78
	267.41	186.96	78.243	58.56	109.33	102.05	63.337		134.53	16.585	380.86	18.04	99.849	20.67	43.534		253.76	253.76	501.37	43.534	41.534	171.55	88.694	88.734	81.457	30.177
	290.07	188.73	83.953	43.97	73.938	84.565	76.157		108.25	17.782	356.38	21.905	104.13	23.242	43.489		261.59	261.59	516.41	43.489	43.022	182.11	87.982	79.826	77.004	33.124
	288.93	180.43	87.982	27.587	49.699	64.013	83.372		96.661	28.924	322.71	24.866	93.995	26.973	42.217		249.17	249.17	474.69	42.217	44.872	179.98	87.52	70.985	91.204	40.008
	271.54	166.87	88.895	15.186	38.758	43.568	82.799		92.777	47.51	277.91	27.998	73.487	31.679	39.978		221	221	389.58	39.978	46.538	168.63	86.975	60.594	119.13	50.094
	245.22	152.89	83.925	12.542	35.09	26.409	76.73		94.383	70.378	230.4	30.762	48.991	37.373	37.845		185.99	185.99	285.51	37.845	47.477	155.48	90.07	50.463	150.88	62.798
	217.27	143.32	74.027	22.624	35.477	15.713	68.441		99.264	94.368	188.57	32.62	26.894	44.069	36.894		153.03	153.03	186.91	36.894	47.144	147.93	100.53	42.399	176.54	77.539
	195.02	138.67	63.354	41.582	36.701	13.915	61.205		105.2	116.32	160.86	33.033	13.584	51.778	38.198		131.02	131.02	118.21	38.198	44.853	153.39	122.07	38.212	186.19	93.736
	175.29	135.74	56.061	64.963	35.543	18.897	58.297		109.21	138.74	148.72	31.216	11.065	63.158	42.143		121.21	121.21	83.057	42.143	40.969	179.57	163.55	39.912	174.84	116.16
	110.99	115.43	47.092	180.38	26.547	183.26	109.27		267.78	52.487	302.12	57.068	116.54	25.96	73.316		181.07	181.07	69.011	73.316	51.506	83.607	157.65	141.81	183.46	40.904
	99.093	111.95	45.219	187.95	14.634	189.59	92.23		395.2	56.082	302.82	50.84	96.619	25.543	75.369		200.23	200.23	93.432	75.369	57.26	96.205	142.27	149.04	168.58	36.879
	87.154	112.07	45.622	195.56	7.5915	186.12	72.211		504.69	60.325	298.8	46.185	77.933	25.065	76.544		214.9	214.9	117.1	76.544	62.647	106.22	131.82	152.87	153.95	33.601
	78.961	119.31	47.794	203.57	3.7808	167.19	54.127		567.03	62.251	287.33	44.96	63.495	24.622	76.218		217.17	217.17	133.76	76.218	68.851	109.57	132.57	151.69	143.65	31.15
	74.419	133.35	51.231	208.63	1.5651	135.41	42.888		571.05	61.572	262.3	49	53.054	24.112	73.767		202.88	202.88	142.76	73.767	76.251	102.3	150.9	143.61	138.77	29.088
	71.005	148.88	55.426	207.41	1.4927	99.252	40.515		536.21	60.266	225.51	57.068	44.601	23.47	69.606		177.29	177.29	148.27	69.606	83.07	87.126	182.67	129.7	136.62	27.359
	68.861	160.63	62.137	196.54	4.6552	67.204	43.734		479.28	58.764	186.14	66.411	38.514	22.85	64.671		146.65	146.65	151.27	64.671	87.527	69.989	218.26	112.8	135.52	26.624
	68.128	163.3	71.702	170.15	10.23	47.753	49.513		417.06	57.494	153.38	74.275	35.17	22.407	59.9		117.21	117.21	152.73	59.9	87.845	56.812	248.04	95.758	133.79	27.542
	68.95	153.97	81.483	130.47	17.394	43.045	54.823		366.33	56.887	136.41	77.907	34.945	22.297	56.229		95.2	95.2	153.62	56.229	82.144	53.526	262.4	81.41	129.77	30.773
	71.57	136.17	88.843	86.321	25.325	47.421	56.631		321.91	57.214	137.66	76.584	40.346	22.766	53.799		79.904	79.904	151.8	53.799	71.611	64.515	256.72	67.864	121.2	38.339
	75.893	114.29	91.145	46.528	33.049	57.665	54.13		272.64	58.19	151	72.139	51.121	23.712	51.985		67.156	67.156	146.61	51.985	59.063	85.827	237.41	53.227	109.2	49.8
	81.554	92.689	85.938	19.912	41.115	70.561	49.341		226.24	59.405	172.79	65.661	63.511	24.764	50.577		58.046	58.046	141.29	50.577	47.318	110.88	211.41	40.338	97.143	62.123
	88.185	75.764	74.982	8.5903	50.983	82.891	43.475		190.44	60.452	199.4	58.236	73.757	25.55	49.363		53.663	53.663	139.07	49.363	39.192	133.11	185.63	32.035	88.393	72.274
	95.418	61.848	61.95	6.6815	64.114	97.362	37.743		172.99	60.923	227.16	50.954	78.1	25.702	48.133		55.098	55.098	143.17	48.133	35.309	145.91	167.02	31.156	86.318	77.221
	103.34	48.021	50.516	11.009	81.969	116.12	33.356		184.33	61.175	261.54	42.69	73.424	24.961	46.883		63.642	63.642	152.55	46.883	33.793	145.44	156.68	41.892	94.6	75.339
	112.2	36.777	44.352	18.396	111.42	135.1	29.287		219.31	61.479	304.97	32.718	62.234	23.574	45.752		78.569	78.569	165.03	45.752	33.705	136.07	150.01	62.352	110.99	68.651
	121.86	30.61	44.796	25.666	151.5	150.25	24.727		262.25	61.3	349.26	22.725	49.206	21.928	44.747		97.941	97.941	182.22	44.747	34.11	123.61	145.31	86.248	129.97	59.592
	132.2	32.015	49.398	35.451	191.9	157.51	21.219		297.45	60.103	386.24	14.397	39.013	20.409	43.875		119.82	119.82	205.72	43.875	34.072	113.85	140.93	107.29	146.03	50.6
	143.08	45.041	56.154	49.87	222.29	155.31	20.305		309.24	57.353	407.72	9.4194	36.332	19.404	43.143		142.27	142.27	237.13	43.143	33.574	112.6	135.17	119.2	153.63	44.111
	155.24	68.026	63.06	64.973	232.36	146.36	23.527		289.85	50.628	411.2	8.7545	45.24	18.576	42.662		169.78	169.78	289.08	42.662	33.241	123.71	126.53	120.24	148.81	39.432
	168.79	94.894	68.115	76.812	214.19	133.01	33.725		249.73	40.285	402.13	11.278	62.622	17.667	42.429		203.65	203.65	360.51	42.429	33.096	143.33	116.12	114.58	135.23	34.938
	182.59	119.57	71.55	81.438	174.65	117.59	49.872		200.54	29.956	384.28	15.547	82.358	17.183	42.274		237.14	237.14	432.46	42.274	33.165	165.66	106.22	104.85	118.87	31.669
	195.53	135.99	74.701	74.69	125.64	102.46	67.706		153.92	23.273	361.37	20.12	98.332	17.629	42.028		263.48	263.48	485.97	42.028	33.472	184.88	99.098	93.658	105.71	30.665
	206.47	142.26	77.219	59.202	79.027	85.393	82.966		121.54	23.868	337.16	23.552	104.42	19.512	41.523		275.94	275.94	502.07	41.523	34.202	195.22	97.036	83.62	101.72	32.965
	217.54	142.44	78.753	41.213	46.695	64.822	91.391		104.59	33.564	307.21	26.214	96.748	22.928	39.848		269.7	269.7	466.73	39.848	35.339	191.68	97.302	73.168	111.86	38.805
	229.5	139.34	78.952	26.964	30.744	44.081	90.412		95.304	49.942	269.03	29.068	79.382	27.539	37.117		249.26	249.26	392.6	37.117	36.605	178.15	98.378	60.56	132.17	47.492
	239.15	135.79	76.053	22.695	23.254	26.504	82.869		91.88	70.264	229.27	31.56	58.157	33.201	34.694		221.83	221.83	300.72	34.694	37.723	162.07	104.36	48.146	155.18	58.672
	243.3	134.62	70.288	31.456	21.075	15.422	72.617		92.516	91.792	194.57	33.133	38.904	39.77	33.941		194.65	194.65	212.13	33.941	38.415	150.91	119.35	38.276	173.42	71.99
	238.78	137.06	64.304	49.085	21.057	13.121	63.511		95.408	111.79	171.58	33.233	27.454	47.102	36.222		174.92	174.92	147.87	36.222	38.643	152.1	147.44	33.303	179.43	87.092
	219.59	141.24	60.748	71.011	20.05	17.378	59.404		98.133	132.71	161.99	30.914	25.6	57.531	42.864		162.36	162.36	108.98	42.864	38.592	172.43	200.36	35.627	169.5	108.49
	187.85	145.28	62.265	92.659	17.802	24.768	62.699		101.89	156.39	161.37	26.546	29.456	71.154	52.956		152.15	152.15	81.428	52.956	38.319	206.92	275.39	43.682	148.59	136.42
	152.56	147.35	71.373	109.46	16.414	31.862	70.828		110.32	179.13	167.18	21.548	36.33	84.468	64.511		144.73	144.73	63.663	64.511	37.881	245.41	354.92	53.865	122.28	164.11
	122.68	145.57	86.308	121.86	16.263	35.236	80.185		127.06	197.25	176.88	17.34	43.531	93.974	75.538		140.54	140.54	54.125	75.538	37.337	277.78	421.36	62.57	96.178	184.8
	107.19	137.48	103.29	132.91	17.725	33.91	87.167		155.74	207.06	187.92	15.34	48.369	96.172	84.049		140.03	140.03	51.256	84.049	36.507	293.85	457.09	66.193	75.852	191.72
	111.82	124.3	118.55	141.93	21.177	30.169	88.17		207.5	207.4	202.57	16.018	51.233	87.811	90.436		146.53	146.53	59.574	90.436	35.351	285.25	454.22	61.841	59.864	179.6
	89.159	171.91	77.634	111.36	154.8	118.57	103.09		91.405	86.679	318.91	61.504	146.75	23.43	55.679		165.18	165.18	74.291	55.679	26.929	106.64	175.36	104.64	161.64	65.369
	116.64	151.52	68.421	120.62	116.63	129.21	114.7		92.88	65.72	329.06	58.861	140.63	25.358	59.52		158.91	158.91	54.149	59.52	28.859	110.19	173.33	113.66	182.41	59.282
	132.28	142.8	61.027	129.86	81.35	141.26	122.55		114.19	52.139	335.08	55.978	132.98	26.501	62.821		160.33	160.33	45.715	62.821	34.74	110.53	170.96	120.72	192.88	53.865
	133.12	140.44	55.223	139.02	53.956	155.03	124		168.78	47.974	337.41	52.043	122.62	26.602	65.974		176.25	176.25	53.667	65.974	44.333	107.69	166.2	126.64	189.76	48.64
	124.64	141.28	50.78	148.03	35.206	167.15	115.91		250.96	50.177	336.88	46.998	109.28	25.993	69.343		205.49	205.49	73.61	69.343	55.286	104.67	158.02	132.22	177.47	42.713
	111.3	142.13	47.614	156.84	21.776	174.24	100.07		340.57	55.691	332.82	42.057	94.723	25.062	72.343		237.85	237.85	98.529	72.343	65.248	101.44	149.49	136.22	160.97	36.797
	97.553	139.82	45.876	168.8	12.523	172.91	81.147		417.44	61.455	324.53	38.435	80.711	24.193	74.39		263.17	263.17	121.41	74.39	71.87	97.965	143.7	137.42	145.17	31.609
	87.846	134.1	45.695	183.95	6.3051	158.37	63.827		461.43	64.413	311.33	37.349	69.011	23.773	74.896		271.25	271.25	135.24	74.896	74.751	94.194	143.74	134.59	135.03	27.864
	81.928	127.07	47.2	197.26	1.9799	132.88	52.788		464.37	64.223	288.17	40.096	58.802	23.969	73.364		256.91	256.91	136.87	73.364	75.459	88.365	153.22	126.06	132.27	25.168
	76.831	119.14	50.519	203.71	-0.21207	103.62	49.777		439.72	62.924	255.52	45.866	48.908	24.525	70.184		226.92	226.92	130.99	70.184	74.592	80.502	170.08	112.65	133.6	23.045
	72.936	110.68	57.825	198.27	0.49061	77.789	51.675		399.69	61.028	220.94	52.712	40.559	25.188	66.104		189.09	189.09	122.3	66.104	72.751	73.259	188.91	96.865	136.43	22.084
	70.619	102.09	69.032	174.73	3.7273	62.577	55.859		356.5	59.046	191.99	58.684	34.984	25.706	61.872		151.21	151.21	115.52	61.872	70.534	69.285	204.27	81.194	138.15	22.876
	70.26	93.063	80.881	136.43	9.1376	60.217	59.71		322.37	57.49	176.25	61.834	33.413	25.828	58.236		121.08	121.08	115.36	58.236	67.583	71.231	210.74	68.138	136.14	26.009
	71.563	83.349	90.113	92.709	16.361	65.915	60.605		293.39	56.117	175.94	61.871	38.528	25.434	55.02		96.396	96.396	123.64	55.02	63.499	82.517	204.94	55.84	127.61	33.465
	74.275	73.391	93.47	52.865	24.525	76.321	57.9		261.4	54.587	186.01	60.094	49.508	24.69	51.725		71.965	71.965	137.23	51.725	58.818	101.38	190.48	42.634	114.28	44.849
	78.84	63.636	88.232	26.215	33.869	88.084	53.343		232.28	53.263	203.13	56.94	62.331	23.778	48.616		51.233	51.233	153.38	48.616	54.081	122.68	172.44	31.307	100.38	57.192
	85.704	54.53	76.571	14.383	45.704	97.854	47.9		211.93	52.509	223.97	52.846	72.978	22.879	45.955		37.65	37.65	169.35	45.955	49.825	141.29	155.9	24.646	90.112	67.524
	95.311	44.404	62.567	11.161	61.336	107.07	42.538		206.22	52.69	245.23	48.249	77.425	22.176	44.005		34.663	34.663	182.42	44.005	45.944	152.09	145.92	25.437	87.699	72.875
	110.87	32.96	50.3	14.112	82.074	117.98	38.224		225.1	54.799	271.4	42.127	72.535	21.766	43.035		45.227	45.227	189.11	43.035	42.077	151.58	144.93	38.1	96.893	71.802
	132.09	22.703	43.852	20.8	115.73	128.4	33.809		264.62	58.59	304.72	34.189	60.989	21.53	42.867		67.04	67.04	191.26	42.867	38.387	143.17	149.56	60.777	114.88	66.285
	154.15	16.134	44.875	28.79	161.42	136.18	28.649		309.91	62.578	338.4	25.968	47.494	21.318	43.102		95.675	95.675	194.05	43.102	35.034	132.11	156.15	86.839	136.04	58.488
	172.24	15.758	50.647	41.512	207.44	139.14	24.466		346.05	65.275	365.66	18.996	36.759	20.98	43.339		126.7	126.7	202.68	43.339	32.18	123.66	161.09	109.66	154.73	50.579
	181.53	23.982	58.691	60.59	242.08	136.44	22.982		358.16	65.191	379.72	14.804	33.493	20.369	43.18		155.7	155.7	222.35	43.18	29.816	123.07	160.73	122.61	165.33	44.722
	176.62	39.137	66.529	80.879	253.64	129.53	25.921		338.27	60.041	377.61	14.139	41.185	18.811	42.596		186.31	186.31	263.74	42.596	27.837	134.09	151.51	123.75	165.17	40.249
	160.71	57.612	71.683	97.233	233.05	119.67	36.244		296.29	50.817	363.87	15.978	56.696	16.408	41.854		221.48	221.48	323.39	41.854	26.252	153.23	135.85	117.52	157.99	35.715
	141.93	75.796	73.872	104.51	188.14	108.14	52.802		244.2	40.948	342.92	19.204	74.792	14.165	40.995		255.74	255.74	385.27	40.995	25.073	174.84	119.1	106.8	147.81	32.125
	128.4	90.078	74.75	98.313	132.47	96.204	71.153		193.95	33.864	319.22	22.701	90.238	13.09	40.061		283.64	283.64	433.34	40.061	24.311	193.29	106.62	94.481	138.65	30.483
	128.24	99.92	74.736	82.079	79.604	82.018	86.854		157.52	32.995	297.2	25.35	97.8	14.189	39.093		299.69	299.69	451.56	39.093	23.821	202.93	103.77	83.46	134.51	31.792
	149.83	107.73	74.246	62.391	43.108	64.732	95.462		135.23	39.628	274.11	27.554	94.726	18.054	36.868		300.94	300.94	430.64	36.868	23.593	199.61	108.23	71.969	137.87	36.231
	187.77	114.31	73.7	45.832	25.136	47.121	94.331		119.13	51.475	246.99	30.057	84.507	24.012	33.358		291.02	291.02	381.27	33.358	23.849	187.1	116.45	58.079	146.05	43.13
	229.47	120.48	72.055	38.986	16.642	31.957	86.422		108.69	66.607	219.98	32.258	71.269	31.179	30.398		274.4	274.4	317.39	30.398	24.807	171.61	131.88	44.441	155.35	52.223
	262.36	127.03	69.034	44.659	14.4	22.011	75.705		103.38	83.095	197.2	33.554	59.137	38.669	29.824		255.53	255.53	252.95	29.824	26.686	159.35	157.98	33.705	162.05	63.242
	273.86	135.82	66.197	58.461	15.179	18.899	66.15		102.71	99.008	182.81	33.344	52.238	45.597	33.472		238.86	238.86	201.9	33.472	30.426	156.54	198.2	28.52	162.43	75.92
	255.58	146.32	65.109	76.185	15.75	20.77	61.726		106.01	116.66	178.89	30.467	51.775	53.329	43.8		221.95	221.95	161.39	43.8	35.879	168.18	268.14	31.56	154.49	93.765
	215.9	155.74	67.331	93.622	16.648	25.205	64.983		113.65	137.35	182.68	25.325	54.996	62.454	59.585		201.81	201.81	122.13	59.585	41.639	190.14	365.48	41.059	140.7	116.95
	167.42	161.3	74.427	106.57	20.027	29.786	73.275		126.57	157.58	191.05	19.658	60.099	70.926	77.139		182.14	182.14	88.375	77.139	46.296	214.89	466.86	53.005	124.07	140.23
	122.7	160.23	85.356	114.72	25.084	32.09	82.777		145.75	173.9	200.84	15.209	65.279	76.695	92.769		166.63	166.63	64.405	92.769	48.443	234.94	548.88	63.39	107.62	158.32
	94.338	148.03	97.772	120.88	31.015	31.722	89.666		172.16	182.82	208.93	13.719	68.734	77.715	102.79		158.95	158.95	54.483	102.79	46.848	242.76	588.18	68.204	94.339	165.97
	85.896	126.55	109.33	125.51	37.016	30.294	90.119		214.94	183.22	213.29	16.124	70.985	71.868	106.23		162.79	162.79	65.249	106.23	42.449	231.03	571.75	64.434	83.457	159.77
	51.298	90.309	61.227	33.118	131.65	164.59	25.094		213.04	56.335	362.64	10.902	53.919	21.838	42.021		162.98	162.98	177.31	42.021	37.477	98.936	106.92	92.958	137.86	45.345
	66.678	179.93	60.987	206.39	12.53	93.804	32.064		585.27	61.527	202.07	61.692	43.266	22.984	68.117		143.87	143.87	165.1	68.117	92.056	91.263	188.17	139.59	142.49	31.748
	66.439	213.59	66.917	193.6	19.868	65.744	36.947		522.24	60.232	161.82	71.963	40.156	21.694	63.895		118.9	118.9	176.27	63.895	101.79	69.968	233.03	121.88	137.47	31.06
	67.398	228.92	75.471	168.01	29.234	48.735	44.443		452.14	59.245	128.46	80.555	39.519	20.775	59.885		95.823	95.823	183.35	59.885	104.38	52.616	270.81	103.95	132.17	31.827
	69.53	220.33	84.27	131.02	39.08	44.438	51.205		393.23	58.898	111.69	84.387	40.719	20.593	56.86		79.631	79.631	184.61	56.86	96.8	46.58	289.66	88.9	125.94	34.734
	73.722	195.3	90.933	90.308	47.857	48	53.889		339.18	59.639	113.94	82.615	45.854	21.613	55.059		70.321	70.321	175.13	55.059	81.489	56.395	284.44	75.001	116.96	41.673
	79.991	162.21	93.083	53.538	54.467	56.935	51.39		277.83	61.246	128.73	77.292	55.348	23.59	53.97		64.563	64.563	156.06	53.97	62.98	77.145	263.04	60.164	105.65	52.185
	87.005	129.42	88.64	28.382	59.941	68.754	45.94		218.67	63.048	152.43	69.685	66.053	25.827	53.229		62.365	62.365	134.78	53.229	45.809	102.03	233.18	47.008	94.764	63.437
	93.437	105.3	79.192	16.756	65.929	80.969	39.193		171.17	64.372	181.4	61.06	74.824	27.628	52.475		63.731	63.731	118.68	52.475	34.511	124.25	202.58	38.152	87.024	72.591
	97.956	88.308	67.855	13.549	74.079	96.74	32.802		144.81	64.546	212.01	52.682	78.514	28.296	51.347		68.668	68.668	115.17	51.347	30.156	136.99	178.95	36.214	85.165	76.813
	97.166	72.861	57.745	15.882	86.043	117.72	28.421		150.03	63.658	250.03	43.314	74.344	27.357	49.632		78.016	78.016	124.77	49.632	29.722	136.51	162.39	45.018	92.886	74.497
	91.954	61.282	51.979	20.88	106.88	139.18	25.445		180.49	62.154	297.89	32.112	64.411	25.275	47.573		91.773	91.773	142.56	47.573	31.601	127.35	147.75	62.818	108.36	67.533
	87.414	55.897	51.369	25.665	135.48	156.38	22.771		220.57	59.906	346.92	20.933	52.886	22.761	45.485		108.68	108.68	167.73	45.485	34.188	115.13	134.89	83.88	126.05	58.33
	88.639	59.029	53.838	32.407	164.27	164.57	21.307		254.62	56.782	388.46	11.633	43.937	20.529	43.686		127.46	127.46	199.48	43.686	35.875	105.47	123.65	102.47	140.41	49.294
	100.72	76.211	58.167	43.024	185.66	161.8	21.961		267.01	52.652	413.86	6.0685	41.734	19.29	42.492		146.86	146.86	236.99	42.492	36.733	104.01	113.87	112.84	145.88	42.835
	131.2	105.89	63.136	54.261	192.05	151.22	25.64		250.75	45.014	421.17	5.3143	50.313	18.858	42.161		171.4	171.4	293.63	42.161	37.832	114.23	105.22	113.4	137.55	38.215
	176.68	139.78	67.524	62.865	177.42	135.78	34.639		216.26	33.954	416.16	8.1327	66.892	18.758	42.483		201.9	201.9	369.93	42.483	39.068	132.38	97.814	107.94	119.11	33.828
	225.85	169.56	72.289	65.581	146.84	118.41	48.351		174.03	23.227	401.76	12.912	85.421	19.269	43.07		231.61	231.61	445.86	43.07	40.336	153.23	92.138	98.915	97.954	30.78
	267.41	186.96	78.243	58.56	109.33	102.05	63.337		134.53	16.585	380.86	18.04	99.849	20.67	43.534		253.76	253.76	501.37	43.534	41.534	171.55	88.694	88.734	81.457	30.177
	290.07	188.73	83.953	43.97	73.938	84.565	76.157		108.25	17.782	356.38	21.905	104.13	23.242	43.489		261.59	261.59	516.41	43.489	43.022	182.11	87.982	79.826	77.004	33.124
	288.93	180.43	87.982	27.587	49.699	64.013	83.372		96.661	28.924	322.71	24.866	93.995	26.973	42.217		249.17	249.17	474.69	42.217	44.872	179.98	87.52	70.985	91.204	40.008
	271.54	166.87	88.895	15.186	38.758	43.568	82.799		92.777	47.51	277.91	27.998	73.487	31.679	39.978		221	221	389.58	39.978	46.538	168.63	86.975	60.594	119.13	50.094
	245.22	152.89	83.925	12.542	35.09	26.409	76.73		94.383	70.378	230.4	30.762	48.991	37.373	37.845		185.99	185.99	285.51	37.845	47.477	155.48	90.07	50.463	150.88	62.798
	217.27	143.32	74.027	22.624	35.477	15.713	68.441		99.264	94.368	188.57	32.62	26.894	44.069	36.894		153.03	153.03	186.91	36.894	47.144	147.93	100.53	42.399	176.54	77.539
	195.02	138.67	63.354	41.582	36.701	13.915	61.205		105.2	116.32	160.86	33.033	13.584	51.778	38.198		131.02	131.02	118.21	38.198	44.853	153.39	122.07	38.212	186.19	93.736
	175.29	135.74	56.061	64.963	35.543	18.897	58.297		109.21	138.74	148.72	31.216	11.065	63.158	42.143		121.21	121.21	83.057	42.143	40.969	179.57	163.55	39.912	174.84	116.16
	110.99	115.43	47.092	180.38	26.547	183.26	109.27		267.78	52.487	302.12	57.068	116.54	25.96	73.316		181.07	181.07	69.011	73.316	51.506	83.607	157.65	141.81	183.46	40.904
	99.093	111.95	45.219	187.95	14.634	189.59	92.23		395.2	56.082	302.82	50.84	96.619	25.543	75.369		200.23	200.23	93.432	75.369	57.26	96.205	142.27	149.04	168.58	36.879
	87.154	112.07	45.622	195.56	7.5915	186.12	72.211		504.69	60.325	298.8	46.185	77.933	25.065	76.544		214.9	214.9	117.1	76.544	62.647	106.22	131.82	152.87	153.95	33.601
	78.961	119.31	47.794	203.57	3.7808	167.19	54.127		567.03	62.251	287.33	44.96	63.495	24.622	76.218		217.17	217.17	133.76	76.218	68.851	109.57	132.57	151.69	143.65	31.15
	74.419	133.35	51.231	208.63	1.5651	135.41	42.888		571.05	61.572	262.3	49	53.054	24.112	73.767		202.88	202.88	142.76	73.767	76.251	102.3	150.9	143.61	138.77	29.088
	71.005	148.88	55.426	207.41	1.4927	99.252	40.515		536.21	60.266	225.51	57.068	44.601	23.47	69.606		177.29	177.29	148.27	69.606	83.07	87.126	182.67	129.7	136.62	27.359
	68.861	160.63	62.137	196.54	4.6552	67.204	43.734		479.28	58.764	186.14	66.411	38.514	22.85	64.671		146.65	146.65	151.27	64.671	87.527	69.989	218.26	112.8	135.52	26.624
	68.128	163.3	71.702	170.15	10.23	47.753	49.513		417.06	57.494	153.38	74.275	35.17	22.407	59.9		117.21	117.21	152.73	59.9	87.845	56.812	248.04	95.758	133.79	27.542
	68.95	153.97	81.483	130.47	17.394	43.045	54.823		366.33	56.887	136.41	77.907	34.945	22.297	56.229		95.2	95.2	153.62	56.229	82.144	53.526	262.4	81.41	129.77	30.773
	71.57	136.17	88.843	86.321	25.325	47.421	56.631		321.91	57.214	137.66	76.584	40.346	22.766	53.799		79.904	79.904	151.8	53.799	71.611	64.515	256.72	67.864	121.2	38.339
	75.893	114.29	91.145	46.528	33.049	57.665	54.13		272.64	58.19	151	72.139	51.121	23.712	51.985		67.156	67.156	146.61	51.985	59.063	85.827	237.41	53.227	109.2	49.8
	81.554	92.689	85.938	19.912	41.115	70.561	49.341		226.24	59.405	172.79	65.661	63.511	24.764	50.577		58.046	58.046	141.29	50.577	47.318	110.88	211.41	40.338	97.143	62.123
	88.185	75.764	74.982	8.5903	50.983	82.891	43.475		190.44	60.452	199.4	58.236	73.757	25.55	49.363		53.663	53.663	139.07	49.363	39.192	133.11	185.63	32.035	88.393	72.274
	95.418	61.848	61.95	6.6815	64.114	97.362	37.743		172.99	60.923	227.16	50.954	78.1	25.702	48.133		55.098	55.098	143.17	48.133	35.309	145.91	167.02	31.156	86.318	77.221
	103.34	48.021	50.516	11.009	81.969	116.12	33.356		184.33	61.175	261.54	42.69	73.424	24.961	46.883		63.642	63.642	152.55	46.883	33.793	145.44	156.68	41.892	94.6	75.339
	112.2	36.777	44.352	18.396	111.42	135.1	29.287		219.31	61.479	304.97	32.718	62.234	23.574	45.752		78.569	78.569	165.03	45.752	33.705	136.07	150.01	62.352	110.99	68.651
	121.86	30.61	44.796	25.666	151.5	150.25	24.727		262.25	61.3	349.26	22.725	49.206	21.928	44.747		97.941	97.941	182.22	44.747	34.11	123.61	145.31	86.248	129.97	59.592
	132.2	32.015	49.398	35.451	191.9	157.51	21.219		297.45	60.103	386.24	14.397	39.013	20.409	43.875		119.82	119.82	205.72	43.875	34.072	113.85	140.93	107.29	146.03	50.6
	143.08	45.041	56.154	49.87	222.29	155.31	20.305		309.24	57.353	407.72	9.4194	36.332	19.404	43.143		142.27	142.27	237.13	43.143	33.574	112.6	135.17	119.2	153.63	44.111
	155.24	68.026	63.06	64.973	232.36	146.36	23.527		289.85	50.628	411.2	8.7545	45.24	18.576	42.662		169.78	169.78	289.08	42.662	33.241	123.71	126.53	120.24	148.81	39.432
	168.79	94.894	68.115	76.812	214.19	133.01	33.725		249.73	40.285	402.13	11.278	62.622	17.667	42.429		203.65	203.65	360.51	42.429	33.096	143.33	116.12	114.58	135.23	34.938
	182.59	119.57	71.55	81.438	174.65	117.59	49.872		200.54	29.956	384.28	15.547	82.358	17.183	42.274		237.14	237.14	432.46	42.274	33.165	165.66	106.22	104.85	118.87	31.669
	195.53	135.99	74.701	74.69	125.64	102.46	67.706		153.92	23.273	361.37	20.12	98.332	17.629	42.028		263.48	263.48	485.97	42.028	33.472	184.88	99.098	93.658	105.71	30.665
	206.47	142.26	77.219	59.202	79.027	85.393	82.966		121.54	23.868	337.16	23.552	104.42	19.512	41.523		275.94	275.94	502.07	41.523	34.202	195.22	97.036	83.62	101.72	32.965
	217.54	142.44	78.753	41.213	46.695	64.822	91.391		104.59	33.564	307.21	26.214	96.748	22.928	39.848		269.7	269.7	466.73	39.848	35.339	191.68	97.302	73.168	111.86	38.805
	229.5	139.34	78.952	26.964	30.744	44.081	90.412		95.304	49.942	269.03	29.068	79.382	27.539	37.117		249.26	249.26	392.6	37.117	36.605	178.15	98.378	60.56	132.17	47.492
	239.15	135.79	76.053	22.695	23.254	26.504	82.869		91.88	70.264	229.27	31.56	58.157	33.201	34.694		221.83	221.83	300.72	34.694	37.723	162.07	104.36	48.146	155.18	58.672
	243.3	134.62	70.288	31.456	21.075	15.422	72.617		92.516	91.792	194.57	33.133	38.904	39.77	33.941		194.65	194.65	212.13	33.941	38.415	150.91	119.35	38.276	173.42	71.99
	238.78	137.06	64.304	49.085	21.057	13.121	63.511		95.408	111.79	171.58	33.233	27.454	47.102	36.222		174.92	174.92	147.87	36.222	38.643	152.1	147.44	33.303	179.43	87.092
	219.59	141.24	60.748	71.011	20.05	17.378	59.404		98.133	132.71	161.99	30.914	25.6	57.531	42.864		162.36	162.36	108.98	42.864	38.592	172.43	200.36	35.627	169.5	108.49
	187.85	145.28	62.265	92.659	17.802	24.768	62.699		101.89	156.39	161.37	26.546	29.456	71.154	52.956		152.15	152.15	81.428	52.956	38.319	206.92	275.39	43.682	148.59	136.42
	152.56	147.35	71.373	109.46	16.414	31.862	70.828		110.32	179.13	167.18	21.548	36.33	84.468	64.511		144.73	144.73	63.663	64.511	37.881	245.41	354.92	53.865	122.28	164.11
	122.68	145.57	86.308	121.86	16.263	35.236	80.185		127.06	197.25	176.88	17.34	43.531	93.974	75.538		140.54	140.54	54.125	75.538	37.337	277.78	421.36	62.57	96.178	184.8
	107.19	137.48	103.29	132.91	17.725	33.91	87.167		155.74	207.06	187.92	15.34	48.369	96.172	84.049		140.03	140.03	51.256	84.049	36.507	293.85	457.09	66.193	75.852	191.72
	111.82	124.3	118.55	141.93	21.177	30.169	88.17		207.5	207.4	202.57	16.018	51.233	87.811	90.436		146.53	146.53	59.574	90.436	35.351	285.25	454.22	61.841	59.864	179.6
	89.159	171.91	77.634	111.36	154.8	118.57	103.09		91.405	86.679	318.91	61.504	146.75	23.43	55.679		165.18	165.18	74.291	55.679	26.929	106.64	175.36	104.64	161.64	65.369
	116.64	151.52	68.421	120.62	116.63	129.21	114.7		92.88	65.72	329.06	58.861	140.63	25.358	59.52		158.91	158.91	54.149	59.52	28.859	110.19	173.33	113.66	182.41	59.282
	132.28	142.8	61.027	129.86	81.35	141.26	122.55		114.19	52.139	335.08	55.978	132.98	26.501	62.821		160.33	160.33	45.715	62.821	34.74	110.53	170.96	120.72	192.88	53.865
	133.12	140.44	55.223	139.02	53.956	155.03	124		168.78	47.974	337.41	52.043	122.62	26.602	65.974		176.25	176.25	53.667	65.974	44.333	107.69	166.2	126.64	189.76	48.64
	124.64	141.28	50.78	148.03	35.206	167.15	115.91		250.96	50.177	336.88	46.998	109.28	25.993	69.343		205.49	205.49	73.61	69.343	55.286	104.67	158.02	132.22	177.47	42.713
	111.3	142.13	47.614	156.84	21.776	174.24	100.07		340.57	55.691	332.82	42.057	94.723	25.062	72.343		237.85	237.85	98.529	72.343	65.248	101.44	149.49	136.22	160.97	36.797
	97.553	139.82	45.876	168.8	12.523	172.91	81.147		417.44	61.455	324.53	38.435	80.711	24.193	74.39		263.17	263.17	121.41	74.39	71.87	97.965	143.7	137.42	145.17	31.609
	87.846	134.1	45.695	183.95	6.3051	158.37	63.827		461.43	64.413	311.33	37.349	69.011	23.773	74.896		271.25	271.25	135.24	74.896	74.751	94.194	143.74	134.59	135.03	27.864
	81.928	127.07	47.2	197.26	1.9799	132.88	52.788		464.37	64.223	288.17	40.096	58.802	23.969	73.364		256.91	256.91	136.87	73.364	75.459	88.365	153.22	126.06	132.27	25.168
	76.831	119.14	50.519	203.71	-0.21207	103.62	49.777		439.72	62.924	255.52	45.866	48.908	24.525	70.184		226.92	226.92	130.99	70.184	74.592	80.502	170.08	112.65	133.6	23.045
	72.936	110.68	57.825	198.27	0.49061	77.789	51.675		399.69	61.028	220.94	52.712	40.559	25.188	66.104		189.09	189.09	122.3	66.104	72.751	73.259	188.91	96.865	136.43	22.084
	70.619	102.09	69.032	174.73	3.7273	62.577	55.859		356.5	59.046	191.99	58.684	34.984	25.706	61.872		151.21	151.21	115.52	61.872	70.534	69.285	204.27	81.194	138.15	22.876
	70.26	93.063	80.881	136.43	9.1376	60.217	59.71		322.37	57.49	176.25	61.834	33.413	25.828	58.236		121.08	121.08	115.36	58.236	67.583	71.231	210.74	68.138	136.14	26.009
	71.563	83.349	90.113	92.709	16.361	65.915	60.605		293.39	56.117	175.94	61.871	38.528	25.434	55.02		96.396	96.396	123.64	55.02	63.499	82.517	204.94	55.84	127.61	33.465
	74.275	73.391	93.47	52.865	24.525	76.321	57.9		261.4	54.587	186.01	60.094	49.508	24.69	51.725		71.965	71.965	137.23	51.725	58.818	101.38	190.48	42.634	114.28	44.849
	78.84	63.636	88.232	26.215	33.869	88.084	53.343		232.28	53.263	203.13	56.94	62.331	23.778	48.616		51.233	51.233	153.38	48.616	54.081	122.68	172.44	31.307	100.38	57.192
	85.704	54.53	76.571	14.383	45.704	97.854	47.9		211.93	52.509	223.97	52.846	72.978	22.879	45.955		37.65	37.65	169.35	45.955	49.825	141.29	155.9	24.646	90.112	67.524
	95.311	44.404	62.567	11.161	61.336	107.07	42.538		206.22	52.69	245.23	48.249	77.425	22.176	44.005		34.663	34.663	182.42	44.005	45.944	152.09	145.92	25.437	87.699	72.875
	110.87	32.96	50.3	14.112	82.074	117.98	38.224		225.1	54.799	271.4	42.127	72.535	21.766	43.035		45.227	45.227	189.11	43.035	42.077	151.58	144.93	38.1	96.893	71.802
	132.09	22.703	43.852	20.8	115.73	128.4	33.809		264.62	58.59	304.72	34.189	60.989	21.53	42.867		67.04	67.04	191.26	42.867	38.387	143.17	149.56	60.777	114.88	66.285
	154.15	16.134	44.875	28.79	161.42	136.18	28.649		309.91	62.578	338.4	25.968	47.494	21.318	43.102		95.675	95.675	194.05	43.102	35.034	132.11	156.15	86.839	136.04	58.488
	172.24	15.758	50.647	41.512	207.44	139.14	24.466		346.05	65.275	365.66	18.996	36.759	20.98	43.339		126.7	126.7	202.68	43.339	32.18	123.66	161.09	109.66	154.73	50.579
	181.53	23.982	58.691	60.59	242.08	136.44	22.982		358.16	65.191	379.72	14.804	33.493	20.369	43.18		155.7	155.7	222.35	43.18	29.816	123.07	160.73	122.61	165.33	44.722
	176.62	39.137	66.529	80.879	253.64	129.53	25.921		338.27	60.041	377.61	14.139	41.185	18.811	42.596		186.31	186.31	263.74	42.596	27.837	134.09	151.51	123.75	165.17	40.249
	160.71	57.612	71.683	97.233	233.05	119.67	36.244		296.29	50.817	363.87	15.978	56.696	16.408	41.854		221.48	221.48	323.39	41.854	26.252	153.23	135.85	117.52	157.99	35.715
	141.93	75.796	73.872	104.51	188.14	108.14	52.802		244.2	40.948	342.92	19.204	74.792	14.165	40.995		255.74	255.74	385.27	40.995	25.073	174.84	119.1	106.8	147.81	32.125
	128.4	90.078	74.75	98.313	132.47	96.204	71.153		193.95	33.864	319.22	22.701	90.238	13.09	40.061		283.64	283.64	433.34	40.061	24.311	193.29	106.62	94.481	138.65	30.483
	128.24	99.92	74.736	82.079	79.604	82.018	86.854		157.52	32.995	297.2	25.35	97.8	14.189	39.093		299.69	299.69	451.56	39.093	23.821	202.93	103.77	83.46	134.51	31.792
	149.83	107.73	74.246	62.391	43.108	64.732	95.462		135.23	39.628	274.11	27.554	94.726	18.054	36.868		300.94	300.94	430.64	36.868	23.593	199.61	108.23	71.969	137.87	36.231
	187.77	114.31	73.7	45.832	25.136	47.121	94.331		119.13	51.475	246.99	30.057	84.507	24.012	33.358		291.02	291.02	381.27	33.358	23.849	187.1	116.45	58.079	146.05	43.13
	229.47	120.48	72.055	38.986	16.642	31.957	86.422		108.69	66.607	219.98	32.258	71.269	31.179	30.398		274.4	274.4	317.39	30.398	24.807	171.61	131.88	44.441	155.35	52.223
	262.36	127.03	69.034	44.659	14.4	22.011	75.705		103.38	83.095	197.2	33.554	59.137	38.669	29.824		255.53	255.53	252.95	29.824	26.686	159.35	157.98	33.705	162.05	63.242
	273.86	135.82	66.197	58.461	15.179	18.899	66.15		102.71	99.008	182.81	33.344	52.238	45.597	33.472		238.86	238.86	201.9	33.472	30.426	156.54	198.2	28.52	162.43	75.92
	255.58	146.32	65.109	76.185	15.75	20.77	61.726		106.01	116.66	178.89	30.467	51.775	53.329	43.8		221.95	221.95	161.39	43.8	35.879	168.18	268.14	31.56	154.49	93.765
	215.9	155.74	67.331	93.622	16.648	25.205	64.983		113.65	137.35	182.68	25.325	54.996	62.454	59.585		201.81	201.81	122.13	59.585	41.639	190.14	365.48	41.059	140.7	116.95
	167.42	161.3	74.427	106.57	20.027	29.786	73.275		126.57	157.58	191.05	19.658	60.099	70.926	77.139		182.14	182.14	88.375	77.139	46.296	214.89	466.86	53.005	124.07	140.23
	122.7	160.23	85.356	114.72	25.084	32.09	82.777		145.75	173.9	200.84	15.209	65.279	76.695	92.769		166.63	166.63	64.405	92.769	48.443	234.94	548.88	63.39	107.62	158.32
	94.338	148.03	97.772	120.88	31.015	31.722	89.666		172.16	182.82	208.93	13.719	68.734	77.715	102.79		158.95	158.95	54.483	102.79	46.848	242.76	588.18	68.204	94.339	165.97
	85.896	126.55	109.33	125.51	37.016	30.294	90.119		214.94	183.22	213.29	16.124	70.985	71.868	106.23		162.79	162.79	65.249	106.23	42.449	231.03	571.75	64.434	83.457	159.77
	51.298	90.309	61.227	33.118	131.65	164.59	25.094		213.04	56.335	362.64	10.902	53.919	21.838	42.021		162.98	162.98	177.31	42.021	37.477	98.936	106.92	92.958	137.86	45.345
	66.678	179.93	60.987	206.39	12.53	93.804	32.064		585.27	61.527	202.07	61.692	43.266	22.984	68.117		143.87	143.87	165.1	68.117	92.056	91.263	188.17	139.59	142.49	31.748
	66.439	213.59	66.917	193.6	19.868	65.744	36.947		522.24	60.232	161.82	71.963	40.156	21.694	63.895		118.9	118.9	176.27	63.895	101.79	69.968	233.03	121.88	137.47	31.06
	67.398	228.92	75.471	168.01	29.234	48.735	44.443		452.14	59.245	128.46	80.555	39.519	20.775	59.885		95.823	95.823	183.35	59.885	104.38	52.616	270.81	103.95	132.17	31.827
	69.53	220.33	84.27	131.02	39.08	44.438	51.205		393.23	58.898	111.69	84.387	40.719	20.593	56.86		79.631	79.631	184.61	56.86	96.8	46.58	289.66	88.9	125.94	34.734
	73.722	195.3	90.933	90.308	47.857	48	53.889		339.18	59.639	113.94	82.615	45.854	21.613	55.059		70.321	70.321	175.13	55.059	81.489	56.395	284.44	75.001	116.96	41.673
	79.991	162.21	93.083	53.538	54.467	56.935	51.39		277.83	61.246	128.73	77.292	55.348	23.59	53.97		64.563	64.563	156.06	53.97	62.98	77.145	263.04	60.164	105.65	52.185
	87.005	129.42	88.64	28.382	59.941	68.754	45.94		218.67	63.048	152.43	69.685	66.053	25.827	53.229		62.365	62.365	134.78	53.229	45.809	102.03	233.18	47.008	94.764	63.437
	93.437	105.3	79.192	16.756	65.929	80.969	39.193		171.17	64.372	181.4	61.06	74.824	27.628	52.475		63.731	63.731	118.68	52.475	34.511	124.25	202.58	38.152	87.024	72.591
	97.956	88.308	67.855	13.549	74.079	96.74	32.802		144.81	64.546	212.01	52.682	78.514	28.296	51.347		68.668	68.668	115.17	51.347	30.156	136.99	178.95	36.214	85.165	76.813
	97.166	72.861	57.745	15.882	86.043	117.72	28.421		150.03	63.658	250.03	43.314	74.344	27.357	49.632		78.016	78.016	124.77	49.632	29.722	136.51	162.39	45.018	92.886	74.497
	91.954	61.282	51.979	20.88	106.88	139.18	25.445		180.49	62.154	297.89	32.112	64.411	25.275	47.573		91.773	91.773	142.56	47.573	31.601	127.35	147.75	62.818	108.36	67.533
	87.414	55.897	51.369	25.665	135.48	156.38	22.771		220.57	59.906	346.92	20.933	52.886	22.761	45.485		108.68	108.68	167.73	45.485	34.188	115.13	134.89	83.88	126.05	58.33
	88.639	59.029	53.838	32.407	164.27	164.57	21.307		254.62	56.782	388.46	11.633	43.937	20.529	43.686		127.46	127.46	199.48	43.686	35.875	105.47	123.65	102.47	140.41	49.294
	100.72	76.211	58.167	43.024	185.66	161.8	21.961		267.01	52.652	413.86	6.0685	41.734	19.29	42.492		146.86	146.86	236.99	42.492	36.733	104.01	113.87	112.84	145.88	42.835
	131.2	105.89	63.136	54.261	192.05	151.22	25.64		250.75	45.014	421.17	5.3143	50.313	18.858	42.161		171.4	171.4	293.63	42.161	37.832	114.23	105.22	113.4	137.55	38.215
	176.68	139.78	67.524	62.865	177.42	135.78	34.639		216.26	33.954	416.16	8.1327	66.892	18.758	42.483		201.9	201.9	369.93	42.483	39.068	132.38	97.814	107.94	119.11	33.828
	225.85	169.56	72.289	65.581	146.84	118.41	48.351		174.03	23.227	401.76	12.912	85.421	19.269	43.07		231.61	231.61	445.86	43.07	40.336	153.23	92.138	98.915	97.954	30.78
	267.41	186.96	78.243	58.56	109.33	102.05	63.337		134.53	16.585	380.86	18.04	99.849	20.67	43.534		253.76	253.76	501.37	43.534	41.534	171.55	88.694	88.734	81.457	30.177
	290.07	188.73	83.953	43.97	73.938	84.565	76.157		108.25	17.782	356.38	21.905	104.13	23.242	43.489		261.59	261.59	516.41	43.489	43.022	182.11	87.982	79.826	77.004	33.124
	288.93	180.43	87.982	27.587	49.699	64.013	83.372		96.661	28.924	322.71	24.866	93.995	26.973	42.217		249.17	249.17	474.69	42.217	44.872	179.98	87.52	70.985	91.204	40.008
	271.54	166.87	88.895	15.186	38.758	43.568	82.799		92.777	47.51	277.91	27.998	73.487	31.679	39.978		221	221	389.58	39.978	46.538	168.63	86.975	60.594	119.13	50.094
	245.22	152.89	83.925	12.542	35.09	26.409	76.73		94.383	70.378	230.4	30.762	48.991	37.373	37.845		185.99	185.99	285.51	37.845	47.477	155.48	90.07	50.463	150.88	62.798
	217.27	143.32	74.027	22.624	35.477	15.713	68.441		99.264	94.368	188.57	32.62	26.894	44.069	36.894		153.03	153.03	186.91	36.894	47.144	147.93	100.53	42.399	176.54	77.539
	195.02	138.67	63.354	41.582	36.701	13.915	61.205		105.2	116.32	160.86	33.033	13.584	51.778	38.198		131.02	131.02	118.21	38.198	44.853	153.39	122.07	38.212	186.19	93.736
	175.29	135.74	56.061	64.963	35.543	18.897	58.297		109.21	138.74	148.72	31.216	11.065	63.158	42.143		121.21	121.21	83.057	42.143	40.969	179.57	163.55	39.912	174.84	116.16
	110.99	115.43	47.092	180.38	26.547	183.26	109.27		267.78	52.487	302.12	57.068	116.54	25.96	73.316		181.07	181.07	69.011	73.316	51.506	83.607	157.65	141.81	183.46	40.904
	99.093	111.95	45.219	187.95	14.634	189.59	92.23		395.2	56.082	302.82	50.84	96.619	25.543	75.369		200.23	200.23	93.432	75.369	57.26	96.205	142.27	149.04	168.58	36.879
	87.154	112.07	45.622	195.56	7.5915	186.12	72.211		504.69	60.325	298.8	46.185	77.933	25.065	76.544		214.9	214.9	117.1	76.544	62.647	106.22	131.82	152.87	153.95	33.601
	78.961	119.31	47.794	203.57	3.7808	167.19	54.127		567.03	62.251	287.33	44.96	63.495	24.622	76.218		217.17	217.17	133.76	76.218	68.851	109.57	132.57	151.69	143.65	31.15
	74.419	133.35	51.231	208.63	1.5651	135.41	42.888		571.05	61.572	262.3	49	53.054	24.112	73.767		202.88	202.88	142.76	73.767	76.251	102.3	150.9	143.61	138.77	29.088
	71.005	148.88	55.426	207.41	1.4927	99.252	40.515		536.21	60.266	225.51	57.068	44.601	23.47	69.606		177.29	177.29	148.27	69.606	83.07	87.126	182.67	129.7	136.62	27.359
	68.861	160.63	62.137	196.54	4.6552	67.204	43.734		479.28	58.764	186.14	66.411	38.514	22.85	64.671		146.65	146.65	151.27	64.671	87.527	69.989	218.26	112.8	135.52	26.624
	68.128	163.3	71.702	170.15	10.23	47.753	49.513		417.06	57.494	153.38	74.275	35.17	22.407	59.9		117.21	117.21	152.73	59.9	87.845	56.812	248.04	95.758	133.79	27.542
	68.95	153.97	81.483	130.47	17.394	43.045	54.823		366.33	56.887	136.41	77.907	34.945	22.297	56.229		95.2	95.2	153.62	56.229	82.144	53.526	262.4	81.41	129.77	30.773
	71.57	136.17	88.843	86.321	25.325	47.421	56.631		321.91	57.214	137.66	76.584	40.346	22.766	53.799		79.904	79.904	151.8	53.799	71.611	64.515	256.72	67.864	121.2	38.339
	75.893	114.29	91.145	46.528	33.049	57.665	54.13		272.64	58.19	151	72.139	51.121	23.712	51.985		67.156	67.156	146.61	51.985	59.063	85.827	237.41	53.227	109.2	49.8
	81.554	92.689	85.938	19.912	41.115	70.561	49.341		226.24	59.405	172.79	65.661	63.511	24.764	50.577		58.046	58.046	141.29	50.577	47.318	110.88	211.41	40.338	97.143	62.123
	88.185	75.764	74.982	8.5903	50.983	82.891	43.475		190.44	60.452	199.4	58.236	73.757	25.55	49.363		53.663	53.663	139.07	49.363	39.192	133.11	185.63	32.035	88.393	72.274
	95.418	61.848	61.95	6.6815	64.114	97.362	37.743		172.99	60.923	227.16	50.954	78.1	25.702	48.133		55.098	55.098	143.17	48.133	35.309	145.91	167.02	31.156	86.318	77.221
	103.34	48.021	50.516	11.009	81.969	116.12	33.356		184.33	61.175	261.54	42.69	73.424	24.961	46.883		63.642	63.642	152.55	46.883	33.793	145.44	156.68	41.892	94.6	75.339
	112.2	36.777	44.352	18.396	111.42	135.1	29.287		219.31	61.479	304.97	32.718	62.234	23.574	45.752		78.569	78.569	165.03	45.752	33.705	136.07	150.01	62.352	110.99	68.651
	121.86	30.61	44.796	25.666	151.5	150.25	24.727		262.25	61.3	349.26	22.725	49.206	21.928	44.747		97.941	97.941	182.22	44.747	34.11	123.61	145.31	86.248	129.97	59.592
	132.2	32.015	49.398	35.451	191.9	157.51	21.219		297.45	60.103	386.24	14.397	39.013	20.409	43.875		119.82	119.82	205.72	43.875	34.072	113.85	140.93	107.29	146.03	50.6
	143.08	45.041	56.154	49.87	222.29	155.31	20.305		309.24	57.353	407.72	9.4194	36.332	19.404	43.143		142.27	142.27	237.13	43.143	33.574	112.6	135.17	119.2	153.63	44.111
	155.24	68.026	63.06	64.973	232.36	146.36	23.527		289.85	50.628	411.2	8.7545	45.24	18.576	42.662		169.78	169.78	289.08	42.662	33.241	123.71	126.53	120.24	148.81	39.432
	168.79	94.894	68.115	76.812	214.19	133.01	33.725		249.73	40.285	402.13	11.278	62.622	17.667	42.429		203.65	203.65	360.51	42.429	33.096	143.33	116.12	114.58	135.23	34.938
	182.59	119.57	71.55	81.438	174.65	117.59	49.872		200.54	29.956	384.28	15.547	82.358	17.183	42.274		237.14	237.14	432.46	42.274	33.165	165.66	106.22	104.85	118.87	31.669
	195.53	135.99	74.701	74.69	125.64	102.46	67.706		153.92	23.273	361.37	20.12	98.332	17.629	42.028		263.48	263.48	485.97	42.028	33.472	184.88	99.098	93.658	105.71	30.665
	206.47	142.26	77.219	59.202	79.027	85.393	82.966		121.54	23.868	337.16	23.552	104.42	19.512	41.523		275.94	275.94	502.07	41.523	34.202	195.22	97.036	83.62	101.72	32.965
	217.54	142.44	78.753	41.213	46.695	64.822	91.391		104.59	33.564	307.21	26.214	96.748	22.928	39.848		269.7	269.7	466.73	39.848	35.339	191.68	97.302	73.168	111.86	38.805
	229.5	139.34	78.952	26.964	30.744	44.081	90.412		95.304	49.942	269.03	29.068	79.382	27.539	37.117		249.26	249.26	392.6	37.117	36.605	178.15	98.378	60.56	132.17	47.492
	239.15	135.79	76.053	22.695	23.254	26.504	82.869		91.88	70.264	229.27	31.56	58.157	33.201	34.694		221.83	221.83	300.72	34.694	37.723	162.07	104.36	48.146	155.18	58.672
	243.3	134.62	70.288	31.456	21.075	15.422	72.617		92.516	91.792	194.57	33.133	38.904	39.77	33.941		194.65	194.65	212.13	33.941	38.415	150.91	119.35	38.276	173.42	71.99
	238.78	137.06	64.304	49.085	21.057	13.121	63.511		95.408	111.79	171.58	33.233	27.454	47.102	36.222		174.92	174.92	147.87	36.222	38.643	152.1	147.44	33.303	179.43	87.092
	219.59	141.24	60.748	71.011	20.05	17.378	59.404		98.133	132.71	161.99	30.914	25.6	57.531	42.864		162.36	162.36	108.98	42.864	38.592	172.43	200.36	35.627	169.5	108.49
	187.85	145.28	62.265	92.659	17.802	24.768	62.699		101.89	156.39	161.37	26.546	29.456	71.154	52.956		152.15	152.15	81.428	52.956	38.319	206.92	275.39	43.682	148.59	136.42
	152.56	147.35	71.373	109.46	16.414	31.862	70.828		110.32	179.13	167.18	21.548	36.33	84.468	64.511		144.73	144.73	63.663	64.511	37.881	245.41	354.92	53.865	122.28	164.11
	122.68	145.57	86.308	121.86	16.263	35.236	80.185		127.06	197.25	176.88	17.34	43.531	93.974	75.538		140.54	140.54	54.125	75.538	37.337	277.78	421.36	62.57	96.178	184.8
	107.19	137.48	103.29	132.91	17.725	33.91	87.167		155.74	207.06	187.92	15.34	48.369	96.172	84.049		140.03	140.03	51.256	84.049	36.507	293.85	457.09	66.193	75.852	191.72
	111.82	124.3	118.55	141.93	21.177	30.169	88.17		207.5	207.4	202.57	16.018	51.233	87.811	90.436		146.53	146.53	59.574	90.436	35.351	285.25	454.22	61.841	59.864	179.6
	89.159	171.91	77.634	111.36	154.8	118.57	103.09		91.405	86.679	318.91	61.504	146.75	23.43	55.679		165.18	165.18	74.291	55.679	26.929	106.64	175.36	104.64	161.64	65.369
	116.64	151.52	68.421	120.62	116.63	129.21	114.7		92.88	65.72	329.06	58.861	140.63	25.358	59.52		158.91	158.91	54.149	59.52	28.859	110.19	173.33	113.66	182.41	59.282
	132.28	142.8	61.027	129.86	81.35	141.26	122.55		114.19	52.139	335.08	55.978	132.98	26.501	62.821		160.33	160.33	45.715	62.821	34.74	110.53	170.96	120.72	192.88	53.865
	133.12	140.44	55.223	139.02	53.956	155.03	124		168.78	47.974	337.41	52.043	122.62	26.602	65.974		176.25	176.25	53.667	65.974	44.333	107.69	166.2	126.64	189.76	48.64
	124.64	141.28	50.78	148.03	35.206	167.15	115.91		250.96	50.177	336.88	46.998	109.28	25.993	69.343		205.49	205.49	73.61	69.343	55.286	104.67	158.02	132.22	177.47	42.713
	111.3	142.13	47.614	156.84	21.776	174.24	100.07		340.57	55.691	332.82	42.057	94.723	25.062	72.343		237.85	237.85	98.529	72.343	65.248	101.44	149.49	136.22	160.97	36.797
	97.553	139.82	45.876	168.8	12.523	172.91	81.147		417.44	61.455	324.53	38.435	80.711	24.193	74.39		263.17	263.17	121.41	74.39	71.87	97.965	143.7	137.42	145.17	31.609
	87.846	134.1	45.695	183.95	6.3051	158.37	63.827		461.43	64.413	311.33	37.349	69.011	23.773	74.896		271.25	271.25	135.24	74.896	74.751	94.194	143.74	134.59	135.03	27.864
	81.928	127.07	47.2	197.26	1.9799	132.88	52.788		464.37	64.223	288.17	40.096	58.802	23.969	73.364		256.91	256.91	136.87	73.364	75.459	88.365	153.22	126.06	132.27	25.168
	76.831	119.14	50.519	203.71	-0.21207	103.62	49.777		439.72	62.924	255.52	45.866	48.908	24.525	70.184		226.92	226.92	130.99	70.184	74.592	80.502	170.08	112.65	133.6	23.045
	72.936	110.68	57.825	198.27	0.49061	77.789	51.675		399.69	61.028	220.94	52.712	40.559	25.188	66.104		189.09	189.09	122.3	66.104	72.751	73.259	188.91	96.865	136.43	22.084
	70.619	102.09	69.032	174.73	3.7273	62.577	55.859		356.5	59.046	191.99	58.684	34.984	25.706	61.872		151.21	151.21	115.52	61.872	70.534	69.285	204.27	81.194	138.15	22.876
	70.26	93.063	80.881	136.43	9.1376	60.217	59.71		322.37	57.49	176.25	61.834	33.413	25.828	58.236		121.08	121.08	115.36	58.236	67.583	71.231	210.74	68.138	136.14	26.009
	71.563	83.349	90.113	92.709	16.361	65.915	60.605		293.39	56.117	175.94	61.871	38.528	25.434	55.02		96.396	96.396	123.64	55.02	63.499	82.517	204.94	55.84	127.61	33.465
	74.275	73.391	93.47	52.865	24.525	76.321	57.9		261.4	54.587	186.01	60.094	49.508	24.69	51.725		71.965	71.965	137.23	51.725	58.818	101.38	190.48	42.634	114.28	44.849
	78.84	63.636	88.232	26.215	33.869	88.084	53.343		232.28	53.263	203.13	56.94	62.331	23.778	48.616		51.233	51.233	153.38	48.616	54.081	122.68	172.44	31.307	100.38	57.192
	85.704	54.53	76.571	14.383	45.704	97.854	47.9		211.93	52.509	223.97	52.846	72.978	22.879	45.955		37.65	37.65	169.35	45.955	49.825	141.29	155.9	24.646	90.112	67.524
	95.311	44.404	62.567	11.161	61.336	107.07	42.538		206.22	52.69	245.23	48.249	77.425	22.176	44.005		34.663	34.663	182.42	44.005	45.944	152.09	145.92	25.437	87.699	72.875
	110.87	32.96	50.3	14.112	82.074	117.98	38.224		225.1	54.799	271.4	42.127	72.535	21.766	43.035		45.227	45.227	189.11	43.035	42.077	151.58	144.93	38.1	96.893	71.802
	132.09	22.703	43.852	20.8	115.73	128.4	33.809		264.62	58.59	304.72	34.189	60.989	21.53	42.867		67.04	67.04	191.26	42.867	38.387	143.17	149.56	60.777	114.88	66.285
	154.15	16.134	44.875	28.79	161.42	136.18	28.649		309.91	62.578	338.4	25.968	47.494	21.318	43.102		95.675	95.675	194.05	43.102	35.034	132.11	156.15	86.839	136.04	58.488
	172.24	15.758	50.647	41.512	207.44	139.14	24.466		346.05	65.275	365.66	18.996	36.759	20.98	43.339		126.7	126.7	202.68	43.339	32.18	123.66	161.09	109.66	154.73	50.579
	181.53	23.982	58.691	60.59	242.08	136.44	22.982		358.16	65.191	379.72	14.804	33.493	20.369	43.18		155.7	155.7	222.35	43.18	29.816	123.07	160.73	122.61	165.33	44.722
	176.62	39.137	66.529	80.879	253.64	129.53	25.921		338.27	60.041	377.61	14.139	41.185	18.811	42.596		186.31	186.31	263.74	42.596	27.837	134.09	151.51	123.75	165.17	40.249
	160.71	57.612	71.683	97.233	233.05	119.67	36.244		296.29	50.817	363.87	15.978	56.696	16.408	41.854		221.48	221.48	323.39	41.854	26.252	153.23	135.85	117.52	157.99	35.715
	141.93	75.796	73.872	104.51	188.14	108.14	52.802		244.2	40.948	342.92	19.204	74.792	14.165	40.995		255.74	255.74	385.27	40.995	25.073	174.84	119.1	106.8	147.81	32.125
	128.4	90.078	74.75	98.313	132.47	96.204	71.153		193.95	33.864	319.22	22.701	90.238	13.09	40.061		283.64	283.64	433.34	40.061	24.311	193.29	106.62	94.481	138.65	30.483
	128.24	99.92	74.736	82.079	79.604	82.018	86.854		157.52	32.995	297.2	25.35	97.8	14.189	39.093		299.69	299.69	451.56	39.093	23.821	202.93	103.77	83.46	134.51	31.792
	149.83	107.73	74.246	62.391	43.108	64.732	95.462		135.23	39.628	274.11	27.554	94.726	18.054	36.868		300.94	300.94	430.64	36.868	23.593	199.61	108.23	71.969	137.87	36.231
	187.77	114.31	73.7	45.832	25.136	47.121	94.331		119.13	51.475	246.99	30.057	84.507	24.012	33.358		291.02	291.02	381.27	33.358	23.849	187.1	116.45	58.079	146.05	43.13
	229.47	120.48	72.055	38.986	16.642	31.957	86.422		108.69	66.607	219.98	32.258	71.269	31.179	30.398		274.4	274.4	317.39	30.398	24.807	171.61	131.88	44.441	155.35	52.223
	262.36	127.03	69.034	44.659	14.4	22.011	75.705		103.38	83.095	197.2	33.554	59.137	38.669	29.824		255.53	255.53	252.95	29.824	26.686	159.35	157.98	33.705	162.05	63.242
	273.86	135.82	66.197	58.461	15.179	18.899	66.15		102.71	99.008	182.81	33.344	52.238	45.597	33.472		238.86	238.86	201.9	33.472	30.426	156.54	198.2	28.52	162.43	75.92
	255.58	146.32	65.109	76.185	15.75	20.77	61.726		106.01	116.66	178.89	30.467	51.775	53.329	43.8		221.95	221.95	161.39	43.8	35.879	168.18	268.14	31.56	154.49	93.765
	215.9	155.74	67.331	93.622	16.648	25.205	64.983		113.65	137.35	182.68	25.325	54.996	62.454	59.585		201.81	201.81	122.13	59.585	41.639	190.14	365.48	41.059	140.7	116.95
	167.42	161.3	74.427	106.57	20.027	29.786	73.275		126.57	157.58	191.05	19.658	60.099	70.926	77.139		182.14	182.14	88.375	77.139	46.296	214.89	466.86	53.005	124.07	140.23
	122.7	160.23	85.356	114.72	25.084	32.09	82.777		145.75	173.9	200.84	15.209	65.279	76.695	92.769		166.63	166.63	64.405	92.769	48.443	234.94	548.88	63.39	107.62	158.32
	94.338	148.03	97.772	120.88	31.015	31.722	89.666		172.16	182.82	208.93	13.719	68.734	77.715	102.79		158.95	158.95	54.483	102.79	46.848	242.76	588.18	68.204	94.339	165.97
	85.896	126.55	109.33	125.51	37.016	30.294	90.119		214.94	183.22	213.29	16.124	70.985	71.868	106.23		162.79	162.79	65.249	106.23	42.449	231.03	571.75	64.434	83.457	159.77
	51.298	90.309	61.227	33.118	131.65	164.59	25.094		213.04	56.335	362.64	10.902	53.919	21.838	42.021		162.98	162.98	177.31	42.021	37.477	98.936	106.92	92.958	137.86	45.345
	66.678	179.93	60.987	206.39	12.53	93.804	32.064		585.27	61.527	202.07	61.692	43.266	22.984	68.117		143.87	143.87	165.1	68.117	92.056	91.263	188.17	139.59	142.49	31.748
	66.439	213.59	66.917	193.6	19.868	65.744	36.947		522.24	60.232	161.82	71.963	40.156	21.694	63.895		118.9	118.9	176.27	63.895	101.79	69.968	233.03	121.88	137.47	31.06
	67.398	228.92	75.471	168.01	29.234	48.735	44.443		452.14	59.245	128.46	80.555	39.519	20.775	59.885		95.823	95.823	183.35	59.885	104.38	52.616	270.81	103.95	132.17	31.827
	69.53	220.33	84.27	131.02	39.08	44.438	51.205		393.23	58.898	111.69	84.387	40.719	20.593	56.86		79.631	79.631	184.61	56.86	96.8	46.58	289.66	88.9	125.94	34.734
	73.722	195.3	90.933	90.308	47.857	48	53.889		339.18	59.639	113.94	82.615	45.854	21.613	55.059		70.321	70.321	175.13	55.059	81.489	56.395	284.44	75.001	116.96	41.673
	79.991	162.21	93.083	53.538	54.467	56.935	51.39		277.83	61.246	128.73	77.292	55.348	23.59	53.97		64.563	64.563	156.06	53.97	62.98	77.145	263.04	60.164	105.65	52.185
	87.005	129.42	88.64	28.382	59.941	68.754	45.94		218.67	63.048	152.43	69.685	66.053	25.827	53.229		62.365	62.365	134.78	53.229	45.809	102.03	233.18	47.008	94.764	63.437
	93.437	105.3	79.192	16.756	65.929	80.969	39.193		171.17	64.372	181.4	61.06	74.824	27.628	52.475		63.731	63.731	118.68	52.475	34.511	124.25	202.58	38.152	87.024	72.591
	97.956	88.308	67.855	13.549	74.079	96.74	32.802		144.81	64.546	212.01	52.682	78.514	28.296	51.347		68.668	68.668	115.17	51.347	30.156	136.99	178.95	36.214	85.165	76.813
	97.166	72.861	57.745	15.882	86.043	117.72	28.421		150.03	63.658	250.03	43.314	74.344	27.357	49.632		78.016	78.016	124.77	49.632	29.722	136.51	162.39	45.018	92.886	74.497
	91.954	61.282	51.979	20.88	106.88	139.18	25.445		180.49	62.154	297.89	32.112	64.411	25.275	47.573		91.773	91.773	142.56	47.573	31.601	127.35	147.75	62.818	108.36	67.533
	87.414	55.897	51.369	25.665	135.48	156.38	22.771		220.57	59.906	346.92	20.933	52.886	22.761	45.485		108.68	108.68	167.73	45.485	34.188	115.13	134.89	83.88	126.05	58.33
	88.639	59.029	53.838	32.407	164.27	164.57	21.307		254.62	56.782	388.46	11.633	43.937	20.529	43.686		127.46	127.46	199.48	43.686	35.875	105.47	123.65	102.47	140.41	49.294
	100.72	76.211	58.167	43.024	185.66	161.8	21.961		267.01	52.652	413.86	6.0685	41.734	19.29	42.492		146.86	146.86	236.99	42.492	36.733	104.01	113.87	112.84	145.88	42.835
	131.2	105.89	63.136	54.261	192.05	151.22	25.64		250.75	45.014	421.17	5.3143	50.313	18.858	42.161		171.4	171.4	293.63	42.161	37.832	114.23	105.22	113.4	137.55	38.215
	176.68	139.78	67.524	62.865	177.42	135.78	34.639		216.26	33.954	416.16	8.1327	66.892	18.758	42.483		201.9	201.9	369.93	42.483	39.068	132.38	97.814	107.94	119.11	33.828
	225.85	169.56	72.289	65.581	146.84	118.41	48.351		174.03	23.227	401.76	12.912	85.421	19.269	43.07		231.61	231.61	445.86	43.07	40.336	153.23	92.138	98.915	97.954	30.78
	267.41	186.96	78.243	58.56	109.33	102.05	63.337		134.53	16.585	380.86	18.04	99.849	20.67	43.534		253.76	253.76	501.37	43.534	41.534	171.55	88.694	88.734	81.457	30.177
	290.07	188.73	83.953	43.97	73.938	84.565	76.157		108.25	17.782	356.38	21.905	104.13	23.242	43.489		261.59	261.59	516.41	43.489	43.022	182.11	87.982	79.826	77.004	33.124
	288.93	180.43	87.982	27.587	49.699	64.013	83.372		96.661	28.924	322.71	24.866	93.995	26.973	42.217		249.17	249.17	474.69	42.217	44.872	179.98	87.52	70.985	91.204	40.008
	271.54	166.87	88.895	15.186	38.758	43.568	82.799		92.777	47.51	277.91	27.998	73.487	31.679	39.978		221	221	389.58	39.978	46.538	168.63	86.975	60.594	119.13	50.094
	245.22	152.89	83.925	12.542	35.09	26.409	76.73		94.383	70.378	230.4	30.762	48.991	37.373	37.845		185.99	185.99	285.51	37.845	47.477	155.48	90.07	50.463	150.88	62.798
	217.27	143.32	74.027	22.624	35.477	15.713	68.441		99.264	94.368	188.57	32.62	26.894	44.069	36.894		153.03	153.03	186.91	36.894	47.144	147.93	100.53	42.399	176.54	77.539
	195.02	138.67	63.354	41.582	36.701	13.915	61.205		105.2	116.32	160.86	33.033	13.584	51.778	38.198		131.02	131.02	118.21	38.198	44.853	153.39	122.07	38.212	186.19	93.736
	175.29	135.74	56.061	64.963	35.543	18.897	58.297		109.21	138.74	148.72	31.216	11.065	63.158	42.143		121.21	121.21	83.057	42.143	40.969	179.57	163.55	39.912	174.84	116.16
	110.99	115.43	47.092	180.38	26.547	183.26	109.27		267.78	52.487	302.12	57.068	116.54	25.96	73.316		181.07	181.07	69.011	73.316	51.506	83.607	157.65	141.81	183.46	40.904
	99.093	111.95	45.219	187.95	14.634	189.59	92.23		395.2	56.082	302.82	50.84	96.619	25.543	75.369		200.23	200.23	93.432	75.369	57.26	96.205	142.27	149.04	168.58	36.879
	87.154	112.07	45.622	195.56	7.5915	186.12	72.211		504.69	60.325	298.8	46.185	77.933	25.065	76.544		214.9	214.9	117.1	76.544	62.647	106.22	131.82	152.87	153.95	33.601
	78.961	119.31	47.794	203.57	3.7808	167.19	54.127		567.03	62.251	287.33	44.96	63.495	24.622	76.218		217.17	217.17	133.76	76.218	68.851	109.57	132.57	151.69	143.65	31.15
	74.419	133.35	51.231	208.63	1.5651	135.41	42.888		571.05	61.572	262.3	49	53.054	24.112	73.767		202.88	202.88	142.76	73.767	76.251	102.3	150.9	143.61	138.77	29.088
	71.005	148.88	55.426	207.41	1.4927	99.252	40.515		536.21	60.266	225.51	57.068	44.601	23.47	69.606		177.29	177.29	148.27	69.606	83.07	87.126	182.67	129.7	136.62	27.359
	68.861	160.63	62.137	196.54	4.6552	67.204	43.734		479.28	58.764	186.14	66.411	38.514	22.85	64.671		146.65	146.65	151.27	64.671	87.527	69.989	218.26	112.8	135.52	26.624
	68.128	163.3	71.702	170.15	10.23	47.753	49.513		417.06	57.494	153.38	74.275	35.17	22.407	59.9		117.21	117.21	152.73	59.9	87.845	56.812	248.04	95.758	133.79	27.542
	68.95	153.97	81.483	130.47	17.394	43.045	54.823		366.33	56.887	136.41	77.907	34.945	22.297	56.229		95.2	95.2	153.62	56.229	82.144	53.526	262.4	81.41	129.77	30.773
	71.57	136.17	88.843	86.321	25.325	47.421	56.631		321.91	57.214	137.66	76.584	40.346	22.766	53.799		79.904	79.904	151.8	53.799	71.611	64.515	256.72	67.864	121.2	38.339
	75.893	114.29	91.145	46.528	33.049	57.665	54.13		272.64	58.19	151	72.139	51.121	23.712	51.985		67.156	67.156	146.61	51.985	59.063	85.827	237.41	53.227	109.2	49.8
	81.554	92.689	85.938	19.912	41.115	70.561	49.341		226.24	59.405	172.79	65.661	63.511	24.764	50.577		58.046	58.046	141.29	50.577	47.318	110.88	211.41	40.338	97.143	62.123
	88.185	75.764	74.982	8.5903	50.983	82.891	43.475		190.44	60.452	199.4	58.236	73.757	25.55	49.363		53.663	53.663	139.07	49.363	39.192	133.11	185.63	32.035	88.393	72.274
	95.418	61.848	61.95	6.6815	64.114	97.362	37.743		172.99	60.923	227.16	50.954	78.1	25.702	48.133		55.098	55.098	143.17	48.133	35.309	145.91	167.02	31.156	86.318	77.221
	103.34	48.021	50.516	11.009	81.969	116.12	33.356		184.33	61.175	261.54	42.69	73.424	24.961	46.883		63.642	63.642	152.55	46.883	33.793	145.44	156.68	41.892	94.6	75.339
	112.2	36.777	44.352	18.396	111.42	135.1	29.287		219.31	61.479	304.97	32.718	62.234	23.574	45.752		78.569	78.569	165.03	45.752	33.705	136.07	150.01	62.352	110.99	68.651
	121.86	30.61	44.796	25.666	151.5	150.25	24.727		262.25	61.3	349.26	22.725	49.206	21.928	44.747		97.941	97.941	182.22	44.747	34.11	123.61	145.31	86.248	129.97	59.592
	132.2	32.015	49.398	35.451	191.9	157.51	21.219		297.45	60.103	386.24	14.397	39.013	20.409	43.875		119.82	119.82	205.72	43.875	34.072	113.85	140.93	107.29	146.03	50.6
	143.08	45.041	56.154	49.87	222.29	155.31	20.305		309.24	57.353	407.72	9.4194	36.332	19.404	43.143		142.27	142.27	237.13	43.143	33.574	112.6	135.17	119.2	153.63	44.111
	155.24	68.026	63.06	64.973	232.36	146.36	23.527		289.85	50.628	411.2	8.7545	45.24	18.576	42.662		169.78	169.78	289.08	42.662	33.241	123.71	126.53	120.24	148.81	39.432
	168.79	94.894	68.115	76.812	214.19	133.01	33.725		249.73	40.285	402.13	11.278	62.622	17.667	42.429		203.65	203.65	360.51	42.429	33.096	143.33	116.12	114.58	135.23	34.938
	182.59	119.57	71.55	81.438	174.65	117.59	49.872		200.54	29.956	384.28	15.547	82.358	17.183	42.274		237.14	237.14	432.46	42.274	33.165	165.66	106.22	104.85	118.87	31.669
	195.53	135.99	74.701	74.69	125.64	102.46	67.706		153.92	23.273	361.37	20.12	98.332	17.629	42.028		263.48	263.48	485.97	42.028	33.472	184.88	99.098	93.658	105.71	30.665
	206.47	142.26	77.219	59.202	79.027	85.393	82.966		121.54	23.868	337.16	23.552	104.42	19.512	41.523		275.94	275.94	502.07	41.523	34.202	195.22	97.036	83.62	101.72	32.965
	217.54	142.44	78.753	41.213	46.695	64.822	91.391		104.59	33.564	307.21	26.214	96.748	22.928	39.848		269.7	269.7	466.73	39.848	35.339	191.68	97.302	73.168	111.86	38.805
	229.5	139.34	78.952	26.964	30.744	44.081	90.412		95.304	49.942	269.03	29.068	79.382	27.539	37.117		249.26	249.26	392.6	37.117	36.605	178.15	98.378	60.56	132.17	47.492
	239.15	135.79	76.053	22.695	23.254	26.504	82.869		91.88	70.264	229.27	31.56	58.157	33.201	34.694		221.83	221.83	300.72	34.694	37.723	162.07	104.36	48.146	155.18	58.672
	243.3	134.62	70.288	31.456	21.075	15.422	72.617		92.516	91.792	194.57	33.133	38.904	39.77	33.941		194.65	194.65	212.13	33.941	38.415	150.91	119.35	38.276	173.42	71.99
	238.78	137.06	64.304	49.085	21.057	13.121	63.511		95.408	111.79	171.58	33.233	27.454	47.102	36.222		174.92	174.92	147.87	36.222	38.643	152.1	147.44	33.303	179.43	87.092
	219.59	141.24	60.748	71.011	20.05	17.378	59.404		98.133	132.71	161.99	30.914	25.6	57.531	42.864		162.36	162.36	108.98	42.864	38.592	172.43	200.36	35.627	169.5	108.49
	187.85	145.28	62.265	92.659	17.802	24.768	62.699		101.89	156.39	161.37	26.546	29.456	71.154	52.956		152.15	152.15	81.428	52.956	38.319	206.92	275.39	43.682	148.59	136.42
	152.56	147.35	71.373	109.46	16.414	31.862	70.828		110.32	179.13	167.18	21.548	36.33	84.468	64.511		144.73	144.73	63.663	64.511	37.881	245.41	354.92	53.865	122.28	164.11
	122.68	145.57	86.308	121.86	16.263	35.236	80.185		127.06	197.25	176.88	17.34	43.531	93.974	75.538		140.54	140.54	54.125	75.538	37.337	277.78	421.36	62.57	96.178	184.8
	107.19	137.48	103.29	132.91	17.725	33.91	87.167		155.74	207.06	187.92	15.34	48.369	96.172	84.049		140.03	140.03	51.256	84.049	36.507	293.85	457.09	66.193	75.852	191.72
	111.82	124.3	118.55	141.93	21.177	30.169	88.17		207.5	207.4	202.57	16.018	51.233	87.811	90.436		146.53	146.53	59.574	90.436	35.351	285.25	454.22	61.841	59.864	179.6
	89.159	171.91	77.634	111.36	154.8	118.57	103.09		91.405	86.679	318.91	61.504	146.75	23.43	55.679		165.18	165.18	74.291	55.679	26.929	106.64	175.36	104.64	161.64	65.369
	116.64	151.52	68.421	120.62	116.63	129.21	114.7		92.88	65.72	329.06	58.861	140.63	25.358	59.52		158.91	158.91	54.149	59.52	28.859	110.19	173.33	113.66	182.41	59.282
	132.28	142.8	61.027	129.86	81.35	141.26	122.55		114.19	52.139	335.08	55.978	132.98	26.501	62.821		160.33	160.33	45.715	62.821	34.74	110.53	170.96	120.72	192.88	53.865
	133.12	140.44	55.223	139.02	53.956	155.03	124		168.78	47.974	337.41	52.043	122.62	26.602	65.974		176.25	176.25	53.667	65.974	44.333	107.69	166.2	126.64	189.76	48.64
	124.64	141.28	50.78	148.03	35.206	167.15	115.91		250.96	50.177	336.88	46.998	109.28	25.993	69.343		205.49	205.49	73.61	69.343	55.286	104.67	158.02	132.22	177.47	42.713
	111.3	142.13	47.614	156.84	21.776	174.24	100.07		340.57	55.691	332.82	42.057	94.723	25.062	72.343		237.85	237.85	98.529	72.343	65.248	101.44	149.49	136.22	160.97	36.797
	97.553	139.82	45.876	168.8	12.523	172.91	81.147		417.44	61.455	324.53	38.435	80.711	24.193	74.39		263.17	263.17	121.41	74.39	71.87	97.965	143.7	137.42	145.17	31.609
	87.846	134.1	45.695	183.95	6.3051	158.37	63.827		461.43	64.413	311.33	37.349	69.011	23.773	74.896		271.25	271.25	135.24	74.896	74.751	94.194	143.74	134.59	135.03	27.864
	81.928	127.07	47.2	197.26	1.9799	132.88	52.788		464.37	64.223	288.17	40.096	58.802	23.969	73.364		256.91	256.91	136.87	73.364	75.459	88.365	153.22	126.06	132.27	25.168
	76.831	119.14	50.519	203.71	-0.21207	103.62	49.777		439.72	62.924	255.52	45.866	48.908	24.525	70.184		226.92	226.92	130.99	70.184	74.592	80.502	170.08	112.65	133.6	23.045
	72.936	110.68	57.825	198.27	0.49061	77.789	51.675		399.69	61.028	220.94	52.712	40.559	25.188	66.104		189.09	189.09	122.3	66.104	72.751	73.259	188.91	96.865	136.43	22.084
	70.619	102.09	69.032	174.73	3.7273	62.577	55.859		356.5	59.046	191.99	58.684	34.984	25.706	61.872		151.21	151.21	115.52	61.872	70.534	69.285	204.27	81.194	138.15	22.876
	70.26	93.063	80.881	136.43	9.1376	60.217	59.71		322.37	57.49	176.25	61.834	33.413	25.828	58.236		121.08	121.08	115.36	58.236	67.583	71.231	210.74	68.138	136.14	26.009
	71.563	83.349	90.113	92.709	16.361	65.915	60.605		293.39	56.117	175.94	61.871	38.528	25.434	55.02		96.396	96.396	123.64	55.02	63.499	82.517	204.94	55.84	127.61	33.465
	74.275	73.391	93.47	52.865	24.525	76.321	57.9		261.4	54.587	186.01	60.094	49.508	24.69	51.725		71.965	71.965	137.23	51.725	58.818	101.38	190.48	42.634	114.28	44.849
	78.84	63.636	88.232	26.215	33.869	88.084	53.343		232.28	53.263	203.13	56.94	62.331	23.778	48.616		51.233	51.233	153.38	48.616	54.081	122.68	172.44	31.307	100.38	57.192
	85.704	54.53	76.571	14.383	45.704	97.854	47.9		211.93	52.509	223.97	52.846	72.978	22.879	45.955		37.65	37.65	169.35	45.955	49.825	141.29	155.9	24.646	90.112	67.524
	95.311	44.404	62.567	11.161	61.336	107.07	42.538		206.22	52.69	245.23	48.249	77.425	22.176	44.005		34.663	34.663	182.42	44.005	45.944	152.09	145.92	25.437	87.699	72.875
	110.87	32.96	50.3	14.112	82.074	117.98	38.224		225.1	54.799	271.4	42.127	72.535	21.766	43.035		45.227	45.227	189.11	43.035	42.077	151.58	144.93	38.1	96.893	71.802
	132.09	22.703	43.852	20.8	115.73	128.4	33.809		264.62	58.59	304.72	34.189	60.989	21.53	42.867		67.04	67.04	191.26	42.867	38.387	143.17	149.56	60.777	114.88	66.285
	154.15	16.134	44.875	28.79	161.42	136.18	28.649		309.91	62.578	338.4	25.968	47.494	21.318	43.102		95.675	95.675	194.05	43.102	35.034	132.11	156.15	86.839	136.04	58.488
	172.24	15.758	50.647	41.512	207.44	139.14	24.466		346.05	65.275	365.66	18.996	36.759	20.98	43.339		126.7	126.7	202.68	43.339	32.18	123.66	161.09	109.66	154.73	50.579
	181.53	23.982	58.691	60.59	242.08	136.44	22.982		358.16	65.191	379.72	14.804	33.493	20.369	43.18		155.7	155.7	222.35	43.18	29.816	123.07	160.73	122.61	165.33	44.722
	176.62	39.137	66.529	80.879	253.64	129.53	25.921		338.27	60.041	377.61	14.139	41.185	18.811	42.596		186.31	186.31	263.74	42.596	27.837	134.09	151.51	123.75	165.17	40.249
	160.71	57.612	71.683	97.233	233.05	119.67	36.244		296.29	50.817	363.87	15.978	56.696	16.408	41.854		221.48	221.48	323.39	41.854	26.252	153.23	135.85	117.52	157.99	35.715
	141.93	75.796	73.872	104.51	188.14	108.14	52.802		244.2	40.948	342.92	19.204	74.792	14.165	40.995		255.74	255.74	385.27	40.995	25.073	174.84	119.1	106.8	147.81	32.125
	128.4	90.078	74.75	98.313	132.47	96.204	71.153		193.95	33.864	319.22	22.701	90.238	13.09	40.061		283.64	283.64	433.34	40.061	24.311	193.29	106.62	94.481	138.65	30.483
	128.24	99.92	74.736	82.079	79.604	82.018	86.854		157.52	32.995	297.2	25.35	97.8	14.189	39.093		299.69	299.69	451.56	39.093	23.821	202.93	103.77	83.46	134.51	31.792
	149.83	107.73	74.246	62.391	43.108	64.732	95.462		135.23	39.628	274.11	27.554	94.726	18.054	36.868		300.94	300.94	430.64	36.868	23.593	199.61	108.23	71.969	137.87	36.231
	187.77	114.31	73.7	45.832	25.136	47.121	94.331		119.13	51.475	246.99	30.057	84.507	24.012	33.358		291.02	291.02	381.27	33.358	23.849	187.1	116.45	58.079	146.05	43.13
	229.47	120.48	72.055	38.986	16.642	31.957	86.422		108.69	66.607	219.98	32.258	71.269	31.179	30.398		274.4	274.4	317.39	30.398	24.807	171.61	131.88	44.441	155.35	52.223
	262.36	127.03	69.034	44.659	14.4	22.011	75.705		103.38	83.095	197.2	33.554	59.137	38.669	29.824		255.53	255.53	252.95	29.824	26.686	159.35	157.98	33.705	162.05	63.242
	273.86	135.82	66.197	58.461	15.179	18.899	66.15		102.71	99.008	182.81	33.344	52.238	45.597	33.472		238.86	238.86	201.9	33.472	30.426	156.54	198.2	28.52	162.43	75.92
	255.58	146.32	65.109	76.185	15.75	20.77	61.726		106.01	116.66	178.89	30.467	51.775	53.329	43.8		221.95	221.95	161.39	43.8	35.879	168.18	268.14	31.56	154.49	93.765
	215.9	155.74	67.331	93.622	16.648	25.205	64.983		113.65	137.35	182.68	25.325	54.996	62.454	59.585		201.81	201.81	122.13	59.585	41.639	190.14	365.48	41.059	140.7	116.95
	167.42	161.3	74.427	106.57	20.027	29.786	73.275		126.57	157.58	191.05	19.658	60.099	70.926	77.139		182.14	182.14	88.375	77.139	46.296	214.89	466.86	53.005	124.07	140.23
	122.7	160.23	85.356	114.72	25.084	32.09	82.777		145.75	173.9	200.84	15.209	65.279	76.695	92.769		166.63	166.63	64.405	92.769	48.443	234.94	548.88	63.39	107.62	158.32
	94.338	148.03	97.772	120.88	31.015	31.722	89.666		172.16	182.82	208.93	13.719	68.734	77.715	102.79		158.95	158.95	54.483	102.79	46.848	242.76	588.18	68.204	94.339	165.97
	85.896	126.55	109.33	125.51	37.016	30.294	90.119		214.94	183.22	213.29	16.124	70.985	71.868	106.23		162.79	162.79	65.249	106.23	42.449	231.03	571.75	64.434	83.457	159.77
	51.298	90.309	61.227	33.118	131.65	164.59	25.094		213.04	56.335	362.64	10.902	53.919	21.838	42.021		162.98	162.98	177.31	42.021	37.477	98.936	106.92	92.958	137.86	45.345
	66.678	179.93	60.987	206.39	12.53	93.804	32.064		585.27	61.527	202.07	61.692	43.266	22.984	68.117		143.87	143.87	165.1	68.117	92.056	91.263	188.17	139.59	142.49	31.748
	66.439	213.59	66.917	193.6	19.868	65.744	36.947		522.24	60.232	161.82	71.963	40.156	21.694	63.895		118.9	118.9	176.27	63.895	101.79	69.968	233.03	121.88	137.47	31.06
	67.398	228.92	75.471	168.01	29.234	48.735	44.443		452.14	59.245	128.46	80.555	39.519	20.775	59.885		95.823	95.823	183.35	59.885	104.38	52.616	270.81	103.95	132.17	31.827
	69.53	220.33	84.27	131.02	39.08	44.438	51.205		393.23	58.898	111.69	84.387	40.719	20.593	56.86		79.631	79.631	184.61	56.86	96.8	46.58	289.66	88.9	125.94	34.734
	73.722	195.3	90.933	90.308	47.857	48	53.889		339.18	59.639	113.94	82.615	45.854	21.613	55.059		70.321	70.321	175.13	55.059	81.489	56.395	284.44	75.001	116.96	41.673
	79.991	162.21	93.083	53.538	54.467	56.935	51.39		277.83	61.246	128.73	77.292	55.348	23.59	53.97		64.563	64.563	156.06	53.97	62.98	77.145	263.04	60.164	105.65	52.185
	87.005	129.42	88.64	28.382	59.941	68.754	45.94		218.67	63.048	152.43	69.685	66.053	25.827	53.229		62.365	62.365	134.78	53.229	45.809	102.03	233.18	47.008	94.764	63.437
	93.437	105.3	79.192	16.756	65.929	80.969	39.193		171.17	64.372	181.4	61.06	74.824	27.628	52.475		63.731	63.731	118.68	52.475	34.511	124.25	202.58	38.152	87.024	72.591
	97.956	88.308	67.855	13.549	74.079	96.74	32.802		144.81	64.546	212.01	52.682	78.514	28.296	51.347		68.668	68.668	115.17	51.347	30.156	136.99	178.95	36.214	85.165	76.813
	97.166	72.861	57.745	15.882	86.043	117.72	28.421		150.03	63.658	250.03	43.314	74.344	27.357	49.632		78.016	78.016	124.77	49.632	29.722	136.51	162.39	45.018	92.886	74.497
	91.954	61.282	51.979	20.88	106.88	139.18	25.445		180.49	62.154	297.89	32.112	64.411	25.275	47.573		91.773	91.773	142.56	47.573	31.601	127.35	147.75	62.818	108.36	67.533
	87.414	55.897	51.369	25.665	135.48	156.38	22.771		220.57	59.906	346.92	20.933	52.886	22.761	45.485		108.68	108.68	167.73	45.485	34.188	115.13	134.89	83.88	126.05	58.33
	88.639	59.029	53.838	32.407	164.27	164.57	21.307		254.62	56.782	388.46	11.633	43.937	20.529	43.686		127.46	127.46	199.48	43.686	35.875	105.47	123.65	102.47	140.41	49.294
	100.72	76.211	58.167	43.024	185.66	161.8	21.961		267.01	52.652	413.86	6.0685	41.734	19.29	42.492		146.86	146.86	236.99	42.492	36.733	104.01	113.87	112.84	145.88	42.835
	131.2	105.89	63.136	54.261	192.05	151.22	25.64		250.75	45.014	421.17	5.3143	50.313	18.858	42.161		171.4	171.4	293.63	42.161	37.832	114.23	105.22	113.4	137.55	38.215
	176.68	139.78	67.524	62.865	177.42	135.78	34.639		216.26	33.954	416.16	8.1327	66.892	18.758	42.483		201.9	201.9	369.93	42.483	39.068	132.38	97.814	107.94	119.11	33.828
	225.85	169.56	72.289	65.581	146.84	118.41	48.351		174.03	23.227	401.76	12.912	85.421	19.269	43.07		231.61	231.61	445.86	43.07	40.336	153.23	92.138	98.915	97.954	30.78
	267.41	186.96	78.243	58.56	109.33	102.05	63.337		134.53	16.585	380.86	18.04	99.849	20.67	43.534		253.76	253.76	501.37	43.534	41.534	171.55	88.694	88.734	81.457	30.177
	290.07	188.73	83.953	43.97	73.938	84.565	76.157		108.25	17.782	356.38	21.905	104.13	23.242	43.489		261.59	261.59	516.41	43.489	43.022	182.11	87.982	79.826	77.004	33.124
	288.93	180.43	87.982	27.587	49.699	64.013	83.372		96.661	28.924	322.71	24.866	93.995	26.973	42.217		249.17	249.17	474.69	42.217	44.872	179.98	87.52	70.985	91.204	40.008
	271.54	166.87	88.895	15.186	38.758	43.568	82.799		92.777	47.51	277.91	27.998	73.487	31.679	39.978		221	221	389.58	39.978	46.538	168.63	86.975	60.594	119.13	50.094
	245.22	152.89	83.925	12.542	35.09	26.409	76.73		94.383	70.378	230.4	30.762	48.991	37.373	37.845		185.99	185.99	285.51	37.845	47.477	155.48	90.07	50.463	150.88	62.798
	217.27	143.32	74.027	22.624	35.477	15.713	68.441		99.264	94.368	188.57	32.62	26.894	44.069	36.894		153.03	153.03	186.91	36.894	47.144	147.93	100.53	42.399	176.54	77.539
	195.02	138.67	63.354	41.582	36.701	13.915	61.205		105.2	116.32	160.86	33.033	13.584	51.778	38.198		131.02	131.02	118.21	38.198	44.853	153.39	122.07	38.212	186.19	93.736
	175.29	135.74	56.061	64.963	35.543	18.897	58.297		109.21	138.74	148.72	31.216	11.065	63.158	42.143		121.21	121.21	83.057	42.143	40.969	179.57	163.55	39.912	174.84	116.16
	110.99	115.43	47.092	180.38	26.547	183.26	109.27		267.78	52.487	302.12	57.068	116.54	25.96	73.316		181.07	181.07	69.011	73.316	51.506	83.607	157.65	141.81	183.46	40.904
	99.093	111.95	45.219	187.95	14.634	189.59	92.23		395.2	56.082	302.82	50.84	96.619	25.543	75.369		200.23	200.23	93.432	75.369	57.26	96.205	142.27	149.04	168.58	36.879
	87.154	112.07	45.622	195.56	7.5915	186.12	72.211		504.69	60.325	298.8	46.185	77.933	25.065	76.544		214.9	214.9	117.1	76.544	62.647	106.22	131.82	152.87	153.95	33.601
	78.961	119.31	47.794	203.57	3.7808	167.19	54.127		567.03	62.251	287.33	44.96	63.495	24.622	76.218		217.17	217.17	133.76	76.218	68.851	109.57	132.57	151.69	143.65	31.15
	74.419	133.35	51.231	208.63	1.5651	135.41	42.888		571.05	61.572	262.3	49	53.054	24.112	73.767		202.88	202.88	142.76	73.767	76.251	102.3	150.9	143.61	138.77	29.088
	71.005	148.88	55.426	207.41	1.4927	99.252	40.515		536.21	60.266	225.51	57.068	44.601	23.47	69.606		177.29	177.29	148.27	69.606	83.07	87.126	182.67	129.7	136.62	27.359
	68.861	160.63	62.137	196.54	4.6552	67.204	43.734		479.28	58.764	186.14	66.411	38.514	22.85	64.671		146.65	146.65	151.27	64.671	87.527	69.989	218.26	112.8	135.52	26.624
	68.128	163.3	71.702	170.15	10.23	47.753	49.513		417.06	57.494	153.38	74.275	35.17	22.407	59.9		117.21	117.21	152.73	59.9	87.845	56.812	248.04	95.758	133.79	27.542
	68.95	153.97	81.483	130.47	17.394	43.045	54.823		366.33	56.887	136.41	77.907	34.945	22.297	56.229		95.2	95.2	153.62	56.229	82.144	53.526	262.4	81.41	129.77	30.773
	71.57	136.17	88.843	86.321	25.325	47.421	56.631		321.91	57.214	137.66	76.584	40.346	22.766	53.799		79.904	79.904	151.8	53.799	71.611	64.515	256.72	67.864	121.2	38.339
	75.893	114.29	91.145	46.528	33.049	57.665	54.13		272.64	58.19	151	72.139	51.121	23.712	51.985		67.156	67.156	146.61	51.985	59.063	85.827	237.41	53.227	109.2	49.8
	81.554	92.689	85.938	19.912	41.115	70.561	49.341		226.24	59.405	172.79	65.661	63.511	24.764	50.577		58.046	58.046	141.29	50.577	47.318	110.88	211.41	40.338	97.143	62.123
	88.185	75.764	74.982	8.5903	50.983	82.891	43.475		190.44	60.452	199.4	58.236	73.757	25.55	49.363		53.663	53.663	139.07	49.363	39.192	133.11	185.63	32.035	88.393	72.274
	95.418	61.848	61.95	6.6815	64.114	97.362	37.743		172.99	60.923	227.16	50.954	78.1	25.702	48.133		55.098	55.098	143.17	48.133	35.309	145.91	167.02	31.156	86.318	77.221
	103.34	48.021	50.516	11.009	81.969	116.12	33.356		184.33	61.175	261.54	42.69	73.424	24.961	46.883		63.642	63.642	152.55	46.883	33.793	145.44	156.68	41.892	94.6	75.339
	112.2	36.777	44.352	18.396	111.42	135.1	29.287		219.31	61.479	304.97	32.718	62.234	23.574	45.752		78.569	78.569	165.03	45.752	33.705	136.07	150.01	62.352	110.99	68.651
	121.86	30.61	44.796	25.666	151.5	150.25	24.727		262.25	61.3	349.26	22.725	49.206	21.928	44.747		97.941	97.941	182.22	44.747	34.11	123.61	145.31	86.248	129.97	59.592
	132.2	32.015	49.398	35.451	191.9	157.51	21.219		297.45	60.103	386.24	14.397	39.013	20.409	43.875		119.82	119.82	205.72	43.875	34.072	113.85	140.93	107.29	146.03	50.6
	143.08	45.041	56.154	49.87	222.29	155.31	20.305		309.24	57.353	407.72	9.4194	36.332	19.404	43.143		142.27	142.27	237.13	43.143	33.574	112.6	135.17	119.2	153.63	44.111
	155.24	68.026	63.06	64.973	232.36	146.36	23.527		289.85	50.628	411.2	8.7545	45.24	18.576	42.662		169.78	169.78	289.08	42.662	33.241	123.71	126.53	120.24	148.81	39.432
	168.79	94.894	68.115	76.812	214.19	133.01	33.725		249.73	40.285	402.13	11.278	62.622	17.667	42.429		203.65	203.65	360.51	42.429	33.096	143.33	116.12	114.58	135.23	34.938
	182.59	119.57	71.55	81.438	174.65	117.59	49.872		200.54	29.956	384.28	15.547	82.358	17.183	42.274		237.14	237.14	432.46	42.274	33.165	165.66	106.22	104.85	118.87	31.669
	195.53	135.99	74.701	74.69	125.64	102.46	67.706		153.92	23.273	361.37	20.12	98.332	17.629	42.028		263.48	263.48	485.97	42.028	33.472	184.88	99.098	93.658	105.71	30.665
	206.47	142.26	77.219	59.202	79.027	85.393	82.966		121.54	23.868	337.16	23.552	104.42	19.512	41.523		275.94	275.94	502.07	41.523	34.202	195.22	97.036	83.62	101.72	32.965
	217.54	142.44	78.753	41.213	46.695	64.822	91.391		104.59	33.564	307.21	26.214	96.748	22.928	39.848		269.7	269.7	466.73	39.848	35.339	191.68	97.302	73.168	111.86	38.805
	229.5	139.34	78.952	26.964	30.744	44.081	90.412		95.304	49.942	269.03	29.068	79.382	27.539	37.117		249.26	249.26	392.6	37.117	36.605	178.15	98.378	60.56	132.17	47.492
	239.15	135.79	76.053	22.695	23.254	26.504	82.869		91.88	70.264	229.27	31.56	58.157	33.201	34.694		221.83	221.83	300.72	34.694	37.723	162.07	104.36	48.146	155.18	58.672
	243.3	134.62	70.288	31.456	21.075	15.422	72.617		92.516	91.792	194.57	33.133	38.904	39.77	33.941		194.65	194.65	212.13	33.941	38.415	150.91	119.35	38.276	173.42	71.99
	238.78	137.06	64.304	49.085	21.057	13.121	63.511		95.408	111.79	171.58	33.233	27.454	47.102	36.222		174.92	174.92	147.87	36.222	38.643	152.1	147.44	33.303	179.43	87.092
	219.59	141.24	60.748	71.011	20.05	17.378	59.404		98.133	132.71	161.99	30.914	25.6	57.531	42.864		162.36	162.36	108.98	42.864	38.592	172.43	200.36	35.627	169.5	108.49
	187.85	145.28	62.265	92.659	17.802	24.768	62.699		101.89	156.39	161.37	26.546	29.456	71.154	52.956		152.15	152.15	81.428	52.956	38.319	206.92	275.39	43.682	148.59	136.42
	152.56	147.35	71.373	109.46	16.414	31.862	70.828		110.32	179.13	167.18	21.548	36.33	84.468	64.511		144.73	144.73	63.663	64.511	37.881	245.41	354.92	53.865	122.28	164.11
	122.68	145.57	86.308	121.86	16.263	35.236	80.185		127.06	197.25	176.88	17.34	43.531	93.974	75.538		140.54	140.54	54.125	75.538	37.337	277.78	421.36	62.57	96.178	184.8
	107.19	137.48	103.29	132.91	17.725	33.91	87.167		155.74	207.06	187.92	15.34	48.369	96.172	84.049		140.03	140.03	51.256	84.049	36.507	293.85	457.09	66.193	75.852	191.72
	111.82	124.3	118.55	141.93	21.177	30.169	88.17		207.5	207.4	202.57	16.018	51.233	87.811	90.436		146.53	146.53	59.574	90.436	35.351	285.25	454.22	61.841	59.864	179.6
	89.159	171.91	77.634	111.36	154.8	118.57	103.09		91.405	86.679	318.91	61.504	146.75	23.43	55.679		165.18	165.18	74.291	55.679	26.929	106.64	175.36	104.64	161.64	65.369
	116.64	151.52	68.421	120.62	116.63	129.21	114.7		92.88	65.72	329.06	58.861	140.63	25.358	59.52		158.91	158.91	54.149	59.52	28.859	110.19	173.33	113.66	182.41	59.282
	132.28	142.8	61.027	129.86	81.35	141.26	122.55		114.19	52.139	335.08	55.978	132.98	26.501	62.821		160.33	160.33	45.715	62.821	34.74	110.53	170.96	120.72	192.88	53.865
	133.12	140.44	55.223	139.02	53.956	155.03	124		168.78	47.974	337.41	52.043	122.62	26.602	65.974		176.25	176.25	53.667	65.974	44.333	107.69	166.2	126.64	189.76	48.64
	124.64	141.28	50.78	148.03	35.206	167.15	115.91		250.96	50.177	336.88	46.998	109.28	25.993	69.343		205.49	205.49	73.61	69.343	55.286	104.67	158.02	132.22	177.47	42.713
	111.3	142.13	47.614	156.84	21.776	174.24	100.07		340.57	55.691	332.82	42.057	94.723	25.062	72.343		237.85	237.85	98.529	72.343	65.248	101.44	149.49	136.22	160.97	36.797
	97.553	139.82	45.876	168.8	12.523	172.91	81.147		417.44	61.455	324.53	38.435	80.711	24.193	74.39		263.17	263.17	121.41	74.39	71.87	97.965	143.7	137.42	145.17	31.609
	87.846	134.1	45.695	183.95	6.3051	158.37	63.827		461.43	64.413	311.33	37.349	69.011	23.773	74.896		271.25	271.25	135.24	74.896	74.751	94.194	143.74	134.59	135.03	27.864
	81.928	127.07	47.2	197.26	1.9799	132.88	52.788		464.37	64.223	288.17	40.096	58.802	23.969	73.364		256.91	256.91	136.87	73.364	75.459	88.365	153.22	126.06	132.27	25.168
	76.831	119.14	50.519	203.71	-0.21207	103.62	49.777		439.72	62.924	255.52	45.866	48.908	24.525	70.184		226.92	226.92	130.99	70.184	74.592	80.502	170.08	112.65	133.6	23.045
	72.936	110.68	57.825	198.27	0.49061	77.789	51.675		399.69	61.028	220.94	52.712	40.559	25.188	66.104		189.09	189.09	122.3	66.104	72.751	73.259	188.91	96.865	136.43	22.084
	70.619	102.09	69.032	174.73	3.7273	62.577	55.859		356.5	59.046	191.99	58.684	34.984	25.706	61.872		151.21	151.21	115.52	61.872	70.534	69.285	204.27	81.194	138.15	22.876
	70.26	93.063	80.881	136.43	9.1376	60.217	59.71		322.37	57.49	176.25	61.834	33.413	25.828	58.236		121.08	121.08	115.36	58.236	67.583	71.231	210.74	68.138	136.14	26.009
	71.563	83.349	90.113	92.709	16.361	65.915	60.605		293.39	56.117	175.94	61.871	38.528	25.434	55.02		96.396	96.396	123.64	55.02	63.499	82.517	204.94	55.84	127.61	33.465
	74.275	73.391	93.47	52.865	24.525	76.321	57.9		261.4	54.587	186.01	60.094	49.508	24.69	51.725		71.965	71.965	137.23	51.725	58.818	101.38	190.48	42.634	114.28	44.849
	78.84	63.636	88.232	26.215	33.869	88.084	53.343		232.28	53.263	203.13	56.94	62.331	23.778	48.616		51.233	51.233	153.38	48.616	54.081	122.68	172.44	31.307	100.38	57.192
	85.704	54.53	76.571	14.383	45.704	97.854	47.9		211.93	52.509	223.97	52.846	72.978	22.879	45.955		37.65	37.65	169.35	45.955	49.825	141.29	155.9	24.646	90.112	67.524
	95.311	44.404	62.567	11.161	61.336	107.07	42.538		206.22	52.69	245.23	48.249	77.425	22.176	44.005		34.663	34.663	182.42	44.005	45.944	152.09	145.92	25.437	87.699	72.875
	110.87	32.96	50.3	14.112	82.074	117.98	38.224		225.1	54.799	271.4	42.127	72.535	21.766	43.035		45.227	45.227	189.11	43.035	42.077	151.58	144.93	38.1	96.893	71.802
	132.09	22.703	43.852	20.8	115.73	128.4	33.809		264.62	58.59	304.72	34.189	60.989	21.53	42.867		67.04	67.04	191.26	42.867	38.387	143.17	149.56	60.777	114.88	66.285
	154.15	16.134	44.875	28.79	161.42	136.18	28.649		309.91	62.578	338.4	25.968	47.494	21.318	43.102		95.675	95.675	194.05	43.102	35.034	132.11	156.15	86.839	136.04	58.488
	172.24	15.758	50.647	41.512	207.44	139.14	24.466		346.05	65.275	365.66	18.996	36.759	20.98	43.339		126.7	126.7	202.68	43.339	32.18	123.66	161.09	109.66	154.73	50.579
	181.53	23.982	58.691	60.59	242.08	136.44	22.982		358.16	65.191	379.72	14.804	33.493	20.369	43.18		155.7	155.7	222.35	43.18	29.816	123.07	160.73	122.61	165.33	44.722
	176.62	39.137	66.529	80.879	253.64	129.53	25.921		338.27	60.041	377.61	14.139	41.185	18.811	42.596		186.31	186.31	263.74	42.596	27.837	134.09	151.51	123.75	165.17	40.249
	160.71	57.612	71.683	97.233	233.05	119.67	36.244		296.29	50.817	363.87	15.978	56.696	16.408	41.854		221.48	221.48	323.39	41.854	26.252	153.23	135.85	117.52	157.99	35.715
	141.93	75.796	73.872	104.51	188.14	108.14	52.802		244.2	40.948	342.92	19.204	74.792	14.165	40.995		255.74	255.74	385.27	40.995	25.073	174.84	119.1	106.8	147.81	32.125
	128.4	90.078	74.75	98.313	132.47	96.204	71.153		193.95	33.864	319.22	22.701	90.238	13.09	40.061		283.64	283.64	433.34	40.061	24.311	193.29	106.62	94.481	138.65	30.483
	128.24	99.92	74.736	82.079	79.604	82.018	86.854		157.52	32.995	297.2	25.35	97.8	14.189	39.093		299.69	299.69	451.56	39.093	23.821	202.93	103.77	83.46	134.51	31.792
	149.83	107.73	74.246	62.391	43.108	64.732	95.462		135.23	39.628	274.11	27.554	94.726	18.054	36.868		300.94	300.94	430.64	36.868	23.593	199.61	108.23	71.969	137.87	36.231
	187.77	114.31	73.7	45.832	25.136	47.121	94.331		119.13	51.475	246.99	30.057	84.507	24.012	33.358		291.02	291.02	381.27	33.358	23.849	187.1	116.45	58.079	146.05	43.13
	229.47	120.48	72.055	38.986	16.642	31.957	86.422		108.69	66.607	219.98	32.258	71.269	31.179	30.398		274.4	274.4	317.39	30.398	24.807	171.61	131.88	44.441	155.35	52.223
	262.36	127.03	69.034	44.659	14.4	22.011	75.705		103.38	83.095	197.2	33.554	59.137	38.669	29.824		255.53	255.53	252.95	29.824	26.686	159.35	157.98	33.705	162.05	63.242
	273.86	135.82	66.197	58.461	15.179	18.899	66.15		102.71	99.008	182.81	33.344	52.238	45.597	33.472		238.86	238.86	201.9	33.472	30.426	156.54	198.2	28.52	162.43	75.92
	255.58	146.32	65.109	76.185	15.75	20.77	61.726		106.01	116.66	178.89	30.467	51.775	53.329	43.8		221.95	221.95	161.39	43.8	35.879	168.18	268.14	31.56	154.49	93.765
	215.9	155.74	67.331	93.622	16.648	25.205	64.983		113.65	137.35	182.68	25.325	54.996	62.454	59.585		201.81	201.81	122.13	59.585	41.639	190.14	365.48	41.059	140.7	116.95
	167.42	161.3	74.427	106.57	20.027	29.786	73.275		126.57	157.58	191.05	19.658	60.099	70.926	77.139		182.14	182.14	88.375	77.139	46.296	214.89	466.86	53.005	124.07	140.23
	122.7	160.23	85.356	114.72	25.084	32.09	82.777		145.75	173.9	200.84	15.209	65.279	76.695	92.769		166.63	166.63	64.405	92.769	48.443	234.94	548.88	63.39	107.62	158.32
	94.338	148.03	97.772	120.88	31.015	31.722	89.666		172.16	182.82	208.93	13.719	68.734	77.715	102.79		158.95	158.95	54.483	102.79	46.848	242.76	588.18	68.204	94.339	165.97
	85.896	126.55	109.33	125.51	37.016	30.294	90.119		214.94	183.22	213.29	16.124	70.985	71.868	106.23		162.79	162.79	65.249	106.23	42.449	231.03	571.75	64.434	83.457	159.77
	51.298	90.309	61.227	33.118	131.65	164.59	25.094		213.04	56.335	362.64	10.902	53.919	21.838	42.021		162.98	162.98	177.31	42.021	37.477	98.936	106.92	92.958	137.86	45.345
	66.678	179.93	60.987	206.39	12.53	93.804	32.064		585.27	61.527	202.07	61.692	43.266	22.984	68.117		143.87	143.87	165.1	68.117	92.056	91.263	188.17	139.59	142.49	31.748
	66.439	213.59	66.917	193.6	19.868	65.744	36.947		522.24	60.232	161.82	71.963	40.156	21.694	63.895		118.9	118.9	176.27	63.895	101.79	69.968	233.03	121.88	137.47	31.06
	67.398	228.92	75.471	168.01	29.234	48.735	44.443		452.14	59.245	128.46	80.555	39.519	20.775	59.885		95.823	95.823	183.35	59.885	104.38	52.616	270.81	103.95	132.17	31.827
	69.53	220.33	84.27	131.02	39.08	44.438	51.205		393.23	58.898	111.69	84.387	40.719	20.593	56.86		79.631	79.631	184.61	56.86	96.8	46.58	289.66	88.9	125.94	34.734
	73.722	195.3	90.933	90.308	47.857	48	53.889		339.18	59.639	113.94	82.615	45.854	21.613	55.059		70.321	70.321	175.13	55.059	81.489	56.395	284.44	75.001	116.96	41.673
	79.991	162.21	93.083	53.538	54.467	56.935	51.39		277.83	61.246	128.73	77.292	55.348	23.59	53.97		64.563	64.563	156.06	53.97	62.98	77.145	263.04	60.164	105.65	52.185
	87.005	129.42	88.64	28.382	59.941	68.754	45.94		218.67	63.048	152.43	69.685	66.053	25.827	53.229		62.365	62.365	134.78	53.229	45.809	102.03	233.18	47.008	94.764	63.437
	93.437	105.3	79.192	16.756	65.929	80.969	39.193		171.17	64.372	181.4	61.06	74.824	27.628	52.475		63.731	63.731	118.68	52.475	34.511	124.25	202.58	38.152	87.024	72.591
	97.956	88.308	67.855	13.549	74.079	96.74	32.802		144.81	64.546	212.01	52.682	78.514	28.296	51.347		68.668	68.668	115.17	51.347	30.156	136.99	178.95	36.214	85.165	76.813
	97.166	72.861	57.745	15.882	86.043	117.72	28.421		150.03	63.658	250.03	43.314	74.344	27.357	49.632		78.016	78.016	124.77	49.632	29.722	136.51	162.39	45.018	92.886	74.497
	91.954	61.282	51.979	20.88	106.88	139.18	25.445		180.49	62.154	297.89	32.112	64.411	25.275	47.573		91.773	91.773	142.56	47.573	31.601	127.35	147.75	62.818	108.36	67.533
	87.414	55.897	51.369	25.665	135.48	156.38	22.771		220.57	59.906	346.92	20.933	52.886	22.761	45.485		108.68	108.68	167.73	45.485	34.188	115.13	134.89	83.88	126.05	58.33
	88.639	59.029	53.838	32.407	164.27	164.57	21.307		254.62	56.782	388.46	11.633	43.937	20.529	43.686		127.46	127.46	199.48	43.686	35.875	105.47	123.65	102.47	140.41	49.294
	100.72	76.211	58.167	43.024	185.66	161.8	21.961		267.01	52.652	413.86	6.0685	41.734	19.29	42.492		146.86	146.86	236.99	42.492	36.733	104.01	113.87	112.84	145.88	42.835
	131.2	105.89	63.136	54.261	192.05	151.22	25.64		250.75	45.014	421.17	5.3143	50.313	18.858	42.161		171.4	171.4	293.63	42.161	37.832	114.23	105.22	113.4	137.55	38.215
	176.68	139.78	67.524	62.865	177.42	135.78	34.639		216.26	33.954	416.16	8.1327	66.892	18.758	42.483		201.9	201.9	369.93	42.483	39.068	132.38	97.814	107.94	119.11	33.828
	225.85	169.56	72.289	65.581	146.84	118.41	48.351		174.03	23.227	401.76	12.912	85.421	19.269	43.07		231.61	231.61	445.86	43.07	40.336	153.23	92.138	98.915	97.954	30.78
	267.41	186.96	78.243	58.56	109.33	102.05	63.337		134.53	16.585	380.86	18.04	99.849	20.67	43.534		253.76	253.76	501.37	43.534	41.534	171.55	88.694	88.734	81.457	30.177
	290.07	188.73	83.953	43.97	73.938	84.565	76.157		108.25	17.782	356.38	21.905	104.13	23.242	43.489		261.59	261.59	516.41	43.489	43.022	182.11	87.982	79.826	77.004	33.124
	288.93	180.43	87.982	27.587	49.699	64.013	83.372		96.661	28.924	322.71	24.866	93.995	26.973	42.217		249.17	249.17	474.69	42.217	44.872	179.98	87.52	70.985	91.204	40.008
	271.54	166.87	88.895	15.186	38.758	43.568	82.799		92.777	47.51	277.91	27.998	73.487	31.679	39.978		221	221	389.58	39.978	46.538	168.63	86.975	60.594	119.13	50.094
	245.22	152.89	83.925	12.542	35.09	26.409	76.73		94.383	70.378	230.4	30.762	48.991	37.373	37.845		185.99	185.99	285.51	37.845	47.477	155.48	90.07	50.463	150.88	62.798
	217.27	143.32	74.027	22.624	35.477	15.713	68.441		99.264	94.368	188.57	32.62	26.894	44.069	36.894		153.03	153.03	186.91	36.894	47.144	147.93	100.53	42.399	176.54	77.539
	195.02	138.67	63.354	41.582	36.701	13.915	61.205		105.2	116.32	160.86	33.033	13.584	51.778	38.198		131.02	131.02	118.21	38.198	44.853	153.39	122.07	38.212	186.19	93.736
	175.29	135.74	56.061	64.963	35.543	18.897	58.297		109.21	138.74	148.72	31.216	11.065	63.158	42.143		121.21	121.21	83.057	42.143	40.969	179.57	163.55	39.912	174.84	116.16
	110.99	115.43	47.092	180.38	26.547	183.26	109.27		267.78	52.487	302.12	57.068	116.54	25.96	73.316		181.07	181.07	69.011	73.316	51.506	83.607	157.65	141.81	183.46	40.904
	99.093	111.95	45.219	187.95	14.634	189.59	92.23		395.2	56.082	302.82	50.84	96.619	25.543	75.369		200.23	200.23	93.432	75.369	57.26	96.205	142.27	149.04	168.58	36.879
	87.154	112.07	45.622	195.56	7.5915	186.12	72.211		504.69	60.325	298.8	46.185	77.933	25.065	76.544		214.9	214.9	117.1	76.544	62.647	106.22	131.82	152.87	153.95	33.601
	78.961	119.31	47.794	203.57	3.7808	167.19	54.127		567.03	62.251	287.33	44.96	63.495	24.622	76.218		217.17	217.17	133.76	76.218	68.851	109.57	132.57	151.69	143.65	31.15
	74.419	133.35	51.231	208.63	1.5651	135.41	42.888		571.05	61.572	262.3	49	53.054	24.112	73.767		202.88	202.88	142.76	73.767	76.251	102.3	150.9	143.61	138.77	29.088
	71.005	148.88	55.426	207.41	1.4927	99.252	40.515		536.21	60.266	225.51	57.068	44.601	23.47	69.606		177.29	177.29	148.27	69.606	83.07	87.126	182.67	129.7	136.62	27.359
	68.861	160.63	62.137	196.54	4.6552	67.204	43.734		479.28	58.764	186.14	66.411	38.514	22.85	64.671		146.65	146.65	151.27	64.671	87.527	69.989	218.26	112.8	135.52	26.624
	68.128	163.3	71.702	170.15	10.23	47.753	49.513		417.06	57.494	153.38	74.275	35.17	22.407	59.9		117.21	117.21	152.73	59.9	87.845	56.812	248.04	95.758	133.79	27.542
	68.95	153.97	81.483	130.47	17.394	43.045	54.823		366.33	56.887	136.41	77.907	34.945	22.297	56.229		95.2	95.2	153.62	56.229	82.144	53.526	262.4	81.41	129.77	30.773
	71.57	136.17	88.843	86.321	25.325	47.421	56.631		321.91	57.214	137.66	76.584	40.346	22.766	53.799		79.904	79.904	151.8	53.799	71.611	64.515	256.72	67.864	121.2	38.339
	75.893	114.29	91.145	46.528	33.049	57.665	54.13		272.64	58.19	151	72.139	51.121	23.712	51.985		67.156	67.156	146.61	51.985	59.063	85.827	237.41	53.227	109.2	49.8
	81.554	92.689	85.938	19.912	41.115	70.561	49.341		226.24	59.405	172.79	65.661	63.511	24.764	50.577		58.046	58.046	141.29	50.577	47.318	110.88	211.41	40.338	97.143	62.123
	88.185	75.764	74.982	8.5903	50.983	82.891	43.475		190.44	60.452	199.4	58.236	73.757	25.55	49.363		53.663	53.663	139.07	49.363	39.192	133.11	185.63	32.035	88.393	72.274
	95.418	61.848	61.95	6.6815	64.114	97.362	37.743		172.99	60.923	227.16	50.954	78.1	25.702	48.133		55.098	55.098	143.17	48.133	35.309	145.91	167.02	31.156	86.318	77.221
	103.34	48.021	50.516	11.009	81.969	116.12	33.356		184.33	61.175	261.54	42.69	73.424	24.961	46.883		63.642	63.642	152.55	46.883	33.793	145.44	156.68	41.892	94.6	75.339
	112.2	36.777	44.352	18.396	111.42	135.1	29.287		219.31	61.479	304.97	32.718	62.234	23.574	45.752		78.569	78.569	165.03	45.752	33.705	136.07	150.01	62.352	110.99	68.651
	121.86	30.61	44.796	25.666	151.5	150.25	24.727		262.25	61.3	349.26	22.725	49.206	21.928	44.747		97.941	97.941	182.22	44.747	34.11	123.61	145.31	86.248	129.97	59.592
	132.2	32.015	49.398	35.451	191.9	157.51	21.219		297.45	60.103	386.24	14.397	39.013	20.409	43.875		119.82	119.82	205.72	43.875	34.072	113.85	140.93	107.29	146.03	50.6
	143.08	45.041	56.154	49.87	222.29	155.31	20.305		309.24	57.353	407.72	9.4194	36.332	19.404	43.143		142.27	142.27	237.13	43.143	33.574	112.6	135.17	119.2	153.63	44.111
	155.24	68.026	63.06	64.973	232.36	146.36	23.527		289.85	50.628	411.2	8.7545	45.24	18.576	42.662		169.78	169.78	289.08	42.662	33.241	123.71	126.53	120.24	148.81	39.432
	168.79	94.894	68.115	76.812	214.19	133.01	33.725		249.73	40.285	402.13	11.278	62.622	17.667	42.429		203.65	203.65	360.51	42.429	33.096	143.33	116.12	114.58	135.23	34.938
	182.59	119.57	71.55	81.438	174.65	117.59	49.872		200.54	29.956	384.28	15.547	82.358	17.183	42.274		237.14	237.14	432.46	42.274	33.165	165.66	106.22	104.85	118.87	31.669
	195.53	135.99	74.701	74.69	125.64	102.46	67.706		153.92	23.273	361.37	20.12	98.332	17.629	42.028		263.48	263.48	485.97	42.028	33.472	184.88	99.098	93.658	105.71	30.665
	206.47	142.26	77.219	59.202	79.027	85.393	82.966		121.54	23.868	337.16	23.552	104.42	19.512	41.523		275.94	275.94	502.07	41.523	34.202	195.22	97.036	83.62	101.72	32.965
	217.54	142.44	78.753	41.213	46.695	64.822	91.391		104.59	33.564	307.21	26.214	96.748	22.928	39.848		269.7	269.7	466.73	39.848	35.339	191.68	97.302	73.168	111.86	38.805
	229.5	139.34	78.952	26.964	30.744	44.081	90.412		95.304	49.942	269.03	29.068	79.382	27.539	37.117		249.26	249.26	392.6	37.117	36.605	178.15	98.378	60.56	132.17	47.492
	239.15	135.79	76.053	22.695	23.254	26.504	82.869		91.88	70.264	229.27	31.56	58.157	33.201	34.694		221.83	221.83	300.72	34.694	37.723	162.07	104.36	48.146	155.18	58.672
	243.3	134.62	70.288	31.456	21.075	15.422	72.617		92.516	91.792	194.57	33.133	38.904	39.77	33.941		194.65	194.65	212.13	33.941	38.415	150.91	119.35	38.276	173.42	71.99
	238.78	137.06	64.304	49.085	21.057	13.121	63.511		95.408	111.79	171.58	33.233	27.454	47.102	36.222		174.92	174.92	147.87	36.222	38.643	152.1	147.44	33.303	179.43	87.092
	219.59	141.24	60.748	71.011	20.05	17.378	59.404		98.133	132.71	161.99	30.914	25.6	57.531	42.864		162.36	162.36	108.98	42.864	38.592	172.43	200.36	35.627	169.5	108.49
	187.85	145.28	62.265	92.659	17.802	24.768	62.699		101.89	156.39	161.37	26.546	29.456	71.154	52.956		152.15	152.15	81.428	52.956	38.319	206.92	275.39	43.682	148.59	136.42
	152.56	147.35	71.373	109.46	16.414	31.862	70.828		110.32	179.13	167.18	21.548	36.33	84.468	64.511		144.73	144.73	63.663	64.511	37.881	245.41	354.92	53.865	122.28	164.11
	122.68	145.57	86.308	121.86	16.263	35.236	80.185		127.06	197.25	176.88	17.34	43.531	93.974	75.538		140.54	140.54	54.125	75.538	37.337	277.78	421.36	62.57	96.178	184.8
	107.19	137.48	103.29	132.91	17.725	33.91	87.167		155.74	207.06	187.92	15.34	48.369	96.172	84.049		140.03	140.03	51.256	84.049	36.507	293.85	457.09	66.193	75.852	191.72
	111.82	124.3	118.55	141.93	21.177	30.169	88.17		207.5	207.4	202.57	16.018	51.233	87.811	90.436		146.53	146.53	59.574	90.436	35.351	285.25	454.22	61.841	59.864	179.6
	89.159	171.91	77.634	111.36	154.8	118.57	103.09		91.405	86.679	318.91	61.504	146.75	23.43	55.679		165.18	165.18	74.291	55.679	26.929	106.64	175.36	104.64	161.64	65.369
	116.64	151.52	68.421	120.62	116.63	129.21	114.7		92.88	65.72	329.06	58.861	140.63	25.358	59.52		158.91	158.91	54.149	59.52	28.859	110.19	173.33	113.66	182.41	59.282
	132.28	142.8	61.027	129.86	81.35	141.26	122.55		114.19	52.139	335.08	55.978	132.98	26.501	62.821		160.33	160.33	45.715	62.821	34.74	110.53	170.96	120.72	192.88	53.865
	133.12	140.44	55.223	139.02	53.956	155.03	124		168.78	47.974	337.41	52.043	122.62	26.602	65.974		176.25	176.25	53.667	65.974	44.333	107.69	166.2	126.64	189.76	48.64
	124.64	141.28	50.78	148.03	35.206	167.15	115.91		250.96	50.177	336.88	46.998	109.28	25.993	69.343		205.49	205.49	73.61	69.343	55.286	104.67	158.02	132.22	177.47	42.713
	111.3	142.13	47.614	156.84	21.776	174.24	100.07		340.57	55.691	332.82	42.057	94.723	25.062	72.343		237.85	237.85	98.529	72.343	65.248	101.44	149.49	136.22	160.97	36.797
	97.553	139.82	45.876	168.8	12.523	172.91	81.147		417.44	61.455	324.53	38.435	80.711	24.193	74.39		263.17	263.17	121.41	74.39	71.87	97.965	143.7	137.42	145.17	31.609
	87.846	134.1	45.695	183.95	6.3051	158.37	63.827		461.43	64.413	311.33	37.349	69.011	23.773	74.896		271.25	271.25	135.24	74.896	74.751	94.194	143.74	134.59	135.03	27.864
	81.928	127.07	47.2	197.26	1.9799	132.88	52.788		464.37	64.223	288.17	40.096	58.802	23.969	73.364		256.91	256.91	136.87	73.364	75.459	88.365	153.22	126.06	132.27	25.168
	76.831	119.14	50.519	203.71	-0.21207	103.62	49.777		439.72	62.924	255.52	45.866	48.908	24.525	70.184		226.92	226.92	130.99	70.184	74.592	80.502	170.08	112.65	133.6	23.045
	72.936	110.68	57.825	198.27	0.49061	77.789	51.675		399.69	61.028	220.94	52.712	40.559	25.188	66.104		189.09	189.09	122.3	66.104	72.751	73.259	188.91	96.865	136.43	22.084
	70.619	102.09	69.032	174.73	3.7273	62.577	55.859		356.5	59.046	191.99	58.684	34.984	25.706	61.872		151.21	151.21	115.52	61.872	70.534	69.285	204.27	81.194	138.15	22.876
	70.26	93.063	80.881	136.43	9.1376	60.217	59.71		322.37	57.49	176.25	61.834	33.413	25.828	58.236		121.08	121.08	115.36	58.236	67.583	71.231	210.74	68.138	136.14	26.009
	71.563	83.349	90.113	92.709	16.361	65.915	60.605		293.39	56.117	175.94	61.871	38.528	25.434	55.02		96.396	96.396	123.64	55.02	63.499	82.517	204.94	55.84	127.61	33.465
	74.275	73.391	93.47	52.865	24.525	76.321	57.9		261.4	54.587	186.01	60.094	49.508	24.69	51.725		71.965	71.965	137.23	51.725	58.818	101.38	190.48	42.634	114.28	44.849
	78.84	63.636	88.232	26.215	33.869	88.084	53.343		232.28	53.263	203.13	56.94	62.331	23.778	48.616		51.233	51.233	153.38	48.616	54.081	122.68	172.44	31.307	100.38	57.192
	85.704	54.53	76.571	14.383	45.704	97.854	47.9		211.93	52.509	223.97	52.846	72.978	22.879	45.955		37.65	37.65	169.35	45.955	49.825	141.29	155.9	24.646	90.112	67.524
	95.311	44.404	62.567	11.161	61.336	107.07	42.538		206.22	52.69	245.23	48.249	77.425	22.176	44.005		34.663	34.663	182.42	44.005	45.944	152.09	145.92	25.437	87.699	72.875
	110.87	32.96	50.3	14.112	82.074	117.98	38.224		225.1	54.799	271.4	42.127	72.535	21.766	43.035		45.227	45.227	189.11	43.035	42.077	151.58	144.93	38.1	96.893	71.802
	132.09	22.703	43.852	20.8	115.73	128.4	33.809		264.62	58.59	304.72	34.189	60.989	21.53	42.867		67.04	67.04	191.26	42.867	38.387	143.17	149.56	60.777	114.88	66.285
	154.15	16.134	44.875	28.79	161.42	136.18	28.649		309.91	62.578	338.4	25.968	47.494	21.318	43.102		95.675	95.675	194.05	43.102	35.034	132.11	156.15	86.839	136.04	58.488
	172.24	15.758	50.647	41.512	207.44	139.14	24.466		346.05	65.275	365.66	18.996	36.759	20.98	43.339		126.7	126.7	202.68	43.339	32.18	123.66	161.09	109.66	154.73	50.579
	181.53	23.982	58.691	60.59	242.08	136.44	22.982		358.16	65.191	379.72	14.804	33.493	20.369	43.18		155.7	155.7	222.35	43.18	29.816	123.07	160.73	122.61	165.33	44.722
	176.62	39.137	66.529	80.879	253.64	129.53	25.921		338.27	60.041	377.61	14.139	41.185	18.811	42.596		186.31	186.31	263.74	42.596	27.837	134.09	151.51	123.75	165.17	40.249
	160.71	57.612	71.683	97.233	233.05	119.67	36.244		296.29	50.817	363.87	15.978	56.696	16.408	41.854		221.48	221.48	323.39	41.854	26.252	153.23	135.85	117.52	157.99	35.715
	141.93	75.796	73.872	104.51	188.14	108.14	52.802		244.2	40.948	342.92	19.204	74.792	14.165	40.995		255.74	255.74	385.27	40.995	25.073	174.84	119.1	106.8	147.81	32.125
	128.4	90.078	74.75	98.313	132.47	96.204	71.153		193.95	33.864	319.22	22.701	90.238	13.09	40.061		283.64	283.64	433.34	40.061	24.311	193.29	106.62	94.481	138.65	30.483
	128.24	99.92	74.736	82.079	79.604	82.018	86.854		157.52	32.995	297.2	25.35	97.8	14.189	39.093		299.69	299.69	451.56	39.093	23.821	202.93	103.77	83.46	134.51	31.792
	149.83	107.73	74.246	62.391	43.108	64.732	95.462		135.23	39.628	274.11	27.554	94.726	18.054	36.868		300.94	300.94	430.64	36.868	23.593	199.61	108.23	71.969	137.87	36.231
	187.77	114.31	73.7	45.832	25.136	47.121	94.331		119.13	51.475	246.99	30.057	84.507	24.012	33.358		291.02	291.02	381.27	33.358	23.849	187.1	116.45	58.079	146.05	43.13
	229.47	120.48	72.055	38.986	16.642	31.957	86.422		108.69	66.607	219.98	32.258	71.269	31.179	30.398		274.4	274.4	317.39	30.398	24.807	171.61	131.88	44.441	155.35	52.223
	262.36	127.03	69.034	44.659	14.4	22.011	75.705		103.38	83.095	197.2	33.554	59.137	38.669	29.824		255.53	255.53	252.95	29.824	26.686	159.35	157.98	33.705	162.05	63.242
	273.86	135.82	66.197	58.461	15.179	18.899	66.15		102.71	99.008	182.81	33.344	52.238	45.597	33.472		238.86	238.86	201.9	33.472	30.426	156.54	198.2	28.52	162.43	75.92
	255.58	146.32	65.109	76.185	15.75	20.77	61.726		106.01	116.66	178.89	30.467	51.775	53.329	43.8		221.95	221.95	161.39	43.8	35.879	168.18	268.14	31.56	154.49	93.765
	215.9	155.74	67.331	93.622	16.648	25.205	64.983		113.65	137.35	182.68	25.325	54.996	62.454	59.585		201.81	201.81	122.13	59.585	41.639	190.14	365.48	41.059	140.7	116.95
	167.42	161.3	74.427	106.57	20.027	29.786	73.275		126.57	157.58	191.05	19.658	60.099	70.926	77.139		182.14	182.14	88.375	77.139	46.296	214.89	466.86	53.005	124.07	140.23
	122.7	160.23	85.356	114.72	25.084	32.09	82.777		145.75	173.9	200.84	15.209	65.279	76.695	92.769		166.63	166.63	64.405	92.769	48.443	234.94	548.88	63.39	107.62	158.32
	94.338	148.03	97.772	120.88	31.015	31.722	89.666		172.16	182.82	208.93	13.719	68.734	77.715	102.79		158.95	158.95	54.483	102.79	46.848	242.76	588.18	68.204	94.339	165.97
	85.896	126.55	109.33	125.51	37.016	30.294	90.119		214.94	183.22	213.29	16.124	70.985	71.868	106.23		162.79	162.79	65.249	106.23	42.449	231.03	571.75	64.434	83.457	159.77
	51.298	90.309	61.227	33.118	131.65	164.59	25.094		213.04	56.335	362.64	10.902	53.919	21.838	42.021		162.98	162.98	177.31	42.021	37.477	98.936	106.92	92.958	137.86	45.345
	66.678	179.93	60.987	206.39	12.53	93.804	32.064		585.27	61.527	202.07	61.692	43.266	22.984	68.117		143.87	143.87	165.1	68.117	92.056	91.263	188.17	139.59	142.49	31.748
	66.439	213.59	66.917	193.6	19.868	65.744	36.947		522.24	60.232	161.82	71.963	40.156	21.694	63.895		118.9	118.9	176.27	63.895	101.79	69.968	233.03	121.88	137.47	31.06
	67.398	228.92	75.471	168.01	29.234	48.735	44.443		452.14	59.245	128.46	80.555	39.519	20.775	59.885		95.823	95.823	183.35	59.885	104.38	52.616	270.81	103.95	132.17	31.827
	69.53	220.33	84.27	131.02	39.08	44.438	51.205		393.23	58.898	111.69	84.387	40.719	20.593	56.86		79.631	79.631	184.61	56.86	96.8	46.58	289.66	88.9	125.94	34.734
	73.722	195.3	90.933	90.308	47.857	48	53.889		339.18	59.639	113.94	82.615	45.854	21.613	55.059		70.321	70.321	175.13	55.059	81.489	56.395	284.44	75.001	116.96	41.673
	79.991	162.21	93.083	53.538	54.467	56.935	51.39		277.83	61.246	128.73	77.292	55.348	23.59	53.97		64.563	64.563	156.06	53.97	62.98	77.145	263.04	60.164	105.65	52.185
	87.005	129.42	88.64	28.382	59.941	68.754	45.94		218.67	63.048	152.43	69.685	66.053	25.827	53.229		62.365	62.365	134.78	53.229	45.809	102.03	233.18	47.008	94.764	63.437
	93.437	105.3	79.192	16.756	65.929	80.969	39.193		171.17	64.372	181.4	61.06	74.824	27.628	52.475		63.731	63.731	118.68	52.475	34.511	124.25	202.58	38.152	87.024	72.591
	97.956	88.308	67.855	13.549	74.079	96.74	32.802		144.81	64.546	212.01	52.682	78.514	28.296	51.347		68.668	68.668	115.17	51.347	30.156	136.99	178.95	36.214	85.165	76.813
	97.166	72.861	57.745	15.882	86.043	117.72	28.421		150.03	63.658	250.03	43.314	74.344	27.357	49.632		78.016	78.016	124.77	49.632	29.722	136.51	162.39	45.018	92.886	74.497
	91.954	61.282	51.979	20.88	106.88	139.18	25.445		180.49	62.154	297.89	32.112	64.411	25.275	47.573		91.773	91.773	142.56	47.573	31.601	127.35	147.75	62.818	108.36	67.533
	87.414	55.897	51.369	25.665	135.48	156.38	22.771		220.57	59.906	346.92	20.933	52.886	22.761	45.485		108.68	108.68	167.73	45.485	34.188	115.13	134.89	83.88	126.05	58.33
	88.639	59.029	53.838	32.407	164.27	164.57	21.307		254.62	56.782	388.46	11.633	43.937	20.529	43.686		127.46	127.46	199.48	43.686	35.875	105.47	123.65	102.47	140.41	49.294
	100.72	76.211	58.167	43.024	185.66	161.8	21.961		267.01	52.652	413.86	6.0685	41.734	19.29	42.492		146.86	146.86	236.99	42.492	36.733	104.01	113.87	112.84	145.88	42.835
	131.2	105.89	63.136	54.261	192.05	151.22	25.64		250.75	45.014	421.17	5.3143	50.313	18.858	42.161		171.4	171.4	293.63	42.161	37.832	114.23	105.22	113.4	137.55	38.215
	176.68	139.78	67.524	62.865	177.42	135.78	34.639		216.26	33.954	416.16	8.1327	66.892	18.758	42.483		201.9	201.9	369.93	42.483	39.068	132.38	97.814	107.94	119.11	33.828
	225.85	169.56	72.289	65.581	146.84	118.41	48.351		174.03	23.227	401.76	12.912	85.421	19.269	43.07		231.61	231.61	445.86	43.07	40.336	153.23	92.138	98.915	97.954	30.78
	267.41	186.96	78.243	58.56	109.33	102.05	63.337		134.53	16.585	380.86	18.04	99.849	20.67	43.534		253.76	253.76	501.37	43.534	41.534	171.55	88.694	88.734	81.457	30.177
	290.07	188.73	83.953	43.97	73.938	84.565	76.157		108.25	17.782	356.38	21.905	104.13	23.242	43.489		261.59	261.59	516.41	43.489	43.022	182.11	87.982	79.826	77.004	33.124
	288.93	180.43	87.982	27.587	49.699	64.013	83.372		96.661	28.924	322.71	24.866	93.995	26.973	42.217		249.17	249.17	474.69	42.217	44.872	179.98	87.52	70.985	91.204	40.008
	271.54	166.87	88.895	15.186	38.758	43.568	82.799		92.777	47.51	277.91	27.998	73.487	31.679	39.978		221	221	389.58	39.978	46.538	168.63	86.975	60.594	119.13	50.094
	245.22	152.89	83.925	12.542	35.09	26.409	76.73		94.383	70.378	230.4	30.762	48.991	37.373	37.845		185.99	185.99	285.51	37.845	47.477	155.48	90.07	50.463	150.88	62.798
	217.27	143.32	74.027	22.624	35.477	15.713	68.441		99.264	94.368	188.57	32.62	26.894	44.069	36.894		153.03	153.03	186.91	36.894	47.144	147.93	100.53	42.399	176.54	77.539
	195.02	138.67	63.354	41.582	36.701	13.915	61.205		105.2	116.32	160.86	33.033	13.584	51.778	38.198		131.02	131.02	118.21	38.198	44.853	153.39	122.07	38.212	186.19	93.736
	175.29	135.74	56.061	64.963	35.543	18.897	58.297		109.21	138.74	148.72	31.216	11.065	63.158	42.143		121.21	121.21	83.057	42.143	40.969	179.57	163.55	39.912	174.84	116.16
	110.99	115.43	47.092	180.38	26.547	183.26	109.27		267.78	52.487	302.12	57.068	116.54	25.96	73.316		181.07	181.07	69.011	73.316	51.506	83.607	157.65	141.81	183.46	40.904
	99.093	111.95	45.219	187.95	14.634	189.59	92.23		395.2	56.082	302.82	50.84	96.619	25.543	75.369		200.23	200.23	93.432	75.369	57.26	96.205	142.27	149.04	168.58	36.879
	87.154	112.07	45.622	195.56	7.5915	186.12	72.211		504.69	60.325	298.8	46.185	77.933	25.065	76.544		214.9	214.9	117.1	76.544	62.647	106.22	131.82	152.87	153.95	33.601
	78.961	119.31	47.794	203.57	3.7808	167.19	54.127		567.03	62.251	287.33	44.96	63.495	24.622	76.218		217.17	217.17	133.76	76.218	68.851	109.57	132.57	151.69	143.65	31.15
	74.419	133.35	51.231	208.63	1.5651	135.41	42.888		571.05	61.572	262.3	49	53.054	24.112	73.767		202.88	202.88	142.76	73.767	76.251	102.3	150.9	143.61	138.77	29.088
	71.005	148.88	55.426	207.41	1.4927	99.252	40.515		536.21	60.266	225.51	57.068	44.601	23.47	69.606		177.29	177.29	148.27	69.606	83.07	87.126	182.67	129.7	136.62	27.359
	68.861	160.63	62.137	196.54	4.6552	67.204	43.734		479.28	58.764	186.14	66.411	38.514	22.85	64.671		146.65	146.65	151.27	64.671	87.527	69.989	218.26	112.8	135.52	26.624
	68.128	163.3	71.702	170.15	10.23	47.753	49.513		417.06	57.494	153.38	74.275	35.17	22.407	59.9		117.21	117.21	152.73	59.9	87.845	56.812	248.04	95.758	133.79	27.542
	68.95	153.97	81.483	130.47	17.394	43.045	54.823		366.33	56.887	136.41	77.907	34.945	22.297	56.229		95.2	95.2	153.62	56.229	82.144	53.526	262.4	81.41	129.77	30.773
	71.57	136.17	88.843	86.321	25.325	47.421	56.631		321.91	57.214	137.66	76.584	40.346	22.766	53.799		79.904	79.904	151.8	53.799	71.611	64.515	256.72	67.864	121.2	38.339
	75.893	114.29	91.145	46.528	33.049	57.665	54.13		272.64	58.19	151	72.139	51.121	23.712	51.985		67.156	67.156	146.61	51.985	59.063	85.827	237.41	53.227	109.2	49.8
	81.554	92.689	85.938	19.912	41.115	70.561	49.341		226.24	59.405	172.79	65.661	63.511	24.764	50.577		58.046	58.046	141.29	50.577	47.318	110.88	211.41	40.338	97.143	62.123
	88.185	75.764	74.982	8.5903	50.983	82.891	43.475		190.44	60.452	199.4	58.236	73.757	25.55	49.363		53.663	53.663	139.07	49.363	39.192	133.11	185.63	32.035	88.393	72.274
	95.418	61.848	61.95	6.6815	64.114	97.362	37.743		172.99	60.923	227.16	50.954	78.1	25.702	48.133		55.098	55.098	143.17	48.133	35.309	145.91	167.02	31.156	86.318	77.221
	103.34	48.021	50.516	11.009	81.969	116.12	33.356		184.33	61.175	261.54	42.69	73.424	24.961	46.883		63.642	63.642	152.55	46.883	33.793	145.44	156.68	41.892	94.6	75.339
	112.2	36.777	44.352	18.396	111.42	135.1	29.287		219.31	61.479	304.97	32.718	62.234	23.574	45.752		78.569	78.569	165.03	45.752	33.705	136.07	150.01	62.352	110.99	68.651
	121.86	30.61	44.796	25.666	151.5	150.25	24.727		262.25	61.3	349.26	22.725	49.206	21.928	44.747		97.941	97.941	182.22	44.747	34.11	123.61	145.31	86.248	129.97	59.592
	132.2	32.015	49.398	35.451	191.9	157.51	21.219		297.45	60.103	386.24	14.397	39.013	20.409	43.875		119.82	119.82	205.72	43.875	34.072	113.85	140.93	107.29	146.03	50.6
	143.08	45.041	56.154	49.87	222.29	155.31	20.305		309.24	57.353	407.72	9.4194	36.332	19.404	43.143		142.27	142.27	237.13	43.143	33.574	112.6	135.17	119.2	153.63	44.111
	155.24	68.026	63.06	64.973	232.36	146.36	23.527		289.85	50.628	411.2	8.7545	45.24	18.576	42.662		169.78	169.78	289.08	42.662	33.241	123.71	126.53	120.24	148.81	39.432
	168.79	94.894	68.115	76.812	214.19	133.01	33.725		249.73	40.285	402.13	11.278	62.622	17.667	42.429		203.65	203.65	360.51	42.429	33.096	143.33	116.12	114.58	135.23	34.938
	182.59	119.57	71.55	81.438	174.65	117.59	49.872		200.54	29.956	384.28	15.547	82.358	17.183	42.274		237.14	237.14	432.46	42.274	33.165	165.66	106.22	104.85	118.87	31.669
	195.53	135.99	74.701	74.69	125.64	102.46	67.706		153.92	23.273	361.37	20.12	98.332	17.629	42.028		263.48	263.48	485.97	42.028	33.472	184.88	99.098	93.658	105.71	30.665
	206.47	142.26	77.219	59.202	79.027	85.393	82.966		121.54	23.868	337.16	23.552	104.42	19.512	41.523		275.94	275.94	502.07	41.523	34.202	195.22	97.036	83.62	101.72	32.965
	217.54	142.44	78.753	41.213	46.695	64.822	91.391		104.59	33.564	307.21	26.214	96.748	22.928	39.848		269.7	269.7	466.73	39.848	35.339	191.68	97.302	73.168	111.86	38.805
	229.5	139.34	78.952	26.964	30.744	44.081	90.412		95.304	49.942	269.03	29.068	79.382	27.539	37.117		249.26	249.26	392.6	37.117	36.605	178.15	98.378	60.56	132.17	47.492
	239.15	135.79	76.053	22.695	23.254	26.504	82.869		91.88	70.264	229.27	31.56	58.157	33.201	34.694		221.83	221.83	300.72	34.694	37.723	162.07	104.36	48.146	155.18	58.672
	243.3	134.62	70.288	31.456	21.075	15.422	72.617		92.516	91.792	194.57	33.133	38.904	39.77	33.941		194.65	194.65	212.13	33.941	38.415	150.91	119.35	38.276	173.42	71.99
	238.78	137.06	64.304	49.085	21.057	13.121	63.511		95.408	111.79	171.58	33.233	27.454	47.102	36.222		174.92	174.92	147.87	36.222	38.643	152.1	147.44	33.303	179.43	87.092
	219.59	141.24	60.748	71.011	20.05	17.378	59.404		98.133	132.71	161.99	30.914	25.6	57.531	42.864		162.36	162.36	108.98	42.864	38.592	172.43	200.36	35.627	169.5	108.49
	187.85	145.28	62.265	92.659	17.802	24.768	62.699		101.89	156.39	161.37	26.546	29.456	71.154	52.956		152.15	152.15	81.428	52.956	38.319	206.92	275.39	43.682	148.59	136.42
	152.56	147.35	71.373	109.46	16.414	31.862	70.828		110.32	179.13	167.18	21.548	36.33	84.468	64.511		144.73	144.73	63.663	64.511	37.881	245.41	354.92	53.865	122.28	164.11
	122.68	145.57	86.308	121.86	16.263	35.236	80.185		127.06	197.25	176.88	17.34	43.531	93.974	75.538		140.54	140.54	54.125	75.538	37.337	277.78	421.36	62.57	96.178	184.8
	107.19	137.48	103.29	132.91	17.725	33.91	87.167		155.74	207.06	187.92	15.34	48.369	96.172	84.049		140.03	140.03	51.256	84.049	36.507	293.85	457.09	66.193	75.852	191.72
	111.82	124.3	118.55	141.93	21.177	30.169	88.17		207.5	207.4	202.57	16.018	51.233	87.811	90.436		146.53	146.53	59.574	90.436	35.351	285.25	454.22	61.841	59.864	179.6
	89.159	171.91	77.634	111.36	154.8	118.57	103.09		91.405	86.679	318.91	61.504	146.75	23.43	55.679		165.18	165.18	74.291	55.679	26.929	106.64	175.36	104.64	161.64	65.369
	116.64	151.52	68.421	120.62	116.63	129.21	114.7		92.88	65.72	329.06	58.861	140.63	25.358	59.52		158.91	158.91	54.149	59.52	28.859	110.19	173.33	113.66	182.41	59.282
	132.28	142.8	61.027	129.86	81.35	141.26	122.55		114.19	52.139	335.08	55.978	132.98	26.501	62.821		160.33	160.33	45.715	62.821	34.74	110.53	170.96	120.72	192.88	53.865
	133.12	140.44	55.223	139.02	53.956	155.03	124		168.78	47.974	337.41	52.043	122.62	26.602	65.974		176.25	176.25	53.667	65.974	44.333	107.69	166.2	126.64	189.76	48.64
	124.64	141.28	50.78	148.03	35.206	167.15	115.91		250.96	50.177	336.88	46.998	109.28	25.993	69.343		205.49	205.49	73.61	69.343	55.286	104.67	158.02	132.22	177.47	42.713
	111.3	142.13	47.614	156.84	21.776	174.24	100.07		340.57	55.691	332.82	42.057	94.723	25.062	72.343		237.85	237.85	98.529	72.343	65.248	101.44	149.49	136.22	160.97	36.797
	97.553	139.82	45.876	168.8	12.523	172.91	81.147		417.44	61.455	324.53	38.435	80.711	24.193	74.39		263.17	263.17	121.41	74.39	71.87	97.965	143.7	137.42	145.17	31.609
	87.846	134.1	45.695	183.95	6.3051	158.37	63.827		461.43	64.413	311.33	37.349	69.011	23.773	74.896		271.25	271.25	135.24	74.896	74.751	94.194	143.74	134.59	135.03	27.864
	81.928	127.07	47.2	197.26	1.9799	132.88	52.788		464.37	64.223	288.17	40.096	58.802	23.969	73.364		256.91	256.91	136.87	73.364	75.459	88.365	153.22	126.06	132.27	25.168
	76.831	119.14	50.519	203.71	-0.21207	103.62	49.777		439.72	62.924	255.52	45.866	48.908	24.525	70.184		226.92	226.92	130.99	70.184	74.592	80.502	170.08	112.65	133.6	23.045
	72.936	110.68	57.825	198.27	0.49061	77.789	51.675		399.69	61.028	220.94	52.712	40.559	25.188	66.104		189.09	189.09	122.3	66.104	72.751	73.259	188.91	96.865	136.43	22.084
	70.619	102.09	69.032	174.73	3.7273	62.577	55.859		356.5	59.046	191.99	58.684	34.984	25.706	61.872		151.21	151.21	115.52	61.872	70.534	69.285	204.27	81.194	138.15	22.876
	70.26	93.063	80.881	136.43	9.1376	60.217	59.71		322.37	57.49	176.25	61.834	33.413	25.828	58.236		121.08	121.08	115.36	58.236	67.583	71.231	210.74	68.138	136.14	26.009
	71.563	83.349	90.113	92.709	16.361	65.915	60.605		293.39	56.117	175.94	61.871	38.528	25.434	55.02		96.396	96.396	123.64	55.02	63.499	82.517	204.94	55.84	127.61	33.465
	74.275	73.391	93.47	52.865	24.525	76.321	57.9		261.4	54.587	186.01	60.094	49.508	24.69	51.725		71.965	71.965	137.23	51.725	58.818	101.38	190.48	42.634	114.28	44.849
	78.84	63.636	88.232	26.215	33.869	88.084	53.343		232.28	53.263	203.13	56.94	62.331	23.778	48.616		51.233	51.233	153.38	48.616	54.081	122.68	172.44	31.307	100.38	57.192
	85.704	54.53	76.571	14.383	45.704	97.854	47.9		211.93	52.509	223.97	52.846	72.978	22.879	45.955		37.65	37.65	169.35	45.955	49.825	141.29	155.9	24.646	90.112	67.524
	95.311	44.404	62.567	11.161	61.336	107.07	42.538		206.22	52.69	245.23	48.249	77.425	22.176	44.005		34.663	34.663	182.42	44.005	45.944	152.09	145.92	25.437	87.699	72.875
	110.87	32.96	50.3	14.112	82.074	117.98	38.224		225.1	54.799	271.4	42.127	72.535	21.766	43.035		45.227	45.227	189.11	43.035	42.077	151.58	144.93	38.1	96.893	71.802
	132.09	22.703	43.852	20.8	115.73	128.4	33.809		264.62	58.59	304.72	34.189	60.989	21.53	42.867		67.04	67.04	191.26	42.867	38.387	143.17	149.56	60.777	114.88	66.285
	154.15	16.134	44.875	28.79	161.42	136.18	28.649		309.91	62.578	338.4	25.968	47.494	21.318	43.102		95.675	95.675	194.05	43.102	35.034	132.11	156.15	86.839	136.04	58.488
	172.24	15.758	50.647	41.512	207.44	139.14	24.466		346.05	65.275	365.66	18.996	36.759	20.98	43.339		126.7	126.7	202.68	43.339	32.18	123.66	161.09	109.66	154.73	50.579
	181.53	23.982	58.691	60.59	242.08	136.44	22.982		358.16	65.191	379.72	14.804	33.493	20.369	43.18		155.7	155.7	222.35	43.18	29.816	123.07	160.73	122.61	165.33	44.722
	176.62	39.137	66.529	80.879	253.64	129.53	25.921		338.27	60.041	377.61	14.139	41.185	18.811	42.596		186.31	186.31	263.74	42.596	27.837	134.09	151.51	123.75	165.17	40.249
	160.71	57.612	71.683	97.233	233.05	119.67	36.244		296.29	50.817	363.87	15.978	56.696	16.408	41.854		221.48	221.48	323.39	41.854	26.252	153.23	135.85	117.52	157.99	35.715
	141.93	75.796	73.872	104.51	188.14	108.14	52.802		244.2	40.948	342.92	19.204	74.792	14.165	40.995		255.74	255.74	385.27	40.995	25.073	174.84	119.1	106.8	147.81	32.125
	128.4	90.078	74.75	98.313	132.47	96.204	71.153		193.95	33.864	319.22	22.701	90.238	13.09	40.061		283.64	283.64	433.34	40.061	24.311	193.29	106.62	94.481	138.65	30.483
	128.24	99.92	74.736	82.079	79.604	82.018	86.854		157.52	32.995	297.2	25.35	97.8	14.189	39.093		299.69	299.69	451.56	39.093	23.821	202.93	103.77	83.46	134.51	31.792
	149.83	107.73	74.246	62.391	43.108	64.732	95.462		135.23	39.628	274.11	27.554	94.726	18.054	36.868		300.94	300.94	430.64	36.868	23.593	199.61	108.23	71.969	137.87	36.231
	187.77	114.31	73.7	45.832	25.136	47.121	94.331		119.13	51.475	246.99	30.057	84.507	24.012	33.358		291.02	291.02	381.27	33.358	23.849	187.1	116.45	58.079	146.05	43.13
	229.47	120.48	72.055	38.986	16.642	31.957	86.422		108.69	66.607	219.98	32.258	71.269	31.179	30.398		274.4	274.4	317.39	30.398	24.807	171.61	131.88	44.441	155.35	52.223
	262.36	127.03	69.034	44.659	14.4	22.011	75.705		103.38	83.095	197.2	33.554	59.137	38.669	29.824		255.53	255.53	252.95	29.824	26.686	159.35	157.98	33.705	162.05	63.242
	273.86	135.82	66.197	58.461	15.179	18.899	66.15		102.71	99.008	182.81	33.344	52.238	45.597	33.472		238.86	238.86	201.9	33.472	30.426	156.54	198.2	28.52	162.43	75.92
	255.58	146.32	65.109	76.185	15.75	20.77	61.726		106.01	116.66	178.89	30.467	51.775	53.329	43.8		221.95	221.95	161.39	43.8	35.879	168.18	268.14	31.56	154.49	93.765
	215.9	155.74	67.331	93.622	16.648	25.205	64.983		113.65	137.35	182.68	25.325	54.996	62.454	59.585		201.81	201.81	122.13	59.585	41.639	190.14	365.48	41.059	140.7	116.95
	167.42	161.3	74.427	106.57	20.027	29.786	73.275		126.57	157.58	191.05	19.658	60.099	70.926	77.139		182.14	182.14	88.375	77.139	46.296	214.89	466.86	53.005	124.07	140.23
	122.7	160.23	85.356	114.72	25.084	32.09	82.777		145.75	173.9	200.84	15.209	65.279	76.695	92.769		166.63	166.63	64.405	92.769	48.443	234.94	548.88	63.39	107.62	158.32
	94.338	148.03	97.772	120.88	31.015	31.722	89.666		172.16	182.82	208.93	13.719	68.734	77.715	102.79		158.95	158.95	54.483	102.79	46.848	242.76	588.18	68.204	94.339	165.97
	85.896	126.55	109.33	125.51	37.016	30.294	90.119		214.94	183.22	213.29	16.124	70.985	71.868	106.23		162.79	162.79	65.249	106.23	42.449	231.03	571.75	64.434	83.457	159.77
	51.298	90.309	61.227	33.118	131.65	164.59	25.094		213.04	56.335	362.64	10.902	53.919	21.838	42.021		162.98	162.98	177.31	42.021	37.477	98.936	106.92	92.958	137.86	45.345
	66.678	179.93	60.987	206.39	12.53	93.804	32.064		585.27	61.527	202.07	61.692	43.266	22.984	68.117		143.87	143.87	165.1	68.117	92.056	91.263	188.17	139.59	142.49	31.748
	66.439	213.59	66.917	193.6	19.868	65.744	36.947		522.24	60.232	161.82	71.963	40.156	21.694	63.895		118.9	118.9	176.27	63.895	101.79	69.968	233.03	121.88	137.47	31.06
	67.398	228.92	75.471	168.01	29.234	48.735	44.443		452.14	59.245	128.46	80.555	39.519	20.775	59.885		95.823	95.823	183.35	59.885	104.38	52.616	270.81	103.95	132.17	31.827
	69.53	220.33	84.27	131.02	39.08	44.438	51.205		393.23	58.898	111.69	84.387	40.719	20.593	56.86		79.631	79.631	184.61	56.86	96.8	46.58	289.66	88.9	125.94	34.734
	73.722	195.3	90.933	90.308	47.857	48	53.889		339.18	59.639	113.94	82.615	45.854	21.613	55.059		70.321	70.321	175.13	55.059	81.489	56.395	284.44	75.001	116.96	41.673
	79.991	162.21	93.083	53.538	54.467	56.935	51.39		277.83	61.246	128.73	77.292	55.348	23.59	53.97		64.563	64.563	156.06	53.97	62.98	77.145	263.04	60.164	105.65	52.185
	87.005	129.42	88.64	28.382	59.941	68.754	45.94		218.67	63.048	152.43	69.685	66.053	25.827	53.229		62.365	62.365	134.78	53.229	45.809	102.03	233.18	47.008	94.764	63.437
	93.437	105.3	79.192	16.756	65.929	80.969	39.193		171.17	64.372	181.4	61.06	74.824	27.628	52.475		63.731	63.731	118.68	52.475	34.511	124.25	202.58	38.152	87.024	72.591
	97.956	88.308	67.855	13.549	74.079	96.74	32.802		144.81	64.546	212.01	52.682	78.514	28.296	51.347		68.668	68.668	115.17	51.347	30.156	136.99	178.95	36.214	85.165	76.813
	97.166	72.861	57.745	15.882	86.043	117.72	28.421		150.03	63.658	250.03	43.314	74.344	27.357	49.632		78.016	78.016	124.77	49.632	29.722	136.51	162.39	45.018	92.886	74.497
	91.954	61.282	51.979	20.88	106.88	139.18	25.445		180.49	62.154	297.89	32.112	64.411	25.275	47.573		91.773	91.773	142.56	47.573	31.601	127.35	147.75	62.818	108.36	67.533
	87.414	55.897	51.369	25.665	135.48	156.38	22.771		220.57	59.906	346.92	20.933	52.886	22.761	45.485		108.68	108.68	167.73	45.485	34.188	115.13	134.89	83.88	126.05	58.33
	88.639	59.029	53.838	32.407	164.27	164.57	21.307		254.62	56.782	388.46	11.633	43.937	20.529	43.686		127.46	127.46	199.48	43.686	35.875	105.47	123.65	102.47	140.41	49.294
	100.72	76.211	58.167	43.024	185.66	161.8	21.961		267.01	52.652	413.86	6.0685	41.734	19.29	42.492		146.86	146.86	236.99	42.492	36.733	104.01	113.87	112.84	145.88	42.835
	131.2	105.89	63.136	54.261	192.05	151.22	25.64		250.75	45.014	421.17	5.3143	50.313	18.858	42.161		171.4	171.4	293.63	42.161	37.832	114.23	105.22	113.4	137.55	38.215
	176.68	139.78	67.524	62.865	177.42	135.78	34.639		216.26	33.954	416.16	8.1327	66.892	18.758	42.483		201.9	201.9	369.93	42.483	39.068	132.38	97.814	107.94	119.11	33.828
	225.85	169.56	72.289	65.581	146.84	118.41	48.351		174.03	23.227	401.76	12.912	85.421	19.269	43.07		231.61	231.61	445.86	43.07	40.336	153.23	92.138	98.915	97.954	30.78
	267.41	186.96	78.243	58.56	109.33	102.05	63.337		134.53	16.585	380.86	18.04	99.849	20.67	43.534		253.76	253.76	501.37	43.534	41.534	171.55	88.694	88.734	81.457	30.177
	290.07	188.73	83.953	43.97	73.938	84.565	76.157		108.25	17.782	356.38	21.905	104.13	23.242	43.489		261.59	261.59	516.41	43.489	43.022	182.11	87.982	79.826	77.004	33.124
	288.93	180.43	87.982	27.587	49.699	64.013	83.372		96.661	28.924	322.71	24.866	93.995	26.973	42.217		249.17	249.17	474.69	42.217	44.872	179.98	87.52	70.985	91.204	40.008
	271.54	166.87	88.895	15.186	38.758	43.568	82.799		92.777	47.51	277.91	27.998	73.487	31.679	39.978		221	221	389.58	39.978	46.538	168.63	86.975	60.594	119.13	50.094
	245.22	152.89	83.925	12.542	35.09	26.409	76.73		94.383	70.378	230.4	30.762	48.991	37.373	37.845		185.99	185.99	285.51	37.845	47.477	155.48	90.07	50.463	150.88	62.798
	217.27	143.32	74.027	22.624	35.477	15.713	68.441		99.264	94.368	188.57	32.62	26.894	44.069	36.894		153.03	153.03	186.91	36.894	47.144	147.93	100.53	42.399	176.54	77.539
	195.02	138.67	63.354	41.582	36.701	13.915	61.205		105.2	116.32	160.86	33.033	13.584	51.778	38.198		131.02	131.02	118.21	38.198	44.853	153.39	122.07	38.212	186.19	93.736
	175.29	135.74	56.061	64.963	35.543	18.897	58.297		109.21	138.74	148.72	31.216	11.065	63.158	42.143		121.21	121.21	83.057	42.143	40.969	179.57	163.55	39.912	174.84	116.16
	110.99	115.43	47.092	180.38	26.547	183.26	109.27		267.78	52.487	302.12	57.068	116.54	25.96	73.316		181.07	181.07	69.011	73.316	51.506	83.607	157.65	141.81	183.46	40.904
	99.093	111.95	45.219	187.95	14.634	189.59	92.23		395.2	56.082	302.82	50.84	96.619	25.543	75.369		200.23	200.23	93.432	75.369	57.26	96.205	142.27	149.04	168.58	36.879
	87.154	112.07	45.622	195.56	7.5915	186.12	72.211		504.69	60.325	298.8	46.185	77.933	25.065	76.544		214.9	214.9	117.1	76.544	62.647	106.22	131.82	152.87	153.95	33.601
	78.961	119.31	47.794	203.57	3.7808	167.19	54.127		567.03	62.251	287.33	44.96	63.495	24.622	76.218		217.17	217.17	133.76	76.218	68.851	109.57	132.57	151.69	143.65	31.15
	74.419	133.35	51.231	208.63	1.5651	135.41	42.888		571.05	61.572	262.3	49	53.054	24.112	73.767		202.88	202.88	142.76	73.767	76.251	102.3	150.9	143.61	138.77	29.088
	71.005	148.88	55.426	207.41	1.4927	99.252	40.515		536.21	60.266	225.51	57.068	44.601	23.47	69.606		177.29	177.29	148.27	69.606	83.07	87.126	182.67	129.7	136.62	27.359
	68.861	160.63	62.137	196.54	4.6552	67.204	43.734		479.28	58.764	186.14	66.411	38.514	22.85	64.671		146.65	146.65	151.27	64.671	87.527	69.989	218.26	112.8	135.52	26.624
	68.128	163.3	71.702	170.15	10.23	47.753	49.513		417.06	57.494	153.38	74.275	35.17	22.407	59.9		117.21	117.21	152.73	59.9	87.845	56.812	248.04	95.758	133.79	27.542
	68.95	153.97	81.483	130.47	17.394	43.045	54.823		366.33	56.887	136.41	77.907	34.945	22.297	56.229		95.2	95.2	153.62	56.229	82.144	53.526	262.4	81.41	129.77	30.773
	71.57	136.17	88.843	86.321	25.325	47.421	56.631		321.91	57.214	137.66	76.584	40.346	22.766	53.799		79.904	79.904	151.8	53.799	71.611	64.515	256.72	67.864	121.2	38.339
	75.893	114.29	91.145	46.528	33.049	57.665	54.13		272.64	58.19	151	72.139	51.121	23.712	51.985		67.156	67.156	146.61	51.985	59.063	85.827	237.41	53.227	109.2	49.8
	81.554	92.689	85.938	19.912	41.115	70.561	49.341		226.24	59.405	172.79	65.661	63.511	24.764	50.577		58.046	58.046	141.29	50.577	47.318	110.88	211.41	40.338	97.143	62.123
	88.185	75.764	74.982	8.5903	50.983	82.891	43.475		190.44	60.452	199.4	58.236	73.757	25.55	49.363		53.663	53.663	139.07	49.363	39.192	133.11	185.63	32.035	88.393	72.274
	95.418	61.848	61.95	6.6815	64.114	97.362	37.743		172.99	60.923	227.16	50.954	78.1	25.702	48.133		55.098	55.098	143.17	48.133	35.309	145.91	167.02	31.156	86.318	77.221
	103.34	48.021	50.516	11.009	81.969	116.12	33.356		184.33	61.175	261.54	42.69	73.424	24.961	46.883		63.642	63.642	152.55	46.883	33.793	145.44	156.68	41.892	94.6	75.339
	112.2	36.777	44.352	18.396	111.42	135.1	29.287		219.31	61.479	304.97	32.718	62.234	23.574	45.752		78.569	78.569	165.03	45.752	33.705	136.07	150.01	62.352	110.99	68.651
	121.86	30.61	44.796	25.666	151.5	150.25	24.727		262.25	61.3	349.26	22.725	49.206	21.928	44.747		97.941	97.941	182.22	44.747	34.11	123.61	145.31	86.248	129.97	59.592
	132.2	32.015	49.398	35.451	191.9	157.51	21.219		297.45	60.103	386.24	14.397	39.013	20.409	43.875		119.82	119.82	205.72	43.875	34.072	113.85	140.93	107.29	146.03	50.6
	143.08	45.041	56.154	49.87	222.29	155.31	20.305		309.24	57.353	407.72	9.4194	36.332	19.404	43.143		142.27	142.27	237.13	43.143	33.574	112.6	135.17	119.2	153.63	44.111
	155.24	68.026	63.06	64.973	232.36	146.36	23.527		289.85	50.628	411.2	8.7545	45.24	18.576	42.662		169.78	169.78	289.08	42.662	33.241	123.71	126.53	120.24	148.81	39.432
	168.79	94.894	68.115	76.812	214.19	133.01	33.725		249.73	40.285	402.13	11.278	62.622	17.667	42.429		203.65	203.65	360.51	42.429	33.096	143.33	116.12	114.58	135.23	34.938
	182.59	119.57	71.55	81.438	174.65	117.59	49.872		200.54	29.956	384.28	15.547	82.358	17.183	42.274		237.14	237.14	432.46	42.274	33.165	165.66	106.22	104.85	118.87	31.669
	195.53	135.99	74.701	74.69	125.64	102.46	67.706		153.92	23.273	361.37	20.12	98.332	17.629	42.028		263.48	263.48	485.97	42.028	33.472	184.88	99.098	93.658	105.71	30.665
	206.47	142.26	77.219	59.202	79.027	85.393	82.966		121.54	23.868	337.16	23.552	104.42	19.512	41.523		275.94	275.94	502.07	41.523	34.202	195.22	97.036	83.62	101.72	32.965
	217.54	142.44	78.753	41.213	46.695	64.822	91.391		104.59	33.564	307.21	26.214	96.748	22.928	39.848		269.7	269.7	466.73	39.848	35.339	191.68	97.302	73.168	111.86	38.805
	229.5	139.34	78.952	26.964	30.744	44.081	90.412		95.304	49.942	269.03	29.068	79.382	27.539	37.117		249.26	249.26	392.6	37.117	36.605	178.15	98.378	60.56	132.17	47.492
	239.15	135.79	76.053	22.695	23.254	26.504	82.869		91.88	70.264	229.27	31.56	58.157	33.201	34.694		221.83	221.83	300.72	34.694	37.723	162.07	104.36	48.146	155.18	58.672
	243.3	134.62	70.288	31.456	21.075	15.422	72.617		92.516	91.792	194.57	33.133	38.904	39.77	33.941		194.65	194.65	212.13	33.941	38.415	150.91	119.35	38.276	173.42	71.99
	238.78	137.06	64.304	49.085	21.057	13.121	63.511		95.408	111.79	171.58	33.233	27.454	47.102	36.222		174.92	174.92	147.87	36.222	38.643	152.1	147.44	33.303	179.43	87.092
	219.59	141.24	60.748	71.011	20.05	17.378	59.404		98.133	132.71	161.99	30.914	25.6	57.531	42.864		162.36	162.36	108.98	42.864	38.592	172.43	200.36	35.627	169.5	108.49
	187.85	145.28	62.265	92.659	17.802	24.768	62.699		101.89	156.39	161.37	26.546	29.456	71.154	52.956		152.15	152.15	81.428	52.956	38.319	206.92	275.39	43.682	148.59	136.42
	152.56	147.35	71.373	109.46	16.414	31.862	70.828		110.32	179.13	167.18	21.548	36.33	84.468	64.511		144.73	144.73	63.663	64.511	37.881	245.41	354.92	53.865	122.28	164.11
	122.68	145.57	86.308	121.86	16.263	35.236	80.185		127.06	197.25	176.88	17.34	43.531	93.974	75.538		140.54	140.54	54.125	75.538	37.337	277.78	421.36	62.57	96.178	184.8
	107.19	137.48	103.29	132.91	17.725	33.91	87.167		155.74	207.06	187.92	15.34	48.369	96.172	84.049		140.03	140.03	51.256	84.049	36.507	293.85	457.09	66.193	75.852	191.72
	111.82	124.3	118.55	141.93	21.177	30.169	88.17		207.5	207.4	202.57	16.018	51.233	87.811	90.436		146.53	146.53	59.574	90.436	35.351	285.25	454.22	61.841	59.864	179.6
	89.159	171.91	77.634	111.36	154.8	118.57	103.09		91.405	86.679	318.91	61.504	146.75	23.43	55.679		165.18	165.18	74.291	55.679	26.929	106.64	175.36	104.64	161.64	65.369
	116.64	151.52	68.421	120.62	116.63	129.21	114.7		92.88	65.72	329.06	58.861	140.63	25.358	59.52		158.91	158.91	54.149	59.52	28.859	110.19	173.33	113.66	182.41	59.282
	132.28	142.8	61.027	129.86	81.35	141.26	122.55		114.19	52.139	335.08	55.978	132.98	26.501	62.821		160.33	160.33	45.715	62.821	34.74	110.53	170.96	120.72	192.88	53.865
	133.12	140.44	55.223	139.02	53.956	155.03	124		168.78	47.974	337.41	52.043	122.62	26.602	65.974		176.25	176.25	53.667	65.974	44.333	107.69	166.2	126.64	189.76	48.64
	124.64	141.28	50.78	148.03	35.206	167.15	115.91		250.96	50.177	336.88	46.998	109.28	25.993	69.343		205.49	205.49	73.61	69.343	55.286	104.67	158.02	132.22	177.47	42.713
	111.3	142.13	47.614	156.84	21.776	174.24	100.07		340.57	55.691	332.82	42.057	94.723	25.062	72.343		237.85	237.85	98.529	72.343	65.248	101.44	149.49	136.22	160.97	36.797
	97.553	139.82	45.876	168.8	12.523	172.91	81.147		417.44	61.455	324.53	38.435	80.711	24.193	74.39		263.17	263.17	121.41	74.39	71.87	97.965	143.7	137.42	145.17	31.609
	87.846	134.1	45.695	183.95	6.3051	158.37	63.827		461.43	64.413	311.33	37.349	69.011	23.773	74.896		271.25	271.25	135.24	74.896	74.751	94.194	143.74	134.59	135.03	27.864
	81.928	127.07	47.2	197.26	1.9799	132.88	52.788		464.37	64.223	288.17	40.096	58.802	23.969	73.364		256.91	256.91	136.87	73.364	75.459	88.365	153.22	126.06	132.27	25.168
	76.831	119.14	50.519	203.71	-0.21207	103.62	49.777		439.72	62.924	255.52	45.866	48.908	24.525	70.184		226.92	226.92	130.99	70.184	74.592	80.502	170.08	112.65	133.6	23.045
	72.936	110.68	57.825	198.27	0.49061	77.789	51.675		399.69	61.028	220.94	52.712	40.559	25.188	66.104		189.09	189.09	122.3	66.104	72.751	73.259	188.91	96.865	136.43	22.084
	70.619	102.09	69.032	174.73	3.7273	62.577	55.859		356.5	59.046	191.99	58.684	34.984	25.706	61.872		151.21	151.21	115.52	61.872	70.534	69.285	204.27	81.194	138.15	22.876
	70.26	93.063	80.881	136.43	9.1376	60.217	59.71		322.37	57.49	176.25	61.834	33.413	25.828	58.236		121.08	121.08	115.36	58.236	67.583	71.231	210.74	68.138	136.14	26.009
	71.563	83.349	90.113	92.709	16.361	65.915	60.605		293.39	56.117	175.94	61.871	38.528	25.434	55.02		96.396	96.396	123.64	55.02	63.499	82.517	204.94	55.84	127.61	33.465
	74.275	73.391	93.47	52.865	24.525	76.321	57.9		261.4	54.587	186.01	60.094	49.508	24.69	51.725		71.965	71.965	137.23	51.725	58.818	101.38	190.48	42.634	114.28	44.849
	78.84	63.636	88.232	26.215	33.869	88.084	53.343		232.28	53.263	203.13	56.94	62.331	23.778	48.616		51.233	51.233	153.38	48.616	54.081	122.68	172.44	31.307	100.38	57.192
	85.704	54.53	76.571	14.383	45.704	97.854	47.9		211.93	52.509	223.97	52.846	72.978	22.879	45.955		37.65	37.65	169.35	45.955	49.825	141.29	155.9	24.646	90.112	67.524
	95.311	44.404	62.567	11.161	61.336	107.07	42.538		206.22	52.69	245.23	48.249	77.425	22.176	44.005		34.663	34.663	182.42	44.005	45.944	152.09	145.92	25.437	87.699	72.875
	110.87	32.96	50.3	14.112	82.074	117.98	38.224		225.1	54.799	271.4	42.127	72.535	21.766	43.035		45.227	45.227	189.11	43.035	42.077	151.58	144.93	38.1	96.893	71.802
	132.09	22.703	43.852	20.8	115.73	128.4	33.809		264.62	58.59	304.72	34.189	60.989	21.53	42.867		67.04	67.04	191.26	42.867	38.387	143.17	149.56	60.777	114.88	66.285
	154.15	16.134	44.875	28.79	161.42	136.18	28.649		309.91	62.578	338.4	25.968	47.494	21.318	43.102		95.675	95.675	194.05	43.102	35.034	132.11	156.15	86.839	136.04	58.488
	172.24	15.758	50.647	41.512	207.44	139.14	24.466		346.05	65.275	365.66	18.996	36.759	20.98	43.339		126.7	126.7	202.68	43.339	32.18	123.66	161.09	109.66	154.73	50.579
	181.53	23.982	58.691	60.59	242.08	136.44	22.982		358.16	65.191	379.72	14.804	33.493	20.369	43.18		155.7	155.7	222.35	43.18	29.816	123.07	160.73	122.61	165.33	44.722
	176.62	39.137	66.529	80.879	253.64	129.53	25.921		338.27	60.041	377.61	14.139	41.185	18.811	42.596		186.31	186.31	263.74	42.596	27.837	134.09	151.51	123.75	165.17	40.249
	160.71	57.612	71.683	97.233	233.05	119.67	36.244		296.29	50.817	363.87	15.978	56.696	16.408	41.854		221.48	221.48	323.39	41.854	26.252	153.23	135.85	117.52	157.99	35.715
	141.93	75.796	73.872	104.51	188.14	108.14	52.802		244.2	40.948	342.92	19.204	74.792	14.165	40.995		255.74	255.74	385.27	40.995	25.073	174.84	119.1	106.8	147.81	32.125
	128.4	90.078	74.75	98.313	132.47	96.204	71.153		193.95	33.864	319.22	22.701	90.238	13.09	40.061		283.64	283.64	433.34	40.061	24.311	193.29	106.62	94.481	138.65	30.483
	128.24	99.92	74.736	82.079	79.604	82.018	86.854		157.52	32.995	297.2	25.35	97.8	14.189	39.093		299.69	299.69	451.56	39.093	23.821	202.93	103.77	83.46	134.51	31.792
	149.83	107.73	74.246	62.391	43.108	64.732	95.462		135.23	39.628	274.11	27.554	94.726	18.054	36.868		300.94	300.94	430.64	36.868	23.593	199.61	108.23	71.969	137.87	36.231
	187.77	114.31	73.7	45.832	25.136	47.121	94.331		119.13	51.475	246.99	30.057	84.507	24.012	33.358		291.02	291.02	381.27	33.358	23.849	187.1	116.45	58.079	146.05	43.13
	229.47	120.48	72.055	38.986	16.642	31.957	86.422		108.69	66.607	219.98	32.258	71.269	31.179	30.398		274.4	274.4	317.39	30.398	24.807	171.61	131.88	44.441	155.35	52.223
	262.36	127.03	69.034	44.659	14.4	22.011	75.705		103.38	83.095	197.2	33.554	59.137	38.669	29.824		255.53	255.53	252.95	29.824	26.686	159.35	157.98	33.705	162.05	63.242
	273.86	135.82	66.197	58.461	15.179	18.899	66.15		102.71	99.008	182.81	33.344	52.238	45.597	33.472		238.86	238.86	201.9	33.472	30.426	156.54	198.2	28.52	162.43	75.92
	255.58	146.32	65.109	76.185	15.75	20.77	61.726		106.01	116.66	178.89	30.467	51.775	53.329	43.8		221.95	221.95	161.39	43.8	35.879	168.18	268.14	31.56	154.49	93.765
	215.9	155.74	67.331	93.622	16.648	25.205	64.983		113.65	137.35	182.68	25.325	54.996	62.454	59.585		201.81	201.81	122.13	59.585	41.639	190.14	365.48	41.059	140.7	116.95
	167.42	161.3	74.427	106.57	20.027	29.786	73.275		126.57	157.58	191.05	19.658	60.099	70.926	77.139		182.14	182.14	88.375	77.139	46.296	214.89	466.86	53.005	124.07	140.23
	122.7	160.23	85.356	114.72	25.084	32.09	82.777		145.75	173.9	200.84	15.209	65.279	76.695	92.769		166.63	166.63	64.405	92.769	48.443	234.94	548.88	63.39	107.62	158.32
	94.338	148.03	97.772	120.88	31.015	31.722	89.666		172.16	182.82	208.93	13.719	68.734	77.715	102.79		158.95	158.95	54.483	102.79	46.848	242.76	588.18	68.204	94.339	165.97
	85.896	126.55	109.33	125.51	37.016	30.294	90.119		214.94	183.22	213.29	16.124	70.985	71.868	106.23		162.79	162.79	65.249	106.23	42.449	231.03	571.75	64.434	83.457	159.77
	51.298	90.309	61.227	33.118	131.65	164.59	25.094		213.04	56.335	362.64	10.902	53.919	21.838	42.021		162.98	162.98	177.31	42.021	37.477	98.936	106.92	92.958	137.86	45.345
	66.678	179.93	60.987	206.39	12.53	93.804	32.064		585.27	61.527	202.07	61.692	43.266	22.984	68.117		143.87	143.87	165.1	68.117	92.056	91.263	188.17	139.59	142.49	31.748
	66.439	213.59	66.917	193.6	19.868	65.744	36.947		522.24	60.232	161.82	71.963	40.156	21.694	63.895		118.9	118.9	176.27	63.895	101.79	69.968	233.03	121.88	137.47	31.06
	67.398	228.92	75.471	168.01	29.234	48.735	44.443		452.14	59.245	128.46	80.555	39.519	20.775	59.885		95.823	95.823	183.35	59.885	104.38	52.616	270.81	103.95	132.17	31.827
	69.53	220.33	84.27	131.02	39.08	44.438	51.205		393.23	58.898	111.69	84.387	40.719	20.593	56.86		79.631	79.631	184.61	56.86	96.8	46.58	289.66	88.9	125.94	34.734
	73.722	195.3	90.933	90.308	47.857	48	53.889		339.18	59.639	113.94	82.615	45.854	21.613	55.059		70.321	70.321	175.13	55.059	81.489	56.395	284.44	75.001	116.96	41.673
	79.991	162.21	93.083	53.538	54.467	56.935	51.39		277.83	61.246	128.73	77.292	55.348	23.59	53.97		64.563	64.563	156.06	53.97	62.98	77.145	263.04	60.164	105.65	52.185
	87.005	129.42	88.64	28.382	59.941	68.754	45.94		218.67	63.048	152.43	69.685	66.053	25.827	53.229		62.365	62.365	134.78	53.229	45.809	102.03	233.18	47.008	94.764	63.437
	93.437	105.3	79.192	16.756	65.929	80.969	39.193		171.17	64.372	181.4	61.06	74.824	27.628	52.475		63.731	63.731	118.68	52.475	34.511	124.25	202.58	38.152	87.024	72.591
	97.956	88.308	67.855	13.549	74.079	96.74	32.802		144.81	64.546	212.01	52.682	78.514	28.296	51.347		68.668	68.668	115.17	51.347	30.156	136.99	178.95	36.214	85.165	76.813
	97.166	72.861	57.745	15.882	86.043	117.72	28.421		150.03	63.658	250.03	43.314	74.344	27.357	49.632		78.016	78.016	124.77	49.632	29.722	136.51	162.39	45.018	92.886	74.497
	91.954	61.282	51.979	20.88	106.88	139.18	25.445		180.49	62.154	297.89	32.112	64.411	25.275	47.573		91.773	91.773	142.56	47.573	31.601	127.35	147.75	62.818	108.36	67.533
	87.414	55.897	51.369	25.665	135.48	156.38	22.771		220.57	59.906	346.92	20.933	52.886	22.761	45.485		108.68	108.68	167.73	45.485	34.188	115.13	134.89	83.88	126.05	58.33
	88.639	59.029	53.838	32.407	164.27	164.57	21.307		254.62	56.782	388.46	11.633	43.937	20.529	43.686		127.46	127.46	199.48	43.686	35.875	105.47	123.65	102.47	140.41	49.294
	100.72	76.211	58.167	43.024	185.66	161.8	21.961		267.01	52.652	413.86	6.0685	41.734	19.29	42.492		146.86	146.86	236.99	42.492	36.733	104.01	113.87	112.84	145.88	42.835
	131.2	105.89	63.136	54.261	192.05	151.22	25.64		250.75	45.014	421.17	5.3143	50.313	18.858	42.161		171.4	171.4	293.63	42.161	37.832	114.23	105.22	113.4	137.55	38.215
	176.68	139.78	67.524	62.865	177.42	135.78	34.639		216.26	33.954	416.16	8.1327	66.892	18.758	42.483		201.9	201.9	369.93	42.483	39.068	132.38	97.814	107.94	119.11	33.828
	225.85	169.56	72.289	65.581	146.84	118.41	48.351		174.03	23.227	401.76	12.912	85.421	19.269	43.07		231.61	231.61	445.86	43.07	40.336	153.23	92.138	98.915	97.954	30.78
	267.41	186.96	78.243	58.56	109.33	102.05	63.337		134.53	16.585	380.86	18.04	99.849	20.67	43.534		253.76	253.76	501.37	43.534	41.534	171.55	88.694	88.734	81.457	30.177
	290.07	188.73	83.953	43.97	73.938	84.565	76.157		108.25	17.782	356.38	21.905	104.13	23.242	43.489		261.59	261.59	516.41	43.489	43.022	182.11	87.982	79.826	77.004	33.124
	288.93	180.43	87.982	27.587	49.699	64.013	83.372		96.661	28.924	322.71	24.866	93.995	26.973	42.217		249.17	249.17	474.69	42.217	44.872	179.98	87.52	70.985	91.204	40.008
	271.54	166.87	88.895	15.186	38.758	43.568	82.799		92.777	47.51	277.91	27.998	73.487	31.679	39.978		221	221	389.58	39.978	46.538	168.63	86.975	60.594	119.13	50.094
	245.22	152.89	83.925	12.542	35.09	26.409	76.73		94.383	70.378	230.4	30.762	48.991	37.373	37.845		185.99	185.99	285.51	37.845	47.477	155.48	90.07	50.463	150.88	62.798
	217.27	143.32	74.027	22.624	35.477	15.713	68.441		99.264	94.368	188.57	32.62	26.894	44.069	36.894		153.03	153.03	186.91	36.894	47.144	147.93	100.53	42.399	176.54	77.539
	195.02	138.67	63.354	41.582	36.701	13.915	61.205		105.2	116.32	160.86	33.033	13.584	51.778	38.198		131.02	131.02	118.21	38.198	44.853	153.39	122.07	38.212	186.19	93.736
	175.29	135.74	56.061	64.963	35.543	18.897	58.297		109.21	138.74	148.72	31.216	11.065	63.158	42.143		121.21	121.21	83.057	42.143	40.969	179.57	163.55	39.912	174.84	116.16
	110.99	115.43	47.092	180.38	26.547	183.26	109.27		267.78	52.487	302.12	57.068	116.54	25.96	73.316		181.07	181.07	69.011	73.316	51.506	83.607	157.65	141.81	183.46	40.904
	99.093	111.95	45.219	187.95	14.634	189.59	92.23		395.2	56.082	302.82	50.84	96.619	25.543	75.369		200.23	200.23	93.432	75.369	57.26	96.205	142.27	149.04	168.58	36.879
	87.154	112.07	45.622	195.56	7.5915	186.12	72.211		504.69	60.325	298.8	46.185	77.933	25.065	76.544		214.9	214.9	117.1	76.544	62.647	106.22	131.82	152.87	153.95	33.601
	78.961	119.31	47.794	203.57	3.7808	167.19	54.127		567.03	62.251	287.33	44.96	63.495	24.622	76.218		217.17	217.17	133.76	76.218	68.851	109.57	132.57	151.69	143.65	31.15
	74.419	133.35	51.231	208.63	1.5651	135.41	42.888		571.05	61.572	262.3	49	53.054	24.112	73.767		202.88	202.88	142.76	73.767	76.251	102.3	150.9	143.61	138.77	29.088
	71.005	148.88	55.426	207.41	1.4927	99.252	40.515		536.21	60.266	225.51	57.068	44.601	23.47	69.606		177.29	177.29	148.27	69.606	83.07	87.126	182.67	129.7	136.62	27.359
	68.861	160.63	62.137	196.54	4.6552	67.204	43.734		479.28	58.764	186.14	66.411	38.514	22.85	64.671		146.65	146.65	151.27	64.671	87.527	69.989	218.26	112.8	135.52	26.624
	68.128	163.3	71.702	170.15	10.23	47.753	49.513		417.06	57.494	153.38	74.275	35.17	22.407	59.9		117.21	117.21	152.73	59.9	87.845	56.812	248.04	95.758	133.79	27.542
	68.95	153.97	81.483	130.47	17.394	43.045	54.823		366.33	56.887	136.41	77.907	34.945	22.297	56.229		95.2	95.2	153.62	56.229	82.144	53.526	262.4	81.41	129.77	30.773
	71.57	136.17	88.843	86.321	25.325	47.421	56.631		321.91	57.214	137.66	76.584	40.346	22.766	53.799		79.904	79.904	151.8	53.799	71.611	64.515	256.72	67.864	121.2	38.339
	75.893	114.29	91.145	46.528	33.049	57.665	54.13		272.64	58.19	151	72.139	51.121	23.712	51.985		67.156	67.156	146.61	51.985	59.063	85.827	237.41	53.227	109.2	49.8
	81.554	92.689	85.938	19.912	41.115	70.561	49.341		226.24	59.405	172.79	65.661	63.511	24.764	50.577		58.046	58.046	141.29	50.577	47.318	110.88	211.41	40.338	97.143	62.123
	88.185	75.764	74.982	8.5903	50.983	82.891	43.475		190.44	60.452	199.4	58.236	73.757	25.55	49.363		53.663	53.663	139.07	49.363	39.192	133.11	185.63	32.035	88.393	72.274
	95.418	61.848	61.95	6.6815	64.114	97.362	37.743		172.99	60.923	227.16	50.954	78.1	25.702	48.133		55.098	55.098	143.17	48.133	35.309	145.91	167.02	31.156	86.318	77.221
	103.34	48.021	50.516	11.009	81.969	116.12	33.356		184.33	61.175	261.54	42.69	73.424	24.961	46.883		63.642	63.642	152.55	46.883	33.793	145.44	156.68	41.892	94.6	75.339
	112.2	36.777	44.352	18.396	111.42	135.1	29.287		219.31	61.479	304.97	32.718	62.234	23.574	45.752		78.569	78.569	165.03	45.752	33.705	136.07	150.01	62.352	110.99	68.651
	121.86	30.61	44.796	25.666	151.5	150.25	24.727		262.25	61.3	349.26	22.725	49.206	21.928	44.747		97.941	97.941	182.22	44.747	34.11	123.61	145.31	86.248	129.97	59.592
	132.2	32.015	49.398	35.451	191.9	157.51	21.219		297.45	60.103	386.24	14.397	39.013	20.409	43.875		119.82	119.82	205.72	43.875	34.072	113.85	140.93	107.29	146.03	50.6
	143.08	45.041	56.154	49.87	222.29	155.31	20.305		309.24	57.353	407.72	9.4194	36.332	19.404	43.143		142.27	142.27	237.13	43.143	33.574	112.6	135.17	119.2	153.63	44.111
	155.24	68.026	63.06	64.973	232.36	146.36	23.527		289.85	50.628	411.2	8.7545	45.24	18.576	42.662		169.78	169.78	289.08	42.662	33.241	123.71	126.53	120.24	148.81	39.432
	168.79	94.894	68.115	76.812	214.19	133.01	33.725		249.73	40.285	402.13	11.278	62.622	17.667	42.429		203.65	203.65	360.51	42.429	33.096	143.33	116.12	114.58	135.23	34.938
	182.59	119.57	71.55	81.438	174.65	117.59	49.872		200.54	29.956	384.28	15.547	82.358	17.183	42.274		237.14	237.14	432.46	42.274	33.165	165.66	106.22	104.85	118.87	31.669
	195.53	135.99	74.701	74.69	125.64	102.46	67.706		153.92	23.273	361.37	20.12	98.332	17.629	42.028		263.48	263.48	485.97	42.028	33.472	184.88	99.098	93.658	105.71	30.665
	206.47	142.26	77.219	59.202	79.027	85.393	82.966		121.54	23.868	337.16	23.552	104.42	19.512	41.523		275.94	275.94	502.07	41.523	34.202	195.22	97.036	83.62	101.72	32.965
	217.54	142.44	78.753	41.213	46.695	64.822	91.391		104.59	33.564	307.21	26.214	96.748	22.928	39.848		269.7	269.7	466.73	39.848	35.339	191.68	97.302	73.168	111.86	38.805
	229.5	139.34	78.952	26.964	30.744	44.081	90.412		95.304	49.942	269.03	29.068	79.382	27.539	37.117		249.26	249.26	392.6	37.117	36.605	178.15	98.378	60.56	132.17	47.492
	239.15	135.79	76.053	22.695	23.254	26.504	82.869		91.88	70.264	229.27	31.56	58.157	33.201	34.694		221.83	221.83	300.72	34.694	37.723	162.07	104.36	48.146	155.18	58.672
	243.3	134.62	70.288	31.456	21.075	15.422	72.617		92.516	91.792	194.57	33.133	38.904	39.77	33.941		194.65	194.65	212.13	33.941	38.415	150.91	119.35	38.276	173.42	71.99
	238.78	137.06	64.304	49.085	21.057	13.121	63.511		95.408	111.79	171.58	33.233	27.454	47.102	36.222		174.92	174.92	147.87	36.222	38.643	152.1	147.44	33.303	179.43	87.092
	219.59	141.24	60.748	71.011	20.05	17.378	59.404		98.133	132.71	161.99	30.914	25.6	57.531	42.864		162.36	162.36	108.98	42.864	38.592	172.43	200.36	35.627	169.5	108.49
	187.85	145.28	62.265	92.659	17.802	24.768	62.699		101.89	156.39	161.37	26.546	29.456	71.154	52.956		152.15	152.15	81.428	52.956	38.319	206.92	275.39	43.682	148.59	136.42
	152.56	147.35	71.373	109.46	16.414	31.862	70.828		110.32	179.13	167.18	21.548	36.33	84.468	64.511		144.73	144.73	63.663	64.511	37.881	245.41	354.92	53.865	122.28	164.11
	122.68	145.57	86.308	121.86	16.263	35.236	80.185		127.06	197.25	176.88	17.34	43.531	93.974	75.538		140.54	140.54	54.125	75.538	37.337	277.78	421.36	62.57	96.178	184.8
	107.19	137.48	103.29	132.91	17.725	33.91	87.167		155.74	207.06	187.92	15.34	48.369	96.172	84.049		140.03	140.03	51.256	84.049	36.507	293.85	457.09	66.193	75.852	191.72
	111.82	124.3	118.55	141.93	21.177	30.169	88.17		207.5	207.4	202.57	16.018	51.233	87.811	90.436		146.53	146.53	59.574	90.436	35.351	285.25	454.22	61.841	59.864	179.6
	89.159	171.91	77.634	111.36	154.8	118.57	103.09		91.405	86.679	318.91	61.504	146.75	23.43	55.679		165.18	165.18	74.291	55.679	26.929	106.64	175.36	104.64	161.64	65.369
	116.64	151.52	68.421	120.62	116.63	129.21	114.7		92.88	65.72	329.06	58.861	140.63	25.358	59.52		158.91	158.91	54.149	59.52	28.859	110.19	173.33	113.66	182.41	59.282
	132.28	142.8	61.027	129.86	81.35	141.26	122.55		114.19	52.139	335.08	55.978	132.98	26.501	62.821		160.33	160.33	45.715	62.821	34.74	110.53	170.96	120.72	192.88	53.865
	133.12	140.44	55.223	139.02	53.956	155.03	124		168.78	47.974	337.41	52.043	122.62	26.602	65.974		176.25	176.25	53.667	65.974	44.333	107.69	166.2	126.64	189.76	48.64
	124.64	141.28	50.78	148.03	35.206	167.15	115.91		250.96	50.177	336.88	46.998	109.28	25.993	69.343		205.49	205.49	73.61	69.343	55.286	104.67	158.02	132.22	177.47	42.713
	111.3	142.13	47.614	156.84	21.776	174.24	100.07		340.57	55.691	332.82	42.057	94.723	25.062	72.343		237.85	237.85	98.529	72.343	65.248	101.44	149.49	136.22	160.97	36.797
	97.553	139.82	45.876	168.8	12.523	172.91	81.147		417.44	61.455	324.53	38.435	80.711	24.193	74.39		263.17	263.17	121.41	74.39	71.87	97.965	143.7	137.42	145.17	31.609
	87.846	134.1	45.695	183.95	6.3051	158.37	63.827		461.43	64.413	311.33	37.349	69.011	23.773	74.896		271.25	271.25	135.24	74.896	74.751	94.194	143.74	134.59	135.03	27.864
	81.928	127.07	47.2	197.26	1.9799	132.88	52.788		464.37	64.223	288.17	40.096	58.802	23.969	73.364		256.91	256.91	136.87	73.364	75.459	88.365	153.22	126.06	132.27	25.168
	76.831	119.14	50.519	203.71	-0.21207	103.62	49.777		439.72	62.924	255.52	45.866	48.908	24.525	70.184		226.92	226.92	130.99	70.184	74.592	80.502	170.08	112.65	133.6	23.045
	72.936	110.68	57.825	198.27	0.49061	77.789	51.675		399.69	61.028	220.94	52.712	40.559	25.188	66.104		189.09	189.09	122.3	66.104	72.751	73.259	188.91	96.865	136.43	22.084
	70.619	102.09	69.032	174.73	3.7273	62.577	55.859		356.5	59.046	191.99	58.684	34.984	25.706	61.872		151.21	151.21	115.52	61.872	70.534	69.285	204.27	81.194	138.15	22.876
	70.26	93.063	80.881	136.43	9.1376	60.217	59.71		322.37	57.49	176.25	61.834	33.413	25.828	58.236		121.08	121.08	115.36	58.236	67.583	71.231	210.74	68.138	136.14	26.009
	71.563	83.349	90.113	92.709	16.361	65.915	60.605		293.39	56.117	175.94	61.871	38.528	25.434	55.02		96.396	96.396	123.64	55.02	63.499	82.517	204.94	55.84	127.61	33.465
	74.275	73.391	93.47	52.865	24.525	76.321	57.9		261.4	54.587	186.01	60.094	49.508	24.69	51.725		71.965	71.965	137.23	51.725	58.818	101.38	190.48	42.634	114.28	44.849
	78.84	63.636	88.232	26.215	33.869	88.084	53.343		232.28	53.263	203.13	56.94	62.331	23.778	48.616		51.233	51.233	153.38	48.616	54.081	122.68	172.44	31.307	100.38	57.192
	85.704	54.53	76.571	14.383	45.704	97.854	47.9		211.93	52.509	223.97	52.846	72.978	22.879	45.955		37.65	37.65	169.35	45.955	49.825	141.29	155.9	24.646	90.112	67.524
	95.311	44.404	62.567	11.161	61.336	107.07	42.538		206.22	52.69	245.23	48.249	77.425	22.176	44.005		34.663	34.663	182.42	44.005	45.944	152.09	145.92	25.437	87.699	72.875
	110.87	32.96	50.3	14.112	82.074	117.98	38.224		225.1	54.799	271.4	42.127	72.535	21.766	43.035		45.227	45.227	189.11	43.035	42.077	151.58	144.93	38.1	96.893	71.802
	132.09	22.703	43.852	20.8	115.73	128.4	33.809		264.62	58.59	304.72	34.189	60.989	21.53	42.867		67.04	67.04	191.26	42.867	38.387	143.17	149.56	60.777	114.88	66.285
	154.15	16.134	44.875	28.79	161.42	136.18	28.649		309.91	62.578	338.4	25.968	47.494	21.318	43.102		95.675	95.675	194.05	43.102	35.034	132.11	156.15	86.839	136.04	58.488
	172.24	15.758	50.647	41.512	207.44	139.14	24.466		346.05	65.275	365.66	18.996	36.759	20.98	43.339		126.7	126.7	202.68	43.339	32.18	123.66	161.09	109.66	154.73	50.579
	181.53	23.982	58.691	60.59	242.08	136.44	22.982		358.16	65.191	379.72	14.804	33.493	20.369	43.18		155.7	155.7	222.35	43.18	29.816	123.07	160.73	122.61	165.33	44.722
	176.62	39.137	66.529	80.879	253.64	129.53	25.921		338.27	60.041	377.61	14.139	41.185	18.811	42.596		186.31	186.31	263.74	42.596	27.837	134.09	151.51	123.75	165.17	40.249
	160.71	57.612	71.683	97.233	233.05	119.67	36.244		296.29	50.817	363.87	15.978	56.696	16.408	41.854		221.48	221.48	323.39	41.854	26.252	153.23	135.85	117.52	157.99	35.715
	141.93	75.796	73.872	104.51	188.14	108.14	52.802		244.2	40.948	342.92	19.204	74.792	14.165	40.995		255.74	255.74	385.27	40.995	25.073	174.84	119.1	106.8	147.81	32.125
	128.4	90.078	74.75	98.313	132.47	96.204	71.153		193.95	33.864	319.22	22.701	90.238	13.09	40.061		283.64	283.64	433.34	40.061	24.311	193.29	106.62	94.481	138.65	30.483
	128.24	99.92	74.736	82.079	79.604	82.018	86.854		157.52	32.995	297.2	25.35	97.8	14.189	39.093		299.69	299.69	451.56	39.093	23.821	202.93	103.77	83.46	134.51	31.792
	149.83	107.73	74.246	62.391	43.108	64.732	95.462		135.23	39.628	274.11	27.554	94.726	18.054	36.868		300.94	300.94	430.64	36.868	23.593	199.61	108.23	71.969	137.87	36.231
	187.77	114.31	73.7	45.832	25.136	47.121	94.331		119.13	51.475	246.99	30.057	84.507	24.012	33.358		291.02	291.02	381.27	33.358	23.849	187.1	116.45	58.079	146.05	43.13
	229.47	120.48	72.055	38.986	16.642	31.957	86.422		108.69	66.607	219.98	32.258	71.269	31.179	30.398		274.4	274.4	317.39	30.398	24.807	171.61	131.88	44.441	155.35	52.223
	262.36	127.03	69.034	44.659	14.4	22.011	75.705		103.38	83.095	197.2	33.554	59.137	38.669	29.824		255.53	255.53	252.95	29.824	26.686	159.35	157.98	33.705	162.05	63.242
	273.86	135.82	66.197	58.461	15.179	18.899	66.15		102.71	99.008	182.81	33.344	52.238	45.597	33.472		238.86	238.86	201.9	33.472	30.426	156.54	198.2	28.52	162.43	75.92
	255.58	146.32	65.109	76.185	15.75	20.77	61.726		106.01	116.66	178.89	30.467	51.775	53.329	43.8		221.95	221.95	161.39	43.8	35.879	168.18	268.14	31.56	154.49	93.765
	215.9	155.74	67.331	93.622	16.648	25.205	64.983		113.65	137.35	182.68	25.325	54.996	62.454	59.585		201.81	201.81	122.13	59.585	41.639	190.14	365.48	41.059	140.7	116.95
	167.42	161.3	74.427	106.57	20.027	29.786	73.275		126.57	157.58	191.05	19.658	60.099	70.926	77.139		182.14	182.14	88.375	77.139	46.296	214.89	466.86	53.005	124.07	140.23
	122.7	160.23	85.356	114.72	25.084	32.09	82.777		145.75	173.9	200.84	15.209	65.279	76.695	92.769		166.63	166.63	64.405	92.769	48.443	234.94	548.88	63.39	107.62	158.32
	94.338	148.03	97.772	120.88	31.015	31.722	89.666		172.16	182.82	208.93	13.719	68.734	77.715	102.79		158.95	158.95	54.483	102.79	46.848	242.76	588.18	68.204	94.339	165.97
	85.896	126.55	109.33	125.51	37.016	30.294	90.119		214.94	183.22	213.29	16.124	70.985	71.868	106.23		162.79	162.79	65.249	106.23	42.449	231.03	571.75	64.434	83.457	159.77
	51.298	90.309	61.227	33.118	131.65	164.59	25.094		213.04	56.335	362.64	10.902	53.919	21.838	42.021		162.98	162.98	177.31	42.021	37.477	98.936	106.92	92.958	137.86	45.345
	66.678	179.93	60.987	206.39	12.53	93.804	32.064		585.27	61.527	202.07	61.692	43.266	22.984	68.117		143.87	143.87	165.1	68.117	92.056	91.263	188.17	139.59	142.49	31.748
	66.439	213.59	66.917	193.6	19.868	65.744	36.947		522.24	60.232	161.82	71.963	40.156	21.694	63.895		118.9	118.9	176.27	63.895	101.79	69.968	233.03	121.88	137.47	31.06
	67.398	228.92	75.471	168.01	29.234	48.735	44.443		452.14	59.245	128.46	80.555	39.519	20.775	59.885		95.823	95.823	183.35	59.885	104.38	52.616	270.81	103.95	132.17	31.827
	69.53	220.33	84.27	131.02	39.08	44.438	51.205		393.23	58.898	111.69	84.387	40.719	20.593	56.86		79.631	79.631	184.61	56.86	96.8	46.58	289.66	88.9	125.94	34.734
	73.722	195.3	90.933	90.308	47.857	48	53.889		339.18	59.639	113.94	82.615	45.854	21.613	55.059		70.321	70.321	175.13	55.059	81.489	56.395	284.44	75.001	116.96	41.673
	79.991	162.21	93.083	53.538	54.467	56.935	51.39		277.83	61.246	128.73	77.292	55.348	23.59	53.97		64.563	64.563	156.06	53.97	62.98	77.145	263.04	60.164	105.65	52.185
	87.005	129.42	88.64	28.382	59.941	68.754	45.94		218.67	63.048	152.43	69.685	66.053	25.827	53.229		62.365	62.365	134.78	53.229	45.809	102.03	233.18	47.008	94.764	63.437
	93.437	105.3	79.192	16.756	65.929	80.969	39.193		171.17	64.372	181.4	61.06	74.824	27.628	52.475		63.731	63.731	118.68	52.475	34.511	124.25	202.58	38.152	87.024	72.591
	97.956	88.308	67.855	13.549	74.079	96.74	32.802		144.81	64.546	212.01	52.682	78.514	28.296	51.347		68.668	68.668	115.17	51.347	30.156	136.99	178.95	36.214	85.165	76.813
	97.166	72.861	57.745	15.882	86.043	117.72	28.421		150.03	63.658	250.03	43.314	74.344	27.357	49.632		78.016	78.016	124.77	49.632	29.722	136.51	162.39	45.018	92.886	74.497
	91.954	61.282	51.979	20.88	106.88	139.18	25.445		180.49	62.154	297.89	32.112	64.411	25.275	47.573		91.773	91.773	142.56	47.573	31.601	127.35	147.75	62.818	108.36	67.533
	87.414	55.897	51.369	25.665	135.48	156.38	22.771		220.57	59.906	346.92	20.933	52.886	22.761	45.485		108.68	108.68	167.73	45.485	34.188	115.13	134.89	83.88	126.05	58.33
	88.639	59.029	53.838	32.407	164.27	164.57	21.307		254.62	56.782	388.46	11.633	43.937	20.529	43.686		127.46	127.46	199.48	43.686	35.875	105.47	123.65	102.47	140.41	49.294
	100.72	76.211	58.167	43.024	185.66	161.8	21.961		267.01	52.652	413.86	6.0685	41.734	19.29	42.492		146.86	146.86	236.99	42.492	36.733	104.01	113.87	112.84	145.88	42.835
	131.2	105.89	63.136	54.261	192.05	151.22	25.64		250.75	45.014	421.17	5.3143	50.313	18.858	42.161		171.4	171.4	293.63	42.161	37.832	114.23	105.22	113.4	137.55	38.215
	176.68	139.78	67.524	62.865	177.42	135.78	34.639		216.26	33.954	416.16	8.1327	66.892	18.758	42.483		201.9	201.9	369.93	42.483	39.068	132.38	97.814	107.94	119.11	33.828
	225.85	169.56	72.289	65.581	146.84	118.41	48.351		174.03	23.227	401.76	12.912	85.421	19.269	43.07		231.61	231.61	445.86	43.07	40.336	153.23	92.138	98.915	97.954	30.78
	267.41	186.96	78.243	58.56	109.33	102.05	63.337		134.53	16.585	380.86	18.04	99.849	20.67	43.534		253.76	253.76	501.37	43.534	41.534	171.55	88.694	88.734	81.457	30.177
	290.07	188.73	83.953	43.97	73.938	84.565	76.157		108.25	17.782	356.38	21.905	104.13	23.242	43.489		261.59	261.59	516.41	43.489	43.022	182.11	87.982	79.826	77.004	33.124
	288.93	180.43	87.982	27.587	49.699	64.013	83.372		96.661	28.924	322.71	24.866	93.995	26.973	42.217		249.17	249.17	474.69	42.217	44.872	179.98	87.52	70.985	91.204	40.008
	271.54	166.87	88.895	15.186	38.758	43.568	82.799		92.777	47.51	277.91	27.998	73.487	31.679	39.978		221	221	389.58	39.978	46.538	168.63	86.975	60.594	119.13	50.094
	245.22	152.89	83.925	12.542	35.09	26.409	76.73		94.383	70.378	230.4	30.762	48.991	37.373	37.845		185.99	185.99	285.51	37.845	47.477	155.48	90.07	50.463	150.88	62.798
	217.27	143.32	74.027	22.624	35.477	15.713	68.441		99.264	94.368	188.57	32.62	26.894	44.069	36.894		153.03	153.03	186.91	36.894	47.144	147.93	100.53	42.399	176.54	77.539
	195.02	138.67	63.354	41.582	36.701	13.915	61.205		105.2	116.32	160.86	33.033	13.584	51.778	38.198		131.02	131.02	118.21	38.198	44.853	153.39	122.07	38.212	186.19	93.736
	175.29	135.74	56.061	64.963	35.543	18.897	58.297		109.21	138.74	148.72	31.216	11.065	63.158	42.143		121.21	121.21	83.057	42.143	40.969	179.57	163.55	39.912	174.84	116.16
	110.99	115.43	47.092	180.38	26.547	183.26	109.27		267.78	52.487	302.12	57.068	116.54	25.96	73.316		181.07	181.07	69.011	73.316	51.506	83.607	157.65	141.81	183.46	40.904
	99.093	111.95	45.219	187.95	14.634	189.59	92.23		395.2	56.082	302.82	50.84	96.619	25.543	75.369		200.23	200.23	93.432	75.369	57.26	96.205	142.27	149.04	168.58	36.879
	87.154	112.07	45.622	195.56	7.5915	186.12	72.211		504.69	60.325	298.8	46.185	77.933	25.065	76.544		214.9	214.9	117.1	76.544	62.647	106.22	131.82	152.87	153.95	33.601
	78.961	119.31	47.794	203.57	3.7808	167.19	54.127		567.03	62.251	287.33	44.96	63.495	24.622	76.218		217.17	217.17	133.76	76.218	68.851	109.57	132.57	151.69	143.65	31.15
	74.419	133.35	51.231	208.63	1.5651	135.41	42.888		571.05	61.572	262.3	49	53.054	24.112	73.767		202.88	202.88	142.76	73.767	76.251	102.3	150.9	143.61	138.77	29.088
	71.005	148.88	55.426	207.41	1.4927	99.252	40.515		536.21	60.266	225.51	57.068	44.601	23.47	69.606		177.29	177.29	148.27	69.606	83.07	87.126	182.67	129.7	136.62	27.359
	68.861	160.63	62.137	196.54	4.6552	67.204	43.734		479.28	58.764	186.14	66.411	38.514	22.85	64.671		146.65	146.65	151.27	64.671	87.527	69.989	218.26	112.8	135.52	26.624
[truncated: 15,733 more rows]
[truncated: 4 more columns]
