# Supplementary material for: Integrin α5β1 nano-presentation regulates collective keratinocyte migration independent of substrate rigidity
Source: eLife. 2021 Sep 23;10:e69861. doi: 10.7554/eLife.69861 (PMC8460267; doi:10.7554/eLife.69861)
Supplement: Figure 4—source data 1. [file elife-69861-fig4-data1.xlsx]

## Sheet: Sheet1
	Migration speed (µm2)															Velocity CL (µm)
		11 kPa			23 kPa			55 kPa			90 kPa					11 kPa			23 kPa			55 kPa			90 kPa
		35nm	50nm	70nm	35nm	50nm	70nm	35nm	50nm	70nm	35nm	50nm	70nm			35nm	50nm	70nm	35nm	50nm	70nm	35nm	50nm	70nm	35nm	50nm	70nm
	a5b1 mimetic	3.7	3.68	4.4078	7.37143	13.9967	4.11405	11.24	13.6	2.245	7.46053	26.6064	5.935		a5b1 mimetic	184	138.7	250	146	306	118	370	480	108	249	281	124
		4.5	9.34	4.855	4.72733	12.5191	4.25351	7.285	11.325	6.295	10.8164	18.9154	7.825			146	181.8	275	303	394	93	214	148	154	132	456.8	128
		2.515	2.87	4.4078	8.08696	8.44057	5.09027	7.825	10.5	4.63	8.81822	12.4897	6.205			388	351	115	236	321	280	170	411	162	274.8	157.6	88
		1.255	2.87	3.865	6.40994	12.2209	4.18378	9.825	7.32	8.59	11.1637	15.0288	13.4			96	267	215	124	412	362	69	292	144.5	168.5	222.9	94
		3.505	2.425	3.055	7.1	18.4477	11.055	7.56	9.42	3.055	9.57149	13.3032	11.87			225	153	253.6	260	251	165	57	373	97.9	154	428.7	381.8
		5.035	7.4	0	3.145	24.8779	18.8991	13.145	13.8	1.885	9.61499	21.7338	8.5			202	376	419	113	312	143	211	498	110	161	508	70
		2.965	3.19	0	2.785	32.9924	13.0734	9.505	14.93	4	3.09236	10.165	9.355			286	531	148.7	128	323.3	178	203	445	62	193	277.9	81
		2.695	5.035	2.29	3.145	10.52	12.7982	7.155	15.02	3.75	4.54639	8.185	15.92			229	267	135	100	635.8	140	343	430	102	151	188	101
		2.335	9.715	1.885	3.055	13.94	19.633	14.3	15.2	1.95	8.58079	8	13			173	188.6	118	128	441	128	223	419	158		597	96
		4.585	2.8	4.8	2.875	16.2819	8.66972	11.5	22.485	3.3	6.48577	9.55	11.4455			178	113	122	172	463	107	184	314	310		413	190
		2.245	3.65	1.795	4.945	14.75	6.06061	7.95	14.385	6.1	5.93078	10.43	6.29091			174	148.8	100	262	333.8	132	395	471	327		198	237.4
		1.525	4.045	4.225		24.8	8.78788	8.35	21.945	7.55	10.2082	14.16	5.62			154	190	280.9	390		125	410	494	529		466	194
		2.875	3.05			21.13	7.57576	6.1	25.77	8.6	10.5454		10			140	354	152	139		284	229	495	530			165.1
		3.325	3.15	4.405			5.15152	16.7	20.955	2.95	13.882		5			359	118	114	565		143	82	251.5	282			264.7
		2.83	3.4	3.595			3.30827		15.74	3.3	17.3475					92	626	133.4			125		443	278			189
		2.115	5.4	1.975					23.785	3.4	13.4854					234	719	168					500	286
		1.795	6.5	0					11.6	7.45	9.7174					73	503						532	478
		5.395	3.055						10.43	6.45						264	461						544	162
		3.415	4.45							11.15						220	158							241
		2.02	3.235							8.25						242	279
			5.44							9.8						150.7	218
			9.94							8.5						121	293
																124
	Stress Correlation lenght (µm2)
		11 kPa			23 kPa			55 kPa
		35nm	50nm	70nm	35nm	50nm	70nm	35nm	50nm	70nm
	a5b1 mimetic	177	110	44.2	57	39	45	62	162	29.5
		76	418	44.2	35	68.5	38.5	41	305	38.2
		47.9	74	64.5	30.4	57	33.5	51.7	194	35.8
		58.6	296	64	28.7	221	40.8	47	128	44
		54	48	44.9	11	152	113	41	130	41
		106	194	45	144	217	126	38	138	64
		162	44	38.5	11	322	258	215	195	32
		71	169.8	31.9	49	344	7	48	139	40
		56.4	206.5	38.1	87	133	10	48		29
		123	291.9		126.9	180	16
		48
