# Supplementary material for: Integrin α5β1 nano-presentation regulates collective keratinocyte migration independent of substrate rigidity
Source: eLife. 2021 Sep 23;10:e69861. doi: 10.7554/eLife.69861 (PMC8460267; doi:10.7554/eLife.69861)
Supplement: Figure 5—source data 1. [file elife-69861-fig5-data1.xlsx]

## Sheet: Sheet1
		∆ Speed Ctrl - DECMA-1 (µm/h)
		35nm	50nm	70nm
	a5b1 mimetic	11.3112	-1.61254	6.63
		4.07143	0.464387	3.98
		2.0674	-1.74074	9.85
		16.2593	-2.43818	-1.7
		13.0055	-6.07635	5.845
		10.8711	6.61083	6.25
		1.25272	0.317999	-2.84794
		-0.823813	2.84319	0.914385
		0.864886	-2.19405	-1.182
		-3.1892	-7.03468	-5.13162
		2.5142	-7.62505	6.03199
		1.26181	0.600584	2.77441
		2.22029	-0.496897	3.40909
		1.12748	-4.046	0.480471
		4.09786	-0.959109	-0.774411
		10.4876	-2.1464	1.64646
		3.66659
		5.23869
